# Supplementary material
Source: publisher figshare collection journal article supplement (https://wiley.figshare.com/ndownloader/files/20151875)
Supplement: Supplementary file 1 [file 20151875]

## Sheet: End_result_amplitudes
RT (min)	Mass	41p_1	42p_1	43p_1	44p__2_1	45p_1	46p_1	47p_1	48p_1	49p_1	50p_1			51p_1	52p_1	53p_1	54p_1	54p__2_1	55p_1	56p__2_1						57p_1	58p_1	59p_1	60p_1	61p_1	62p_1				Mass		64p_1	66p_1	67p_1	68p_1				Mass		69p__2_1	70p_1	71p_1	72p_1
A	A	control	control	control	control	control	control	control	control	control	control	AVERAGE		mix	mix	mix	mix	mix	mix	mix	AVERAGE	RT (min)	MIX - CTL	Mass		EE2	EE2	EE2	EE2	EE2	EE2	AVERAGE	RT (min)	EE2 - CTL	A		diphen	diphen	diphen	diphen	AVERAGE	RT (min)	diphen - CTL	A		DEET	DEET	DEET	DEET
8	75	1	1	1	1	1	97613	1	1	1	1	9762.2		1	1	1	1	1	4192	1	599.714	8	0	75		1	1	1	1	1	1	1	8	0	75		1	1	1	1	1	8	0	75		1	1	1	1
8.00167	106	1	1	1	1	1	65	1	1	1	1	7.4		1	1	1	1	1	1	1	1	8.00167	0	106		1	149	1	1	1	1	25.6667	8.00167	0	106		1	1	1	1	1	8.00167	0	106		1	1	1	1
8.0025	236	1	1	1	1	1	1	1	1	1	1	1		1	1	1	1	1	27	1	4.71429	8.0025	0	236		1	1	1	1	1	1	1	8.0025	#DIV/0!	236		1	1	1	1	1	8.0025	#DIV/0!	236		1	1	1	1
8.00417	208	1	1	1	1	1	1	1	1	1	1	1		1	1	1	1	1	1	1	1	8.00417	#DIV/0!	208		1	1	1	1	1	1	1	8.00417	#DIV/0!	208		1	1	1	1	1	8.00417	#DIV/0!	208		1	1	1	1
8.00583	173	1	1	1	1	1	40	1	1	1	1	4.9		1	1	1	1	1	28	1	4.85714	8.00583	0	173		1	1	1	1	1	1	1	8.00583	0	173		1	1	1	1	1	8.00583	0	173		1	1	1	1
8.00917	455	1	1	1	1	1	1	1	1	1	1	1		1	1	1	1	1	1	1	1	8.00917	#DIV/0!	455		1	1	1	1	1	1	1	8.00917	#DIV/0!	455		1	1	1	1	1	8.00917	#DIV/0!	455		1	1	1	1
8.01083	172	1	1	1	1	1	339	1	1	1	1	34.8		1	1	1	1	1	306	1	44.5714	8.01083	0	172		1	1	1	1	1	1	1	8.01083	0	172		1	1	1	1	1	8.01083	0	172		1	1	1	1
8.01167	409	1	1	1	1	1	1	1	1	1	1	1		1	1	1	1	1	7	1	1.85714	8.01167	0	409		1	1	1	1	1	1	1	8.01167	#DIV/0!	409		1	1	1	1	1	8.01167	#DIV/0!	409		1	1	1	1
8.01333	113	1	1	1	1	1	521	1	1	1	1	53		1	1	1	1	1	1	1	1	8.01333	0	113		1	1	1	1	1	1	1	8.01333	0	113		1	1	1	1	1	8.01333	0	113		1	1	1	1
8.01417	143	1	1	1	1	1	6034	1	1	1	1	604.3		1	1	1	1	1	1	1	1	8.01417	0	143		1	1	1	1	1	1	1	8.01417	0	143		1	1	1	1	1	8.01417	0	143		1	1	1	1
8.01583	190	1	1	1	1	1	1	1	1	1	1	1		1	1	1	1	1	1	1	1	8.01583	#DIV/0!	190		1	1	1	1	1	1	1	8.01583	#DIV/0!	190		1	1	1	1	1	8.01583	#DIV/0!	190		1	1	1	1
8.02417	206	1	1	1	1	1	1	1	16	1	1	2.5		1	1	1	1	1	1	1	1	8.02417	0	206		1	1	1	1	1	1	1	8.02417	0	206		1	1	1	1	1	8.02417	0	206		1	1	1	1
8.025	167	1	1	1	1	1	444	1	1	1	1	45.3		1	1	1	1	1	65	1	10.1429	8.025	0	167		1	1	1	1	1	1	1	8.025	0	167		1	1	388	1	97.75	8.025	0	167		1	592	1	1
8.02583	96	1	1	1	1	1	1	1	1	1	1	1		1	1	1	1	1	467	1	67.5714	8.02583	0	96		1	113	1	1	1	1	19.6667	8.02583	0	96		1	1	1	1	1	8.02583	#DIV/0!	96		1	1	1	1
8.02667	69	1	1	1	1	1	1	1	57	1	1	6.6		1	1	1	1	1	1	1	1	8.02667	0	69		1	3497	1	1	1	1	583.667	8.02667	0	69		1	1	1	1	1	8.02667	0	69		1	1	1	1
8.0275	250	1	1	1	1	1	1	1	69	1	1	7.8		1	1	1	1	1	1	1	1	8.0275	0	250		1	1	1	1	1	1	1	8.0275	0	250		1	1	1	1	1	8.0275	0	250		1	1	1	1
8.02833	235	1	1	1	1	1	1	1	96	1	1	10.5		1	1	1	1	1	1	1	1	8.02833	0	235		1	1	1	1	1	1	1	8.02833	0	235		1	1	12	1	3.75	8.02833	0	235		1	1	1	1
8.02917	207	1	1	1	1	1	1	1	1	1	1	1		1	1	1	1	1	35	1	5.85714	8.02917	0	207		1	1	1	1	1	1	1	8.02917	#DIV/0!	207		1	1	22	1	6.25	8.02917	0	207		1	76	1	1
8.03	494	1	1	1	1	1	1	1	1	1	1	1		1	1	1	1	1	1	1	1	8.03	#DIV/0!	494		1	1	1	1	1	1	1	8.03	#DIV/0!	494		1	1	1	1	1	8.03	#DIV/0!	494		1	1	1	1
8.03083	211	1	1	1	1	1	1	1	1	1	1	1		1	1	1	1	1	1133	1	162.714	8.03083	0	211		1	509	1	1	1	1	85.6667	8.03083	0	211		1	1	1	1	1	8.03083	#DIV/0!	211		1	402	1	1
8.03167	157	1	1	1	1	1	3595	1	1	1	1	360.4		1	1	1	1	1	1982	1	284	8.03167	0	157		1	254	1	1	1	1	43.1667	8.03167	0	157		1	1	1	1	1	8.03167	0	157		1	1252	1	1
8.0325	78	1	1	1	1	1	7393	1	1	1	1	740.2		1	1	1	1	1	1	1	1	8.0325	0	78		1	217	1	1	1	1	37	8.0325	0	78		1	1	1	1	1	8.0325	0	78		1	1	1	1
8.03417	107	1	1	1	1	1	736	1	1	1	1	74.5		1	1	1	1	1	1	1	1	8.03417	0	107		1	226	1	1	1	1	38.5	8.03417	0	107		1	1	1	1	1	8.03417	0	107		1	69	1	1
8.03667	105	4212	1	1	1	1	2856	1	1686	1	1	876.1		1	1	1	1	1	1	1	1	8.03667	0	105		1	1	1	1	1	1	1	8.03667	0	105		1	1	1	1	1	8.03667	0	105		1	1	1	1
8.0375	366	1	1	1	1	1	1	1	1	1	1	1		1	1	1	1	1	1	1	1	8.0375	#DIV/0!	366		1	1	1	1	1	1	1	8.0375	#DIV/0!	366		1	1	1	1	1	8.0375	#DIV/0!	366		1	1	1	1
8.03833	131	9868	1	12	1	1	6256	1	4028	1	1	2017		1	1	1	1	1	1	1	1	8.03833	0	131		1	354	1	1	1	1	59.8333	8.03833	0	131		1	1	93	1	24	8.03833	0	131		1	1	1	1
8.03917	178	2319	1	1	1	1	1523	1	1707	1	55	561		1	2286	1	1	1	1448	1	534.143	8.03917	0	178		1	56	1	1	1	1	10.1667	8.03917	0	178		1	1	63	1	16.5	8.03917	0	178		1	1	1	1
8.04	161	83476	1	9	1	1	54037	1	55911	1	1	19343.9		1	74124	1	1	1	50286	1	17773.6	8.04	0	161		1	492	1	1	1670	1	361	8.04	0	161		1	1	1648	1	412.75	8.04	0	161		1	1	1	1
8.04083	176	93076	1	1	1	1	57826	71024	57037	1	1	27896.9		1	79252	1	1	1	52433	1	18812.9	8.04083	0	176		1	3597	1	1	1	1	600.333	8.04083	0	176		1	1	58005	1	14502	8.04083	0	176		1	55815	1	1
8.04167	175	680156	1	1	1	1	416482	1	420675	1	246395	176371		1	583044	1	1	1	381503	1	137793	8.04167	0	175		1	1	1	1	14407	1	2402	8.04167	0	175		1	1	11663	1	2916.5	8.04167	0	175		1	1	1	1
8.0425	75	634882	1	1	1	1	464092	1	486178	1	1	158516		1	1	1	1	1	1	1	1	8.0425	0	75		1	28137	1	1	1	1	4690.33	8.0425	0	75		1	1	28880	1	7220.75	8.0425	0	75		1	2909	1	1
8.04333	89	12226	1	1	1	1	47	1	1	1	1	1228.1		1	1	1	1	1	1	1	1	8.04333	0	89		1	901	1	1	1	1	151	8.04333	0	89		1	1	1	1	1	8.04333	0	89		1	1	1	1
8.04417	100	9685	1	1	1	1	8695	1	7614	1	2679	2867.9		1	8571	1	1	1	6996	1	2224.57	8.04417	0	100		1	1	1	1	1	1	1	8.04417	0	100		1	1	1	1	1	8.04417	0	100		1	1	1	1
8.045	139	124	1	54	1	1	107	1	70	1	1	36.1		1	1	455	1	1	1	1	65.8571	8.045	0	139		1	30	1	1	1	1	5.83333	8.045	0	139		1	1	73	1	19	8.045	0	139		1	37	1	1
8.04583	200	20	1	1	1	1	8	1	82	1	44	16		1	1	1	1	1	1	1	1	8.04583	0	200		1	40	1	1	1	1	7.5	8.04583	0	200		1	1	52	1	13.75	8.04583	0	200		1	139	1	1
8.04667	154	6	64	36	1	1	8	147	120	1	1	38.5		1	1	1	1	1	1	1	1	8.04667	0	154		1	84	1	1	47	1	22.5	8.04667	0	154		1	1	46	33	20.25	8.04667	0	154		1	42	55	1
8.0475	228	1	1	1	1	1	1	1	66	1	1	7.5		1	1	1	1	1	1	1	1	8.0475	0	228		1	1	1	1	1	1	1	8.0475	0	228		1	1	1	1	1	8.0475	0	228		1	1	1	1
8.04833	188	459	1	44	1	1	147	153	142	1	227	117.6		1	87	1	1	1	71	1	23.2857	8.04833	0	188		1	6	1	1	1	1	1.83333	8.04833	0	188		1	1	1	1	1	8.04833	0	188		1	1	1	1
8.04917	191	1	1	1	1	1	1	1	1	1	1	1		1	1	1	1	1	48	1	7.71429	8.04917	0	191		1	1	1	1	1	1	1	8.04917	#DIV/0!	191		1	1	1	1	1	8.04917	#DIV/0!	191		1	1	1	1
8.05	456	1	1	1	1	1	1	1	85	1	1	9.4		1	1	1	1	1	1	1	1	8.05	0	456		1	1	1	1	1	1	1	8.05	0	456		1	1	1	1	1	8.05	0	456		1	1	1	1
8.05083	193	146	40	5	1	1	22	1	62	1	27	30.6		1	1	280	1	1	1	1	40.8571	8.05083	0	193		1	162	1	1	1	1	27.8333	8.05083	0	193		1	1	1	1	1	8.05083	0	193		1	96	1	1
8.05167	504	1	1	1	1	1	1	1	83	1	1	9.2		1	1	1	1	1	1	1	1	8.05167	0	504		1	1	1	1	1	1	1	8.05167	0	504		1	1	1	1	1	8.05167	0	504		1	1	1	1
8.0525	141	697	1	1	1	1	564	8	505	1	1	178		1	1	1	1	1	184	1	27.1429	8.0525	0	141		1	327	1	1	1	1	55.3333	8.0525	0	141		1	1	536	1	134.75	8.0525	0	141		1	122	1	1
8.05333	83	430	144	1	1	1	1	1	353	1	1	93.4		1	1	1	1	1	1	1	1	8.05333	0	83		1	422	1	1	1	1	71.1667	8.05333	0	83		1	1	1213	1	304	8.05333	0	83		1	1	1	1
8.05417	192	356	1	14	1	1	1	1	122	1	213	71.1		1	1	1	1	1	1	1	1	8.05417	0	192		1	66	1	1	1	1	11.8333	8.05417	0	192		1	1	1	1	1	8.05417	0	192		1	71	1	1
8.055	303	1	1	1	1	1	1	1	5	1	1	1.4		1	1	1	1	1	198	1	29.1429	8.055	0	303		1	5	1	1	25	1	5.66667	8.055	0	303		1	1	340	1	85.75	8.055	0	303		1	263	1	1
8.05583	171	4574	1	1	1	1	1192	1	3829	1	1	960.2		1	1	1	1	1	3568	1	510.571	8.05583	0	171		1	76	1	1	1	1	13.5	8.05583	0	171		1	1	4685	1	1172	8.05583	0	171		1	2158	1	1
8.05667	76	1	6486	1	1	1	26343	1	23440	1	1	5627.6		1	30069	1	1	1	19201	1	7039.29	8.05667	0	76		1	1	1	1	1	1	1	8.05667	0	76		1	1	1	1	1	8.05667	0	76		1	1	1	1
8.0575	97	1935	983	132	1	1	1	1	1103	1	1	415.9		1	18	1	1	1	1410	1	204.714	8.0575	0	97		1	832	1	1	37	1	145.5	8.0575	0	97		1	1	2020	1	505.75	8.0575	0	97		1	902	1	1
8.05833	282	1	1	1	1	1	1	1	1	1	1	1		1	67	1	1	1	25	1	13.8571	8.05833	0	282		1	1	1	1	1	1	1	8.05833	#DIV/0!	282		1	1	1	1	1	8.05833	#DIV/0!	282		1	1	1	1
8.05917	96	845	302	55	1	1	1	5	306	1	1	151.8		1	1	1	1	1	1	1	1	8.05917	0	96		1	1	1	1	1100	1	184.167	8.05917	0	96		1	1	1193	1	299	8.05917	0	96		1	1	1	1
8.06	113	291	1	1	1	1	343	1	428	1	1	106.9		1	188	350	1	1	1	1	77.5714	8.06	0	113		1	789	1	1	606	1	233.167	8.06	0	113		1	1	1168	1	292.75	8.06	0	113		1	480	1	1
8.06083	120	2107	1	1	1	1	756	1	1486	1	1	435.6		1	1	1	1	1	713	1	102.714	8.06083	0	120		1	1	1	1	249	1	42.3333	8.06083	0	120		1	1	1	1	1	8.06083	0	120		1	1	1	1
8.06167	155	737	1	90	1	1	46320	58	232	1	1	4744.2		1	1	12519	1	1	775	1	1899.86	8.06167	0	155		1	1324	1	1	329	1	276.167	8.06167	0	155		1	1	1345	1	337	8.06167	0	155		1	575	1	1
8.0625	77	61447	1	69457	1	1	14782	1	38667	1	1	18435.9		1	1	1	1	1	10917	1	1560.43	8.0625	0	77		1	6751	1	1	1	1	1126	8.0625	0	77		1	1	1	1	1	8.0625	0	77		1	41	1	1
8.06333	95	2313	1	1991	1	1	98	10	763	1	1	518		1	1	1	1	1	530	1	76.5714	8.06333	0	95		1	1	1	1	53	1	9.66667	8.06333	0	95		1	1	421	1	106	8.06333	0	95		1	385	1	1
8.06417	69	13273	1	19112	1	1	2495	21	9074	1	1	4398		1	1	1	1	1	1	1	1	8.06417	0	69		1	1	1	1	1	1	1	8.06417	0	69		1	1	1	1	1	8.06417	0	69		1	1	1	1
8.065	78	20171	1	17937	1	1	9695	1	12725	1	1	6053.4		1	1	1	1	1	4325	1	618.714	8.065	0	78		1	1	1	1	1	1	1	8.065	0	78		1	1	1	1	1	8.065	0	78		1	6296	3	1
8.06583	79	103162	1	1	1	1	4611	1	50797	1	1	15857.7		1	1	1	1	1	26326	1	3761.71	8.06583	0	79		1	6001	1	1	1	1	1001	8.06583	0	79		1	1	1	1	1	8.06583	0	79		1	16900	1	1
8.06667	104	1	1	1	1	1	12460	1	13403	1	1	2587.1		1	16127	1	1	1	10375	1	3786.71	8.06667	0	104		1	1	1	1	369	1	62.3333	8.06667	0	104		1	1	1	1	1	8.06667	0	104		1	1	35	1
8.0675	147	80402	1	1	1	1	21134	1	1	1	1	10154.4		1	1	1	1	1	34215	1	4888.71	8.0675	0	147		1	1	1	1	1	1	1	8.0675	0	147		1	1	1	1	1	8.0675	0	147		1	1	1	1
8.07	87	1	1130	1	1	1	1	1	998	1	1	213.6		1	128	1	1	1	1908	1	291.571	8.07	0	87		1	1	1	1	1980	1	330.833	8.07	0	87		1	1	281	1	71	8.07	0	87		1	45	1	1
8.07083	164	1	1	1	1	1	104	1	200	1	1	31.2		1	182	1	1	1	138	1	46.4286	8.07083	0	164		1	1	1	1	5	1	1.66667	8.07083	0	164		1	1	1	1	1	8.07083	0	164		1	1	1	1
8.07167	118	1	2071	1145	1	1	1	1	2063	1	1	528.6		1	13643	1	1	1	8908	1	3222.29	8.07167	0	118		1	1	1	1	343	1	58	8.07167	0	118		1	1	1	1	1	8.07167	0	118		1	1	1	1
8.0725	115	1	1	1	1	1	6356	1	6939	1	51	1335.3		1	9177	1	1	1	5016	1	2028.29	8.0725	0	115		1	2678	1	1	3033	1	952.5	8.0725	0	115		1	1	1	1	1	8.0725	0	115		1	1	1	135
8.07333	128	1	1	1	1	1	1	1	1	1	38	4.7		1	2392	1	1	1	1356	1	536.143	8.07333	0	128		1	1	1	1	186	1	31.8333	8.07333	0	128		1	1	1	1	1	8.07333	0	128		1	1	1	1
8.075	253	1	1	1	1	1	35	1	91	1	1	13.4		1	1	1	1	1	28	1	4.85714	8.075	0	253		1	1	1	1	1	1	1	8.075	0	253		1	1	1	1	1	8.075	0	253		1	33	1	1
8.07583	145	1	10	1	1	1	2274	1	2286	1	1	457.7		1	3223	1	1	1	2657	1	840.714	8.07583	0	145		1	1	1	1	584	1	98.1667	8.07583	0	145		1	1	1	1	1	8.07583	0	145		1	1	667	1
8.0775	236	1	1	1	1	1	1	1	1	1	1	1		1	1	1	1	1	749	1	107.857	8.0775	0	236		1	1	1	1	492	1	82.8333	8.0775	0	236		1	1	1	1	1	8.0775	#DIV/0!	236		1	39	1	1
8.07917	212	1	1	1	1	1	1	54	1	1	1	6.3		1	1	1	1	1	154	1	22.8571	8.07917	0	212		1	52	1	1	145	1	33.5	8.07917	0	212		1	1	181	1	46	8.07917	0	212		1	187	1	1
8.08	273	1	1	1	1	1	1	1	87	1	1	9.6		1	1	1	1	1	1	1	1	8.08	0	273		1	1	1	1	1	1	1	8.08	0	273		1	1	1	1	1	8.08	0	273		1	1	1	1
8.08083	195	587	25	544	1	1	1	1	539	1	1	170.1		1	1	1	1	1	1	1	1	8.08083	0	195		1	1	1	1	1	1	1	8.08083	0	195		1	1	83	1	21.5	8.08083	0	195		1	191	1	19
8.08167	85	260	1	1	1	1	1	5965	1	1	52	628.4		1	8539	667	1	1	6688	1	2271.14	8.08167	0	85		1	1769	1	1	777	1	425	8.08167	0	85		1	1	9327	1	2332.5	8.08167	0	85		1	5292	1	1
8.0825	144	29	1	1	1	1	5577	1	5247	1	3112	1397.1		1	7535	1	1	1	4607	1	1735.29	8.0825	0	144		1	1	1	1	207	1	35.3333	8.0825	0	144		1	1	402	1	101.25	8.0825	0	144		1	1	1	1
8.08417	99	14	1	1	1	1	1	978	116	1	1	111.5		1	287	764	1	1	745	1	257.143	8.08417	0	99		1	1	1	1	1	1	1	8.08417	0	99		1	1	1744	1	436.75	8.08417	0	99		1	1	1	396
8.085	207	1	1	1	1	1	1	1	1	1	1	1		1	1	1	1	1	1	1	1	8.085	#DIV/0!	207		1	1	1	1	1	1	1	8.085	#DIV/0!	207		1	1	1	1	1	8.085	#DIV/0!	207		1	1	1	1
8.08583	220	1	1	1	1	1	1	34	64	1	1	10.6		1	1	1	1	1	1	1	1	8.08583	0	220		1	1	1	1	1	1	1	8.08583	0	220		1	1	1	1	1	8.08583	0	220		1	1	1	1
8.0875	168	1	1	1	1	1	1	21	103	1	1	13.2		1	1	1	1	1	35	1	5.85714	8.0875	0	168		1	1	1	1	40	1	7.5	8.0875	0	168		1	1	1	1	1	8.0875	0	168		1	33	1	1
8.08833	90	582	1	1	1	1	3125	1469	3357	1	627	916.5		1	3779	125	1	1	2807	1	959.286	8.08833	0	90		1	222	1	1	1	1	37.8333	8.08833	0	90		1	1	2963	1	741.5	8.08833	0	90		1	1247	1	1
8.08917	287	1	1	1	1	1	21	1	73	1	1	10.2		1	1	1	1	1	46	1	7.42857	8.08917	0	287		1	36	1	1	20	1	10	8.08917	0	287		1	1	57	1	15	8.08917	0	287		1	48	42	1
8.09083	89	5159	4163	21140	1	1	18488	1	19336	1	1	6829.1		1	1941	1284	1	1	1	1	461.429	8.09083	0	89		1	1127	1	1	774	1	317.5	8.09083	0	89		1	1	1	1	1	8.09083	0	89		1	6141	1	1
8.09167	169	1	1	1	1	1	1	84	110	1	1	20.2		1	1	1	1	1	1	1	1	8.09167	0	169		1	1	1	1	1	1	1	8.09167	0	169		1	1	1	1	1	8.09167	0	169		1	1	1	1
8.0925	187	1	1	1	1	1	14	1	1	1	1	2.3		1	1	1	1	1	68	1	10.5714	8.0925	0	187		1	1	1	1	28	1	5.5	8.0925	0	187		1	1	1	1	1	8.0925	0	187		1	1	23	1
8.09333	61	4847	1	1	1	1	65747	43380	68824	1	8502	19130.5		1	74939	8153	1	1	57705	1	20114.4	8.09333	0	61		1	6834	1	1	1	1	1139.83	8.09333	0	61		1	1	78279	1	19570.5	8.09333	0	61		1	1	1	1
8.09417	150	1	1	110	1	1	94	144	142	1	142	63.7		1	127	1	1	1	1	1	19	8.09417	0	150		1	574	1	1	60	1	106.333	8.09417	0	150		1	1	132	1	33.75	8.09417	0	150		1	97	34	88
8.095	133	4656	1	1	1	1	28276	6332	28128	1	4098	7149.5		1	34384	1	135	1	25219	1	8534.57	8.095	0	133		1	2057	1	1	1	1	343.667	8.095	0	133		1	1	15342	1	3836.25	8.095	0	133		1	6133	1	1
8.09583	160	2	1	1	1	1	1	1	1	1	271092	27110.2		1	623102	1	1	1	424412	1	149646	8.09583	0	160		1	1	1	1	20029	1	3339	8.09583	0	160		1	1	1	1	1	8.09583	0	160		1	1	1	1
8.09667	78	1	1	1	1	1	1	1	1	57	9568	963.3		1	13311	6357	133	1	7234	1	3862.57	8.09667	0	78		1	1	1	1	3616	1	603.5	8.09667	0	78		1	1	1665	1	417	8.09667	0	78		1	1	2675	1
8.0975	265	1	1	1	1	1	1	69	87	1	1	16.4		1	45	21	1	1	1	1	10.1429	8.0975	0	265		1	1	1	1	1	1	1	8.0975	0	265		1	1	1	1	1	8.0975	0	265		1	1	1	1
8.09833	205	1	1	71	1	1	7	1	49	1	113	24.6		1	63	1	1	1	74	1	20.2857	8.09833	0	205		1	53	1	1	63	1	20	8.09833	0	205		1	1	105	1	27	8.09833	0	205		1	54	1	1
8.09917	251	1	46	21	1	1	43	146	1	3	40	30.3		1	1	1	1	1	84	1	12.8571	8.09917	0	251		1	75	1	1	1	1	13.3333	8.09917	0	251		1	1	88	1	22.75	8.09917	0	251		1	88	26	1
8.1	65	62	1	76	1	1	301	5991	126	1	1	656.1		1	284	8402	1	1	3385	1	1725	8.1	0	65		1	1	1	1	1	1	1	8.1	0	65		1	1	3963	1	991.5	8.1	0	65		1	5737	1	428
8.10083	170	1	1	1	1	1	726	977	1	1	1343	305.3		1	880	1610	1	1	945	1	491.286	8.10083	0	170		1	1	1	1	802	1	134.5	8.10083	0	170		1	1	1	1	1	8.10083	0	170		1	1159	1208	1
8.10167	426	1	1	1	1	1	1	88	97	1	1	19.3		1	1	1	1	1	1	1	1	8.10167	0	426		1	1	1	1	1	1	1	8.10167	0	426		1	1	1	1	1	8.10167	0	426		1	1	1	1
8.1025	572	1	1	1	1	1	1	1	1	1	1	1		1	1	1	1	1	1	1	1	8.1025	#DIV/0!	572		1	1	1	1	1	1	1	8.1025	#DIV/0!	572		1	1	1	1	1	8.1025	#DIV/0!	572		1	10	1	1
8.10333	211	1	1	1	1	1	1	1	1	1	1	1		1	1	1	1	1	1	1	1	8.10333	#DIV/0!	211		1	955	1	1	1042	1	333.5	8.10333	0	211		1	1	1430	1	358.25	8.10333	0	211		1	1488	1012	1
8.10417	106	1005	61	1	1	1	828	1	574	1	522	299.5		1	758	22291	1	1	693	1	3392.29	8.10417	0	106		1	641	1	1	282	1	154.5	8.10417	0	106		1	1	220	1	55.75	8.10417	0	106		1	283	222	1
8.105	201	1	1	1	1	1	1	1	1	1	1	1		1	1	1	1	1	1	1	1	8.105	#DIV/0!	201		1	1	1	1	1	1	1	8.105	#DIV/0!	201		1	1	1	1	1	8.105	#DIV/0!	201		1	1	1	1
8.10583	143	1	1	1	1	1	2448	1938	1	1	1	439.4		1	5285	1	1	1	2724	1	1144.86	8.10583	0	143		1	1	1	1	2608	1	435.5	8.10583	0	143		1	1	5738	1	1435.25	8.10583	0	143		1	575	2711	9620
8.10667	171	34	3223	1	1	1	2851	66	1	1	1	618		1	1	148	1	1	1	1	22	8.10667	0	171		1	1407	1	1	55	1	244.333	8.10667	0	171		1	1	145	333	120	8.10667	0	171		1	277	1	11829
8.1075	69	1	1	1	1	1	2841	1	1	1	9762	1261.1		1	10804	499	139	1	1	1	1635.14	8.1075	0	69		1	1592	1	1	2078	1	612.333	8.1075	0	69		1	1	1	1	1	8.1075	0	69		1	3075	4914	1
8.10833	87	438	1	4141	1	1	1	1348	7461	1	3657	1705		1	4396	347	41	1	5388	1	1453.57	8.10833	0	87		1	1	1	1	1565	1	261.667	8.10833	0	87		1	1	5317	1	1330	8.10833	0	87		1	2544	1	1
8.10917	103	90	1	1	1	1	1	113138	1	1	1	11323.6		1	1	8918	45	1	1	1	1281.14	8.10917	0	103		1	1	1	1	1	1	1	8.10917	0	103		1	1	114846	1	28712.2	8.10917	0	103		1	81338	1	1
8.11	147	74469	1	1	1	1	50227	1	60286	1	55407	24039.5		1	62409	628	1	1	1	1	9006	8.11	0	147		1	104812	1	1	27166	1	21997	8.11	0	147		1	1	41074	1	10269.2	8.11	0	147		1	25043	1	1
8.11083	79	1	1	1	1	1	20316	1	1	1	43783	6410.7		1	101448	49837	1	1	50639	1	28846.9	8.11083	0	79		1	31205	1	1	32555	1	10627.3	8.11083	0	79		1	1	13987	1	3497.5	8.11083	0	79		1	1	13332	1
8.11167	104	1	1	1	1	1	1	13752	58	1	1	1381.8		1	1	2383	1	1	186	1	367.714	8.11167	0	104		1	1	1	1	1	1	1	8.11167	0	104		1	1	15317	1	3830	8.11167	0	104		1	9501	1	1
8.1125	73	1	1	6664	1	1	1	400235	18396	1	188482	61378.3		1	538293	42892	1	1	356544	1	133962	8.1125	0	73		1	51456	1	1	36217	1	14612.8	8.1125	0	73		1	1	641691	1	160424	8.1125	0	73		1	324420	1	1
8.11333	117	1	1	1	1	1	12197	93558	15243	1	767	12177.1		1	15376	26795	1	1	1	1	6025.14	8.11333	0	117		1	1	1	1	1	1	1	8.11333	0	117		1	1	96236	1	24059.8	8.11333	0	117		1	72459	1	1
8.11417	162	1	1	1	1	1	1	23357	1	8	1	2337.3		1	1	379	1	1	1	1	55	8.11417	0	162		1	1	1	1	1	1	1	8.11417	0	162		1	1	21843	1	5461.5	8.11417	0	162		1	17985	1	1
8.115	92	1	1	1	1	1	4113	1	4979	1	1832	1093.1		1	5716	1203	1	1	4280	1	1600.43	8.115	0	92		1	526	1	1	1	1	88.5	8.115	0	92		1	1	435	1	109.5	8.115	0	92		1	1	231	1
8.11583	175	1	1	1	1	1	1	511155	1	1	1	51116.4		1	1	1	1	1	1	1	1	8.11583	0	175		1	1	1	1	1	1	1	8.11583	0	175		1	1	412366	1	103092	8.11583	0	175		1	402193	1	1
8.11667	128	1	1	1	1	1	1	1856	1	1	1	186.5		1	1	1	1	1	22	1	4	8.11667	0	128		1	122	1	1	1	1	21.1667	8.11667	0	128		1	1	1847	1	462.5	8.11667	0	128		1	1282	1	1
8.1175	215	1	1	1	1	1	1	1	1	1	1	1		1	1	1	1	1	1	1	1	8.1175	#DIV/0!	215		1	9	1	1	35	1	8	8.1175	0	215		1	1	82	1	21.25	8.1175	0	215		1	91	42	1
8.11833	93	1	1	1	1	1	2645	1	3564	1	2232	844.8		1	4025	4162	1	1	4303	1	1784.86	8.11833	0	93		1	1	1	1	576	1	96.8333	8.11833	0	93		1	1	545	1	137	8.11833	0	93		1	1	1	1
8.11917	172	148	238	1	1	1	1	852	1	72	56	137.1		1	324	251	1	1	736	1	187.857	8.11917	0	172		1	1	1	1	1	1	1	8.11917	0	172		1	1	832	1	208.75	8.11917	0	172		1	620	1	1478
8.12	130	1154	1	1094	1	1	1810	110238	933	1	52899	16813.2		1	126914	1	2564	1	82478	1	30280	8.12	0	130		1	1	1	1	4588	1	765.5	8.12	0	130		1	1	102783	1	25696.5	8.12	0	130		1	83419	1	1
8.12083	166	1	42	97	1	1	1	1	1	1	1	14.7		1	1	1	1	1	47	1	7.57143	8.12083	0	166		1	1	1	1	1	1	1	8.12083	0	166		1	1	1	1	1	8.12083	0	166		1	1	1	1
8.12167	89	1	1	1	1	1	1	6995	1	1	1309	831.2		1	16956	1	1	1	19552	1	5216.14	8.12167	0	89		1	7431	1	1	1	1	1239.33	8.12167	0	89		1	1	16544	1	4136.75	8.12167	0	89		1	1	1	1
8.1225	114	1	1	1	1	1	1	18565	1	1	1	1857.4		1	1	1	1	1	503	1	72.7143	8.1225	0	114		1	1	1	1	1	1	1	8.1225	0	114		1	1	17531	1	4383.5	8.1225	0	114		1	13975	1	16
8.12333	206	1	1	1	1	1	1	1	1	1	1	1		1	1	1	1	1	1	1	1	8.12333	#DIV/0!	206		1	1	1	1	1	1	1	8.12333	#DIV/0!	206		1	1	1	1	1	8.12333	#DIV/0!	206		1	1	1	1
8.12417	129	1	1	1	1	1	1	1952	1	1	862	282.2		1	1164	13	1	1	1381	1	366	8.12417	0	129		1	1	1	1	416	1	70.1667	8.12417	0	129		1	1	2432	1	608.75	8.12417	0	129		1	1577	1	650
8.125	362	1	1	1	1	1	1	1	78	1	1	8.7		1	1	1	1	1	1	1	1	8.125	0	362		1	1	1	1	3	1	1.33333	8.125	0	362		1	1	1	1	1	8.125	0	362		1	1	1	1
8.12583	513	1	1	1	1	1	1	1	1	1	1	1		1	1	1	1	1	1	1	1	8.12583	#DIV/0!	513		1	1	1	1	1	1	1	8.12583	#DIV/0!	513		1	1	1	1	1	8.12583	#DIV/0!	513		1	1	1	25
8.12667	157	1	374	1	1	1	1	1	1	1	1	38.3		1	1	1	1	1	1	1	1	8.12667	0	157		1	1	1	1	1	1	1	8.12667	0	157		1	1	1	1	1	8.12667	0	157		1	1	1	1
8.1275	411	1	1	1	1	1	1	54	85	1	1	14.7		1	1	1	1	1	1	1	1	8.1275	0	411		1	1	1	1	1	1	1	8.1275	0	411		1	1	1	1	1	8.1275	0	411		1	1	1	1
8.12833	87	1	1	1	1	1	1	1	1	1	1	1		1	1	1	1	1	1	1	1	8.12833	#DIV/0!	87		1	6042	1	1	1	1	1007.83	8.12833	0	87		1	1	1	1	1	8.12833	#DIV/0!	87		1	1	1	1
8.12917	412	1	1	3	1	1	1	41	85	1	1	13.6		1	1	1	1	1	1	1	1	8.12917	0	412		1	1	1	1	1	1	1	8.12917	0	412		1	1	1	1	1	8.12917	0	412		1	1	1	1
8.13	155	1	843	1	1	1	1	1	1	947	1	179.8		1	1	1	1	1	1	1	1	8.13	0	155		1	934	1	1	799	1	289.5	8.13	0	155		1	1	1	1	1	8.13	0	155		1	1	616	984
8.13083	147	1	1	1	1	1	1	38640	1	1	1	3864.9		1	1	1	1	1	48952	1	6994	8.13083	0	147		1	1	1	1	1	1	1	8.13083	0	147		1	1	43578	1	10895.2	8.13083	0	147		1	32172	1	1
8.13167	63	1	1	1	1	1	455	1	3690	20	1683	585.4		1	3967	9283	1	1	3108	1	2337.43	8.13167	0	63		1	1	1	1	1	1	1	8.13167	0	63		1	1	1922	1	481.25	8.13167	0	63		1	1	1	1
8.1325	120	1	1	1	1	1	1733	1443	1	1	2584	576.7		1	1285	31604	1	1	1779	1	4953.14	8.1325	0	120		1	1867	1	1	1305	1	529.333	8.1325	0	120		1	1	2194	1	549.25	8.1325	0	120		1	1471	1045	1
8.13417	262	1	1	1	1	1	1	1	1	1	1	1		1	1	1	1	1	1	1	1	8.13417	#DIV/0!	262		1	21	1	1	1	1	4.33333	8.13417	0	262		1	1	1	1	1	8.13417	#DIV/0!	262		1	1	1	1
8.135	225	1	186	68	1	1	1	1	1	65	1	32.6		1	193	1	1	1	234	1	61.7143	8.135	0	225		1	1	1	1	39	1	7.33333	8.135	0	225		1	1	250	68	80	8.135	0	225		1	1	1	285
8.13583	77	1	1	1	1	1	20832	38836	1	1	38818	9849.3		1	53218	23190	1	1	21519	1	13990.1	8.13583	0	77		1	16068	1	1	1	1	2678.83	8.13583	0	77		1	1	1	1	1	8.13583	0	77		1	1	28948	1
8.13667	246	1	1	1	1	1	1	1	1	1	1	1		1	1	1	1	1	1	1	1	8.13667	#DIV/0!	246		1	1	1	1	1	1	1	8.13667	#DIV/0!	246		1	1	1	1	1	8.13667	#DIV/0!	246		1	14	1	1
8.1375	251	1	1	1	1	1	1	1	1	1	1	1		1	1	1	1	1	1	1	1	8.1375	#DIV/0!	251		1	49	1	1	1	1	9	8.1375	0	251		1	1	1	1	1	8.1375	#DIV/0!	251		1	22	1	1
8.13833	78	1	1	1	1	1	1	12558	1	1	1	1256.7		1	1	1	1	1	1	1	1	8.13833	0	78		1	5859	1	1	1	1	977.333	8.13833	0	78		1	1	5020	1	1255.75	8.13833	0	78		1	10405	1	1
8.13917	238	1	43	33	1	1	51	1	1	1	30	16.3		1	1	1	1	1	1	1	1	8.13917	0	238		1	7	1	1	1	1	2	8.13917	0	238		1	1	1	1	1	8.13917	0	238		1	16	1	1
8.14	121	1	1	1	1	1	2380	1	1	1	434	282.2		1	1	90092	1	1	1852	1	13135.6	8.14	0	121		1	1447	1	1	1	1	242	8.14	0	121		1	1	1	1	1	8.14	0	121		1	1	1	1
8.14083	66	1	1	1	1	1	1	1	1	1	1	1		1	9966	915	1	1	22614	1	4785.57	8.14083	0	66		1	1	1	1	1	1	1	8.14083	#DIV/0!	66		1	1	10661	1	2666	8.14083	0	66		1	1	1	1
8.14167	119	1	243	1	1	1	1	1	1	1	1	25.2		1	1	1	1	1	1464	1	210	8.14167	0	119		1	5004	1	1	2782	1	1298.33	8.14167	0	119		1	1	1	629	158	8.14167	0	119		1	1	2044	1
8.1425	329	1	1	1	1	1	1	87	92	1	1	18.7		1	1	1	1	1	1	1	1	8.1425	0	329		1	1	1	1	1	1	1	8.1425	0	329		1	1	1	1	1	8.1425	0	329		1	5	12	1
8.14333	340	1	1	1	1	1	1	79	93	1	1	18		1	1	1	1	1	1	1	1	8.14333	0	340		1	1	1	1	3	1	1.33333	8.14333	0	340		1	1	1	1	1	8.14333	0	340		1	1	3	1
8.14417	143	1	1	1	1	1	1	1	1	1	1	1		1	1	1	1	1	1	1	1	8.14417	#DIV/0!	143		1	2346	1	1	1	1	391.833	8.14417	0	143		1	1	1	1	1	8.14417	#DIV/0!	143		1	2095	1	1
8.145	93	1	1	1	1	1	1	3434	1	1	1	344.3		1	1	1	1	1	1	1	1	8.145	0	93		1	8254	1	1	1	1	1376.5	8.145	0	93		1	1	4810	1	1203.25	8.145	0	93		1	3286	530	1
8.14583	109	1	1	1	1	1	1	1	1	1	1	1		1	1	360	1	1	51	1	59.4286	8.14583	0	109		1	1	1	1	1	1	1	8.14583	#DIV/0!	109		1	1	1	1	1	8.14583	#DIV/0!	109		1	162	1	14
8.14667	200	1	1	1	1	1	1	50	1	1	1	5.9		1	1	2403	1	1	1	1	344.143	8.14667	0	200		1	7	1	1	1	1	2	8.14667	0	200		1	1	1	1	1	8.14667	0	200		1	91	1	1
8.1475	86	1	1	1	1	1	1	1	1	1	1	1		1	1	1	1	1	1137	1	163.286	8.1475	0	86		1	1	1	1	20704	1	3451.5	8.1475	0	86		1	1	1	1	1	8.1475	#DIV/0!	86		1	1	1	1
8.14833	72	1	196	1	1	1	1	60250	1	1	1	6045.4		1	1	1365	1	1	1	1	195.857	8.14833	0	72		1	4459	1	1	43582	1	8007.5	8.14833	0	72		1	1	79222	1	19806.2	8.14833	0	72		1	43535	1	1
8.14917	102	1	73	1	1	1	1	53288	1	1	1	5336.9		1	1	657	1	1	1	1	94.7143	8.14917	0	102		1	1	1	1	36800	1	6134.17	8.14917	0	102		1	1	57045	1	14262	8.14917	0	102		1	38569	1	1
8.15	128	1	1	1	1	1	1	1	1	1	1	1		1	1	361	1	1	1	1	52.4286	8.15	0	128		1	1868	1	1	1335	1	534.5	8.15	0	128		1	1	1	1	1	8.15	#DIV/0!	128		1	1	1	1
8.15083	239	1	1	1	1	1	1	1	1	1	1	1		1	1	1	1	1	1	1	1	8.15083	#DIV/0!	239		1	1	1	1	1	1	1	8.15083	#DIV/0!	239		1	1	1	1	1	8.15083	#DIV/0!	239		1	11	1	1
8.15167	127	1	1	1	1	1	1	1	10	1	1	1.9		1	1	1	1	1	1	1	1	8.15167	0	127		1	1	1	1	1	1	1	8.15167	0	127		1	1	1	1	1	8.15167	0	127		1	1	1	1
8.1525	173	1142	2157	1409	1	1	1276	397	843	743	1	797		1	1	1	1	1	390	1	56.5714	8.1525	-740.429	173		1	1211	1	1	869	8	348.5	8.1525	0	173		452	1	789	1	310.75	8.1525	0	173		1	357	952	3217
8.15333	146	552	1057	416	1	1	522	1	359	286	1	319.6		1	1	1	173	1	104	326	86.7143	8.15333	0	146		1	12747	1	1	9651	1	3733.67	8.15333	0	146		7788	1	255	1	2011.25	8.15333	0	146		1	1	10412	1341
8.15417	79	1	1	1	1	1	1	69831	1	1	1	6984		1	81281	1	370	1	48322	1	18568.1	8.15417	0	79		1	1	1	1	48080	1	8014.17	8.15417	0	79		1	1	29413	1	7354	8.15417	0	79		1	35877	32168	1
8.155	259	1	1	1	1	1	1	1	90	1	1	9.9		1	1	1	1	1	1	1	1	8.155	0	259		1	1	1	1	1	1	1	8.155	0	259		1	1	1	1	1	8.155	0	259		1	1	3	1
8.15583	161	1	1	1	1	1	1	62664	1	1	1	6267.3		1	1	4913	1	1	1	5542	1494.29	8.15583	0	161		1	67769	1	1	46422	1	19032.5	8.15583	0	161		38587	1	59046	1	24408.8	8.15583	0	161		1	48659	52666	1
8.15667	132	1	136	1	1	1	1	68889	1	60	1	6909.2		1	1	246	1	1	1	105	50.8571	8.15667	0	132		1	66289	1	1	49822	1	19352.5	8.15667	0	132		42498	1	63659	1	26539.8	8.15667	0	132		1	52023	56005	431
8.1575	75	4052	1	998	1	1	1	1	1	1653	1	671		1	1	1	1	1	9582	86736	13760.4	8.1575	0	75		1	482321	1	1	341353	1	137280	8.1575	0	75		192411	1	97525	1	72484.5	8.1575	71813.5	75		1	1	390364	4511
8.15833	147	58184	1	1	1	1	41909	1	37629	1	1	13772.9		1	1	1	1	1	1	1107	159	8.15833	0	147		1	145304	1	1	18042	3244	27765.5	8.15833	0	147		60394	1	35185	1	23895.2	8.15833	0	147		1	1	16462	1
8.15917	86	1243	1060	768	1	1	400	867	765	673	537	631.5		1	975	1	3034	1	67	364	634.714	8.15917	0	86		1	31216	1	1	1	285	5250.83	8.15917	0	86		6263	1	1	1	1566.5	8.15917	0	86		1	985	24355	507
8.16	130	175	1358	1	1	1	191	1	67	73	1	186.9		1	189	43	1	1	1	1	33.8571	8.16	0	130		1	110121	1	1	80347	1	31745.3	8.16	0	130		70192	1	1	1	17548.8	8.16	0	130		1	1	89812	340
8.16083	60	197	224	1	1	1	1	1	1	1	55	48.3		1	1	1	226	1	1	1949	311.429	8.16083	0	60		1	40456	1	1	30193	1	11775.5	8.16083	0	60		23673	1	20624	1	11074.8	8.16083	11026.5	60		1	1	35009	1
8.16167	117	12396	1	10378	1	1	5194	5937	11947	11887	5339	6308.1		1	12215	1	23905	1	18980	1	7872	8.16167	0	117		1	122816	1	1	69831	1	32108.5	8.16167	0	117		59246	1	33657	1489	23598.2	8.16167	0	117		1	1	81026	286
8.1625	72	1128	1667	621	1	1	636	1	739	253	404	545.1		1	558	2133	1119	1	1	595	629.714	8.1625	0	72		1	62000	1	1	1	43	10341.2	8.1625	0	72		33714	1	1	1	8429.25	8.1625	0	72		1	1	47364	26
8.16333	131	802	1	209	1	1	1	1	1	1	1	101.9		1	1	1	1	1	1	1	1	8.16333	0	131		1	6724	1	1	4290	1	1836.33	8.16333	0	131		1349	1	1	1	338	8.16333	0	131		1	1	2277	1
8.16417	155	1	1	1	1	1	1035	1	1263	1	1	230.6		1	16128	91	1	1	8344	10568	5019.14	8.16417	4788.54	155		1	11994	1	1	8507	1	3417.5	8.16417	0	155		1	1	18389	10669	7265	8.16417	7034.4	155		1	1	9812	1
8.165	101	130	1	1034	1	1	1	55	176	98	441	193.8		1	194	895	1482	1	70	7359	1428.86	8.165	0	101		1	51192	1	1	34633	1	14304.8	8.165	0	101		26830	1	1	1	6708.25	8.165	0	101		1	1	38352	1
8.16583	116	294	1	113	1	1	1	54261	112	1	1	5478.6		1	1	1911	423	1	1	1	334.143	8.16583	0	116		1	59709	1	1	38411	1	16354	8.16583	0	116		1	1	53775	101	13469.5	8.16583	0	116		1	40436	43902	1
8.16667	104	27	1	1	1	1	1	53	1	1	43	13		1	38	1	268	1	1	1988	328.286	8.16667	0	104		1	14157	1	1	9536	1	3949.5	8.16667	0	104		5938	1	1	1	1485.25	8.16667	0	104		1	1	10268	1
8.1675	175	2470	1934	1649	1	1	1879	80	1838	1546	800	1219.8		1	1022	16	4611	1	1	1	807.571	8.1675	0	175		1	526761	1	1	385256	1395	152236	8.1675	0	175		421490	1	1	1	105373	8.1675	0	175		1	1	428925	4552
8.16833	176	310	179	184	162	1	89	1	188	155	84	135.3		1	103	577	608	1	1	1	184.571	8.16833	0	176		1	73849	1	100	53616	208	21295.8	8.16833	0	176		54272	1	1	1	13568.8	8.16833	0	176		1	1	59626	498
8.16917	186	1	1	1	1	1	1	1	6	1	75	8.9		1	162	1	1	1	192	1	51.2857	8.16917	0	186		1	277	1	1	200	1	80.1667	8.16917	0	186		1	1	244	100	86.5	8.16917	0	186		1	215	265	73
8.17	122	209	1	169	1	1	1	1	197	122	43	74.5		1	76	1	235	1	6	1	45.8571	8.17	0	122		1	430	1	1	176	1	101.667	8.17	0	122		133	1	366	11	127.75	8.17	0	122		1	44	199	321
8.17083	188	1	1	1	1	1	21	1	1	1	1	3		1	1	1	1	1	1	1	1	8.17083	0	188		1	156	1	1	95	1	42.5	8.17083	0	188		1	1	96	1	24.75	8.17083	0	188		1	1	235	1
8.17167	192	1	1	1	1	1	1	7	1	1	1	1.6		1	1	1	1	1	1	1	1	8.17167	0	192		1	1	1	1	1	1	1	8.17167	0	192		1	1	1	1	1	8.17167	0	192		1	1	160	1
8.1725	185	1	1	124	1	1	3	1	90	7	81	31		1	1	1	12	1	67	41	17.7143	8.1725	0	185		1	110	1	1	118	1	38.6667	8.1725	0	185		101	1	212	103	104.25	8.1725	0	185		1	88	1	185
8.17333	123	1	1	1	1	1	1	1	1	1	1	1		1	1	1	1	1	108	12	17.8571	8.17333	0	123		1	449	1	1	270	1	120.5	8.17333	0	123		432	1	69	1	125.75	8.17333	0	123		1	294	251	1
8.17417	64	1	1	1	1	1	1	1	1	1	1	1		1	1	1	1	1	1	1	1	8.17417	#DIV/0!	64		1	7552	1	1	4929	1	2080.83	8.17417	0	64		9803	1	81	32	2479.25	8.17417	0	64		1	49	5370	1
8.175	97	1	1	1	1	1	1	99	1	1	1	10.8		1	1	112	1	1	753	433	186	8.175	0	97		1	1	1	1	931	1	156	8.175	0	97		1	1	1891	946	709.75	8.175	698.95	97		1	162	1121	1
8.17583	87	1	1	1	1	1	1	1	1	1	125	13.4		1	1	1	1	1	1	663	95.5714	8.17583	0	87		1	6618	1	1	1107	145	1312.17	8.17583	0	87		1098	1	11495	98	3173	8.17583	0	87		1	4879	1	3430
8.17667	140	1	1	92	1	1	1	1	9	1	1	10.9		1	136	1	1	1	87	1	32.5714	8.17667	0	140		1	192	1	1	103	1	49.8333	8.17667	0	140		107	1	244	62	103.5	8.17667	92.6	140		1	154	85	1
8.1775	237	1	8	126	1	1	1	1	1	1	1	14.2		1	1	1	174	1	1	1	25.7143	8.1775	0	237		1	1	1	1	1	1	1	8.1775	0	237		1	1	1	1	1	8.1775	0	237		1	1	1	534
8.17917	93	1	1	1	1	1	1	1	1	1	1	1		1	1	1	1	1	1	1	1	8.17917	#DIV/0!	93		1	12934	1	1	1534	1	2412	8.17917	0	93		1	1	1	1	1	8.17917	#DIV/0!	93		1	1	1	1
8.18083	236	1	462	466	1	1	376	601	445	1	847	320.1		1	560	1	89	1	1	1	93.4286	8.18083	0	236		1	500	1	1	1	1	84.1667	8.18083	0	236		1	1	657	1	165	8.18083	0	236		1	537	47	1056
8.18167	162	1	94	1	1	1	1	1	1	1	1	10.3		1	1	243	1	1	1	395	91.8571	8.18167	0	162		1	24757	1	1	17271	1	7005.33	8.18167	0	162		15881	1	1	1	3971	8.18167	0	162		1	1	19426	298
8.18333	73	1	1	9715	1	1	1	1	15393	1	1	2511.6		1	1	1	56339	1	16315	41683	16334.4	8.18333	0	73		1	467898	1	1	329469	4577	133658	8.18333	0	73		146391	1	1	1053	36861.5	8.18333	0	73		1	1	373772	1
8.18417	177	1	1	77	1	1	1	24728	1	53	1	2486.5		1	28	1	1	1	1	1	4.85714	8.18417	0	177		1	25478	1	1	18510	1	7332	8.18417	0	177		19584	1	20143	1	9932.25	8.18417	0	177		1	19366	20310	1
8.185	141	1	1	48	181	1	9	1	1	70	1	31.4		1	9	344	142	1	22	1	74.2857	8.185	0	141		1	1054	1	1	116	1	195.667	8.185	0	141		280	1	1	1	70.75	8.185	0	141		1	1	125	1
8.18583	271	1	1	1	1	1	1	78	78	1	1	16.4		1	1	42	1	1	1	1	6.85714	8.18583	0	271		1	1	1	1	1	1	1	8.18583	0	271		1	1	1	1	1	8.18583	0	271		1	27	3	1
8.18667	207	71	806	1	1	1	1	1	1	1	1	88.5		1	91	1	122	1	107	1	46.2857	8.18667	0	207		1	94	1	1	1	1	16.5	8.18667	0	207		1	1	22	1	6.25	8.18667	0	207		1	108	29	1827
8.1875	196	1	1	1	1	1	1	58	1	1	1	6.7		1	1	6818	1	1	1	1	974.857	8.1875	0	196		1	152	1	1	57	1	35.5	8.1875	0	196		1	1	14	1	4.25	8.1875	0	196		1	153	30	1
8.18833	160	121	1	1	1	1	1	517101	1	1	1	51723		1	1	1	1	1	1	35	5.85714	8.18833	0	160		1	556684	1	1	388152	1	157473	8.18833	0	160		358246	1	496858	1	213776	8.18833	0	160		1	404459	432816	1
8.18917	422	1	1	1	1	1	1	1	82	1	1	9.1		1	1	1	1	1	10	1	2.28571	8.18917	0	422		1	1	1	1	1	1	1	8.18917	0	422		1	1	1	1	1	8.18917	0	422		1	1	1	1
8.19	260	1	1	1	1	1	47	1	84	1	2	14		1	1	1	1	1	50	1	8	8.19	0	260		1	231	1	1	311	1	91	8.19	0	260		1	1	198	1	50.25	8.19	0	260		1	324	1	1
8.19083	84	1	1	66	1	1	1	41460	24	1	1	4155.7		71	1	666	182	1	1	1	131.857	8.19083	0	84		1	49448	1	1	30796	1	13374.7	8.19083	0	84		20297	1	55152	1	18862.8	8.19083	0	84		1	30884	35307	1
8.19167	107	243	1626	1	1	90	1	1	349	1	1	231.4		1	1	1	3161	362	1	1059	655.143	8.19167	0	107		1	1	130	1	1	1	22.5	8.19167	0	107		1455	1	1	1	364.5	8.19167	0	107		1	1	1	5721
8.1925	167	1	1	1	1	1	1	69	69	1	100	24.5		1	13	1	1	1	11	1	4.14286	8.1925	0	167		1	381	1	1	561	1	157.667	8.1925	0	167		1	1	1	1	1	8.1925	0	167		1	1	1	1
8.19333	200	1	1	1	1	1	1	1	1	1	1	1		1	6	1	1	1	36	1	6.71429	8.19333	0	200		1	1	1	1	1	1	1	8.19333	#DIV/0!	200		1	1	1	1	1	8.19333	#DIV/0!	200		1	1	1	1
8.19417	166	1	1	1	1	1	1	150	1	1	1	15.9		1	1	48	1	1	1	1	7.71429	8.19417	0	166		1	1	1	1	1	1	1	8.19417	0	166		1	1	100	51	38.25	8.19417	0	166		1	60	1	1
8.19583	116	2	1	136	233	99	1	1	1	165	1	64		1	1	1	1	1	1	2033	291.286	8.19583	0	116		1	1	1	1	1	10	2.5	8.19583	0	116		29806	1	1	1	7452.25	8.19583	0	116		1	1	1	1
8.19667	323	1	1	1	1	1	1	1	86	1	1	9.5		1	1	1	1	1	34	1	5.71429	8.19667	0	323		1	35	1	24	15	1	12.8333	8.19667	0	323		1	1	1	1	1	8.19667	0	323		1	12	19	1
8.1975	516	1	1	1	1	1	1	1	1	1	1	1		1	1	1	1	1	1	1	1	8.1975	#DIV/0!	516		1	1	1	1	1	1	1	8.1975	#DIV/0!	516		1	1	1	3	1.5	8.1975	0	516		1	1	1	1
8.19833	69	1	2410	808	1	411	2680	1	816	156	1	728.5		40	1	2807	1	90	1	1	420.143	8.19833	0	69		1	3040	382	30	1	1341	799.167	8.19833	0	69		7793	1	1	1	1949	8.19833	0	69		1	1	7316	1
8.19917	146	1	1	1	1	1	1	1	1	1	185	19.4		1	407	459	1	143	274	1	183.714	8.19917	164.314	146		1	1	1	1	1	1	1	8.19917	0	146		1	1	1	1	1	8.19917	0	146		1	105	1	1
8.2	156	1692	1	1741	3242	656	1528	864	1293	1306	456	1277.9		1003	2001	1	2975	1	975	1257	1173.29	8.2	0	156		1	1553	1965	1477	1128	2143	1377.83	8.2	0	156		1	1	2446	1271	929.75	8.2	0	156		1	967	1229	333
8.20083	155	16123	13491	13898	26065	7322	12639	8065	10821	10972	4022	12341.8		7722	1	1	23735	1	632	1	4584.71	8.20083	-7757.09	155		8780	1	14156	11770	1	16660	8561.33	8.20083	0	155		155	1	1	1	39.5	8.20083	-12302.3	155		1	7878	1	1
8.20167	70	1550	538	1345	1	1	1	1	1	606	1	404.5		570	1549	3535	224	1	607	319	972.143	8.20167	0	70		1	22612	1	1	1	29	3774.17	8.20167	0	70		13985	1	3206	1	4298.25	8.20167	0	70		1	1025	14724	1
8.2025	80	1352	18321	1114	2020	567	1128	255	1	222	161	2514.1		186	1022	1	24203	13	1	9557	4997.57	8.2025	0	80		104	1	431	881	1	421	306.5	8.2025	0	80		1	1	1	1	1	8.2025	0	80		1	253	1	42050
8.20333	131	125	1	1	1	1	713	1	1	1	1	84.6		1	1	472	976	112	1	303	266.571	8.20333	0	131		1	1	1	1	1	212	36.1667	8.20333	0	131		1	1	156	1	39.75	8.20333	0	131		1	1	1	2507
8.20417	88	86	160	1	1	1	45	67	1	1	66	42.9		1	1	1	1	1	1	1693	242.714	8.20417	0	88		1	1	1	1	1	40	7.5	8.20417	0	88		10981	1	1	1	2746	8.20417	0	88		1	1	1	1291
8.205	104	227	4303	1	1	116	186	1	1	131	746	571.3		1	1	793	5258	1	1	1	865.143	8.205	0	104		1	1	275	162	134	1	95.6667	8.205	0	104		1	1	1	1	1	8.205	0	104		1	1	1	7212
8.20583	134	32	1	1	1	1	1	1	1	1	1	4.1		1	1	216	1	1	1	1	31.7143	8.20583	0	134		1	1	1	1	311	1	52.6667	8.20583	0	134		1	1	1	1	1	8.20583	0	134		1	1	73	1
8.20667	75	26308	1	25294	1	1	13702	5403	14324	12603	3435	10107.2		4871	17924	74285	1	1	1	1	13869.1	8.20667	0	75		1	1	1	1	1	1	1	8.20667	-10106.2	75		1	1	1	1	1	8.20667	0	75		1	1	1	1
8.2075	91	329	1	1	1	1	1	1	1	1	1	33.8		1	1	1632	1	1	1	3708	763.571	8.2075	0	91		1	1	1	1	8259	423	1447.67	8.2075	0	91		1296	1	1	1	324.75	8.2075	0	91		1	1	6212	16696
8.20833	60	593	4145	3895	676	171	164	1	1	101	1	974.8		52	1	2528	3931	1958	36	1	1215.29	8.20833	0	60		52	1691	514	680	1	533	578.5	8.20833	0	60		1	852	4096	1948	1724.25	8.20833	0	60		1	1	1646	5663
8.20917	105	1	1907	1	1	1	14	1	1	1	1	192.9		1	1	1	2656	1	1	1080	534.429	8.20917	0	105		1	1	17	1	1	67	14.6667	8.20917	0	105		1	1	1	1	1	8.20917	0	105		1	1	1	3998
8.21	152	1	79	68	1	1	8	482	10	13	1	66.4		1	1	1	1	1	58	1	9.14286	8.21	0	152		1	520	1	1	309	1	138.833	8.21	0	152		430	1	345	1	194.25	8.21	0	152		1	364	355	16
8.21083	79	76715	58680	1	3306	3207	13480	1	1	1	28646	18403.8		1	1	1	1	1	1	38291	5471	8.21083	0	79		1	46692	37	1	1	1	7788.83	8.21083	0	79		54924	1	1	1	13731.8	8.21083	0	79		1	1	1	177734
8.21167	77	1	43749	1	1	7277	1	1	1	1	489	5152.2		1	1	2913	52404	1	1	1	7903.14	8.21167	0	77		1	1	1	1	1	1	1	8.21167	0	77		48510	1	1	1	12128.2	8.21167	0	77		1	1	13621	99287
8.2125	83	1	562	1	971	194	1	256	1	176	110	227.3		103	1	632	666	1	1	1	200.714	8.2125	0	83		230	1	565	700	184	698	396.333	8.2125	0	83		1	1	1	1	1	8.2125	0	83		1	1	1	1245
8.21333	186	1	57	266	230	153	173	183	157	209	1	143		133	1	522	270	1	1	220	164	8.21333	0	186		119	50	151	242	304	264	188.333	8.21333	0	186		127	1	1	1	32.5	8.21333	0	186		1	30	1	100
8.21417	113	1561	1140	1535	2441	1080	1	602	1894	1073	401	1172.8		474	1012	5787	1903	1	1	1	1311.29	8.21417	0	113		252	1158	1062	2041	3556	2395	1744	8.21417	0	113		1754	1	1	4415	1542.75	8.21417	0	113		1	417	4359	2928
8.215	89	3508	1	1	226	1	1	1	1	1898	1	563.9		701	1	1	3205	1	411	1168	784	8.215	0	89		278	10367	673	824	6416	1056	3269	8.215	0	89		4595	1	39806	1247	11412.2	8.215	0	89		1	17679	6125	4618
8.21583	171	710	1	668	894	599	1	1	618	541	1	403.4		173	1	1	1	1	1	1	25.5714	8.21583	-377.829	171		721	1	702	1159	1	749	555.5	8.21583	0	171		1	1	1	1	1	8.21583	-402.4	171		1	1	1	2053
8.21667	71	1	1	1	1	148	1	1	1	1	1	15.7		1	1	1	742	1	1	1	106.857	8.21667	0	71		1	1	174	1	1	1	29.8333	8.21667	0	71		1	1	1	1	1	8.21667	0	71		1	1	1	9893
8.2175	148	1	2065	1	132	406	1	1	1394	1	112	411.4		1	1	758	2078	1	1	229	438.429	8.2175	0	148		1	23097	1	1	4308	320	4621.33	8.2175	0	148		10965	1	4876	1	3960.75	8.2175	3549.35	148		1	1	1587	1
8.21833	181	1	1	1	1	1	42	1	48	1	24	12.1		41	53	1	1	1	99	1	28.1429	8.21833	0	181		1	1	1	1	1	71	12.6667	8.21833	0	181		1	1	1	1	1	8.21833	0	181		1	1	1	1
8.21917	211	1	775	1	144	1	1	1	9	1	52	98.6		1	100	1	307	1	54	245	101.286	8.21917	0	211		1	1	1	129	1	1	22.3333	8.21917	0	211		1	1	1	1	1	8.21917	0	211		1	1	1	1754
8.22	196	1	1	1	1	1	1	1	1	1	1	1		1	1	1	1	1	1	5176	740.286	8.22	0	196		95	1	15	1	1	1	19	8.22	0	196		170	1	1	58	57.5	8.22	56.5	196		1	1	1	1
8.22083	253	1	10	1	1	35	1	1	1	1	1	5.3		1	1	1	1	1	1	1	1	8.22083	0	253		1	1	1	1	1	1	1	8.22083	0	253		1	1	1	1	1	8.22083	0	253		1	1	1	109
8.22167	154	1	1	1	1	1	52	1	1	45	1	10.5		27	1	1	1	1	56	1	12.5714	8.22167	0	154		1	1	1	1	1	59	10.6667	8.22167	0	154		1	1	1	1	1	8.22167	0	154		1	1	1	1
8.2225	388	1	1	1	1	4	1	1	1	1	1	1.3		1	1	1	1	1	1	1	1	8.2225	0	388		1	1	1	1	4	1	1.5	8.2225	0	388		1	1	1	1	1	8.2225	0	388		1	1	1	1
8.22333	274	1	201	170	108	1	146	4	131	93	44	89.9		88	123	1	135	1	253	1	86	8.22333	0	274		13	38	54	76	1	151	55.5	8.22333	0	274		36	1	68	24	32.25	8.22333	0	274		1	1	1	11
8.22417	580	1	1	1	1	1	1	76	1	1	1	8.5		1	1	1	1	1	1	1	1	8.22417	0	580		1	1	1	1	1	1	1	8.22417	0	580		1	1	1	1	1	8.22417	0	580		1	1	1	1
8.225	225	1	170	136	1	1	140	155	176	1	86	86.7		1	1	1	268	1	1	1	39.1429	8.225	0	225		1	167	1	1	82	93	57.5	8.225	0	225		1	1	1	1	1	8.225	0	225		1	109	7	348
8.22583	143	19336	10349	1	16342	10036	1	1	1	11049	1	6711.7		7034	1	88548	16942	1	1	1	16075.4	8.22583	0	143		10733	1	9742	16067	51499	7314	15892.7	8.22583	0	143		24430	1	1	67153	22896.2	8.22583	0	143		1	1	62121	22391
8.22667	350	1	1	1	1	1	1	98	60	1	18	18.3		1	1	25	1	1	1	1	4.42857	8.22667	0	350		1	1	1	1	13	1	3	8.22667	0	350		1	1	36	3	10.25	8.22667	0	350		1	1	1	1
8.2275	173	1	1	1	1	1	1	633	1	1	1	64.2		1	1	1	1	767	1	1	110.429	8.2275	0	173		1	1	1	1	435	1	73.3333	8.2275	0	173		1	1	1272	738	503	8.2275	0	173		1	633	1	1
8.22833	91	1	6332	1	1	1	1	1	1	1	1	634.1		1	1	1	8833	1	1137	1	1425	8.22833	0	91		1	1	1	1	1	1	1	8.22833	0	91		1	1	1	1	1	8.22833	0	91		1	1	1	1
8.22917	133	1	1218	1	1	1	1	1	1	1	1	122.7		20	1	1112	1	1	1	1	162.429	8.22917	0	133		1	1	1	50	3647	1	616.833	8.22917	0	133		1	1	1	1	1	8.22917	0	133		1	1	2517	2891
8.23	102	1	1147	1	1	12	1	1	118	1	49	133.2		1	1	1	1133	1	1	1	162.714	8.23	0	102		1	1	1	1	1	1	1	8.23	0	102		1	1	1	1	1	8.23	0	102		1	1	1	1796
8.23083	66	1	1	1	1	255	1	1	1	1	1	26.4		1	1	312	5080	267	20703	605	3852.71	8.23083	0	66		1	26486	1	1	1	1	4415.17	8.23083	0	66		1	1	1	1	1	8.23083	0	66		931	1948	1	13774
8.23167	384	1	1	1	1	1	1	1	84	1	1	9.3		1	1	1	1	1	1	1	1	8.23167	0	384		1	1	1	1	3	1	1.33333	8.23167	0	384		1	1	1	1	1	8.23167	0	384		1	1	1	1
8.2325	147	35446	1	1	1	1	34970	1	29599	1	1	10002.2		1	1	4887	1	1	1	1	699	8.2325	0	147		1	1	1	1	1	1	1	8.2325	0	147		1	1	1	1	1	8.2325	0	147		1	1	1	1
8.23333	88	1	3084	1	1	1	1	1	1	1	1	309.3		1	1	1	3241	1	1	1	463.857	8.23333	0	88		1	1	1	1	1	1	1	8.23333	0	88		158	1	1	1	40.25	8.23333	0	88		1	1	1	4663
8.23417	75	1	106320	131261	29395	8482	1	1	1	83107	1	35857		1	1	1	138635	58336	1	1	28139.4	8.23417	0	75		12204	53670	19483	19179	40732	14556	26637.3	8.23417	0	75		1	28065	130270	53479	52953.8	8.23417	0	75		1	1	47667	149885
8.235	87	1	1	1	532	257	1	1	1	1	1	79.7		85	1	935	1	1	1	1	146.429	8.235	0	87		1	1	455	296	1	229	163.833	8.235	0	87		1	1	1	1	1	8.235	0	87		1	1	1	2926
8.23583	161	1	6691	7060	1	1	1	1	1	1	102	1386		1	1	1	7518	1	8	1	1075.86	8.23583	0	161		1	1	1	1	1	1	1	8.23583	0	161		1	1	1	1	1	8.23583	0	161		1	1	1	8241
8.23667	135	1	1	1	1	1	1	1	1	1	1	1		1	1	1	1	1	1	1	1	8.23667	#DIV/0!	135		1	1	1	1	1	21	4.33333	8.23667	0	135		437	1	1	1	110	8.23667	0	135		1	1	1	240
8.2375	152	1	1	1	1	13	1	1	1	1	1	2.2		8	1	1	1	1	103	1	16.5714	8.2375	0	152		1	1	1	1	1	63	11.3333	8.2375	0	152		1	1	1	1	1	8.2375	0	152		1	1	1	1
8.23833	70	1	1668	111	2045	365	1	1	1	1	1	419.5		1	1	1	1295	1	1	1	185.857	8.23833	0	70		180	1	760	1284	1	539	460.833	8.23833	0	70		87	1	1	688	194.25	8.23833	0	70		1	1	537	1609
8.23917	73	1	63904	66700	42528	29637	1	1	1	19499	1	22227.3		11466	1	147606	59153	1	1	28281	35215.6	8.23917	0	73		1	1	28004	58956	64866	29483	30218.5	8.23917	0	73		1	1	1	95647	23912.5	8.23917	0	73		1	12101	76811	123106
8.24	527	1	1	1	1	1	1	1	1	1	1	1		1	1	1	1	1	1	1	1	8.24	#DIV/0!	527		1	1	1	1	1	2	1.16667	8.24	0	527		47	1	1	1	12.5	8.24	0	527		1	1	10	1
8.24083	199	1	1	1	1	1	1	1	1	1	1	1		29	1	1	1	1	3	46	11.7143	8.24083	0	199		1	84	1	1	25	17	21.5	8.24083	0	199		33	1	66	32	33	8.24083	32	199		1	1	32	1
8.24167	484	1	1	1	1	6	1	1	1	15	1	2.9		1	1	1	35	1	1	1	5.85714	8.24167	0	484		1	1	1	1	1	1	1	8.24167	0	484		1	1	1	1	1	8.24167	0	484		1	1	1	1
8.2425	130	1	38	61	1	1	1	7	1	1	1587	169.9		1	3109	2397	1	1933	2173	1	1373.57	8.2425	1203.67	130		1	1932	1	1	1550	1	581	8.2425	0	130		1	1819	4597	1717	2033.5	8.2425	1863.6	130		4072	1225	1567	1710
8.24333	129	1	1387	1796	740	697	1	1	1	1006	1	563.1		474	1	7704	1	6426	7299	1	3129.43	8.24333	0	129		97	4844	527	1033	4364	647	1918.67	8.24333	0	129		1822	2768	12081	5745	5604	8.24333	5040.9	129		1	1	5092	3357
8.24417	169	1	1	94	80	1	39	57	1	28	60	36.2		8	71	76	90	1	58	1	43.5714	8.24417	0	169		61	75	57	15	1	271	80	8.24417	0	169		26	4	13	1	11	8.24417	0	169		1	43	6	1
8.245	96	339	1	1	1	1	583	1	829	1	416	217.3		1	963	25	1	951	735	631	472.429	8.245	0	96		1	478	1	1	314	1	132.667	8.245	0	96		498	52	758	480	447	8.245	0	96		1	712	372	351
8.24583	64	1	5382	91	1	1	1	1	1	1	1	548.1		1	1	1245	6871	1	1348	2193	1665.71	8.24583	0	64		1	1	1	1	516	1	86.8333	8.24583	0	64		139	1	1	1	35.5	8.24583	0	64		1	1	1	13262
8.24667	148	1	1	1	1	1	1082	1	1	1	1	109.1		1	1	1	1	1	578	636	174.143	8.24667	0	148		1	17488	1	1	1	1	2915.5	8.24667	0	148		1	1	5005	4659	2416.5	8.24667	2307.4	148		441	1	1	1
8.2475	112	1	356	48	1	1	1	1	1	1	1	41.2		1	1	1	1	1	457	1	66.1429	8.2475	0	112		1	1	1	1	1	1	1	8.2475	0	112		1	75	546	207	207.25	8.2475	0	112		1	1	183	1
8.24833	110	1	1	1	1	315	222	1	1921	1	752	321.6		142	2426	1	217	1539	2129	1872	1189.43	8.24833	867.829	110		1	1322	1	1	1055	112	415.333	8.24833	0	110		1	653	3104	1296	1263.5	8.24833	0	110		3564	1609	1243	99
8.24917	131	1268	1	1016	1	1	879	1	1	1	1	317		281	1	1	571	1	1	1	122.429	8.24917	0	131		872	1	1	680	1	541	349.333	8.24917	0	131		1	256	155	184	149	8.24917	0	131		1	1	1	2826
8.25	497	1	9	1	1	1	1	1	1	1	1	1.8		1	1	1	1	1	1	1	1	8.25	0	497		1	1	1	1	1	11	2.66667	8.25	0	497		1	1	1	32	8.75	8.25	0	497		1	1	1	1
8.25083	172	1	285	1	1	1	1	1	1	1	167	46		1	1	1	1	1	1	1	1	8.25083	0	172		1	1	1	1	90	1	15.8333	8.25083	0	172		1	1	1	188	47.75	8.25083	0	172		1	1	1	1
8.25167	117	48825	40061	43791	1	1	1	1	42452	29212	1	20434.6		1	1	1	49391	1	444	29988	11403.9	8.25167	0	117		1	1	1	1	1	5885	981.667	8.25167	0	117		1	211	3294	1	876.75	8.25167	0	117		1	1	1	83171
8.2525	71	1	1231	412	1	1	1	1431	1908	1	1457	644.4		1	2638	1	1	1061	1377	1692	967.286	8.2525	0	71		354	1162	1	1	473	1	332	8.2525	0	71		1	437	2332	999	942.25	8.2525	0	71		2433	711	1016	1147
8.25333	103	20463	16416	17983	1	1	1	1	1	1	1	5486.9		1	1	735	19296	4804	1	1	3548.43	8.25333	0	103		16667	4687	1	1	2883	1	4040	8.25333	0	103		1	1956	10322	4481	4190	8.25333	0	103		1	5021	1	22771
8.25417	76	11459	1	8173	16020	4693	11665	1	13934	6474	9250	8167		4088	14293	6288	1	1760	8946	4057	5633.29	8.25417	0	76		5715	3128	5617	1	1	4359	3136.83	8.25417	0	76		1776	838	7534	1	2537.25	8.25417	0	76		4305	3432	1	1
8.255	104	4717	1	3918	4682	1	4701	1	5353	3074	3240	2968.8		1769	4970	358	1	742	3829	1109	1825.43	8.255	0	104		2729	392	2386	3341	1	2358	1867.83	8.255	0	104		1	167	1213	462	460.75	8.255	-2508.05	104		836	927	1	1
8.25583	62	7269	1	5798	6695	3325	7154	922	8409	4879	4679	4913.1		2176	6907	269	1	518	5463	1171	2357.86	8.25583	0	62		3107	395	3967	4902	1	3413	2630.83	8.25583	0	62		1	297	725	451	368.5	8.25583	-4544.6	62		637	467	1	1
8.25667	121	133803	1	96766	1	1	122010	1	136649	88469	73557	65125.8		44086	113314	1	1	1	1	1	22486.4	8.25667	0	121		1	1	1	1	1	67964	11328.2	8.25667	0	121		1580	139	1	1	430.25	8.25667	0	121		1	1	1	1
8.2575	79	159357	1	63111	1	1	92834	1	132452	55231	77202	58019.1		22927	1	2178	103396	1	1	14024	20361.1	8.2575	0	79		1	34382	1	1	1	40618	12500.7	8.2575	0	79		1	213	23263	1	5869.5	8.2575	0	79		1050	31293	23086	1
8.25833	65	12676	11523	9270	1	1	12064	965	14192	8235	7698	7662.5		4212	11337	1151	15568	1307	1634	4066	5610.71	8.25833	0	65		1	1	1	1	571	6345	1153.33	8.25833	-6509.17	65		1	564	2270	798	908.25	8.25833	-6754.25	65		1971	1075	771	1
8.25917	175	37	1	10	1	1	1	137	1	1	29	21.9		1	1	1	1	49	88	108	35.5714	8.25917	0	175		1	1	1	1	1	1	1	8.25917	0	175		1	1	1	1	1	8.25917	0	175		1	117	1	1
8.26	105	2564	1	2352	2453	1	2738	1	2185	1531	884	1471		957	274	5281	1	536	2590	1131	1538.57	8.26	0	105		1411	1	1	1	178	1181	462.167	8.26	0	105		1	308	885	313	376.75	8.26	0	105		308	601	1	1
8.26083	66	7339	1	1937	3370	1	1	1	10794	2339	2562	2834.5		517	3634	242	3581	1	1	1	1139.57	8.26083	0	66		1	1	2208	1126	1	1707	840.667	8.26083	0	66		1	1	492	1	123.75	8.26083	0	66		1	1	1	1
8.26167	156	1	1	1	1	1	1	52	1	1	5	6.5		1	1	1	1	1	50	1	8	8.26167	0	156		1	39	1	1	102	1	24.1667	8.26167	0	156		1	1	6	4	3	8.26167	0	156		1	5	66	1637
8.2625	115	1	1630	1794	1	1	1350	1072	1397	608	1	785.5		1	1692	1102	1	866	1243	1559	923.429	8.2625	0	115		1	904	1	1	1	1	151.5	8.2625	0	115		126	392	1902	840	815	8.2625	0	115		1999	1090	1	1637
8.26333	207	895	1315	2525	1376	843	1912	2595	1727	1064	980	1523.2		1402	1604	299	461	2342	1657	1112	1268.14	8.26333	0	207		1280	1147	1068	1563	732	1	965.167	8.26333	0	207		1461	972	1533	1364	1332.5	8.26333	0	207		2321	1602	1051	4152
8.26417	72	1	1	1622	1	1	1	1	1	1	1	163.1		1	4087	1	1	1295	2686	1	1153.14	8.26417	0	72		988	692	1	1	1	434	352.833	8.26417	0	72		1	806	2819	1524	1287.5	8.26417	1124.4	72		2916	1534	1	1
8.265	162	1	142	1	1473	1372	1314	1183	1	1260	2569	931.6		1099	1160	1	1	1	1	1	323.429	8.265	0	162		868	604	640	861	1	558	588.667	8.265	0	162		1	1467	1	1	367.5	8.265	0	162		744	382	1	1
8.26583	237	1	1	1	1	123	54	1	128	140	280	73		64	344	16	1	10	129	1	80.7143	8.26583	0	237		69	6	71	143	1	69	59.8333	8.26583	0	237		29	1	162	179	92.75	8.26583	0	237		224	104	1	1
8.26667	108	1	3552	3796	1	1	1	1	1	1	1	735.6		1	1	1	5024	1	265	46	762.714	8.26667	0	108		1	1	1	1	1	1	1	8.26667	0	108		1	1	1	1	1	8.26667	0	108		1	1	1	3330
8.2675	241	1	81	1	1	13	1	41	47	63	107	35.6		1	103	1	1	1	45	1	21.8571	8.2675	0	241		1	1	12	1	1	7	3.83333	8.2675	0	241		1	1	12	45	14.75	8.2675	0	241		1	4	1	150
8.26833	231	1	1	1	1	1	1	19	1	1	1	2.8		1	1	1	1	1	1	1	1	8.26833	0	231		17	1	1	1	1	1	3.66667	8.26833	0	231		1	1	1	1	1	8.26833	0	231		1	1	1	1
8.26917	197	1	1122	1	1	1	1	48	1	1	1	117.8		1	1	1	1569	1	82	1	236.571	8.26917	0	197		1	44	1	1	1	6	9	8.26917	0	197		1	1	1	1	1	8.26917	0	197		1	5	36	1
8.27	147	30869	1	1	1	2159	1	1	25243	1	7834	6611.1		1	1	1744	1	1	22069	4670	4069.57	8.27	0	147		1	134846	1	678	1	1	22588	8.27	0	147		1	1	34822	20835	13914.8	8.27	0	147		5830	1	16339	1
8.27083	254	1	1	1	1	1	1	1	1	1	1	1		1	1	1	1	43	1	1	7	8.27083	0	254		1	1	1	1	1	1	1	8.27083	#DIV/0!	254		1	1	1	22	6.25	8.27083	0	254		1	1	1	38
8.27167	287	1	1	1	1	1	1	1	1	1	1	1		1	33	1	1	1	1	1	5.57143	8.27167	0	287		1	22	1	1	1	1	4.5	8.27167	0	287		1	1	1	4	1.75	8.27167	0	287		1	1	1	1
8.2725	170	1	1	7	1	1	1	49	1	1	1	6.4		1	1	1	1	1	1	1	1	8.2725	0	170		1	1	1	1	63	1	11.3333	8.2725	0	170		1	1	1	1	1	8.2725	0	170		1	1	1	2346
8.27333	163	127	241	302	1	1	1	1	717	1	581	197.3		1	975	1	270	1166	853	678	563.429	8.27333	0	163		264	652	1	322	413	1	275.5	8.27333	0	163		791	1	867	621	570	8.27333	0	163		1	715	580	228
8.27417	178	1	1	395	1	1	212	394	118	66	37	122.6		204	160	14	1	432	223	215	178.429	8.27417	0	178		1	234	1	1	126	1	60.6667	8.27417	0	178		144	197	336	222	224.75	8.27417	0	178		287	245	164	1
8.275	118	1	1	1	5643	2781	5341	1	6390	4338	3987	2848.4		2815	6692	1	1	965	5657	820	2421.57	8.275	0	118		5097	574	3860	4387	1	3225	2857.33	8.275	0	118		84	295	1157	604	535	8.275	0	118		825	1	1	1
8.27583	123	25	168	294	458	229	448	105	499	302	295	282.3		150	444	1	1	94	283	1	139.143	8.27583	0	123		259	33	276	390	1	186	190.833	8.27583	0	123		1	1	130	29	40.25	8.27583	-242.05	123		334	85	1	1
8.27667	191	878	173	4218	1001	1069	2091	3926	1454	1048	711	1656.9		2314	1842	56	1264	3731	1	2279	1641	8.27667	0	191		212	2084	908	1337	1	2440	1163.67	8.27667	0	191		1	2435	1	1765	1050.5	8.27667	0	191		2688	2237	1916	471
8.2775	155	101	1	63	1	1	106	139	164	49	35	66		44	147	1	1	1	1	114	44.1429	8.2775	0	155		1	755	1	1	1455	1	369	8.2775	0	155		1	4	455	279	184.75	8.2775	0	155		259	223	1303	13409
8.27833	193	1521	35	7539	1829	2029	3461	6790	2352	1985	1118	2865.9		4192	3251	1	2180	6715	3593	4049	3425.86	8.27833	0	193		32	3317	1753	2667	1879	4446	2349	8.27833	0	193		2454	2761	4059	3101	3093.75	8.27833	0	193		4798	3757	2891	153
8.27917	75	143363	1	113372	236250	74065	141674	103527	168540	1	118515	109931		61281	186191	106104	116252	1	108738	63411	91711.1	8.27917	0	75		80694	1	104774	126817	1	61796	62347.2	8.27917	0	75		30311	39921	1	1	17558.5	8.27917	-92372.3	75		128657	86475	1	1
8.28	79	1	1	1	74754	38516	1	57380	1	1	1	17065.7		1	151149	1	1	1	114776	1	37990	8.28	0	79		38561	32575	42114	57560	38408	1	34869.8	8.28	0	79		1	1	1	1	1	8.28	0	79		1	1	1	1
8.28167	72	2870	121	2712	4863	1076	2610	3104	3368	1559	2571	2485.4		926	1	771	2670	1	1	2008	911.143	8.28167	-1574.26	72		1153	1	2061	2491	1	1141	1141.33	8.28167	0	72		1	744	2939	1356	1260	8.28167	0	72		1	1	1	660
8.2825	143	117612	1	98320	157766	1	90747	82528	88967	65707	52540	75418.9		42800	119711	1998	1	79284	85112	86887	59399	8.2825	0	143		1	51903	1	1	1	1	8651.33	8.2825	-66767.6	143		1	34569	144374	1	44736.2	8.2825	0	143		167585	62816	1	5506
8.28333	73	163464	44392	190833	265843	1	137525	77303	176069	113549	69822	123880		70523	189737	40674	1	113109	146092	153354	101927	8.28333	0	73		1	90866	1	1	1	1	15145.2	8.28333	-108735	73		1	55540	221473	1	69253.8	8.28333	0	73		273475	102496	1	50316
8.28417	158	950	337	1243	1495	503	946	832	875	809	542	853.2		410	1228	3123	1363	1	1	808	990.571	8.28417	0	158		834	1	827	1137	1439	570	801.333	8.28417	0	158		739	1	1	1	185.5	8.28417	-667.7	158		1335	688	1568	295
8.285	157	2487	1	2409	1	5	1898	1738	2458	1	1272	1227		1	2375	22858	1	1607	1930	1	4110.43	8.285	0	157		1	1491	1	1	1	1	249.333	8.285	0	157		7642	617	3200	1759	3304.5	8.285	0	157		3301	1493	1037	1077
8.28583	109	888	391	1149	1	1	725	650	738	1	383	492.7		1	941	1	1	559	688	464	379.286	8.28583	0	109		1	383	1	1	1	50	72.8333	8.28583	-419.867	109		1	218	1078	476	443.25	8.28583	0	109		1222	542	453	453
8.28667	160	169	49	70	17	6	88	7	132	7	1	54.6		1	1	126	114	1	138	35	59.4286	8.28667	0	160		1	1	1	49	1	9	10.3333	8.28667	0	160		1	1	1	1	1	8.28667	0	160		1	180	1	310
8.2875	89	1	1	2798	1	1725	1	1	1	1	1	453.1		1	1	1	1	1	1	1	1	8.2875	0	89		1	2024	1	1	1	1	338.167	8.2875	0	89		1	1	1	1	1	8.2875	0	89		1	1	1	1
8.28833	176	1	1	301	1	1	1	238	89	1	1	63.5		1	10	1435	1	219	116	452	319.143	8.28833	0	176		1	54	1	1	6	1	10.6667	8.28833	0	176		1	35	69	68	43.25	8.28833	0	176		1	1	1	1
8.28917	94	1	1	1	4419	2443	1	1	1	1	1	687		1	1	1	1	1	4216	1	603.143	8.28917	0	94		2716	1	2935	1	105	1	959.833	8.28917	0	94		1	1	1	1	1	8.28917	0	94		1	1	74	1
8.29	77	1	1	1	40603	1	1	1	1	1	1	4061.2		1	1	1	1	1	1	1	1	8.29	0	77		1	223	1	1	1	1	38	8.29	0	77		1	1	1	1	1	8.29	0	77		1	1	1	1
8.29083	135	1	1	610	199	26	318	602	251	157	235	240		311	292	209	171	592	366	253	313.429	8.29083	0	135		1	305	86	43	219	342	166	8.29083	0	135		1	248	452	336	259.25	8.29083	0	135		489	348	254	1
8.29167	167	1	1	123	1	1	65	135	67	1	34	42.9		9	13	1	1	113	70	15	31.7143	8.29167	0	167		1	1	1	1	4	60	11.3333	8.29167	0	167		1	6	10	68	21.25	8.29167	0	167		27	59	5	1
8.2925	116	1	1	1	4901	1707	1	3294	1	1	2864	1277.2		1	4097	1	427	1	3397	1	1132.14	8.2925	0	116		1	1	2393	1	1	1	399.667	8.2925	0	116		1	1	5592	2477	2017.75	8.2925	0	116		1	2176	1	1
8.29333	105	1	1	1	1	1316	1	1	1	1	1	132.5		1	1	1	1	1	1	1	1	8.29333	0	105		1	1	1539	1	76	1	269.833	8.29333	0	105		1	1	1	1	1	8.29333	0	105		1	1	1	1
8.29417	196	6115	1	6678	1948	2162	3747	733	4076	6537	2997	3499.4		1439	8304	1	1	269	3009	1	1860.57	8.29417	0	196		3239	250	2772	3263	215	2744	2080.5	8.29417	0	196		185	27	161	1	93.5	8.29417	-3405.9	196		319	92	225	5936
8.295	131	513	1	640	1105	245	1	1	1	1	1	250.9		1	1	1107	1	1	1528	1	377.143	8.295	0	131		1	1	303	1	1	1	51.3333	8.295	0	131		342	237	2604	1121	1076	8.295	825.1	131		1	1	1	713
8.29583	168	1	1	1	1	1	1	1	1	1	1	1		1	1	51	547	296	1	1	128.286	8.29583	0	168		1	333	1	1	597	1	155.667	8.29583	0	168		1288	244	1	1	383.5	8.29583	0	168		1	1	610	1
8.29667	187	1	167	171	200	72	133	129	146	123	83	122.5		64	186	1	215	117	150	149	126	8.29667	0	187		112	96	117	160	70	91	107.667	8.29667	0	187		1	52	265	82	100	8.29667	0	187		255	90	88	68
8.2975	144	1	1	1	1	7236	1	1	1	1	1	724.5		1	1	1	17528	1	1	1	2504.86	8.2975	0	144		9981	556	11240	14750	519	7160	7367.67	8.2975	6643.17	144		510	451	1080	92	533.25	8.2975	0	144		1	1	508	1
8.29833	143	1	1	1	1	51568	1	1	1	1	1	5157.7		1	1	1	123586	557	1516	1	17951.9	8.29833	0	143		75120	4488	81154	106324	4764	50292	53690.3	8.29833	48532.6	143		4775	4164	9277	2058	5068.5	8.29833	0	143		1	1	4949	1
8.29917	119	1	1	1	32915	12503	23004	1	1	1	18183	8661.1		14516	30168	1	1	2743	26208	1	10519.7	8.29917	0	119		28846	1911	19000	25498	1	14959	15035.8	8.29917	0	119		10	1337	1	1499	711.75	8.29917	0	119		1	1	447	1
8.30083	97	1	1	1	1	1	1	1	1	1	1	1		1	1	1	1	1	1	1	1	8.30083	#DIV/0!	97		447	137	1	1	151	1	123	8.30083	122	97		150	1	1	89	60.25	8.30083	59.25	97		1	1	121	1
8.30333	274	1	35	8	1	1	1	1	1	1	1	5.1		5	1	1	1	1	1	2	1.71429	8.30333	0	274		1	1	1	1	1	1	1	8.30333	0	274		102	84	1	25	53	8.30333	47.9	274		1	1	99	1
8.30417	175	29	134	1	93	1	1	1	1	1	1	26.3		53	1	1	1	1	1	1	8.42857	8.30417	0	175		1	36	1	1	1	42	13.6667	8.30417	0	175		1	26	1	1	7.25	8.30417	0	175		1	1	1	84
8.305	297	1	1	1	1	1	1	1	1	1	1	1		1	1	1	1	1	1	1	1	8.305	#DIV/0!	297		1	1	1	1	1	1	1	8.305	#DIV/0!	297		1	1	1	30	8.25	8.305	0	297		1	1	1	1
8.30583	139	1	1	1	1	1	1	1	10	1	1	1.9		1	13	15	1	1	1	1	4.71429	8.30583	0	139		1	69	1	1	1	1	12.3333	8.30583	0	139		1	1	12	57	17.75	8.30583	0	139		1	5	1	612
8.30667	153	1	1	1	1	1	1	1	1	1	1	1		1	1	1	1	1	1	1	1	8.30667	#DIV/0!	153		1	1	1	1	1	1	1	8.30667	#DIV/0!	153		134	114	1	23	68	8.30667	67	153		1	1	152	1
8.3075	366	1	1	1	1	1	1	1	1	1	1	1		1	1	1	1	1	1	1	1	8.3075	#DIV/0!	366		1	1	19	1	1	1	4	8.3075	0	366		1	1	1	59	15.5	8.3075	0	366		1	1	1	26
8.30833	220	1	43	1	1	1	1	28	1	1	1	7.9		1	1	1	1	39	23	1	9.57143	8.30833	0	220		1	1	1	1	1	1	1	8.30833	0	220		1	1	51	12	16.25	8.30833	0	220		1	38	1	1
8.30917	199	1	58	74	57	1	4	50	1	50	6	30.2		1	63	1	1	1	47	1	16.4286	8.30917	0	199		46	32	1	69	1	53	33.6667	8.30917	0	199		2	17	1	1	5.25	8.30917	0	199		124	1	6	45
8.31	146	1	439	98	1	1	1	1	1	1	1	54.5		1	1	130	1	391	1	1	75.1429	8.31	0	146		1	491	1	1	454	1	158.167	8.31	0	146		1	1	855	396	313.25	8.31	0	146		282	1	1	1
8.31083	198	1	1	485	164	132	276	44	301	472	227	210.3		90	606	1	1	1	204	1	129.143	8.31083	0	198		226	1	188	232	1	181	138.167	8.31083	0	198		1	1	1	1	1	8.31083	-209.3	198		1	1	31	449
8.31167	89	2684	1	1	1	763	1	1	1	1377	1	483.1		1	1	1	1	1571	4684	11532	2541.57	8.31167	0	89		1	4482	1	1	2257	4516	1876.33	8.31167	0	89		1	2630	5628	1726	2496.25	8.31167	2013.15	89		2509	1	1224	1
8.3125	206	1	217	283	70	51	131	271	89	93	36	124.2		158	131	1	1	246	143	127	115.286	8.3125	0	206		76	147	57	112	99	164	109.167	8.3125	0	206		105	145	177	121	137	8.3125	0	206		185	155	124	1
8.31333	117	1	1	1	57646	19850	33943	36449	1	1	28323	17621.6		23023	47555	21674	1	1	40694	1	18992.7	8.31333	0	117		46625	106	30866	42008	1	22388	23665.7	8.31333	0	117		44	1	61296	29150	22622.8	8.31333	0	117		1	30262	664	1
8.31417	161	1	726	1	1	1	1	6088	1	1	1	682.2		1	1	1	1	4924	1	1742	953	8.31417	0	161		1	5048	1	1	3733	1	1464.17	8.31417	0	161		1917	1	9267	4199	3846	8.31417	0	161		6932	4918	1	1
8.315	103	1	8577	1	1	1	1	1	1	1	1	858.6		1	1	1	1	11036	1	5231	2324.57	8.315	0	103		1	10733	1	1	9917	1	3442.33	8.315	0	103		4180	1	23098	10411	9422.5	8.315	8563.9	103		15157	1	1	1
8.31583	101	1	3677	1	1	1	1	8603	1	1	1	1228.8		1	6285	1	4097	10736	4988	1	3729.86	8.31583	0	101		1	9864	1	1	5337	1	2534.17	8.31583	0	101		2133	2326	19131	10026	8404	8.31583	7175.2	101		17800	7137	1	1
8.31667	61	1	14133	11246	1	10921	1	1	1	1	1	3630.7		1	8763	1	18364	13899	7189	1	6888.29	8.31667	0	61		10709	13184	15226	19070	4288	8743	11870	8.31667	8239.3	61		2870	3845	28173	14647	12383.8	8.31667	0	61		25484	7852	1	1
8.3175	102	1	385	1	1	84	276	950	379	1	1	207.9		1	1010	1	423	1269	545	1	464.286	8.3175	0	102		1	1234	1	1	1	1	206.5	8.3175	0	102		1	141	2685	1334	1040.25	8.3175	0	102		2267	561	1	1
8.31833	207	1	1662	1	1	1	1	1	1	1	1	167.1		1	1	1	1	1	1	2176	311.714	8.31833	0	207		520	173	336	545	35	1406	502.5	8.31833	0	207		1	407	1	237	161.5	8.31833	0	207		1	1	53	1
8.31917	129	1	8401	1	1	4546	1	1	1	1	1	1295.5		1	20836	1	11552	18116	16748	1	9607.86	8.31917	8312.36	129		6187	13782	6818	8967	11507	4629	8648.33	8.31917	7352.83	129		1	9172	28021	18222	13854	8.31917	12558.5	129		41142	12327	12422	1
8.32083	77	1	8556	1	1	1	1	28449	14465	7072	13857	7240.4		1	34413	8973	1	3868	1	1	6751.14	8.32083	0	77		1793	21861	1	1	13703	1459	6469.67	8.32083	0	77		1	205	63629	23824	21914.8	8.32083	0	77		1	21216	7365	1
8.32167	95	1	1	1	1	1	1	61	1	1	116	18.5		1	170	1	1	1	1	1	25.1429	8.32167	0	95		1	1	1	1	1	1	1	8.32167	0	95		1	1	89	1	23	8.32167	0	95		1	1	1	1
8.3225	79	1	1	1	1	1	1	99635	1	1	1	9964.4		1	1	1	1	1	1	1434	205.714	8.3225	0	79		1	1	1	1	1	1	1	8.3225	0	79		1	289	120123	1	30103.5	8.3225	0	79		1	76304	20115	1
8.32333	70	1	1923	1	1	1	1	1	1	1	1	193.2		1	2934	370	8595	752	1028	1	1954.43	8.32333	0	70		1	189	747	5964	224	437	1260.33	8.32333	0	70		1366	62	1105	227	690	8.32333	0	70		2059	222	159	1
8.32417	73	1	177572	1	1	88625	1	1	1	1	1	26620.5		1	33469	1	209691	51843	36853	1	47408.4	8.32417	0	73		94822	58640	127441	185571	13137	92235	95307.7	8.32417	68687.2	73		1	29034	104677	52548	46565	8.32417	0	73		107795	1	12856	1
8.325	71	1	1888	1	1	1	1	807	1305	1	774	478		1	1133	1	1	1490	737	530	556.143	8.325	0	71		1006	1637	1	1	359	1	500.833	8.325	0	71		71	505	2531	1398	1126.25	8.325	0	71		2440	716	744	1
8.32583	98	1	164	146	1	1	1	1	1	1	1	31.8		1	164	388	307	12	109	101	154.571	8.32583	122.771	98		1	1	1	1	1	102	17.8333	8.32583	0	98		48	1	16	83	37	8.32583	0	98		142	1	1	1
8.32667	294	1	1	1	1	1	1	1	15	1	1	2.4		1	1	1	1	1	1	1	1	8.32667	0	294		1	12	1	1	1	1	2.83333	8.32667	0	294		1	1	1	1	1	8.32667	0	294		1	1	1	1
8.3275	66	2896	1	342	1	2805	1	1	1	700	1514	826.2		1	1	1	1	1	25449	1	3636.43	8.3275	0	66		2432	13088	1	1	1	1	2587.33	8.3275	0	66		1	1	6950	1	1738.25	8.3275	0	66		1	132	1	1
8.32833	379	1	1	1	1	21	21	1	1	1	1	5		1	1	1	42	1	1	1	6.85714	8.32833	0	379		1	1	1	1	1	1	1	8.32833	0	379		1	1	1	1	1	8.32833	0	379		1	1	17	1
8.32917	116	1	379	1	1	1	1	1	426	1	1	81.3		1	288	1	1	3162	1	1	493.571	8.32917	0	116		1	2732	1	1	1828	1	760.667	8.32917	0	116		942	2290	1	1	808.5	8.32917	727.2	116		4359	1	2477	1
8.33	99	1	2625	1	1	1	1	974	1118	1	322	504.5		1	926	1	1	1059	1102	1452	648.857	8.33	0	99		1785	1151	1	1	755	1	615.667	8.33	0	99		154	732	2119	1127	1033	8.33	0	99		2391	613	882	1
8.33083	68	383	1506	205	1	1	220	412	391	388	325	383.2		1	789	170	1	53	1	1	145.143	8.33083	0	68		1336	277	1	1	267	139	336.833	8.33083	0	68		98	47	904	306	338.75	8.33083	0	68		1	321	1	1
8.33167	147	21442	1	4216	1	2349	1	1	1	1	1	2801.4		1	1	1	1	1	1	1	1	8.33167	0	147		1523	1	1	6151	1	1470	1524.5	8.33167	0	147		1	1	1	1	1	8.33167	0	147		1	1	1	1
8.3325	575	1	1	1	1	1	1	1	1	1	1	1		1	25	1	1	1	1	1	4.42857	8.3325	0	575		1	1	1	45	1	1	8.33333	8.3325	0	575		1	1	1	1	1	8.3325	#DIV/0!	575		1	1	1	1
8.33333	90	427	313	196	240	1	351	174	1	109	229	204.1		1	1	1	447	11	1	897	194.143	8.33333	0	90		1	637	1	1	419	350	234.833	8.33333	0	90		89	173	992	338	398	8.33333	0	90		1	558	391	1
8.33417	75	1	67803	1	1	1	1	73199	89449	1	46511	27696.8		43815	90814	1	1	147546	73617	90602	63770.9	8.33417	0	75		1	135926	1	1	66074	1	33667.3	8.33417	0	75		27853	71070	267182	147188	128323	8.33417	100626	75		273640	1	74758	1
8.335	84	1649	1184	1019	929	1141	788	1	1536	1871	1	1011.9		522	1	1351	1827	1	1	1	529.143	8.335	0	84		767	88	933	932	1	738	576.5	8.335	0	84		1	1	131	59	48	8.335	-963.9	84		1	73	1	894
8.33583	81	2904	2699	1371	1	1898	1	1	2282	2452	1	1361		1	3826	1	4202	1116	3060	1	1743.86	8.33583	0	81		1856	2134	2539	2616	1385	1604	2022.33	8.33583	0	81		1	586	5958	1928	2118.25	8.33583	0	81		2788	2116	1	2133
8.33667	95	86	3656	1	155	10	1	1	69	9	47	403.5		1	1	124	1	1	920	1	149.857	8.33667	0	95		1	1	14	1	72	1	15	8.33667	0	95		50	40	1	197	72	8.33667	0	95		1	1	127	5034
8.3375	222	1	56	40	1	11	1	36	1	23	1	17.1		1	1	1	1	59	1	59	17.5714	8.3375	0	222		1	37	1	1	19	1	10	8.3375	0	222		1	1	1	1	1	8.3375	0	222		1	21	31	1
8.33833	162	1	281	1	1	1	1	1	48	1	1	33.7		1	1	1	1	436	1	15	65.1429	8.33833	0	162		1	542	1	1	357	7	151.5	8.33833	0	162		175	406	897	14	373	8.33833	339.3	162		456	1	422	1
8.33917	220	1	1	36	1	1	1	1	1	43	21	10.7		32	37	1	76	1	23	1	24.4286	8.33917	0	220		1	1	47	1	1	38	14.8333	8.33917	0	220		1	1	39	62	25.75	8.33917	0	220		1	28	15	1
8.34	87	1	1	1	1558	767	1	1	498	1	323	315.2		508	1	1	1	1259	1424	880	582	8.34	0	87		1	1772	1	1	589	1	394.167	8.34	0	87		1	491	2447	17	739	8.34	0	87		2471	1	1	1
8.34167	516	1	1	1	1	21	1	1	1	1	1	3		1	1	1	1	1	1	1	1	8.34167	0	516		1	1	1	1	1	1	1	8.34167	0	516		1	1	1	42	11.25	8.34167	0	516		1	1	1	16
8.3425	482	1	1	1	1	25	1	1	1	1	1	3.4		1	1	1	1	1	1	1	1	8.3425	0	482		1	1	1	1	1	1	1	8.3425	0	482		1	1	1	63	16.5	8.3425	0	482		1	1	1	1
8.34333	118	1	963	1	1	1	1	4661	1	1	1	563.2		1	1	2149	1	3460	1	1	802	8.34333	0	118		1	3357	1	1	3015	1	1062.67	8.34333	0	118		1344	1	8424	3613	3345.5	8.34333	0	118		4621	4348	3227	1
8.34417	119	1	1139	1	1	1	1	24314	1	1	1	2546.1		27	1	599	1	21421	1	524	3224.86	8.34417	0	119		1	18609	1	1	16835	1	5908	8.34417	0	119		7613	18566	38594	18123	20724	8.34417	18177.9	119		31237	20119	18173	1
8.345	364	1	1	1	1	1	22	1	1	1	1	3.1		1	1	1	1	1	1	1	1	8.345	0	364		1	1	1	1	1	1	1	8.345	0	364		1	1	1	1	1	8.345	0	364		1	1	13	1
8.34583	76	1	1	1	1	1	1	5754	1	1	3280	904.2		1	1	1	1	1	1	6111	873.857	8.34583	0	76		1	1	1	1	1	1	1	8.34583	0	76		1	1	1	1	1	8.34583	0	76		1	1	1	1
8.34667	268	1	184	249	91	62	102	223	96	75	42	112.5		143	112	1	1	230	121	130	105.429	8.34667	0	268		63	124	1	82	54	152	79.3333	8.34667	0	268		74	74	173	102	105.75	8.34667	0	268		151	128	91	111
8.3475	193	1	1	455	40	140	213	1	228	171	1	125.1		338	1	1	1	1	1	1	49.1429	8.3475	0	193		281	1	145	231	1	335	165.667	8.3475	0	193		1	1	1	1	1	8.3475	0	193		1	1	1	3571
8.34833	121	1	1	1	107454	61223	1	71010	1	1	1	23969.4		1	1	1	1	1	100108	1	14302	8.34833	0	121		69265	62291	71496	93299	58936	1	59214.7	8.34833	0	121		1	128	156366	68298	56198.2	8.34833	0	121		1	76534	1	1
8.34917	106	1	1	1	1	1	1	17366	1	1	1	1737.5		1	1	1	1	1	1	1	1	8.34917	0	106		1	15927	1	1	15136	1	5177.83	8.34917	0	106		1	1	38656	16879	13884.2	8.34917	0	106		1	19372	1	1
8.35	77	1	1	1	1	1	14032	1	1	1	1	1404.1		1	1	1	1	1	1	1	1	8.35	0	77		1	1	1	1	1	1	1	8.35	0	77		22625	2350	1	1	6244.25	8.35	0	77		1	1	1	1
8.35083	108	1	1	1	1	1	10	2381	1	11	1	240.9		1	1	45	1	606	1	1	93.7143	8.35083	0	108		1	546	1	1	1	7	92.8333	8.35083	0	108		1	1	638	745	346.25	8.35083	0	108		739	332	1	19
8.35167	70	3856	1	3603	5710	4176	1	1	1	4945	7225	2951.9		1560	8685	1	224	1	2746	1004	2031.57	8.35167	0	70		4430	127	5469	1	1039	1814	2146.67	8.35167	0	70		1	122	1	1	31.25	8.35167	0	70		4240	1	59	3204
8.3525	104	1	1	1	1	1	1	1	1	1	1	1		1	1	1	1	1	1	1	1	8.3525	#DIV/0!	104		652	1	1	1	1	1	109.5	8.3525	0	104		607	942	1	1	387.75	8.3525	386.75	104		1	1	1589	1
8.35333	123	1	127	1	174	70	86	226	73	46	1	80.5		1	255	12	92	1	116	1	68.2857	8.35333	0	123		1	169	117	141	137	1	94.3333	8.35333	0	123		1	1	442	150	148.5	8.35333	0	123		1	212	134	1
8.35417	120	1	1	1	1	1	1	24396	1	1	1	2440.5		1	1	1	1	1	1	1	1	8.35417	0	120		1	21282	1	1	21209	1	7082.5	8.35417	0	120		13709	1	55153	20656	22379.8	8.35417	19939.2	120		1	27036	1	1
8.355	173	217	30	565	1080	596	646	337	657	469	338	493.5		849	686	1	1	1	139	573	321.429	8.355	0	173		500	1	981	695	1	248	404.333	8.355	0	173		1	1	1	1	1	8.355	-492.5	173		919	1	1	35
8.35583	97	222	444	1	181	1	1	335	1	1	82	126.9		1	1	106	1	151	309	96	95	8.35583	0	97		1	241	1	1	1	1	41	8.35583	0	97		1	1	165	259	106.5	8.35583	0	97		274	100	1	1
8.35667	221	73	211	317	109	100	197	1	206	133	96	144.3		236	135	1	156	1	162	1	98.8571	8.35667	0	221		99	1	95	174	31	173	95.5	8.35667	0	221		1	1	63	1	16.5	8.35667	-127.8	221		270	23	1	1
8.3575	147	1	1	1	1	1	39990	1	1	1	1	3999.9		1	1	1	1	1	1	6764	967.143	8.3575	0	147		1077	116719	4128	4708	1	1350	21330.5	8.3575	0	147		2805	1	1	1	702	8.3575	0	147		1	1	8872	1
8.35833	74	5536	1	3774	6634	4428	1601	1	1	4318	2841	2913.5		2527	1	1398	10512	466	1	3644	2649.86	8.35833	0	74		2538	1	3196	5695	1	2420	2308.5	8.35833	0	74		1	2776	1077	1	963.75	8.35833	0	74		4652	1	1	22748
8.35917	143	2099	99528	1706	2837	1488	1850	1425	1985	1484	1020	11542.2		911	2095	1	3290	1	1	1796	1156.43	8.35917	0	143		1560	1	1848	2207	1	1304	1153.5	8.35917	0	143		1	1	1	1	1	8.35917	0	143		2865	928	1	142425
8.36	75	109412	1	91952	150179	71592	83059	1	1	70200	4869	58126.6		1	1	143	164235	1	14420	1	25543.1	8.36	0	75		90126	1	93504	116018	1	63665	60552.5	8.36	0	75		1	1	1	1	1	8.36	0	75		1	1	1	152552
8.36083	101	6393	1	1	8734	4124	1415	4394	6440	4086	2564	3815.2		2653	1	1	1	1	4748	5973	1911.14	8.36083	0	101		1	1	5507	6532	1	3496	2589.67	8.36083	0	101		1	6056	1	384	1610.5	8.36083	0	101		1	1	4918	5427
8.36167	66	1	1	1	1	1761	1	1	1	1	1110	287.9		1	1	1	1	1693	1	787	355	8.36167	0	66		1	1	94	1	536	1	105.667	8.36167	0	66		1048	1	1	1	262.75	8.36167	0	66		1	1	1	1
8.3625	250	1	770	9	1	1	7	47	9	1	5	85.1		30	1	1	1	8	9	471	74.4286	8.3625	0	250		328	49	1	1	5	9	65.5	8.3625	0	250		31	1	8	9	12.25	8.3625	0	250		1	26	1	442
8.36333	116	769	1	162	677	172	1	1	1	451	135	237		169	99	1	1340	232	761	1	371.857	8.36333	0	116		192	1	232	135	1	258	136.5	8.36333	0	116		823	1	407	1	308	8.36333	0	116		360	1	1	1
8.36417	151	1	162	78	1	1	1	8	158	182	1	59.3		1	257	338	118	1	10	489	173.429	8.36417	0	151		116	220	91	106	1	74	101.333	8.36417	0	151		1	1	1	1	1	8.36417	0	151		1	1	1	1
8.365	71	1189	1	1112	1700	1047	1372	1	1	962	1	738.6		672	1	1	2820	1	1	1	499.571	8.365	0	71		1116	1	1184	1516	1	1	636.5	8.365	0	71		961	409	1	1	343	8.365	0	71		1	1	1	3639
8.36583	255	1	1	1	1	1	1	1	1	1	1	1		1	1	1	1	1	1	1	1	8.36583	#DIV/0!	255		1	1	1	1	1	1	1	8.36583	#DIV/0!	255		1	1	1	1	1	8.36583	#DIV/0!	255		1	1	1	1
8.36667	107	658	179	666	990	1	648	1	721	73	248	418.5		72	282	207	727	640	462	1	341.571	8.36667	0	107		569	1	759	817	1	363	418.333	8.36667	0	107		492	449	1	1	235.75	8.36667	0	107		1844	1	999	695
8.3675	68	1	1	1	514	112	1	1	1	1	301	93.4		142	469	1	324	116	40	93	169.286	8.3675	0	68		241	1	135	1	1	1	63.3333	8.3675	0	68		1	1	1	159	40.5	8.3675	0	68		368	1	171	2410
8.36833	73	1	1	32069	40683	43728	1	1	65381	43684	1	22555		25919	1	25813	87016	6208	6547	44899	28057.6	8.36833	0	73		1	3054	22914	46634	1	22984	15931.3	8.36833	0	73		1	26009	1	5120	7782.75	8.36833	0	73		36637	1109	1	245872
8.36917	72	1	402	1	1119	917	689	577	1073	923	739	644.1		605	1224	1	1913	1	1	374	588.429	8.36917	0	72		1	1	581	1	1	247	138.667	8.36917	-505.433	72		1	795	1	1	199.5	8.36917	0	72		275	1	1	4354
8.37	580	1	1	1	1	21	1	1	1	1	1	3		1	1	1	1	1	1	1	1	8.37	0	580		1	1	1	1	1	5	1.66667	8.37	0	580		1	1	1	1	1	8.37	0	580		1	1	1	1
8.37083	176	1	847	829	1	483	340	485	681	668	584	491.9		297	1086	1	2896	144	333	324	725.857	8.37083	0	176		1439	1	1	1	1	374	302.833	8.37083	0	176		1	1	680	250	233	8.37083	0	176		889	91	1	2669
8.37167	223	1	1	1	57	1	1	1	25	1	22	11.1		1	1	47	1	1	1	1	7.57143	8.37167	0	223		1	1	1	1	1	1	1	8.37167	0	223		18	1	1	1	5.25	8.37167	0	223		1	1	1	68
8.3725	84	55	1	1	1	1	1	1	1	1	1602	166.5		1	2423	1	143	1	275	1215	579.857	8.3725	0	84		1	1	1	1	1	1	1	8.3725	0	84		1	1	1	1	1	8.3725	0	84		1	1	1	150
8.37417	172	1	1	1	1	3899	1	597	1	1	1	450.4		1	1	1	7056	229	1	1	1041.43	8.37417	0	172		3980	1	4363	5463	1	2921	2788.17	8.37417	2337.77	172		1	1	540	192	183.5	8.37417	0	172		741	1	1	1
8.375	284	1	629	833	254	236	385	729	267	219	120	367.3		452	385	146	268	739	387	431	401.143	8.375	0	284		249	366	189	350	189	486	304.833	8.375	0	284		253	271	456	351	332.75	8.375	0	284		531	419	308	338
8.37583	193	1	520	628	1	1	1	1	1	156	109	141.9		1	193	833	79	1	302	1	201.429	8.37583	0	193		153	1	123	161	1	430	144.833	8.37583	0	193		1	1	8	1	2.75	8.37583	0	193		361	1	1	1
8.37667	211	1	549	723	15	1	1	66	1	164	1	152.2		1	1	3199	1	1	17	429	521.286	8.37667	0	211		204	1	128	177	1	500	168.5	8.37667	0	211		154	6	1	1	40.5	8.37667	0	211		1	63	62	326
8.3775	283	1	3145	1	1	1	1	1	1	15	1	316.8		1	1	193	1	1	1	1	28.4286	8.3775	0	283		1282	1	1	1	1	1	214.5	8.3775	0	283		1	1	1	1	1	8.3775	0	283		1	5	1	1827
8.37833	81	1	1468	1	1	1	1	1502	1	1	1	297.8		1	1	1	1	858	1	1	123.429	8.37833	0	81		1264	1	1	1	1	1	211.5	8.37833	0	81		845	316	1653	529	835.75	8.37833	0	81		2724	1	1	1
8.37917	117	1	1	210	1	1	1	1	996	1	757	197		181	1838	1	1	34302	1	18447	7824.43	8.37917	0	117		1	28258	1	1	25319	1	8930.17	8.37917	0	117		12268	29508	1	1	10444.5	8.37917	10247.5	117		50717	1	29994	1
8.38	78	1	381	1	1	1	1	1	1	1	1	39		544	1	75	287	2798	1	647	621.857	8.38	0	78		1	1	1	1565	1	1	261.667	8.38	0	78		2701	1618	1	1	1080.25	8.38	1041.25	78		6959	1	4334	1765
8.38083	106	1	1	1	1	1	1	1	1	1	1	1		1	1	1	1	10748	1	1	1536.29	8.38083	0	106		1	1	1	1	1	1	1	8.38083	#DIV/0!	106		7999	6932	1	1	3733.25	8.38083	3732.25	106		24532	1	14343	1
8.38167	200	1	1	1	1	1	1	1499	1	1	1	150.8		1	1	1	1	376	1	1	54.5714	8.38167	0	200		1	383	1	1	424	1	135.167	8.38167	0	200		354	18	323	469	291	8.38167	0	200		364	181	418	818
8.3825	64	1	333	1080	1	1	1	1	1	1	1	142.1		309	1	1	567	1648	1	1	361.143	8.3825	0	64		182	1	1332	1	1	1	253	8.3825	0	64		1133	1117	1	1	563	8.3825	0	64		3564	1	2385	2759
8.38333	452	1	1	1	1	1	1	15	1	1	1	2.4		1	1	1	1	1	1	1	1	8.38333	0	452		1	1	1	33	1	1	6.33333	8.38333	0	452		1	1	1	1	1	8.38333	0	452		72	1	1	1
8.38417	161	1816	1	3109	2001	1148	2544	2469	2456	1510	1223	1827.7		1704	2550	1	1	284	3024	1	1080.71	8.38417	0	161		1314	1	1351	1801	1	1613	1013.5	8.38417	0	161		1	1	1	1528	382.75	8.38417	-1444.95	161		1	2245	1	1
8.385	133	8168	11284	11659	1	1	9069	1	6064	6235	2011	5449.3		6175	9500	844	7982	1	10293	1	4970.86	8.385	0	133		5525	1	5520	7571	1	6376	4165.67	8.385	0	133		635	1	1	157	198.5	8.385	-5250.8	133		529	202	332	12686
8.38583	79	1	1	1	1	1	1	1	1	1	1	1		1	1	33	1	23722	1	1	3394.29	8.38583	0	79		1	67337	1	1	71520	1	23143.5	8.38583	0	79		57151	16702	1	1	18463.8	8.38583	18462.8	79		51189	1	51831	8595
8.38667	102	1	1	993	1	802	1	1	1	1	236	203.8		1	626	1	1861	143	129	1	394.571	8.38667	0	102		868	1	841	1033	1	577	553.5	8.38667	0	102		1	1	538	1	135.25	8.38667	0	102		1	1	1	851
8.3875	208	1	652	857	129	274	378	30	257	250	1	282.9		395	26	3326	213	49	19	1	575.571	8.3875	0	208		314	1	216	293	1	625	241.667	8.3875	0	208		15	1	1	1	4.5	8.3875	0	208		1	1	1	35
8.38833	94	1	1	1	1	1	1	1	1	1	1	1		1	1	1	1	1577	1	1	226.143	8.38833	0	94		1	2470	1	1	2307	1	796.833	8.38833	0	94		1222	1056	1	1	570	8.38833	569	94		3641	1	2189	1
8.38917	207	1120	3582	4575	947	1448	1975	248	1391	1499	1	1678.6		2211	1	17264	1423	1	216	1	3016.71	8.38917	0	207		1753	1	1332	1703	1	3357	1357.83	8.38917	0	207		242	1	22	345	152.5	8.38917	0	207		1	108	1	1035
8.39	104	1310	1270	1552	1	1	1337	1	1275	695	699	814.1		661	1083	1	1667	1	1439	1	693.286	8.39	0	104		997	1	396	1560	1	883	639.667	8.39	0	104		1	1	1	797	200	8.39	0	104		2198	1	1	2605
8.39083	203	1	1	118	1	8	193	1	185	1	75	58.4		68	139	654	129	1	129	11	161.571	8.39083	0	203		1	67	1	1	665	1	122.667	8.39083	0	203		886	1	1	1	222.25	8.39083	0	203		1	48	742	1
8.39167	147	7017	1	1158	1	1	37557	1	1	1	17799	6353.7		1	1	1	1	4432	1	1	634	8.39167	0	147		1	1	1	1	1	1	1	8.39167	0	147		7761	1	1	1	1941	8.39167	0	147		1	1	1	1
8.3925	560	1	1	1	1	1	1	1	1	1	1	1		1	1	1	1	1	1	1	1	8.3925	#DIV/0!	560		1	1	1	44	1	1	8.16667	8.3925	0	560		1	1	1	1	1	8.3925	#DIV/0!	560		1	1	1	1
8.39333	140	1	1	1	1	1	1	1	1	8	1	1.7		1	1	1	1	1	1	1	1	8.39333	0	140		1	1	1	1	1	1	1	8.39333	0	140		1	1	1	25	7	8.39333	0	140		1	1	1	134
8.39417	62	706	735	1668	2897	1357	1968	1	1	1194	1	1052.8		490	1	24	1451	1605	1	1	510.429	8.39417	0	62		696	1	1572	1797	1	720	797.833	8.39417	0	62		1509	1151	1	1	665.5	8.39417	0	62		3442	1	2669	2180
8.395	148	749	244	1	1	1	1	1	1	1	2528	352.8		1	1	1	1	649	3629	828	730	8.395	0	148		1	1	1	1	1	1	1	8.395	0	148		545	1	4916	131	1398.25	8.395	0	148		1086	1	1	1
8.39583	144	1	13979	169	260	127	141	131	217	174	104	1530.3		81	185	12	455	1	97	16	121	8.39583	0	144		1	1	17	169	1	76	44.1667	8.39583	0	144		4	1	1	1	1.75	8.39583	0	144		28	83	1	20631
8.39667	89	14359	1	11300	1	1	1	1	5005	6265	1	3693.5		4631	1	2882	26117	1	1	1	4804.86	8.39667	0	89		12862	1	1	15325	1	7167	5892.83	8.39667	0	89		2230	1	7613	2694	3134.5	8.39667	0	89		1	3688	1	23387
8.3975	74	2901	2026	1	1	211	1	1	1	1	1	514.5		331	1	1	2590	1	1	1	418	8.3975	0	74		1	1	1	1	1	1	1	8.3975	0	74		1	1	1	1	1	8.3975	0	74		1	1	1	1
8.39833	115	1	1011	1	1	554	1	1	1	1	1	157.3		1	65	169	1351	131	1	1	245.571	8.39833	0	115		836	1	356	422	1	458	345.667	8.39833	0	115		105	1	22	1	32.25	8.39833	0	115		1	1	1	2461
8.39917	119	106	1	706	1	1	1	1	1	1	1	82		100	1	318	1311	1	1	582	330.571	8.39917	0	119		338	1	77	1	1	695	185.5	8.39917	0	119		1	1	1	1	1	8.39917	0	119		1	1	1	1
8.4	100	5360	3834	3308	4492	2551	5400	807	3951	2073	1	3177.7		1640	1	923	11145	44	1195	1981	2418.43	8.4	0	100		5009	1	4296	5369	1481	2505	3110.17	8.4	0	100		1321	1	1	1	331	8.4	-2846.7	100		1	647	1594	10358
8.40083	75	1	63808	1	2871	2162	1	1	1	1	1	6884.8		1	11318	1	1	1	1	1	1617.71	8.40083	0	75		1	1	1	1	1	1	1	8.40083	0	75		1	1	1	1	1	8.40083	0	75		1	1	1	1
8.40167	73	1	37328	1	1	6170	1	1	1	691	1	4419.6		3862	1	1	24138	1	1	1	4000.71	8.40167	0	73		1	1	1	1	1	1	1	8.40167	0	73		1	1	23539	1	5885.5	8.40167	0	73		1	1	1	1
8.4025	85	36	1144	1	1	1	604	1	1	68	1	185.8		1	1	783	1	1	1	1	112.714	8.4025	0	85		1	1	1	1	1008	1	168.833	8.4025	0	85		1	1	1	2099	525.5	8.4025	0	85		39	1	1126	1
8.40333	163	1	361	471	1	138	216	1	126	138	38	149.1		201	194	182	120	1	96	66	122.857	8.40333	0	163		175	1	105	38	1	306	104.333	8.40333	0	163		1	1	1	1	1	8.40333	0	163		1	1	1	715
8.40417	72	1	1049	316	1310	226	1	245	94	1	1	324.4		1	1	646	1022	1670	251	1	513.143	8.40417	0	72		767	1	1	1	1	1	128.667	8.40417	0	72		1050	1190	2688	1760	1672	8.40417	1347.6	72		1	1	1	1
8.405	101	1	1	6652	1	1	1	68	1	1	894	762.1		679	5552	1	10911	1	1	1	2449.43	8.405	0	101		4934	1342	1	1	1	1	1046.67	8.405	0	101		264	1	6728	1	1748.5	8.405	0	101		1	3729	1	1
8.40583	116	648	589	123	26	1	1	458	305	1	1	215.3		37	2649	548	385	1597	2023	1	1034.29	8.40583	818.986	116		273	560	1	1	559	1	232.5	8.40583	0	116		1	840	2378	1220	1109.75	8.40583	894.45	116		1	446	821	1142
8.40667	80	1	1	1	1	1	1	1	1	1	1	1		1	1	1	2692	5633	1	197	1218	8.40667	0	80		1	1	1	1	1	1	1	8.40667	#DIV/0!	80		1	3574	1	1	894.25	8.40667	0	80		13564	1	7801	1
8.4075	193	1	35	1	1	1	1	410	116	1	1	56.8		246	188	1	1	402	1	1	120	8.4075	0	193		1	267	1	1	1	1	45.3333	8.4075	0	193		1	1	388	229	154.75	8.4075	0	193		262	406	1	1
8.40833	89	1	1	1	13823	7451	9623	1	1	1	1	3090.4		1	1	1	1	1	1	1	1	8.40833	0	89		1	1	11930	1	4408	1	2723.67	8.40833	0	89		1	3274	1	1	819.25	8.40833	0	89		1	1	3684	1
8.40917	414	1	1	1	1	1	1	19	1	1	1	2.8		1	1	1	53	1	1	1	8.42857	8.40917	0	414		1	1	1	1	1	1	1	8.40917	0	414		1	1	1	1	1	8.40917	0	414		1	1	1	1
8.41	221	111	1	111	185	116	133	249	136	80	101	122.3		148	107	85	1	196	119	1	93.8571	8.41	0	221		199	80	194	268	69	166	162.667	8.41	0	221		121	65	180	1	91.75	8.41	0	221		1	221	71	266
8.41083	209	1	1	508	1	16	232	1	116	104	94	107.4		206	197	1	1	93	18	1	73.8571	8.41083	0	209		133	82	22	1	1	351	98.3333	8.41083	0	209		1	23	1	1	6.5	8.41083	0	209		1	1	1	212
8.41167	223	1	1	1	1	1	1	36	1	1	1	4.5		1	1	1	1	1	1	14	2.85714	8.41167	0	223		1	1	1	1	1	1	1	8.41167	0	223		1	1	1	1	1	8.41167	0	223		1	1	1	1
8.4125	70	1	1	1	1	1	1	1	1	1	1	1		1	1	650	1	2546	1	1	457.286	8.4125	0	70		110	1	1	196	1	1	51.6667	8.4125	0	70		2787	1	1	3189	1494.5	8.4125	1493.5	70		1	1055	1	1
8.41333	135	1	1	1	472	1	1	1	303	1	1	78.3		291	428	1	1	1	1	1	103.429	8.41333	0	135		317	1	353	392	1	1	177.5	8.41333	0	135		1	1	1	1	1	8.41333	0	135		15	1	13	1
8.41417	122	1	1	1	1	1	1	1	1	1	1	1		1	1	14	1	3645	1	1	523.429	8.41417	0	122		1	1	1	1	1	1	1	8.41417	#DIV/0!	122		2825	2283	1	1	1277.5	8.41417	1276.5	122		8487	1	4937	1038
8.415	318	1	673	832	126	227	317	1	158	190	1	252.6		361	315	1	163	1	101	479	203	8.415	0	318		249	1	180	256	1	588	212.5	8.415	0	318		1	1	1	23	6.5	8.415	0	318		1	1	1	409
8.41583	64	309	259	161	1	1	1	1	1	1	40	77.5		1	253	1	1	1059	310	1	232.286	8.41583	0	64		75	1	1	508	1	1	97.8333	8.41583	0	64		1	1	1	681	171	8.41583	0	64		1	1	1	1
8.41667	151	134	1	402	443	447	1	1	470	349	403	265.1		420	480	1	1	1	536	369	258.286	8.41667	0	151		498	598	509	643	168	501	486.167	8.41667	221.067	151		291	109	421	118	234.75	8.41667	0	151		1	91	173	637
8.4175	170	1	1	7	65	1	1	1	97	59	1	23.4		1	1	182	116	69	1	930	185.714	8.4175	0	170		1	1	1	1	62	8	12.3333	8.4175	0	170		1	78	34	1	28.5	8.4175	0	170		1	1	1	32
8.41833	108	1	1	1	1	1	1	1	1	1	1	1		1	1	1	1	1	1	35	5.85714	8.41833	0	108		1	1	1	17	728	1	124.833	8.41833	0	108		583	105	1	53	185.5	8.41833	184.5	108		1	1	759	1
8.41917	158	1	1	1	1	1	1	1	1	1	1	1		1	1	1	561	1	1	1	81	8.41917	0	158		1	1	70	1	1	1	12.5	8.41917	0	158		1	2119	1	3547	1417	8.41917	1416	158		1	1	1	1
8.42	95	54	1	1	1	1	1	1	1	1	1	6.3		1	1	1	1	1	1	62	9.71429	8.42	0	95		1	1	1	1	1	1	1	8.42	0	95		1	1	1	1	1	8.42	0	95		1	1	1	1
8.42083	141	1	1	1	16	8	1	1	56	10	1	9.6		34	1	1	1	1	1	1	5.71429	8.42083	0	141		1	1	1	1	1	32	6.16667	8.42083	0	141		1	1	1	11	3.5	8.42083	0	141		1	1	1	546
8.42167	119	1	1	1	1	1	151	1	1	1	1	16		1	1	1	1016	1	1081	1	300.286	8.42167	0	119		1	596	1	1	1	1	100.167	8.42167	0	119		1	1	1446	1042	622.5	8.42167	606.5	119		1	1	1	1
8.4225	144	1	67	1	1	1	1	1	68	1	1	14.3		1	1	1	1	1	1	1	1	8.4225	0	144		1	1	1	1	1	1	1	8.4225	0	144		1	27	110	68	51.5	8.4225	0	144		1	1	1	1
8.42333	179	1	250	220	228	155	127	1	180	134	1	129.7		210	1	95	227	1	1	1	76.5714	8.42333	0	179		237	1	217	274	1	223	158.833	8.42333	0	179		1	1	1	10	3.25	8.42333	-126.45	179		1	1	1	300
8.42417	130	1	2199	1	1	1	1	220	1	1	45	247.1		1	1	1287	126	2965	2596	1	996.714	8.42417	0	130		1	1386	1	1	1362	1	458.667	8.42417	0	130		1749	1867	3383	2965	2491	8.42417	2243.9	130		1	1	1483	1
8.42583	147	1	1	1	1	1	1	1	1	1	1	1		1	1	1	1	1	1	1	1	8.42583	#DIV/0!	147		1	1	2052	1	1	1	342.833	8.42583	0	147		10102	1	1	1	2526.25	8.42583	0	147		1	1	1	1
8.42667	93	1	1	1	202	1	1	702	493	1	1	140.4		1	1	1	1	1	683	1	98.4286	8.42667	0	93		1	1	229	327	1	1	93.3333	8.42667	0	93		1	1	1	711	178.5	8.42667	0	93		590	1	1	1
8.42833	101	1	9739	783	1788	1	1	1	1	1	1	1231.7		1	1790	1	1	991	1150	1	562.143	8.42833	0	101		1386	1	1498	1587	227	762	910.167	8.42833	0	101		121	375	1500	1086	770.5	8.42833	0	101		3106	431	1	18180
8.42917	194	1	1	1	1	1	1	80	1	1	1	8.9		40	30	1	1	63	1	1	19.5714	8.42917	0	194		1	52	1	1	1	1	9.5	8.42917	0	194		1	1	60	52	28.5	8.42917	0	194		1	66	1	1
8.43	149	305	1	1	1	1	1	1	305	1	1201	181.8		1	1	1	1	333	1	1	48.4286	8.43	0	149		1	1	1	1	1	1	1	8.43	0	149		1	1	1	222	56.25	8.43	0	149		363	1	1	1
8.43083	214	1	6	1	1	1	1	1	1	1	1	1.5		1	1	79	1	1	1	1	12.1429	8.43083	0	214		1	1	1	1	1	1	1	8.43083	0	214		1	1	1	1	1	8.43083	0	214		1	1	1	1
8.43167	66	1	1	486	1	1	1	1	1	1	899	139.3		1	1	1	1	1	1	626	90.2857	8.43167	0	66		817	1	56	1	1	1	146.167	8.43167	0	66		1	1179	4572	1	1438.25	8.43167	0	66		1	1	1	1
8.4325	118	1258	945	736	1915	1277	769	392	960	956	479	968.7		638	730	1	2472	1075	590	105	801.571	8.4325	0	118		1605	304	1702	1980	1	904	1082.67	8.4325	0	118		1	543	1243	1041	707	8.4325	0	118		2321	400	1	1295
8.43333	117	10769	7269	7017	20145	10357	1	1	7701	7842	1	7110.3		5354	1	1014	22231	5160	1	1	4823.14	8.43333	0	117		14637	1	15108	18586	598	7519	9408.17	8.43333	0	117		1	1993	5268	5042	3076	8.43333	0	117		1	851	1119	11910
8.43417	77	4260	2776	2102	4312	1398	3851	1	2106	1383	269	2245.8		1119	1	768	7043	1440	4445	1	2116.71	8.43417	0	77		5022	1	4154	4910	1	1723	2635.17	8.43417	0	77		1	1	1	1	1	8.43417	-2244.8	77		1541	1	1	12754
8.435	267	1	1	1	1	1	1	1	1	1	1	1		1	1	68	1	1	1	48	17.2857	8.435	0	267		1	126	1	1	1	1	21.8333	8.435	0	267		1	1	1	1	1	8.435	#DIV/0!	267		1	1	1	1
8.43583	86	1	402	1	1	1	1	3647	4972	1	1993	1102		1	5332	1	241	3629	3532	1215	1993	8.43583	0	86		339	1604	1	1	1	1	324.5	8.43583	0	86		1	2213	3750	3509	2368.25	8.43583	0	86		7922	1254	1789	1008
8.43667	184	1	1	1	1	1	1	1	1	1	1	1		1	1	34	1	1	1	1	5.71429	8.43667	0	184		1	1	1	1	1	1	1	8.43667	#DIV/0!	184		1	1	1	1	1	8.43667	#DIV/0!	184		1	1	1	1
8.4375	134	1	1	1	1	1	294	914	303	1	1	151.8		166	1	1	1	874	1	104	164	8.4375	0	134		231	741	1	175	443	131	287	8.4375	0	134		298	130	1282	657	591.75	8.4375	0	134		1234	789	521	365
8.43833	408	1	1	1	1	18	1	1	1	1	1	2.7		1	1	1	1	1	1	1	1	8.43833	0	408		1	1	1	1	1	1	1	8.43833	0	408		1	1	1	1	1	8.43833	0	408		1	1	1	1
8.43917	196	1	1	1	1	1	1	1	1	1	1	1		1	1	1	1	1	1	16	3.14286	8.43917	0	196		1	1	1	1	1	9	2.33333	8.43917	0	196		1105	155	1	1	315.5	8.43917	0	196		1	1	1271	1
8.44	97	1	318	1	1	1	1	12	1	1	1	33.8		1	1	1	363	1	1	1	52.7143	8.44	0	97		1	1	1	1	1	118	20.5	8.44	0	97		1	1	109	1	28	8.44	0	97		1	1	1	1962
8.44083	163	1	110	79	1	1	1	237	1	1	1	43.3		9	1	1	1	206	1	1	31.4286	8.44083	0	163		1	113	1	1	1	1	19.6667	8.44083	0	163		58	1	230	91	95	8.44083	0	163		1	103	1	161
8.44167	281	1	2	1	1	1	1	28	4	32	1	7.2		1	27	1	1	6	1	1	5.42857	8.44167	0	281		1	1	1	1	4	1	1.5	8.44167	0	281		1	1	1	1	1	8.44167	0	281		1	1	1	11051
8.4425	172	226	3705	348	605	384	374	1	440	343	248	667.4		229	213	1	961	8	74	1	212.429	8.4425	0	172		604	50	404	718	376	368	420	8.4425	0	172		547	183	1	1	183	8.4425	0	172		110	24	418	8190
8.44333	225	1	1	1	1	1	1	82	1	1	1	9.1		1	1	1	1	96	1	1	14.5714	8.44333	0	225		1	1	1	1	6	1	1.83333	8.44333	0	225		1	1	76	29	26.75	8.44333	0	225		1	1	1	1
8.44417	255	1	1	1	1	1	1	1	1	1	1	1		1	1	1	1	1	1	1	1	8.44417	#DIV/0!	255		1	1	1	1	1	1	1	8.44417	#DIV/0!	255		1	1	1	1	1	8.44417	#DIV/0!	255		1	1	1	1
8.445	73	1	1	7053	17505	14291	1	1	21910	10466	1	7123		10951	1	36990	1	10632	11862	24308	13535	8.445	0	73		1	3922	1	32710	1	12089	8120.67	8.445	0	73		1	6079	23949	9517	9886.5	8.445	0	73		48200	7173	1	95279
8.44583	87	1	1	1	567	866	1	496	588	1	329	285.1		644	1	150	1	726	1506	161	455.571	8.44583	0	87		800	1	647	494	1	619	427	8.44583	0	87		1	1	770	638	352.5	8.44583	0	87		1855	1	1	2193
8.44667	82	1806	1912	1574	2163	1389	1394	457	1925	1384	1	1400.5		929	1	152	2834	453	1	1	624.429	8.44667	0	82		1855	256	1581	2322	300	1159	1245.5	8.44667	0	82		1	267	1	450	179.75	8.44667	-1220.75	82		1	233	320	5247
8.4475	251	1	1	1	1	1	31	1	15	1	1	5.4		41	1	58	1	1	11	1	16.2857	8.4475	0	251		1	1	1	1	1	1	1	8.4475	0	251		20	1	1	1	5.75	8.4475	0	251		1	1	14	1
8.44833	157	696	17057	811	1076	705	967	190	1175	802	776	2425.5		507	731	276	1483	58	150	319	503.429	8.44833	0	157		806	107	807	990	72	524	551	8.44833	0	157		32	21	83	115	62.75	8.44833	0	157		282	65	57	34638
8.44917	253	1	1	1	1	1	1	1	1	1	1	1		1	1	1	1	1	1	1	1	8.44917	#DIV/0!	253		1	1	1	1	1	1	1	8.44917	#DIV/0!	253		1	1	1	1	1	8.44917	#DIV/0!	253		1	1	1	1
8.45	75	2130	1	2293	1	1	7981	13474	9361	9041	1	4428.4		3053	585	12138	1	11136	1	1	3845	8.45	0	75		928	12328	350	333	6982	5009	4321.67	8.45	0	75		5117	4870	20171	9113	9817.75	8.45	0	75		16772	11360	8705	179331
8.45083	224	1	1	1	1	1	1	1	1	1	1	1		1	1	1	1	1	1	1	1	8.45083	#DIV/0!	224		1	1	1	1	1	1	1	8.45083	#DIV/0!	224		1	1	1	1	1	8.45083	#DIV/0!	224		1	1	1	1
8.45167	113	873	1	592	941	621	935	256	1220	797	1	623.7		347	711	121	1	172	151	1	214.857	8.45167	-408.843	113		1	1	461	557	1	529	258.333	8.45167	0	113		1	1	201	1	51	8.45167	-572.7	113		578	165	1	3305
8.4525	226	1	16	1	1	1	1	1	1	1	1	2.5		1	1	1	1	1	1	1	1	8.4525	0	226		1	1	1	1	1	1	1	8.4525	0	226		1	1	1	1	1	8.4525	0	226		1	1	1	1
8.45417	107	236	1	1	444	38	215	210	248	117	6	151.6		1	1	1	533	662	58	202	208.286	8.45417	0	107		1	450	1	159	283	1	149.167	8.45417	0	107		191	280	679	1	287.75	8.45417	0	107		1313	218	323	1
8.455	170	1	713	1225	1	1	1799	5	2399	2230	1	837.5		1059	68	1	1120	1	63	1	330.429	8.455	0	170		1	40	105	1	1	1770	319.667	8.455	0	170		1	5	1	1	2	8.455	0	170		13	1	36	3044
8.45583	148	1	464	1	1	1	1	1	1	1	2801	327.3		1	1	1	354	70	4358	1	683.714	8.45583	0	148		440	1	209	1	1	1	108.833	8.45583	0	148		784	1	5345	1	1532.75	8.45583	0	148		1	1	1	1
8.45667	189	1	333	257	116	102	135	1	149	152	1	124.7		128	151	1	194	1	1	157	90.4286	8.45667	0	189		163	1	97	156	1	191	101.5	8.45667	0	189		1	1	14	1	4.25	8.45667	0	189		1	1	1	375
8.4575	79	1	1	1	1	3702	1	1	1	1	1	371.1		1	1	1	1657	1	60741	1	8914.71	8.4575	0	79		2174	1	1	1	1	1	363.167	8.4575	0	79		1	1	1	1	1	8.4575	0	79		1	1	1	2804
8.45833	121	1	1	1	1	1	1	1	1	1	1	1		1	1	1	1	42597	1	1	6086.14	8.45833	0	121		1	1	1	1	1	1	1	8.45833	#DIV/0!	121		32733	26461	1	1	14799	8.45833	14798	121		99750	1	56205	1
8.45917	242	1	1	1	1	1	1	1	1	1	1	1		20	1	1	1	1	1	1	3.71429	8.45917	0	242		1	1	1	1	1	1	1	8.45917	#DIV/0!	242		1	1	1	4	1.75	8.45917	0	242		1	1	1	1
8.46083	60	1317	1	1	392	304	988	1228	1564	225	1	602.1		321	1683	1	1	894	1375	18	613.286	8.46083	0	60		1	654	1	1	1	1	109.833	8.46083	0	60		1	386	1591	974	738	8.46083	0	60		3003	1	281	5455
8.46167	100	1	1	1	4100	2531	1	1	1	2360	1	899.8		1	1	1	2702	913	1	1	517.143	8.46167	0	100		1	631	1109	1729	1369	1	806.667	8.46167	0	100		1	254	5770	653	1669.5	8.46167	0	100		1	879	1359	1
8.4625	104	556	246	405	1	440	584	1232	588	272	324	464.8		243	1	1	1	1200	1	1	206.857	8.4625	0	104		1	959	1	1	594	307	310.5	8.4625	0	104		129	406	1930	1082	886.75	8.4625	0	104		2295	954	508	443
8.46333	89	8860	1	5681	10204	5515	5313	8645	1	6392	731	5134.3		3625	7253	1859	7943	7058	12385	2311	6062	8.46333	0	89		2622	5751	3454	4366	4423	2345	3826.83	8.46333	0	89		744	1789	14131	7857	6130.25	8.46333	0	89		23656	6262	4003	5476
8.46417	130	3713	22	2321	5392	2995	4084	2976	4209	2812	1620	3014.4		2308	4381	847	1	53	1	1075	1238	8.46417	-1776.4	130		1	38	1432	1692	65	952	696.667	8.46417	-2317.73	130		101	118	377	227	205.75	8.46417	-2808.65	130		6166	1	133	4684
8.465	69	45	31	29	1	1	1	1	106	1	1	21.7		1	1	1	139	179	808	1	161.429	8.465	0	69		1	1064	1	1	38	1	184.333	8.465	0	69		1	1	1	180	45.75	8.465	0	69		630	692	201	5382
8.46583	119	292	1	105	1	338	502	413	1	286	232	217.1		129	779	1	836	1	1	199	278	8.46583	0	119		201	1	320	1	84	127	122.333	8.46583	0	119		1	273	1	1	69	8.46583	0	119		3158	432	1	1
8.46667	174	1	352	256	364	271	257	1	377	237	231	234.7		258	282	242	448	178	97	138	234.714	8.46667	0	174		253	32	177	259	112	278	185.167	8.46667	0	174		131	96	211	122	140	8.46667	0	174		1	25	85	772
8.4675	64	1	1	1	325	1	309	1	248	1	1	88.9		1	1	1	1	489	1	1	70.7143	8.4675	0	64		1	1	193	1	1	1	33	8.4675	0	64		1	1	1	361	91	8.4675	0	64		1357	141	1	475
8.46833	105	1	321	1	2522	1	1	1	1	590	1	344		1	1	1	820	7805	1	15	1234.86	8.46833	0	105		833	1	1	1333	4489	1	1109.67	8.46833	0	105		2533	3468	1	1	1500.75	8.46833	0	105		10135	1	4999	457
8.46917	167	1	350	1	338	81	1	135	1	1	135	104.4		1	222	1	628	62	1	1	130.857	8.46917	0	167		1	118	1	1	130	1	42	8.46917	0	167		86	1	334	1	105.5	8.46917	0	167		1	1	1	153
8.47	221	47	32	1	1	1	1	109	1	1	1	19.5		1	1	1	1	213	1	136	50.5714	8.47	0	221		1	1	1	1	72	1	12.8333	8.47	0	221		186	137	207	133	165.75	8.47	146.25	221		277	141	92	1
8.47083	67	1	55	112	198	38	1	1	1	388	103	89.8		86	1	306	164	293	583	16	207	8.47083	0	67		1	294	83	34	104	66	97	8.47083	0	67		1	211	613	302	281.75	8.47083	0	67		29	161	1	4060
8.47167	158	1	1	1	6786	3768	1	1	1	1	1	1056.2		1	1	1	4273	59	1	1	619.571	8.47167	0	158		1545	1	1825	2185	1	1191	1124.67	8.47167	0	158		1	1	1	36	9.75	8.47167	0	158		1	1	1	1
8.4725	79	75409	1	1	1	1	1	56706	1	2963	1	13508.5		1	1	369	1	1	1	1	53.5714	8.4725	0	79		509	1	1	1	1	1	85.6667	8.4725	0	79		1	1	1	1	1	8.4725	0	79		1	1	1	1
8.47333	155	35	1177	2403	2882	1963	3743	1	5133	4507	5109	2695.3		2030	1229	1	1768	12	4147	1	1312.57	8.47333	0	155		3242	63	2669	3904	1	3431	2218.33	8.47333	0	155		92	97	1	1	47.75	8.47333	-2647.55	155		1	1	1	5981
8.47417	320	1	85	102	1	1	1	74	1	1	18	28.5		37	1	1	1	42	1	1	12	8.47417	0	320		1	1	1	1	1	80	14.1667	8.47417	0	320		5	1	26	1	8.25	8.47417	0	320		1	1	24	51
8.475	117	1	1	1	1	1	3929	1414	1	1	4810	1016		1	7158	246	1	4979	3368	1	2250.57	8.475	0	117		1	1	1	1	455	1	76.6667	8.475	0	117		1	1	4696	4695	2348.25	8.475	0	117		16329	1580	1	1
8.47583	113	1	107	1	1	1	1	1	1	1	622	73.7		1	1	1	472	1	756	1	176.143	8.47583	0	113		1	1	1	1	1	1	1	8.47583	0	113		1	1	1	1	1	8.47583	0	113		1	1	1	1
8.47667	124	1	51	1	122	1	42	319	35	40	1	61.3		1	1	55	129	13	30	39	38.2857	8.47667	0	124		76	64	1	5	78	18	40.3333	8.47667	0	124		54	1	1	80	34	8.47667	0	124		1	5	109	78
8.4775	519	1	1	1	1	1	1	15	1	1	1	2.4		1	1	1	1	1	1	1	1	8.4775	0	519		1	1	1	1	1	1	1	8.4775	0	519		1	1	1	15	4.5	8.4775	0	519		1	1	1	1
8.47833	153	1	1	192	1	71	618	175	437	94	414	200.4		63	193	1	187	11	4493	1	707	8.47833	0	153		1	3063	14	184	1	149	568.667	8.47833	0	153		1	1	12	1	3.75	8.47833	0	153		1	616	1	1
8.47917	209	1	1	1	1	1	1	1	1	1	1	1		1	211	1	2343	186	208	1	421.571	8.47917	0	209		1	1	1	1	65	1	11.6667	8.47917	0	209		70	102	1	1	43.5	8.47917	42.5	209		1	1	1	1
8.48	207	1	1	1	1	1	1	1	1	1	1	1		567	1955	1	20303	1	2643	1	3638.71	8.48	0	207		1	1	1	1	1322	1	221.167	8.48	0	207		888	1154	2864	1721	1656.75	8.48	1655.75	207		1	1673	1694	1
8.48083	61	1	107	1	510	255	1	1	1	1864	1078	381.9		1	144	1	715	176	761	1	257	8.48083	0	61		1	1	637	6850	1	328	1303	8.48083	0	61		1	1	1	1	1	8.48083	0	61		1	1	1	1723
8.48167	157	1	435	1	1	1	1	877	1	1	1	132		166	1	1	456	585	1050	1	322.857	8.48167	0	157		1243	1	1	1	86	1	222.167	8.48167	0	157		1	1	1	654	164.25	8.48167	0	157		1140	746	62	1
8.4825	115	1	136	1	1	255	1	247	1	1	1	64.5		1	1	1150	1	231	160	1	220.714	8.4825	0	115		110	169	1	1	180	1	77	8.4825	0	115		374	1	734	322	357.75	8.4825	293.25	115		1	212	1	1
8.48333	72	1	759	1	1	2100	1	1	1	1	10	287.6		1	3	1	2179	241	1	1	346.714	8.48333	0	72		848	1	620	1646	1	515	605.167	8.48333	0	72		148	1	418	178	186.25	8.48333	0	72		1	1	1	192
8.48417	71	1	983	1	3130	1883	1	1	1	1	1	600.3		1	1	1	3254	101	1	1	480	8.48417	0	71		782	244	1390	1722	1	1	690	8.48417	0	71		131	1	1	93	56.5	8.48417	0	71		1	1	47	1037
8.48583	254	1	1	1	1	1	1	1	1	1	1	1		1	1	1	1	1	1	1	1	8.48583	#DIV/0!	254		1	1	1	1	1	1	1	8.48583	#DIV/0!	254		1	1	1	1	1	8.48583	#DIV/0!	254		1	1	1	1
8.4875	147	1	1	1	1	4408	1	6231	1	11811	28266	5072.2		1	1	1	1	3219	1	6106	1332.86	8.4875	0	147		1	94362	1	10265	1	11037	19277.8	8.4875	0	147		1	1	29951	1	7488.5	8.4875	0	147		1	1	1	1
8.48833	223	1	40	1	88	1	20	1	53	10	1	21.6		1	1	1	23	1	1	1	4.14286	8.48833	0	223		15	1	1	18	15	4	9	8.48833	0	223		11	1	1	1	3.5	8.48833	0	223		1	1	1	20
8.48917	253	1	1	1	1	1	1	1	1	1	1	1		1	1	1	1	1	1	1	1	8.48917	#DIV/0!	253		1	1	1	1	1	1	1	8.48917	#DIV/0!	253		1	1	1	1	1	8.48917	#DIV/0!	253		1	1	1	1
8.49	80	826	578	1302	2155	1	1125	1	1387	397	893	866.5		1	1377	225	1366	1	894	1	552.143	8.49	0	80		992	1	1	2081	1	684	626.667	8.49	0	80		1	1	1	1	1	8.49	-865.5	80		3523	1	1	1949
8.49083	76	1	1	1	171	1	611	278	617	322	248	225.1		1	114	1	210	1	1	1	47	8.49083	0	76		117	1	1	385	1	274	129.833	8.49083	0	76		1	348	1	1	87.75	8.49083	0	76		1	296	1	1
8.49167	88	1	1	1	1	573	1	1	1	1	1	58.2		1	71	1	536	1	256	1	123.857	8.49167	0	88		99	91	1	110	1	1	50.5	8.49167	0	88		146	491	1	189	206.75	8.49167	0	88		1	173	1	1
8.4925	208	1073	2500	1608	2139	934	1370	1	1368	1190	733	1291.6		409	794	1	1	420	1004	259	412.571	8.4925	-879.029	208		2346	1	1185	1573	1	790	982.667	8.4925	0	208		1	1	1	1	1	8.4925	-1290.6	208		1410	1	1	3066
8.49333	85	1	894	2146	3736	2246	1	1	1	2445	1	1147.2		1	1	1	2987	1	254	1	463.714	8.49333	0	85		1163	1	1276	1828	1	1111	896.667	8.49333	0	85		1	1	1	1	1	8.49333	0	85		1	1	1	1
8.49417	207	7682	12856	8772	11624	5297	7279	2496	7213	6541	4013	7377.3		2337	4243	1	1	1893	5362	1446	2183.29	8.49417	-5194.01	207		12269	1	6548	8765	1	4380	5327.33	8.49417	0	207		1	755	1	1	189.5	8.49417	-7187.8	207		8152	1	1	16148
8.495	191	711	1567	965	1274	504	709	1	830	688	461	771		1	419	1	1	1	627	314	194.857	8.495	-576.143	191		1442	1	627	829	1	455	559.167	8.495	0	191		1	1	1	1	1	8.495	-770	191		844	1	12	1971
8.49583	299	62	1020	693	911	392	561	162	558	497	1	485.7		171	324	1	1	1	1	1	71.4286	8.49583	-414.271	299		996	107	518	658	1	339	436.5	8.49583	0	299		6	53	1	1	15.25	8.49583	-470.45	299		650	1	52	1269
8.49667	193	186	779	618	524	192	280	159	286	284	165	347.3		1	149	1	236	1	80	1	67	8.49667	-280.3	193		603	1	294	276	1	147	220.333	8.49667	0	193		1	1	1	1	1	8.49667	-346.3	193		1	96	26	792
8.4975	525	1	1	1	28	1	1	11	1	1	1	4.7		1	1	1	1	1	1	1	1	8.4975	0	525		1	1	1	1	1	1	1	8.4975	0	525		1	1	1	1	1	8.4975	0	525		1	1	1	25
8.49833	192	97	312	113	230	106	111	43	156	136	81	138.5		1	1	1	412	1	1	50	66.7143	8.49833	0	192		364	1	139	192	1	29	121	8.49833	0	192		1	1	138	1	35.25	8.49833	-103.25	192		1	36	1	400
8.49917	229	1	93	125	1	1	37	52	1	1	1	31.3		36	9	1	1	85	1	1	19.1429	8.49917	0	229		53	1	1	1	1	86	23.8333	8.49917	0	229		2	4	63	1	17.5	8.49917	0	229		1	1	23	15
8.5	418	1	1	1	69	1	1	1	1	1	1	7.8		1	1	1	1	1	1	1	1	8.5	0	418		1	1	1	1	1	1	1	8.5	0	418		1	1	1	27	7.5	8.5	0	418		1	1	1	1
8.50083	104	65	1	1	316	1	1	1	1	1	1	38.9		1	39	20	367	1	300	1	104.143	8.50083	0	104		1	215	1	495	1	187	150	8.50083	0	104		1	1	1	1	1	8.50083	0	104		1	1	1	84
8.50167	68	22	64	1	28	1	1	1	1	1	45	16.5		1	1	1	165	1	51	1	31.5714	8.50167	0	68		66	1	1	98	1	68	39.1667	8.50167	0	68		1	7	1	1	2.5	8.50167	0	68		1	1	1	1
8.5025	69	1	3090	1	529	189	1	1	2967	171	1	695.1		129	1	2343	111	1	1	1	369.571	8.5025	0	69		226	179	275	937	531	187	389.167	8.5025	0	69		141	12	1	1	38.75	8.5025	0	69		1	1	251	1
8.50333	110	1	65	1	1	67	1	88	59	1	122	40.6		1	1	1	155	1	11	1	24.4286	8.50333	0	110		1	222	19	123	1	121	81.1667	8.50333	0	110		1	1	91	46	34.75	8.50333	0	110		1	108	1	14
8.50417	322	1	1	1	1	1	1	1	1	1	1	1		1	1	1	1	1	1	1	1	8.50417	#DIV/0!	322		1	1	1	1	1	1	1	8.50417	#DIV/0!	322		1	1	1	1	1	8.50417	#DIV/0!	322		88	1	1	1
8.505	131	170	258	781	1	1828	1	1	1	166	1	320.8		1	1	1	2805	1	2317	1	732.429	8.505	0	131		1239	1	974	1459	1	1116	798.333	8.505	0	131		77	1	1109	1	297	8.505	0	131		1	1	1	1
8.50583	65	326	1	1	1	159	259	347	153	1	56	130.4		1	1	1	1	787	1	1	113.286	8.50583	0	65		324	1	1	1	1	106	72.3333	8.50583	0	65		1	1	286	643	232.75	8.50583	0	65		2644	138	1	1
8.50667	103	1	1	1	3949	1779	1	1	1	2153	1	788.8		1	1	1	2522	1	1	1	361.143	8.50667	0	103		709	1	1298	1604	1	302	652.5	8.50667	0	103		1	2296	1	1	574.75	8.50667	0	103		1	312	1	1
8.5075	95	34	137	414	370	224	459	1	647	758	542	358.6		255	1	1	453	1	1103	1	259.286	8.5075	0	95		399	1	335	464	1	468	278	8.5075	0	95		1	1	1	1	1	8.5075	-357.6	95		1	314	1	1
8.50833	70	1	1602	158	1	1	1	1	1	1	240	200.7		1	1	1	1	1	772	674	207.286	8.50833	0	70		1	1	1	1	1	1	1	8.50833	0	70		221	204	1	1	106.75	8.50833	0	70		1	1	87	1
8.50917	132	1	336	1	1	1080	1	1	1	176	11	160.9		1	1	1	1297	1	301	83	240.714	8.50917	0	132		433	1	563	658	1	329	330.833	8.50917	0	132		1	75	139	1	54	8.50917	0	132		39	1	1	1
8.51	295	1	1	1	1	1	1	1	1	1	1	1		1	1	1	1	1	1	1	1	8.51	#DIV/0!	295		1	149	1	1	1	1	25.6667	8.51	0	295		1	1	1	1	1	8.51	#DIV/0!	295		1	1	1	1
8.51083	296	1	1	1	1	1	1	1	1	1	1	1		1	1	1	1	1	1	1	1	8.51083	#DIV/0!	296		1	6	1	1	1	1	1.83333	8.51083	0	296		1	1	1	18	5.25	8.51083	0	296		1	1	1	1
8.51167	66	392	1	1	134	1	1	1	1	2210	1	274.3		1	1	380	1138	1	25152	1	3810.57	8.51167	0	66		1	1	1	1	1	1	1	8.51167	0	66		644	1025	1	1	417.75	8.51167	0	66		1	1	1	1
8.5125	157	1	1	1	1	1	1	1109	1	1	1	111.8		1	1	1	1	1	641	283	132.714	8.5125	0	157		1	997	1	1	729	1	288.333	8.5125	0	157		553	430	1307	1	572.75	8.5125	0	157		234	713	754	1
8.51333	73	1	15320	1	1	2566	1	1	6924	5763	1	3057.9		3030	1	1	1	1	1	39206	6034.43	8.51333	0	73		1	1	1	1	1	3122	521.167	8.51333	0	73		1	3953	1	1	989	8.51333	0	73		1	1	1	1
8.51417	118	1	1	1	1	1	1	1	1	1	1	1		1	1	1	205	763	1	1	139	8.51417	0	118		59	1	1	1	1	1	10.6667	8.51417	0	118		76	203	589	659	381.75	8.51417	380.75	118		1	337	1	1
8.515	74	1	1	1	572	1	1	1	1	124	1	70.4		84	88	1	2401	518	1	1935	718.286	8.515	0	74		1	1	96	839	1	47	164.167	8.515	0	74		1	1	1	1	1	8.515	0	74		1	115	1	1231
8.51583	83	159	1	177	1482	1	1	1811	1	1755	1946	733.4		851	1203	1	1187	1111	2352	219	989.143	8.51583	0	83		1757	1272	1077	1746	247	1295	1232.33	8.51583	0	83		593	359	2154	1100	1051.5	8.51583	0	83		1956	1360	386	1
8.51667	188	1	1	1	33	1	1	1	1	1	1	4.2		1	1	1	13	42	1	1	8.57143	8.51667	0	188		1	1	11	1	267	1	47	8.51667	0	188		528	425	8	686	411.75	8.51667	407.55	188		1	1	320	1
8.5175	133	1	714	1	1	75	1	1	1	468	1	126.4		1	1	1	1	1	1	443	64.1429	8.5175	0	133		1015	1	1	1	1	1	170	8.5175	0	133		1	1	1	1	1	8.5175	0	133		1	1	1	577
8.51833	81	44	1683	2632	3366	2499	4859	4669	6711	5909	6636	3900.8		2675	1232	1	2224	1388	5121	1	1806	8.51833	0	81		4015	2636	3325	4563	4030	4316	3814.17	8.51833	0	81		1941	2866	5858	1980	3161.25	8.51833	0	81		689	4026	3968	1
8.51917	195	1	1	250	387	145	218	1	234	188	123	154.8		70	98	1	1	1	148	1	45.7143	8.51917	0	195		440	1	1	317	1	1	126.833	8.51917	0	195		1	1	31	49	20.5	8.51917	0	195		40	1	1	594
8.52	103	1	1	1	1	1	1	1	112	1	1	12.1		1	1	1	1	356	489	1	121.429	8.52	0	103		1	348	1	1	1	1	58.8333	8.52	0	103		1	1	155	339	124	8.52	111.9	103		1	1	1	160
8.52083	194	1	114	1	1	1	26	1	54	1	7	20.7		1	1	1	1	1	1	1	1	8.52083	0	194		102	1	1	1	1	1	17.8333	8.52083	0	194		1	1	1	1	1	8.52083	0	194		1	1	1	105
8.52167	119	1	1	1	1	1	1	1	1	1	1	1		27	1	1	1	1	200	1	33.1429	8.52167	0	119		153	1	1	1	1	1	26.3333	8.52167	0	119		1	1	1	1	1	8.52167	#DIV/0!	119		1	1	1	1
8.5225	121	1	1	1	1	1	1	1	1	1	1	1		1	1	1	1	1	1	1	1	8.5225	#DIV/0!	121		1	1	1	1	1	1	1	8.5225	#DIV/0!	121		1	1	1	1	1	8.5225	#DIV/0!	121		1	1	1	1
8.52333	78	1	19	51	364	1	312	385	1	167	12	131.3		1	1	1	1	404	1	1	58.5714	8.52333	0	78		1	1	1	477	1	1	80.3333	8.52333	0	78		1	1	1371	1	343.5	8.52333	0	78		1	1	1	655
8.52417	179	1	73	51	31	1	1	160	52	9	95	47.4		1	164	1	159	336	165	82	129.714	8.52417	0	179		112	126	1	1	114	1	59.1667	8.52417	0	179		216	170	220	193	199.75	8.52417	152.35	179		377	176	130	103
8.525	477	1	18	1	1	1	1	7	1	1	1	3.3		9	1	1	1	1	1	1	2.14286	8.525	0	477		1	1	1	1	1	1	1	8.525	0	477		1	1	1	1	1	8.525	0	477		1	1	1	1
8.52583	177	1	228	97	211	17	90	1	14	80	54	79.3		1	24	1	414	1	70	1	73.1429	8.52583	0	177		230	1	17	96	69	12	70.8333	8.52583	0	177		1	56	1	1	14.75	8.52583	0	177		1	1	75	285
8.52667	127	1	1	1	1	1	1	512	1	1	1	52.1		1	10	1	1	153	1	1	24	8.52667	0	127		128	250	1	1	354	10	124	8.52667	0	127		203	1	520	266	247.5	8.52667	0	127		1	453	356	1
8.5275	373	1	1	1	1	1	1	1	1	1	1	1		1	1	1	1	1	1	1	1	8.5275	#DIV/0!	373		1	1	1	1	1	1	1	8.5275	#DIV/0!	373		1	1	1	30	8.25	8.5275	0	373		1	1	1	1
8.52833	185	1	1	1	1	1	1	1	1	7	30	4.5		1	81	1	1	1	44	1	18.5714	8.52833	0	185		1	38	1	1	1	1	7.16667	8.52833	0	185		83	1	75	1	40	8.52833	35.5	185		1	43	1	8
8.52917	165	1	90	19	125	1	31	1	16	23	30	33.7		1	1	1	190	1	1	1	28	8.52917	0	165		23	1	41	19	1	1	14.3333	8.52917	0	165		12	30	1	1	11	8.52917	0	165		1	1	58	89
8.53	522	1	1	1	1	1	1	1	1	1	1	1		1	1	1	1	1	1	1	1	8.53	#DIV/0!	522		1	1	1	1	1	1	1	8.53	#DIV/0!	522		1	1	1	31	8.5	8.53	0	522		1	1	1	1
8.53083	84	293	886	792	1	1	652	128	726	1	426	390.6		1	1	1	249	147	817	1	173.857	8.53083	0	84		85	738	1	258	1	1	180.667	8.53083	0	84		71	74	1	1	36.75	8.53083	0	84		1	619	1	1
8.53167	87	1	1	1	1	1	1	1	1	1	1	1		77	1	427	1	309	1	1	116.714	8.53167	0	87		1	1	1	148	1	100	42	8.53167	0	87		136	263	1	126	131.5	8.53167	130.5	87		1	1	1	361
8.5325	80	1	54	491	1	272	1	182	1	1	1	100.5		1	211	1	215	1009	1	1	205.571	8.5325	0	80		144	422	1	364	1	1	155.5	8.5325	0	80		293	138	731	1	290.75	8.5325	0	80		1	187	493	133
8.53333	126	151	536	93	1	9	502	57	591	428	301	266.9		214	1	1	1	1	527	257	143.143	8.53333	0	126		83	1	13	1	6	1	17.5	8.53333	-249.4	126		6	1	1	1	2.25	8.53333	-264.65	126		1	342	7	1
8.53417	72	1	1	1	1	1	1	1	1	1	1	1		1	1	1	1	205	1	1	30.1429	8.53417	0	72		1	1	1	1	1	1	1	8.53417	#DIV/0!	72		1	141	1	1	36	8.53417	0	72		1	1	1	1
8.535	143	1	1	1	1	1	1	1	1	1	5	1.4		1	1	1	1	1	1	1	1	8.535	0	143		1	1	1	1	1	1	1	8.535	0	143		184	1	1	1	46.75	8.535	0	143		1	6	57	1
8.53583	148	1	1028	1	1	1	1504	1	1	1309	1	384.8		1	1	1	1	725	5972	1	957.429	8.53583	0	148		1	1	1	1	1	1120	187.5	8.53583	0	148		1295	1	1	514	452.75	8.53583	0	148		1	1	1	1
8.53667	99	41	1	1	1	1	1	472	1	1	1	52.1		1	1	1	1	1	1	234	34.2857	8.53667	0	99		1	253	1	1	512	1	128.167	8.53667	0	99		272	1	758	206	309.25	8.53667	0	99		1	339	1	1
8.5375	68	1	1	1	1	1	1	36	1	22	1	6.6		1	1	1	1	1	1	1	1	8.5375	0	68		1	1	1	1	1	1	1	8.5375	0	68		1	1	1	1	1	8.5375	0	68		1	1	1	1
8.53833	120	1	360	1	1	1	1	1	1	1	550	91.8		1	1	1	1	1	1	1	1	8.53833	0	120		1	1	1	1	1	1	1	8.53833	0	120		1	1	1	1	1	8.53833	0	120		1	1	1	939
8.53917	168	525	904	722	1	1	998	1	1004	825	639	562		1	910	1	1	1	896	576	340.857	8.53917	0	168		1	1	1	1	1	1	1	8.53917	-561	168		4	7	146	1	39.5	8.53917	-522.5	168		1	720	1	1
8.54	83	1	286	1	1	1	1	1	1	1	1	29.5		1	1	1473	1	638	1	1	302.286	8.54	0	83		1	1	1	347	1046	1	232.833	8.54	0	83		1	876	1	1	219.75	8.54	0	83		1	1	1114	289
8.54083	73	1	1	1	1	1	1	1	1	1	1	1		1	1	1	1	6609	1	1	945	8.54083	0	73		1	1	1	1	1	1	1	8.54083	#DIV/0!	73		1	1	1	5248	1312.75	8.54083	0	73		1	1	1	1
8.54167	88	49	140	13	1	1	1	9	1	1	152	36.8		84	210	1	1	1	1	1	42.7143	8.54167	0	88		1	1	1	1	1	1	1	8.54167	0	88		1	35	95	1	33	8.54167	0	88		334	1	66	95
8.5425	79	1	1	1	1	136	1	54305	18817	1067	1	7433.1		1	1	1807	1151	1	1	1	423.286	8.5425	0	79		1	18909	1	1	1	1	3152.33	8.5425	0	79		1	2618	15541	1	4540.25	8.5425	0	79		1	1	1	1
8.54333	140	1	161	161	13	1	105	1	123	107	118	79.1		53	70	130	1	1	98	124	68.1429	8.54333	0	140		1	66	1	1	1	1	11.8333	8.54333	-67.2667	140		1	1	1	1	1	8.54333	-78.1	140		1	123	1	357
8.54417	117	474	1	565	299	237	1	1	658	284	762	328.2		1	817	1	189	337	1	1	192.429	8.54417	0	117		506	1	307	1	1	1	136.167	8.54417	0	117		766	1538	1	1	576.5	8.54417	0	117		1270	1	940	992
8.545	74	111	1	3462	4066	4920	1	1	1	3792	1	1635.6		1978	1	1	3441	284	1	1	815.286	8.545	0	74		1997	1	3408	5408	1	3280	2349.17	8.545	0	74		1	1	1	1	1	8.545	0	74		335	1	1	7231
8.54583	170	1	60	82	1	1	1	1681	1	48	60	193.6		61	1	1	1	341	1	1	58.1429	8.54583	0	170		1	927	1	1	1376	57	393.833	8.54583	0	170		591	861	1995	1	862	8.54583	0	170		1	1370	1417	132
8.54667	86	416	1715	1	134	1	1	1	357	1	203	283		1	12	1	1	1	1	1	2.57143	8.54667	0	86		1	1	1	1	1337	1	223.667	8.54667	0	86		1	2668	1	3822	1623	8.54667	0	86		1	1	1680	207
8.5475	106	1588	1	1	1	1	61	1	1	896	746	329.7		1	770	1	1	1	1	392	166.714	8.5475	0	106		1	1	1597	1944	1332	1	812.667	8.5475	0	106		1	1	1	1	1	8.5475	0	106		1	1	1	149
8.54833	355	1	1	1	1	1	1	1	16	1	1	2.5		1	1	1	1	1	1	1	1	8.54833	0	355		1	29	1	1	1	1	5.66667	8.54833	0	355		1	1	1	1	1	8.54833	0	355		1	1	1	1
8.54917	250	1	1	1	1	1	1	316	1	1	1	32.5		1	1	1	1	241	1	1	35.2857	8.54917	0	250		1	148	1	1	102	1	42.3333	8.54917	0	250		76	66	246	173	140.25	8.54917	0	250		1	227	109	1
8.55	232	1	145	120	1	1	63	78	57	61	16	54.3		50	46	1	1	63	70	119	50	8.55	0	232		51	27	49	93	5	88	52.1667	8.55	0	232		1	20	47	57	31.25	8.55	0	232		1	61	1	129
8.55083	147	2256	1	4475	1	1	1	9422	1	16648	1	3280.7		6472	1	1	1	7225	1	4528	2604.14	8.55083	0	147		1	1	1	1	1	13742	2291.17	8.55083	0	147		15657	1	1	1	3915	8.55083	0	147		1	1	4463	1
8.55167	385	1	1	1	1	1	1	17	1	1	1	2.6		1	1	1	1	1	1	1	1	8.55167	0	385		1	1	1	25	1	1	5	8.55167	0	385		1	1	1	1	1	8.55167	0	385		1	1	1	1
8.5525	171	21	1	1	1	1	1	223	1	6	1	25.7		1	1	1	1	11	1	1	2.42857	8.5525	0	171		1	103	1	1	181	1	48	8.5525	0	171		55	64	240	82	110.25	8.5525	0	171		1	198	183	1
8.55333	159	1	164	1	908	574	1	1	1	1	1	165.3		1	37	1	703	68	1	1	116	8.55333	0	159		246	55	242	300	75	178	182.667	8.55333	0	159		1	1	136	54	48	8.55333	0	159		1	65	45	1
8.555	169	1	54	7	13	10	1	477	1	62	1	62.7		1	1	1	12	127	1	11	22	8.555	0	169		1	306	1	1	416	54	129.833	8.555	0	169		194	304	612	172	320.5	8.555	257.8	169		1	1	387	1
8.55583	64	1	1	1	1	1	67	1	1	9	1	8.4		1	1	1	1	286	1	83	53.4286	8.55583	0	64		1	1	1	1	60	1	10.8333	8.55583	0	64		1	165	1	42	52.25	8.55583	0	64		657	27	145	149
8.55667	129	1	1	162	1	1	1	1	1	1	1	17.1		40	1	638	1	1	1	1	97.5714	8.55667	0	129		87	1	192	1	285	1	94.5	8.55667	0	129		106	1	1	1	27.25	8.55667	0	129		1	1	330	1
8.5575	442	1	1	2	1	1	1	1	1	1	1	1.1		1	1	1	1	1	1	1	1	8.5575	0	442		1	1	1	1	1	1	1	8.5575	0	442		1	1	1	24	6.75	8.5575	0	442		1	1	1	1
8.55833	299	1	1	1	21	1	1	369	1	1	307	70.4		1	1	179	1	197	396	1	110.857	8.55833	0	299		1	190	1	1	139	1	55.5	8.55833	0	299		1	1	343	163	127	8.55833	0	299		1	218	128	14
8.55917	247	1	1	1	1	1	1	1	1	1	1	1		1	1	33	1	1	1	1	5.57143	8.55917	0	247		9	1	1	1	1	1	2.33333	8.55917	0	247		1	1	1	1	1	8.55917	#DIV/0!	247		1	1	1	1
8.56	121	1	1	1	1	1	1	1	1	1	1	1		1	1	1	1	1	1	1	1	8.56	#DIV/0!	121		1	1	1	1	1	1	1	8.56	#DIV/0!	121		1	1	1	1	1	8.56	#DIV/0!	121		1	1	1	1
8.56083	107	1	1	75	1	1	81	1	100	1	44	30.6		1	1	1	21	1	1	1	3.85714	8.56083	0	107		353	1	243	1	1	52	108.5	8.56083	0	107		1	105	1	1	27	8.56083	0	107		1	1	33	297
8.56167	185	1	1	45	13	1	1	1	1	48	53	16.5		1	494	280	75	296	338	1	212.143	8.56167	195.643	185		1	206	1	1	208	7	70.6667	8.56167	0	185		1	129	570	228	232	8.56167	215.5	185		516	266	227	1
8.5625	111	1	1	1	390	89	1	3295	1	8	1	378.8		1	1	1	1	1116	1	1	160.286	8.5625	0	111		92	1922	1	176	2835	1	837.833	8.5625	0	111		1374	2135	4207	1446	2290.5	8.5625	1911.7	111		603	2867	2771	66
8.56333	119	57	3883	332	1	92	487	1	1	1	1	485.6		159	1	32967	1	1010	1	1	4877.14	8.56333	0	119		1	1	1	1	1	116	20.1667	8.56333	0	119		1	1	1843	1	461.5	8.56333	0	119		1293	1	1	141
8.56417	100	5	131	59	1	1	1	1348	1	27	1	157.5		1	1972	1	1	1950	1	1	561	8.56417	0	100		1	1	27	1	1	1	5.33333	8.56417	0	100		1	1391	1	1807	800	8.56417	0	100		4051	1	1	1
8.565	114	1	680	1	1	1	1	3004	5291	1	2965	1194.6		1	3974	4891	1	3602	3769	1	2319.86	8.565	0	114		1	1937	1	1	1	1	323.667	8.565	0	114		1	1	5106	1	1277.25	8.565	0	114		7043	1950	1	653
8.56583	149	1	1	1139	1	1	1	1	1	1931	1	307.8		1110	1	1	1	1	1	109	174.857	8.56583	0	149		1	1	1	308	1	148	76.6667	8.56583	0	149		1	1	1	1	1	8.56583	0	149		555	1	724	375
8.56667	296	1	1	1	1	1	1	1	1	1	1	1		1	1	1	1	1	1	1	1	8.56667	#DIV/0!	296		1	1	1	1	1	1	1	8.56667	#DIV/0!	296		1	1	1	1	1	8.56667	#DIV/0!	296		1	1	1	1
8.5675	113	1	230	1	1	1	1	1	1	363	1	60.1		1	1	6400	1	167	1	1	938.857	8.5675	0	113		1	323	1	1	1	1	54.6667	8.5675	0	113		1	1	1	208	52.75	8.5675	0	113		346	388	1	1
8.56833	207	719	3204	3169	410	849	1653	4620	1144	943	463	1717.4		1910	1118	3479	785	2398	2292	1	1711.86	8.56833	0	207		834	3853	606	839	1777	1962	1645.17	8.56833	0	207		889	1263	4465	2246	2215.75	8.56833	0	207		1707	2676	1973	5369
8.56917	127	1	1	1	1	1	1	114	61	1	62	24.4		1	1	1	1	1	158	1	23.4286	8.56917	0	127		15	1	1	1	1	1	3.33333	8.56917	0	127		1	260	120	1	95.5	8.56917	0	127		1	86	1	1
8.57	208	1	589	560	50	176	325	831	220	153	1	290.6		330	207	653	29	1	1	1	174.571	8.57	0	208		141	548	70	31	283	358	238.5	8.57	0	208		109	189	793	367	364.5	8.57	0	208		1	476	305	993
8.57083	223	1	5	1	1	1	28	1	1	1	20	6		1	1	1	1	1	1	1	1	8.57083	0	223		1	90	1	1	1	1	15.8333	8.57083	0	223		1	1	90	1	23.25	8.57083	0	223		1	1	27	1
8.57167	177	1	100	76	1	1	116	1	1	22	1	32		64	37	1	1	1	1	1	15.1429	8.57167	0	177		1	1	1	1	1	12	2.83333	8.57167	0	177		1	1	1	1	1	8.57167	0	177		1	1	1	120
8.5725	425	1	1	1	63	1	1	1	1	1	1	7.2		1	1	1	1	1	1	1	1	8.5725	0	425		1	1	1	1	1	1	1	8.5725	0	425		1	1	16	1	4.75	8.5725	0	425		1	1	1	1
8.57333	105	1	267	523	1	1	1	1	1	135	1	93.2		116	1	1	140	157	1	1	59.5714	8.57333	0	105		1	1	149	27	1	143	53.6667	8.57333	0	105		1	1	1	13	4	8.57333	0	105		757	1	1	158
8.57417	295	1	1	1	1	1	1	1	1	1	1	1		1	1	1	1	1	1	1	1	8.57417	#DIV/0!	295		1	1	1	1	1	1	1	8.57417	#DIV/0!	295		1	1	1	1	1	8.57417	#DIV/0!	295		1	1	1	1
8.575	147	1	1	1	1	1	1	1	1	1	1	1		1	1	1	1	1	1	1	1	8.575	#DIV/0!	147		1	1	1	1	1	19288	3215.5	8.575	0	147		1	1	1	1	1	8.575	#DIV/0!	147		3594	1	1	1
8.57583	68	44	1	1	1	162	1	1	1	37	1	25		39	114	1	91	1	1	1	35.4286	8.57583	0	68		1	1	1	79	1	1	14	8.57583	0	68		1	1	1	1	1	8.57583	0	68		1	1	10	66
8.57667	163	1	123	92	1	1	134	1	134	1	1	48.9		9	1	408	1	1	1	1	60.2857	8.57667	0	163		1	18	1	1	6	23	8.33333	8.57667	0	163		1	1	1	1	1	8.57667	0	163		1	1	7	171
8.5775	528	1	1	13	57	1	1	1	1	13	1	9		1	1	1	1	1	1	1	1	8.5775	0	528		1	1	1	1	1	1	1	8.5775	0	528		1	1	1	1	1	8.5775	0	528		1	1	1	1
8.57833	78	1	1	1	127	1	1	91	1	1	135	36		84	1	1	338	1	1	1	61	8.57833	0	78		1	1	1	1	1	1	1	8.57833	0	78		1	1	1	25	7	8.57833	0	78		60	1	1	490
8.57917	133	1	928	1345	1	361	1	1	1	593	1	323.3		534	1	1	184	1	1	105	118.143	8.57917	0	133		32	1	1	250	1	424	118.167	8.57917	0	133		1	1	1	1	1	8.57917	0	133		416	1	1	1379
8.58	192	1	141	1	1	1	138	1	1	1	1	28.7		69	1	1	1	1	1	1	10.7143	8.58	0	192		1	107	1	1	46	760	152.667	8.58	0	192		1	1	1	1	1	8.58	0	192		1	1	1	216
8.58083	191	1	701	647	1	171	250	475	196	157	89	268.8		387	179	945	126	1	642	1	325.857	8.58083	0	191		139	135	58	131	185	403	175.167	8.58083	0	191		1	1	327	1	82.5	8.58083	0	191		274	286	88	1075
8.58167	126	1	1	350	1	1	1	247	1	1	134	73.8		1	345	192	554	1	365	1	208.429	8.58167	0	126		1	284	1	1	290	217	132.333	8.58167	0	126		1	1	664	1	166.75	8.58167	0	126		1	1	71	360
8.5825	80	1	66	1	1	1	201	1	1	1	14	28.8		1	1	1	1	367	1	1	53.2857	8.5825	0	80		1	1	1	203	1	1	34.6667	8.5825	0	80		1	1	1	209	53	8.5825	0	80		1318	67	8	1
8.58333	73	1	22267	38583	35128	51323	1	1	1	37665	1	18497.1		20951	1	1	35582	1	1	1	8076.86	8.58333	0	73		1	1	22182	66741	1	35806	20788.7	8.58333	0	73		1	1	1	1	1	8.58333	0	73		7227	1	1	84136
8.58417	103	1	1	1	1	375	1	1	1	136	1	51.9		1	1	1	72	1	1	115	27.4286	8.58417	0	103		117	1	112	261	1	60	92	8.58417	0	103		1	1	1	1	1	8.58417	0	103		1	1	1	384
8.585	91	1	328	152	1	1	1	1	1	124	1	61.1		151	1	1	147	1	1	1	43.2857	8.585	0	91		1	1	1	1	1	1	1	8.585	0	91		1	1	1	1	1	8.585	0	91		1058	1	194	1
8.58583	128	108	1	25	117	1	1	1	1	1	1	25.7		1	99	1	1	1	1	1	15	8.58583	0	128		1	1	1	1	1	1	1	8.58583	0	128		1	18	1	1	5.25	8.58583	0	128		75	1	1	1
8.58667	77	1	306	482	462	448	1	1	1	348	1	205.1		25	1	1	1194	1	1	1	174.857	8.58667	0	77		1261	1	403	1409	1	1351	737.667	8.58667	532.567	77		1	1	1	1	1	8.58667	0	77		1	1	1	654
8.5875	398	1	1	1	90	1	1	1	1	23	1	12.1		1	1	1	1	1	1	1	1	8.5875	0	398		1	1	1	1	1	1	1	8.5875	0	398		1	1	1	1	1	8.5875	0	398		1	1	1	1
8.58833	84	96	111	1	1	1	1	619	1	1	188	102		1	842	1	1266	1	1	542	379.143	8.58833	0	84		1	1	1	1	1	1	1	8.58833	0	84		1	1	1	1	1	8.58833	0	84		31	1	1	175
8.58917	104	403	234	575	36	536	1	1	1	282	435	250.4		424	1	1	246	1	1	1	96.4286	8.58917	0	104		1	1	118	95	41	297	92.1667	8.58917	0	104		1	1	1	1	1	8.58917	0	104		1	1	75	289
8.59	114	4748	1	4225	6713	4335	4292	1	1	4565	1	2888.2		2370	1	1	7899	1	1623	6157	2578.86	8.59	0	114		4653	1	5016	5648	2398	3184	3483.33	8.59	0	114		2192	1	1	1	548.75	8.59	0	114		1	752	2467	611
8.59083	81	159	1	1	1	1	364	1	1	232	1	76.2		1	1	24761	1	1	1	28231	7571	8.59083	0	81		1	8490	1	1	6234	1	2454.67	8.59083	0	81		9719	1	10044	1	4941.25	8.59083	4865.05	81		1	1	6983	68
8.59167	101	1128	1176	1333	1306	934	1	272	88	881	81	720		482	1049	1	1222	240	1	309	472	8.59167	0	101		366	1	785	985	1	574	452	8.59167	0	101		1	91	1	83	44	8.59167	-676	101		362	1	1	1533
8.5925	146	925	749	791	961	1223	953	1	1347	868	1	781.9		516	1	1	1413	1	1	1	276.286	8.5925	0	146		1181	1	870	1645	1	689	731.167	8.5925	0	146		1	1	120	1	30.75	8.5925	-751.15	146		1	1	1	2792
8.59333	115	217	761	1836	1520	2119	2792	1	1	1852	1	1110		960	1	1	1304	295	1	8775	1619.57	8.59333	0	115		1422	1	1619	1810	1	1290	1023.83	8.59333	0	115		1	1	1	447	112.5	8.59333	0	115		930	1	1	2335
8.59417	145	6957	6399	5904	7409	9029	5865	1	8844	6434	7940	6478.2		3446	6095	1415	11200	210	8446	3049	4837.29	8.59417	0	145		9653	1	7206	12911	1	5237	5834.83	8.59417	0	145		166	142	1	1	77.5	8.59417	-6400.7	145		10430	1	1	20283
8.595	233	1	1	1	1	1	1	1	1	1	1	1		1	1	80	1	1	1	1	12.2857	8.595	0	233		1	1	1	1	1	1	1	8.595	#DIV/0!	233		22	1	1	1	6.25	8.595	0	233		1	1	1	1
8.59583	209	1	346	322	1	16	187	474	101	34	25	150.7		183	111	444	1	1	285	1	146.571	8.59583	0	209		17	444	22	1	131	175	131.667	8.59583	0	209		67	98	473	221	214.75	8.59583	0	209		1	1	172	613
8.59667	75	16290	1	11310	9691	13829	16799	1	23494	13092	1	10450.8		7424	1	1	8627	1	1	1	2293.71	8.59667	-8157.09	75		12067	175	9067	17227	5314	7389	8539.83	8.59667	0	75		1	3308	1	1	827.75	8.59667	-9623.05	75		1	1	5389	27696
8.5975	216	1	1	1	1	1	1	1	1	1	1	1		1	1	82	1	1	1	1	12.5714	8.5975	0	216		1	25	1	1	1	1	5	8.5975	0	216		1	32	62	1	24	8.5975	23	216		1	1	1	1
8.59833	512	1	1	1	1	15	1	1	1	1	1	2.4		1	1	29	1	1	1	1	5	8.59833	0	512		1	1	1	1	1	1	1	8.59833	0	512		1	1	1	1	1	8.59833	0	512		1	1	1	1
8.59917	214	1	1	1	1	1	1	1	1	1	1	1		1	1	44	1	1	1	1	7.14286	8.59917	0	214		1	1	1	1	1	1	1	8.59917	#DIV/0!	214		1	1	1	1	1	8.59917	#DIV/0!	214		1	13	1	1
8.6	243	1	1	1	1	1	1	1	1	1	1	1		1	1	1	1	1	1	1	1	8.6	#DIV/0!	243		1	1	1	1	1	1	1	8.6	#DIV/0!	243		5	1	1	1	2	8.6	0	243		1	1	1	1
8.60083	76	1216	512	184	301	946	2011	1	1	770	1	594.3		383	49	1	1027	1	1	1	209	8.60083	0	76		453	1	429	1010	1	501	399.167	8.60083	0	76		1	1	1	1	1	8.60083	0	76		1	1	1	1298
8.60167	99	752	1	612	566	578	940	1	921	574	1	494.6		290	617	1	1	1	1	1593	357.714	8.60167	0	99		261	1	321	563	1	1	191.333	8.60167	0	99		1	1	1	1	1	8.60167	-493.6	99		838	1	83	682
8.6025	106	922	10	1	1768	1	1	1	245	1	1	295.1		112	1	1	1386	2091	1	1	513.286	8.6025	0	106		1476	1299	1	1	1	1010	631.333	8.6025	0	106		1	1476	1	1531	752.25	8.6025	0	106		1	1	1	1
8.60333	418	1	1	1	74	1	1	1	1	1	1	8.3		1	1	1	1	1	1	1	1	8.60333	0	418		1	16	1	1	1	1	3.5	8.60333	0	418		1	1	1	1	1	8.60333	0	418		1	1	1	1
8.60417	96	234	1	1	1	263	295	642	431	471	150	248.9		447	253	332	523	1	708	1	323.571	8.60417	0	96		163	1	323	227	267	419	233.333	8.60417	0	96		1	1	1	572	143.75	8.60417	0	96		395	481	171	1
8.605	132	1	1	301	29	273	1	39	1	1	52	69.9		200	1	1	1	1	1	1	29.4286	8.605	0	132		1	1	67	188	1	99	59.5	8.605	0	132		1	1	1	1	1	8.605	0	132		399	128	65	16
8.60583	143	1143	1	1161	1	1	1156	836	970	659	592	652		385	1	1	1	1	1	898	184	8.60583	-468	143		1	1	1	1	1	1	1	8.60583	-651	143		1	1	1	1	1	8.60583	-651	143		1	1	1	1
8.60667	83	1	1	1	317	355	1	1	1	450	1	112.9		242	233	1	807	1	368	2019	524.429	8.60667	0	83		245	370	258	400	1	1	212.5	8.60667	0	83		1	1	1	232	58.75	8.60667	0	83		324	1	223	3821
8.6075	111	1	1	1	32	1	63	1	1	1	6	10.8		1	1	1	1	1	147	33	26.4286	8.6075	0	111		1	68	1	1	1	1	12.1667	8.6075	0	111		178	1	1	1	45.25	8.6075	0	111		1	176	133	156
8.60833	133	1	1	1	1	1	1	1	1	1	1	1		1	1	1	1	1	1	1	1	8.60833	#DIV/0!	133		1	1	1	1	1	1	1	8.60833	#DIV/0!	133		1	1	1	1	1	8.60833	#DIV/0!	133		964	1	1	82
8.60917	137	1	1	30	135	1	1	1	1	34	1	20.6		1	1	1	69	1	1	1	10.7143	8.60917	0	137		1	1	61	1	1	23	14.6667	8.60917	0	137		1	81	1	1	21	8.60917	0	137		1	1	208	1
8.61	113	1	1	1	569	1	1586	1	1	1	1	216.3		1	1	1	1	1	1	15020	2146.57	8.61	0	113		1	1193	634	1	1	1	305.167	8.61	0	113		1	1	1	1	1	8.61	0	113		1	1	1	585
8.61083	89	1	1	1	1	1	1	1	1	1	1	1		1	1	15891	1	11892	21499	32244	11647	8.61083	11646	89		1	4490	49	1	6087	1	1771.5	8.61083	0	89		1	1	20941	8238	7295.25	8.61083	7294.25	89		778	6964	5149	2878
8.61167	78	1	19	1	1	602	1144	1	1	45	1	181.6		1	1	1	1	1	1	1	1	8.61167	0	78		1	1	129	284	1	1	69.5	8.61167	0	78		1	1	1	1	1	8.61167	0	78		1	1	1	55
8.6125	86	1	1	3931	6866	4418	3584	1	1	4256	1	2306		1	1	1	7407	1	1	1	1059	8.6125	0	86		4578	1	4867	5637	1	2961	3007.5	8.6125	0	86		1	1	1	1	1	8.6125	0	86		1	1	1	1
8.61333	155	1	198	115	1	5	462	3621	280	331	1	501.5		1	1	1	1	1066	1	493	223.429	8.61333	0	155		10	2114	1	1	3123	1	875	8.61333	0	155		1531	2327	4504	1502	2466	8.61333	1964.5	155		495	3168	3079	328
8.615	256	1	1	1	1	1	1	1	1	1	1	1		1	1	1	1	1	1	1	1	8.615	#DIV/0!	256		1	1	1	1	1	1	1	8.615	#DIV/0!	256		1	1	1	1	1	8.615	#DIV/0!	256		1	1	1	1
8.61583	534	1	14	1	1	1	1	1	1	1	1	2.3		1	1	1	1	1	1	1	1	8.61583	0	534		1	1	1	1	1	1	1	8.61583	0	534		1	1	1	1	1	8.61583	0	534		31	1	1	1
8.61667	129	1	1	1	1	1	1	1	1	1	3116	312.5		1	1681	1	1	1	1	1	241	8.61667	0	129		1	1	1	1	1	1	1	8.61667	0	129		1	1	1	1	1	8.61667	0	129		1	1	1	1
8.6175	126	1	1	1	1	1	1	1	1	249	1	25.8		1	340	1	1	1	1	1	49.4286	8.6175	0	126		272	64	313	291	1	145	181	8.6175	155.2	126		239	1	1	1	60.5	8.6175	0	126		1	144	1	1
8.61833	84	1	1	759	985	809	417	1	1	519	1	349.4		337	1	1	1	1	1	1598	277.143	8.61833	0	84		840	1	910	1131	1	630	585.5	8.61833	0	84		1	1	1	1	1	8.61833	0	84		1	1	1	1
8.61917	171	23	120	87	1	1	8	1	124	1	65	43.1		84	1	1505	107	1	228	91	288.143	8.61917	0	171		180	1	8	1	152	9	58.5	8.61917	0	171		145	96	139	1	95.25	8.61917	0	171		1	80	135	165
8.62	163	1	1	1	1	1	3314	3270	3826	1	1377	1179.3		1	3719	2962	1	2243	3576	443	1849.29	8.62	0	163		1	466	1	1	1110	17	266	8.62	0	163		691	569	4008	1501	1692.25	8.62	0	163		3455	1141	941	1
8.62083	462	1	1	22	1	1	1	1	1	1	1	3.1		1	1	1	1	1	1	1	1	8.62083	0	462		1	1	1	1	1	1	1	8.62083	0	462		1	1	1	1	1	8.62083	0	462		68	1	1	1
8.62167	449	1	1	1	1	1	1	1	1	1	1	1		1	41	34	1	1	1	1	11.4286	8.62167	0	449		1	1	1	1	1	1	1	8.62167	#DIV/0!	449		1	1	1	1	1	8.62167	#DIV/0!	449		1	1	1	1
8.62333	97	25	1	1	285	1	1	210	1	1	1	52.7		1	1	949	1	1	1	1	136.429	8.62333	0	97		1	1	1	1	245	135	64	8.62333	0	97		1	177	1	312	122.75	8.62333	0	97		1	143	1	1
8.62417	184	1	1	1	1	1	1	1	1	1	1	1		1	1	70	1	1	1	1	10.8571	8.62417	0	184		1	1	1	1	14	1	3.16667	8.62417	0	184		26	1	38	1	16.5	8.62417	15.5	184		1	1	31	1
8.625	436	1	1	1	83	1	1	1	1	1	1	9.2		1	1	1	1	1	1	1	1	8.625	0	436		1	1	1	1	1	1	1	8.625	0	436		1	1	1	1	1	8.625	0	436		1	1	1	1
8.62583	186	1	101	118	209	105	163	1	144	118	74	103.4		38	1	1	173	2198	1	131	363.286	8.62583	0	186		60	963	86	111	3389	81	781.667	8.62583	0	186		1917	1137	856	1448	1339.5	8.62583	1236.1	186		119	1	3581	1
8.62667	79	73434	1	1	1	1	1	52713	1	1383	22422	14995.8		1	75544	41704	5324	415	1	1	17570	8.62667	0	79		1	1	1	1	23966	1	3995.17	8.62667	0	79		29731	1	19505	1	12309.5	8.62667	0	79		1	1	10965	1
8.6275	183	1	101	153	359	1	140	1	161	253	1	117.1		112	1	43	471	1	174	1	114.714	8.6275	0	183		1	1	337	321	1	185	141	8.6275	0	183		1	1	365	313	170	8.6275	0	183		1	99	270	1
8.62833	201	1	1	1	82	1	1	1	1	1	1	9.1		1	1	350	1	196	1	1	78.7143	8.62833	0	201		1	102	1	1	337	1	73.8333	8.62833	0	201		211	97	1	173	120.5	8.62833	111.4	201		1	1	365	1
8.63083	551	1	1	11	1	1	1	1	1	1	1	2		1	1	1	1	1	1	1	1	8.63083	0	551		1	1	1	1	1	1	1	8.63083	0	551		1	1	1	1	1	8.63083	0	551		1	1	1	1
8.6325	139	48	80	1	348	151	283	471	1	1	1	138.5		1	1	5786	1	1	1	1	827.429	8.6325	0	139		1	222	179	277	368	1	174.667	8.6325	0	139		1	1	1	1	1	8.6325	0	139		1	311	1	1
8.63333	505	1	1	1	1	15	16	1	1	1	1	3.9		1	1	1	1	1	1	1	1	8.63333	0	505		1	1	1	1	1	1	1	8.63333	0	505		1	1	22	1	6.25	8.63333	0	505		1	1	1	1
8.63417	219	1	1	1	1	1	1	1	1	1	1	1		1	1	448	1	1	45	1	71.1429	8.63417	0	219		1	34	1	1	1	1	6.5	8.63417	0	219		4	1	46	1	13	8.63417	0	219		1	1	1	1
8.635	72	1	1	1	1477	1490	1	1	1	1	1	297.5		1	1	323468	1	1	1	1	46210.6	8.635	0	72		824	1	1	1	1	1	138.167	8.635	0	72		1	1	1	1	1	8.635	0	72		754	1	1	971
8.63667	69	1	1	2640	1	287	2138	1	20156	1437	1	2666.3		1326	2270	40843	5218	1	1	1	7094.29	8.63667	0	69		2447	6671	2914	3749	1	2092	2979	8.63667	0	69		1	64	1	1	16.75	8.63667	0	69		1	1	1	1
8.6375	279	1	1	1	1	1	1	1	1	1	1	1		1	1	16	1	1	1	1	3.14286	8.6375	0	279		1	5	1	1	1	1	1.66667	8.6375	0	279		1	1	1	1	1	8.6375	#DIV/0!	279		1	1	1	1
8.63833	120	1	1	1	3012	1	1610	1	1	1	1	463		1	1	23496	1	1	1	1	3357.43	8.63833	0	120		1	3230	1	1	1	391	604.167	8.63833	0	120		5009	2889	1	1	1975	8.63833	0	120		5049	1319	1	1
8.63917	95	1	1	254	223	1	1	1	1	1	1	48.5		1	1	2530	407	122	1	1	437.571	8.63917	0	95		110	1	14	118	1	104	58	8.63917	0	95		261	125	1	1	97	8.63917	0	95		1	1	1	1
8.64	143	1	1170	1	1491	424	1	1	1	1	1	309.2		1	1	6060	1363	1	1	1	1061.14	8.64	0	143		544	1	825	990	827	513	616.667	8.64	0	143		857	1	1	1	215	8.64	0	143		495	1	1022	1
8.64083	96	1	1	1	1	1	1	305	1	1	1	31.4		1	1	2285	1	657	1	468	487.714	8.64083	0	96		1	725	1	1	475	1	200.667	8.64083	0	96		764	549	1006	1	580	8.64083	548.6	96		1	1	576	1
8.64167	202	1	7	1	1	1	1	1	1	1	1	1.6		1	1	209	1	1	36	8	36.7143	8.64167	0	202		1	1	1	1	65	1	11.6667	8.64167	0	202		58	1	1	1	15.25	8.64167	0	202		1	28	78	1
8.6425	281	1	1	1	1	1	1	1	4	1	1	1.3		1	1	97	1	1	1	1	14.7143	8.6425	0	281		29	1	1	1	1	1	5.66667	8.6425	0	281		1	1	1	1	1	8.6425	0	281		1	1	1	25
8.64333	78	1	1	1	910	1	1	1	1	1	1	91.9		1	1	76088	1	1	1	1	10870.6	8.64333	0	78		1	1	1	1	1	1	1	8.64333	0	78		1	1	1	1	1	8.64333	0	78		3397	1	1	187
8.64417	74	1	1	30060	1	1	1	11544	42080	1	1	8369.1		1	1	332466	1	14217	1	1	49526.9	8.64417	0	74		1	1	1	1	1	1	1	8.64417	0	74		1	1	1	1	1	8.64417	0	74		16809	13475	1	8401
8.645	148	1	1348	7523	1	882	16365	15826	1	1969	1	4391.7		2128	13104	292825	2873	12944	1	1	46268	8.645	0	148		1	12939	1	1	1	1	2157.33	8.645	0	148		1	1	24706	8757	8366.25	8.645	0	148		17687	8293	1	1
8.64583	147	1	1	76553	1	1	119603	121741	1	21552	1	33945.5		12491	84389	1627124	6930	79385	1	1	258617	8.64583	0	147		9122	138487	1	14592	1	1	27034	8.64583	0	147		1	1	151610	39950	47890.5	8.64583	0	147		103324	53564	1	6504
8.64667	163	1815	613	2865	1707	1628	1	1	1	1764	1	1039.6		2675	1	1	1120	1	1128	3431	1193.86	8.64667	0	163		306	868	312	346	649	590	511.833	8.64667	0	163		1164	702	942	1	702.25	8.64667	0	163		1	1	686	433
8.6475	136	1	59	133	1	1	8	1	1	1	1	20.7		7	1	15830	241	1	155	1	2319.43	8.6475	0	136		64	41	1	1	1	186	49	8.6475	0	136		1	1	1	1	1	8.6475	0	136		1	76	7	20
8.64833	239	1	1	1	1	1	1	1	1	1	49	5.8		1	1	155	1	1	1	1	23	8.64833	0	239		1	1	1	1	1	1	1	8.64833	0	239		22	1	1	1	6.25	8.64833	0	239		1	1	1	1
8.64917	210	1	1	9	1	1	1	1	43	1	1	6		9	1	990	19	1	1	72	156.143	8.64917	0	210		1	53	12	1	1	1	11.5	8.64917	0	210		1	1	1	1	1	8.64917	0	210		1	1	1	1
8.65	132	5050	1	5437	3681	1	5152	6421	8238	1	1	3398.3		4483	6103	70611	1	4284	8258	1	13391.6	8.65	0	132		1	2966	1	1	1	1	495.167	8.65	-2903.13	132		1	3295	7735	3121	3538	8.65	0	132		6927	3247	1	1
8.65083	126	42	96	1	465	1	128	183	1	1	1	91.9		1	347	1380	1	260	273	1	323.286	8.65083	0	126		267	1	1	249	277	127	153.667	8.65083	0	126		1	176	480	366	255.75	8.65083	0	126		1	1	317	1
8.65167	208	1	571	1	240	1	1	54	1	1	1	87.2		1	1	1210	784	1	1	727	389.286	8.65167	0	208		1	912	1	1	186	1	183.667	8.65167	0	208		304	207	1	1	128.25	8.65167	0	208		1	1	219	1274
8.6525	284	1	1	1	1	1	1	1	1	1	1	1		1	1	87	1	1	1	1	13.2857	8.6525	0	284		1	1	1	1	1	1	1	8.6525	#DIV/0!	284		1	1	1	1	1	8.6525	#DIV/0!	284		1	1	22	1
8.65333	103	5445	1	4670	1	1	5479	6391	1	1	1	2199.1		3535	5351	95042	1	4328	9429	1	16812.4	8.65333	0	103		1	3069	1	1	1	1	512.333	8.65333	0	103		1	1	6983	3003	2497	8.65333	0	103		5161	3085	1	1
8.655	191	1	1	1	1	1	1	528	1	1	1	53.7		1	1	7135	1	391	1	1066	1228	8.655	0	191		1	653	1	1	366	1	170.5	8.655	0	191		1	301	454	114	217.5	8.655	0	191		27	444	273	1
8.65583	243	1	1	1	1	1	1	1	1	1	5	1.4		1	1	215	1	1	1	1	31.5714	8.65583	0	243		1	1	1	1	1	1	1	8.65583	0	243		1	1	1	1	1	8.65583	0	243		1	1	1	1
8.65667	206	1	1	284	155	193	341	359	412	221	307	227.4		230	332	4154	1	239	423	1	768.571	8.65667	0	206		1	116	13	1	160	1	48.6667	8.65667	-178.733	206		1	121	386	161	167.25	8.65667	0	206		340	146	121	1
8.6575	91	4608	1	4199	1	16	1	2921	9435	5486	1	2666.9		3856	1322	27203	1	2336	4018	1233	5709.86	8.6575	0	91		1	1262	1	1	1576	1	473.667	8.6575	0	91		1	1349	3712	1486	1637	8.6575	0	91		4124	1378	1462	890
8.65833	60	10321	2472	8742	2882	11147	9303	4723	25838	11956	14152	10153.6		7730	1	24731	6864	1	22023	1	8764.43	8.65833	0	60		7041	1	1	7210	1	5922	3362.67	8.65833	-6790.93	60		1	1789	1	1	448	8.65833	-9705.6	60		4637	1	1	2689
8.65917	162	461	1	573	1	734	1	318	1688	787	44	460.8		484	240	7007	1	163	3113	1	1572.71	8.65917	0	162		467	228	1	1	1	1	116.5	8.65917	0	162		1	225	337	174	184.25	8.65917	0	162		1	1	1	138
8.66	75	34504	1	31981	10718	34450	1	32759	73292	36818	1	25452.5		26236	27530	237613	1	23986	43443	1	51258.6	8.66	0	75		18561	1	1	1	1	1	3094.33	8.66	-22358.2	75		1	1	1	16160	4040.75	8.66	0	75		27709	16645	1	5865
8.66083	89	78518	1	60085	1	82900	71028	16073	201627	94229	101934	70639.6		52425	8600	44590	45642	1	149885	1	43020.6	8.66083	0	89		53952	1	1	52635	1	42200	24798.3	8.66083	0	89		1	4925	1	1	1232	8.66083	-69407.6	89		18780	1	1	27239
8.66167	61	12140	1	4627	1	1	1	7261	29349	13447	1	6682.9		8793	5864	47319	1	5690	9656	1	11046.3	8.66167	0	61		1	1	1	1	1	1	1	8.66167	0	61		1	1	6627	3913	2635.5	8.66167	0	61		6609	1961	1	1650
8.6625	161	1156	353	1020	1	1	88	1	4269	1868	64	882.1		947	12	7028	1	62	1	723	1253.43	8.6625	0	161		1	1	1	1	1	885	148.333	8.6625	0	161		1	222	1	94	79.5	8.6625	0	161		1	1	1	444
8.66333	380	1	1	1	1	1	1	1	1	1	1	1		1	1	1	1	13	1	1	2.71429	8.66333	0	380		1	1	1	1	1	1	1	8.66333	#DIV/0!	380		1	1	1	1	1	8.66333	#DIV/0!	380		1	1	1	1
8.66417	99	3696	1053	2986	1	4100	1	7549	9630	4509	1	3352.6		2373	1	18738	1	747	11436	21564	7837.14	8.66417	0	99		2447	1	1	1	1	1642	682.167	8.66417	0	99		1	900	1	709	402.75	8.66417	0	99		1	5554	1	1172
8.665	115	20816	1	16820	1	1	1	1	56263	26213	1	12011.8		14150	1	119648	1	1	1	1	19114.7	8.665	0	115		1	1	1	1	1	1	1	8.665	0	115		1	1	1	1	1	8.665	0	115		1	1	1	6960
8.66583	84	3135	1	3263	1	1	1	1776	8632	4174	1	2098.5		2484	1	19220	1527	1	1	1	3319.29	8.66583	0	84		1	988	1	1	1	1	165.5	8.66583	0	84		1	1	2644	1398	1011	8.66583	0	84		1879	1	1	578
8.6675	563	1	1	1	1	1	1	12	1	1	1	2.1		1	1	1	1	1	1	27	4.71429	8.6675	0	563		1	1	1	1	1	1	1	8.6675	0	563		1	1	1	11	3.5	8.6675	0	563		1	1	1	1
8.66833	283	1	35	1	33	50	31	55	84	57	36	38.3		39	85	74	59	1	67	1	46.5714	8.66833	0	283		1	1	76	1	1	1	13.5	8.66833	0	283		1	1	53	1	14	8.66833	0	283		1	45	1	92
8.66917	492	1	1	1	1	1	1	1	1	1	1	1		1	1	1	1	1	1	1	1	8.66917	#DIV/0!	492		1	1	22	1	1	1	4.5	8.66917	0	492		1	1	1	1	1	8.66917	#DIV/0!	492		1	1	1	1
8.67	587	1	1	1	92	20	1	1	1	1	1	12		1	1	1	1	29	1	1	5	8.67	0	587		1	1	1	1	1	1	1	8.67	0	587		1	1	1	1	1	8.67	0	587		1	1	1	1
8.67083	143	1	1	1	1	1	1	1	1	1	1	1		1	1	1	1	1	1	1	1	8.67083	#DIV/0!	143		1	1	1	1	1	1	1	8.67083	#DIV/0!	143		1750	1	1	1	438.25	8.67083	0	143		1	1	1	1
8.67167	211	1	480	479	325	225	299	1	431	285	1	252.7		198	476	1	636	1	521	806	377	8.67167	0	211		322	1	309	395	1	313	223.5	8.67167	0	211		322	1	1	1	81.25	8.67167	0	211		147	1	39	916
8.6725	207	1484	3079	1	1	1	1	2613	1	1	1	718.3		1	1	3166	3943	2874	1	3722	1958.29	8.6725	0	207		1	5344	1	1	1064	1	1068.67	8.6725	0	207		1660	1201	2585	1529	1743.75	8.6725	0	207		1	1838	1308	6584
8.67333	97	1	1	1	254	1	1	1	1	1	1	26.3		1	1	1	1	1	1	1	1	8.67333	0	97		1	1	1	1	1	1	1	8.67333	0	97		1	1	1	1	1	8.67333	0	97		1	1	1	1
8.67417	161	1	1	1	1	1613	1	1	1	1	2938	455.9		1	1	1	1	1	4911	1	702.429	8.67417	0	161		1115	1	1	1052	1	1	361.833	8.67417	0	161		1	1	1	1	1	8.67417	0	161		1	1	1	1
8.675	79	1	1	1	1	1	1	55321	1	1	1	5533		1	1	1	1	1	1	36366	5196	8.675	0	79		1	1	1	1	1	1	1	8.675	0	79		35126	1	1	1	8782.25	8.675	0	79		1	1	19235	1
8.67583	471	1	1	1	1	10	1	1	1	1	1	1.9		1	1	1	1	1	1	1	1	8.67583	0	471		1	1	1	1	1	9	2.33333	8.67583	0	471		1	1	1	1	1	8.67583	0	471		1	9	1	1
8.67667	61	1	1	1	1	13120	1	1	1	1	1	1312.9		1	1	1	1	1	31653	1	4522.71	8.67667	0	61		6433	1	1	1	1	7187	2270.67	8.67667	0	61		1	1	1	1	1	8.67667	0	61		1	1	1	1
8.6775	529	1	1	27	1	1	15	1	1	1	1	5		1	1	1	1	1	1	1	1	8.6775	0	529		1	1	1	1	1	1	1	8.6775	0	529		1	1	1	1	1	8.6775	0	529		1	1	1	1
8.67917	93	1	1	1	1	1	1	1	1	1	1	1		1	1	1	1	1	1	1	1	8.67917	#DIV/0!	93		1	1	1	1	1	1	1	8.67917	#DIV/0!	93		1	1	1	1	1	8.67917	#DIV/0!	93		405	1	1	1
8.68083	530	1	9	1	90	1	1	11	1	1	1	11.7		1	1	1	1	1	1	1	1	8.68083	0	530		1	1	1	1	1	1	1	8.68083	0	530		1	1	1	1	1	8.68083	0	530		1	1	1	1
8.68167	541	1	1	1	1	1	1	12	1	1	1	2.1		1	1	1	17	1	1	1	3.28571	8.68167	0	541		1	1	1	1	1	9	2.33333	8.68167	0	541		1	1	1	1	1	8.68167	0	541		1	1	1	1
8.6825	120	1	1	1	1	1	1	1	1	1	1	1		1	1	1	1	1	12636	1	1806	8.6825	0	120		1	1	1	1	1	1	1	8.6825	#DIV/0!	120		9309	1	1	1	2328	8.6825	0	120		1	1	1	112
8.68333	116	1	1	2836	1	1	1	1	7764	1	1	1060.8		1	1	32877	1	1538	15289	1	7101.14	8.68333	0	116		1	1	1	1	1	1	1	8.68333	0	116		1	1	1	1	1	8.68333	0	116		1249	1	1	1
8.68417	253	1	98	94	1	47	69	86	9	1	1	40.7		68	31	193	1	82	72	1	64	8.68417	0	253		1	9	1	1	39	67	19.6667	8.68417	0	253		9	7	13	12	10.25	8.68417	0	253		1	56	53	179
8.685	88	1	1	2569	1	3357	1	1639	6968	3362	1	1790		1946	1332	21481	1	1042	11038	1	5263	8.685	0	88		2072	1035	1	1	649	1	626.5	8.685	0	88		1	1015	1854	1	717.75	8.685	0	88		1325	863	1	675
8.68583	108	1	1091	1	1	1	1	1	1	1	1	110		1	1	4250	2852	1	1	1	1015.29	8.68583	0	108		90	1	1	1	1	1	15.8333	8.68583	0	108		1	1	1	1	1	8.68583	0	108		269	1	1	1
8.68667	213	1	51	1	1	1	1	8	46	1	49	16		2	1	379	10	1	35	12	62.8571	8.68667	0	213		1	1	14	1	1	1	3.16667	8.68667	0	213		156	29	1	1	46.75	8.68667	0	213		40	1	1	1
8.6875	187	1	39	1	1	1	1	148	1	1	1	19.5		1	136	747	1	378	196	1	208.571	8.6875	189.071	187		32	188	1	1	602	1	137.5	8.6875	0	187		235	218	177	285	228.75	8.6875	209.25	187		262	198	623	8
8.68833	245	1	88	1	1	1	1	1	1	1	1	9.7		1	1	42	1	1	1128	3115	612.714	8.68833	0	245		1	1	67	1	461	1	88.6667	8.68833	0	245		607	1	908	743	564.75	8.68833	555.05	245		1	1	628	1
8.68917	244	1	1	1	1	1	1	1	1	1	1	1		1	3802	1	1	1	6818	17440	4009.14	8.68917	0	244		1	1	1	1	2828	1	472.167	8.68917	0	244		3477	1	5499	4798	3443.75	8.68917	3442.75	244		1	2844	3865	1
8.69083	69	1	1	1	1	1	1	17197	1	1	16391	3359.6		1	1	1	1	33464	25349	47936	15250.4	8.69083	0	69		1	25655	1	1	13298	1	6492.83	8.69083	0	69		12321	1	27276	23431	15757.2	8.69083	12397.6	69		1	13894	16615	1
8.69167	186	109	1	1	1	1	895	734	820	1	653	321.6		1843	663	1167	56	1	919	1	664.286	8.69167	0	186		1	1	1	1	16	1	3.5	8.69167	0	186		94	1	1	1	24.25	8.69167	0	186		1649	1065	1	167
8.6925	70	1	1	1	1	1	1	1	1	1	1	1		1	1	88226	1	1	40258	99778	32609.4	8.6925	32608.4	70		1	27225	1	1	21972	1	8200.17	8.6925	0	70		32581	1	38023	1	17651.5	8.6925	17650.5	70		1	20043	24197	1
8.69333	74	1	1	1	1	1	1	99396	1	1	1	9940.5		25008	1	1	1	1	158070	367194	78610.9	8.69333	0	74		25842	99859	1	1	82974	1	34779.7	8.69333	0	74		1	1	155417	1	38855	8.69333	0	74		1	80153	1	1
8.69417	77	1	1	1	1	1	1	1	1	1	1	1		1	1	1075871	1	1	460565	1177451	387699	8.69417	387698	77		1	312804	1	1	231414	1	90703.7	8.69417	0	77		401844	1	369676	313540	271265	8.69417	271264	77		40749	207598	262993	1
8.695	73	1	1	1	1	1	1	151956	1	1	1	15196.5		1	1	3532198	1	163371	1497037	3839150	1.29025e+06	8.695	1.27505e+06	73		1	960405	1	1	814222	1	295772	8.695	0	73		1222142	1	1339659	1	640451	8.695	625254	73		183962	149700	850931	1
8.69583	66	1	1	6385	3325	2051	1	3455	1	1	1	1522.2		3976	128	55411	1	3690	1	64357	18223.4	8.69583	0	66		1	2195	758	1	16303	1	3209.83	8.69583	0	66		19708	5363	11270	1380	9430.25	8.69583	7908.05	66		5344	1	14916	1
8.69667	242	1	1	1	1	1	1	59	1	1	2	6.9		1	1	231	244	70	97	320	137.714	8.69667	130.814	242		1	1	1	1	1	83	14.6667	8.69667	0	242		85	33	77	59	63.5	8.69667	56.6	242		1	1	30	1
8.6975	254	1	28	1	19	1	1	1	1	1	1	5.5		1	1	70	1	1	1	101	25.1429	8.6975	0	254		1	1	1	1	1	1	1	8.6975	0	254		1	19	1	1	5.5	8.6975	0	254		1	1	1	1
8.69833	301	1	8	1	85	36	42	1	1	8	1	18.4		1	1	160	77	1	92	181	73.2857	8.69833	0	301		18	1	1	1	1	7	4.83333	8.69833	0	301		57	1	1	1	15	8.69833	0	301		1	40	1	70
8.69917	248	4757	8540	9332	14345	1	1	1	1	1	1	3698		1	1	1	15674	1	1	1002	2383	8.69917	0	248		1	224	1	16892	169	1	2881.33	8.69917	0	248		335	1	1	1	84.5	8.69917	0	248		1	1	186	14999
8.7	83	1	1	2996	1	1	1	5304	1	1	1	830.8		1	1	1	3808	1	7780	6331	2560.43	8.7	0	83		1	4129	1896	1	1	1	1004.83	8.7	0	83		1	1	9083	1	2271.5	8.7	0	83		1	3828	1	1
8.70083	90	1	1	1	1	1	1	12861	1	1	1	1287		1	6744	1	1	1	1	14117	2980.86	8.70083	0	90		1	8288	1	1	1	1	1382.17	8.70083	0	90		1	1	18926	6822	6437.5	8.70083	0	90		1	8775	1	1
8.70167	89	1	1	1	38596	1	1	103570	1	35308	1	17748.1		1	37061	1	49537	43220	1	47900	25388.7	8.70167	0	89		1	56160	27733	48755	52648	1	30883	8.70167	0	89		58592	62677	148763	42885	78229.2	8.70167	60481.2	89		68693	68886	55601	1
8.7025	65	1	1	2332	3836	1	1724	3271	4339	2402	1	1790.8		1	1	1024	4708	1	1	3160	1270.86	8.7025	0	65		3810	2274	1	4135	1982	1124	2221	8.7025	0	65		2450	3207	5023	1	2670.25	8.7025	0	65		1	2007	2294	1
8.70333	144	1	1	1	9164	1	1	1	1	1	1	917.3		1	1	508	13814	1	5160	14007	4784.57	8.70333	0	144		1	3249	1	1	2950	1	1033.83	8.70333	0	144		4728	3146	4674	3640	4047	8.70333	0	144		1	2751	3029	1
8.70417	143	1	1	1	8027	1	1	3404	4045	1	2372	1785.4		1	4143	1303	8269	4536	3137	7375	4109.14	8.70417	0	143		6869	3186	5639	8005	1859	3857	4902.5	8.70417	3117.1	143		1532	2274	4621	3273	2925	8.70417	0	143		1	2104	2417	1664
8.705	94	638	147	523	810	433	351	1	688	313	1	390.5		160	652	1	569	1	517	939	405.571	8.705	0	94		860	1	1	783	269	335	374.833	8.705	0	94		440	1	723	428	398	8.705	0	94		1	266	351	434
8.70583	475	1	1	1	1	1	1	1	1	1	15	2.4		1	1	1	1	1	1	1	1	8.70583	0	475		1	1	34	1	1	1	6.5	8.70583	0	475		1	1	1	1	1	8.70583	0	475		1	1	1	1
8.70667	187	1	1	1	356	1	240	1	243	1	1	84.6		344	1	1	686	1	1	942	282.286	8.70667	0	187		1	142	361	505	101	1	185.167	8.70667	0	187		251	116	128	138	158.25	8.70667	0	187		1	1	1	1
8.7075	359	1	1	1	1	1	1	1	22	1	1	3.1		14	1	1	1	1	1	1	2.85714	8.7075	0	359		1	16	1	1	1	1	3.5	8.7075	0	359		1	2	1	1	1.25	8.7075	0	359		1	1	1	1
8.70833	329	1	1	20	1	15	1	1	1	1	1	4.3		1	1	1	1	1	1	1	1	8.70833	0	329		1	1	1	1	1	4	1.5	8.70833	0	329		1	12	1	1	3.75	8.70833	0	329		1	1	1	1
8.70917	129	1	8313	1	1	1	1	1	1	1	1	832.2		1	1	1227	10486	1	1	11224	3277.29	8.70917	0	129		1	3334	1	9552	2839	1	2621.33	8.70917	0	129		1	3063	5624	1	2172.25	8.70917	0	129		1	2790	3090	1005
8.71	97	1	1	1	929	1	1	1	1	1	1	93.8		1	1	1	1224	1	1445	1284	565.286	8.71	0	97		1	1159	688	1125	1	1	495.833	8.71	0	97		1	1	1573	1	394	8.71	0	97		590	766	1	74
8.71083	146	1	1	1	1	1535	1	2533	1	1	1	407.6		1	1	1	12721	1	5169	12973	4409.57	8.71083	0	146		946	3674	1	1	2976	1	1266.5	8.71083	0	146		4341	3299	5483	3408	4132.75	8.71083	3725.15	146		1	2710	2939	1
8.71167	118	1	17643	1	15120	1	1	1	1	1	1	3277.1		1	15266	3459	23923	1	15577	27484	12244.4	8.71167	0	118		1	7419	14798	22759	6213	1	8531.83	8.71167	0	118		9414	1	12206	1	5405.5	8.71167	0	118		1	7537	6812	1
8.7125	71	1	1	1	1	1	1	13980	1	1	1	1398.9		3422	1	3034	1	1	18228	42333	9574.29	8.7125	0	71		1	11710	1	1	10244	1	3659.67	8.7125	0	71		1	1	19589	1	4898	8.7125	0	71		1	9688	10877	1
8.71333	117	1	80420	1	1	1	1	1	1	1	1	8042.9		1	87463	32001	109984	1	81145	124727	62188.9	8.71333	54146	117		1	40297	67666	103828	38431	1	41704	8.71333	0	117		44326	34122	79591	51813	52463	8.71333	44420.1	117		1	44227	42832	1
8.71417	507	1	1	1	1	1	1	1	1	1	1	1		1	1	1	1	1	1	1	1	8.71417	#DIV/0!	507		1	1	1	1	1	1	1	8.71417	#DIV/0!	507		1	1	1	1	1	8.71417	#DIV/0!	507		1	1	1	1
8.715	587	1	1	1	63	1	1	1	1	1	1	7.2		1	1	1	1	1	1	1	1	8.715	0	587		1	1	1	1	1	1	1	8.715	0	587		1	1	1	1	1	8.715	0	587		1	1	16	1
8.71667	69	1	1	1	1	1	1	1	1	1	1	1		1	1	1	1	1	1	1	1	8.71667	#DIV/0!	69		1	1	1	1	1	1	1	8.71667	#DIV/0!	69		1	1	1	1	1	8.71667	#DIV/0!	69		1	1	1	1
8.7175	454	1	1	31	1	1	1	21	1	1	24	8.3		1	1	1	1	1	1	1	1	8.7175	0	454		29	1	1	1	1	18	8.5	8.7175	0	454		5	6	1	1	3.25	8.7175	0	454		1	1	1	1
8.71833	299	1	1	1	1	1	1	1	1	1	1	1		1	1	1	1	122	1	1	18.2857	8.71833	0	299		1	140	1	1	99	1	40.5	8.71833	0	299		1	1	1	1	1	8.71833	#DIV/0!	299		1	1	127	1
8.71917	69	32486	22679	28084	59556	34374	20795	17104	31718	27164	1	27396.1		17267	25265	1	57916	40964	20505	1	23131.3	8.71917	0	69		49358	1	40184	58237	13564	26907	31375.2	8.71917	0	69		13273	19438	1	26057	14692.2	8.71917	0	69		68358	11908	17140	39551
8.72	186	1	1334	1080	426	782	1	74	118	1494	164	547.4		102	1	1	1107	36	1	1216	352	8.72	0	186		1114	42	788	1286	1	1397	771.333	8.72	0	186		115	1	50	1	41.75	8.72	0	186		86	1	5	1
8.72167	340	1	1	26	1	1	1	1	1	1	1	3.5		1	1	1	1	1	1	1	1	8.72167	0	340		1	1	1	1	1	1	1	8.72167	0	340		1	3	1	1	1.5	8.72167	0	340		1	1	1	1
8.7225	104	1	1	1	1	1	1	1	1	1	1	1		1	1	1	45600	1	19487	50961	16578.9	8.7225	16577.9	104		1	11983	1	1	9964	1	3658.5	8.7225	0	104		17342	11549	16409	12123	14355.8	8.7225	14354.8	104		1	9061	10533	1
8.72333	227	1	1	1	539	1	1	1	642	1	1	118.9		1	1	1	883	1	1	1	127	8.72333	0	227		1	1	1	1	1	1	1	8.72333	0	227		1	212	1	1	53.75	8.72333	0	227		1	1	1	1
8.72417	207	1	1	2870	3709	3320	1	1	4289	3055	1	1724.8		1981	2766	1	2662	1	1	3737	1592.71	8.72417	0	207		3522	11180	2720	4675	1	3046	4190.67	8.72417	0	207		1	1	1	1	1	8.72417	0	207		1	4120	1	1
8.725	175	1	1	1	1	1	1	1	1	1	1	1		1	1	113903	102558	1	41768	129376	55372.6	8.725	55371.6	175		1	23902	1	1	20955	1	7476.83	8.725	0	175		43641	22964	28472	23750	29706.8	8.725	29705.8	175		1	1	21303	1
8.72583	174	1	1	1	1	1	1	1	1	1	1	1		1	1	684989	614155	1	248411	776668	332032	8.72583	332031	174		1	141198	1	1	123893	1	44182.5	8.72583	0	174		258746	135698	167684	139863	175498	8.72583	175497	174		1	110634	125529	1
8.72667	79	102867	1	1	43527	38774	1	1	55707	21596	33426	29590.1		1	1	1	60201	1	69031	1	18462.4	8.72667	0	79		41513	11844	34241	44265	28301	20851	30169.2	8.72667	0	79		29402	20837	36358	13244	24960.2	8.72667	0	79		1	1	1	26266
8.7275	120	16133	15141	17475	29541	19486	12532	9456	16039	15587	10501	16189.1		10185	13753	1	30544	17094	13790	30953	16617.1	8.7275	0	120		30546	12098	20960	32387	5999	16603	19765.5	8.7275	0	120		1	8878	13009	8155	7510.75	8.7275	-8678.35	120		1	5554	7603	1
8.72833	378	1	1	1	48	1	1	1	7	1	1	6.3		1	1	1	1	1	1	1	1	8.72833	0	378		1	1	1	1	1	1	1	8.72833	0	378		1	1	1	1	1	8.72833	0	378		1	1	30	1
8.72917	65	2574	1491	1	1	2892	1	2368	1	1	1	933.1		1483	2274	1	1	3966	1	948	1239.14	8.72917	0	65		1	1	2935	1	1	2374	885.5	8.72917	0	65		1	2767	1	2722	1372.75	8.72917	0	65		5497	1	1	2122
8.73	90	7404	8522	7387	9389	10414	6317	6528	10028	9415	7844	8324.8		6026	6724	312	13050	8421	8103	1	6091	8.73	0	90		13066	3811	8620	12875	7399	9252	9170.5	8.73	0	90		9289	8825	1	6000	6028.75	8.73	0	90		11803	1	7917	17174
8.73083	170	8771	9009	9565	15315	11035	6634	5871	8119	8672	6233	8922.4		5721	4707	1	16727	8583	7373	1	6159	8.73083	0	170		17315	6965	11604	17728	3242	9333	11031.2	8.73083	0	170		1	4560	6490	4543	3898.5	8.73083	-5023.9	170		16806	3248	4514	18874
8.73167	157	1	1	1	1456	1	1	1	1	1	1	146.5		1	1	1	2062	1564	1	2560	884.286	8.73167	0	157		12	1235	1394	2178	1102	1	987	8.73167	840.5	157		1128	864	2429	1228	1412.25	8.73167	1265.75	157		1	1266	1194	1
8.7325	67	5289	4375	4998	7555	6872	4211	5042	7701	5685	4072	5580		3547	2295	2020	9783	7117	4226	2258	4463.71	8.7325	0	67		7812	2674	6245	8712	2592	5257	5548.67	8.7325	0	67		1	1	5250	4812	2516	8.7325	-3064	67		9935	2218	1	6508
8.73333	78	50680	52387	47260	59651	63852	39831	1	62760	57526	44787	47873.5		37406	38580	5444	86381	55419	49201	85421	51121.7	8.73333	0	78		79171	25175	54717	82232	19212	54539	52507.7	8.73333	0	78		1	1	31585	38591	17544.5	8.73333	-30329	78		66616	1	17411	94088
8.73417	77	666077	732916	644646	792472	862558	537327	1	756639	773216	586977	635283		512824	578097	1	1189291	657279	619980	1	508210	8.73417	0	77		1084849	1	752685	1126875	306902	743623	669156	8.73417	0	77		418532	286081	1	469422	293509	8.73417	-341774	77		844779	1	1	1319906
8.735	147	971523	1108769	923975	1110833	1243780	822064	832144	1017286	1132263	1004162	1.01668e+06		746655	835987	24223	1621408	876323	912028	47949	723510	8.735	0	147		1615579	1	1031177	1562601	443439	1123124	962654	8.735	0	147		651949	490539	1	629984	443118	8.735	-573562	147		1212622	486321	471557	2451790
8.73583	73	2220801	2495640	2176379	2476270	2869989	1804892	1	2617600	2613071	2027495	2.13021e+06		1735953	1924762	66496	3818523	2068290	2051938	107224	1.68188e+06	8.73583	0	73		3537158	1	2385979	3577986	1	2537280	2.0064e+06	8.73583	0	73		1312018	950712	1	1518647	945344	8.73583	-1.18487e+06	73		2760060	1	1	4697089
8.73667	75	206866	166416	1	184842	1	1	1	239093	1	141941	93916.3		1	1	23165	284286	1	1	258613	80866.9	8.73667	0	75		1	79294	178541	258417	66521	1	97129.2	8.73667	0	75		94769	82177	128450	1	76349.2	8.73667	0	75		1	1	72706	1
8.7375	129	8287	1411	8425	7334	8537	6670	6127	9843	9078	7127	7283.9		6448	5733	1	1	5673	7000	2032	3841.14	8.7375	-3442.76	129		10470	1950	6732	1	2725	8652	5088.33	8.7375	0	129		3997	1	1	4365	2091	8.7375	-5192.9	129		8576	4353	1	15987
8.73833	97	1220	730	870	1	870	1	1	1842	1222	1	675.8		575	1008	749	799	1559	1	1	670.286	8.73833	0	97		1095	1	1	1102	1	1157	559.5	8.73833	0	97		1	1	1	1232	308.75	8.73833	0	97		1254	1	1	1618
8.73917	72	721237	789636	740495	437414	1	1	1	623105	522475	1	383437		553948	1	1	684634	1	94181	727869	294376	8.73917	0	72		463112	66254	440328	517959	52779	547349	347964	8.73917	0	72		1	1	86037	1	21510	8.73917	0	72		15801	1	54531	680226
8.74	527	1	1	1	1	1	1	1	1	1	1	1		1	1	5	1	1	1	1	1.57143	8.74	0	527		1	1	1	1	1	1	1	8.74	#DIV/0!	527		15	1	1	1	4.5	8.74	0	527		1	3	1	1
8.74083	208	837	937	979	897	984	1168	1	1561	1084	1608	1005.6		599	1	1	1	2093	1540	1	605.143	8.74083	0	208		1335	1	712	1068	1	955	678.667	8.74083	0	208		1	1	3177	1386	1141.25	8.74083	0	208		1	1	1	2567
8.74167	327	1	25	1	1	1	1	1	1	1	22	5.5		1	1	1	73	1	1	1	11.2857	8.74167	0	327		51	1	1	1	1	1	9.33333	8.74167	0	327		1	1	1	20	5.75	8.74167	0	327		1	1	1	44
8.7425	117	95347	1	85598	73284	87444	78550	69523	114685	92735	91765	78893.2		60376	1	1	1	69002	1	32865	23178.1	8.7425	-55715.1	117		115602	1	1	1	1	83062	33111.3	8.7425	-45781.9	117		47746	34563	1	1	20577.8	8.7425	-58315.4	117		126981	32898	1	188580
8.74333	120	1	1	1	1	1	1	1	1	1	1	1		1	1	1	1	22296	1	1	3186	8.74333	0	120		1	10851	1	1	6615	1	2911.67	8.74333	0	120		8816	1	1	10095	4728.25	8.74333	4727.25	120		32507	1	8486	31508
8.74417	366	1	1	1	1	1	1	1	1	1	25	3.4		1	1	1	28	1	20	1	7.57143	8.74417	0	366		1	17	27	1	1	1	8	8.74417	0	366		1	1	1	1	1	8.74417	0	366		1	1	1	1
8.745	253	1	150	141	26	132	107	1	114	130	123	92.5		93	112	1	206	66	88	1	81	8.745	0	253		170	1	109	165	1	136	97	8.745	0	253		1	47	1	94	35.75	8.745	0	253		1	1	1	345
8.74583	295	1	106	1	1	88	392	1	1	1	1	59.3		1	1	128	129	1	1	150	58.7143	8.74583	0	295		157	340	17	165	1	1	113.5	8.74583	0	295		1	1	1	1	1	8.74583	0	295		1	1	1	1
8.74667	443	1	1	1	1	1	1	1	1	1	18	2.7		1	1	1	1	41	1	1	6.71429	8.74667	0	443		1	1	1	1	1	1	1	8.74667	0	443		1	1	1	1	1	8.74667	0	443		1	1	1	46
8.7475	94	520	1	473	1	1	1	572	1	1	429	200		1	1	281	1	948	1	1	176.286	8.7475	0	94		1	1	1	1	1	1	1	8.7475	0	94		1	1	1	1	1	8.7475	0	94		824	1	1	1
8.74833	344	1	12	1	1	1	1	14	1	1	6	3.9		1	1	1	43	10	21	1	11.1429	8.74833	0	344		1	1	1	1	1	1	1	8.74833	0	344		12	7	16	1	9	8.74833	0	344		1	1	1	1
8.74917	88	1	1	13940	1	18120	1	12040	1	17149	1	6125.5		11280	1	1	1	13405	1	1865	3793.43	8.74917	0	88		22640	1	1	1	1	1	3774.17	8.74917	0	88		8755	7558	1	9389	6425.75	8.74917	0	88		18573	7022	1	29391
8.75	91	1	1	1	1	1	1	1	1	1	1	1		1	1	1	1	1	1	1	1	8.75	#DIV/0!	91		1	1	1	1	1	1	1	8.75	#DIV/0!	91		11366	1	1	1	2842.25	8.75	0	91		1	1	1	1
8.75083	116	1	1	1	1	26677	15884	18125	1	1	22125	8281.7		15628	1	1	1	20990	19450	2239	8330	8.75083	0	116		1	1	1	1	8918	1	1487.17	8.75083	0	116		13918	11437	1	12756	9528	8.75083	0	116		29269	10816	10357	54225
8.75167	103	1	1	1	1	79188	51968	56171	1	1	64883	25221.6		51747	52209	1	1	52444	62677	3202	31754.4	8.75167	0	103		102850	1	1	1	1	1	17142.5	8.75167	0	103		38954	1	1	36927	18970.8	8.75167	0	103		65144	34071	1	151032
8.7525	99	1	1	1	1	1	1	10318	1	1	1	1032.7		1	1	1	1	10668	12195	1	3266.86	8.7525	0	99		1	4936	1	1	6061	1	1833.5	8.7525	0	99		9261	6590	1	1	3963.25	8.7525	0	99		1	6014	6497	29983
8.75333	108	1	1	2615	1	1	1	1	1	1	1	262.4		1	1	1	1094	2612	1	1	530.143	8.75333	0	108		1	2461	1	1	2048	1	752.167	8.75333	0	108		2996	1701	2745	1	1860.75	8.75333	1598.35	108		1	1	2175	7261
8.75417	242	1	193	142	181	196	126	116	169	196	174	149.4		114	110	1	1	122	158	1	72.4286	8.75417	-76.9714	242		265	46	159	219	66	267	170.333	8.75417	0	242		101	1	106	101	77.25	8.75417	0	242		124	82	1	453
8.755	256	1	45	1	1	19	5	1	9	7	22	11.1		23	1	1	1	1	1	1	4.14286	8.755	0	256		63	1	1	1	6	8	13.3333	8.755	0	256		1	1	1	1	1	8.755	0	256		1	1	1	112
8.75583	79	1	1	1	1	1	1	70222	49906	22218	32898	17525		20204	100827	19249	1	43371	1	3336	26712.7	8.75583	0	79		1	1	1	1	28659	21202	8310.83	8.75583	0	79		22812	22469	1	17417	15674.8	8.75583	0	79		51336	1	20643	23118
8.75667	418	1	1	1	1	1	1	1	1	12	1	2.1		1	1	1	43	1	1	1	7	8.75667	0	418		1	1	1	1	1	23	4.66667	8.75667	0	418		9	1	1	1	3	8.75667	0	418		1	1	1	1
8.7575	248	1	1	17	1	1	1	1	1	1	1	2.6		1	1	4	1	1	1	1	1.42857	8.7575	0	248		1	1	1	1	1	1	1	8.7575	0	248		1634	2987	1	1	1155.75	8.7575	1153.15	248		1	1	3577	1
8.75917	92	1	1	1	1	1	1	1	1	1	2595	260.4		1	1	1	584	1	1	514	157.571	8.75917	0	92		1	2600	1	1	2032	1	772.667	8.75917	0	92		1	2042	1	1	511.25	8.75917	0	92		1	1	2276	1
8.76	517	1	1	1	67	1	1	1	1	1	1	7.6		1	1	1	1	1	1	1	1	8.76	0	517		1	1	1	1	1	1	1	8.76	0	517		1	1	1	1	1	8.76	0	517		1	1	1	1
8.76083	363	1	1	1	1	16	1	1	1	1	1	2.5		1	1	1	1	1	1	1	1	8.76083	0	363		1	1	1	1	1	1	1	8.76083	0	363		1	1	1	1	1	8.76083	0	363		49	1	1	1
8.76167	257	1	1	1	1	1	1	40	44	53	34	17.7		1	1	1	1	1	44	1	7.14286	8.76167	0	257		28	35	1	1	1	143	34.8333	8.76167	0	257		36	1	1	54	23	8.76167	0	257		1	1	1	118
8.7625	430	1	1	46	57	1	1	1	1	1	16	12.6		1	1	1	1	1	1	1	1	8.7625	0	430		1	1	1	1	1	7	2	8.7625	0	430		2	1	13	1	4.25	8.7625	0	430		1	1	1	1
8.76333	376	1	1	48	1	25	1	1	1	1	1	8.1		1	1	1	1	1	1	1	1	8.76333	0	376		1	1	1	1	1	1	1	8.76333	0	376		1	1	1	1	1	8.76333	0	376		1	1	1	1
8.76417	410	1	15	1	1	1	1	1	1	1	29	5.2		1	1	1	1	1	1	1	1	8.76417	0	410		1	1	1	1	11	1	2.66667	8.76417	0	410		17	1	1	26	11.25	8.76417	0	410		1	1	1	1
8.765	557	1	1	1	1	1	1	1	1	1	1	1		1	1	1	1	1	1	1	1	8.765	#DIV/0!	557		1	1	1	1	1	1	1	8.765	#DIV/0!	557		1	1	1	1	1	8.765	#DIV/0!	557		1	1	1	1
8.76583	95	1	1647	1867	1	2226	1	1890	1	2203	1942	1177.9		1265	1	803	1	2547	1	894	787.429	8.76583	0	95		2829	1	1	2944	1	2000	1296	8.76583	0	95		1	1	2280	1736	1004.5	8.76583	0	95		3024	1091	1773	2744
8.76667	368	1	1	1	1	1	1	1	1	1	1	1		4	1	1	1	1	17	33	8.28571	8.76667	0	368		1	21	1	1	1	1	4.33333	8.76667	0	368		9	1	1	1	3	8.76667	0	368		1	1	1	1
8.76833	367	1	1	32	24	23	1	1	1	8	4	9.6		1	1	1	1	1	5	1	1.57143	8.76833	0	367		1	1	1	1	1	1	1	8.76833	0	367		1	1	4	1	1.75	8.76833	0	367		1	1	1	1
8.76917	85	1	1	1	1	1	1	14273	1	1	1	1428.2		1	1	1	1	1	16719	1	2389.29	8.76917	0	85		1	13284	1	1	9289	1	3762.83	8.76917	0	85		11581	9432	14229	1	8810.75	8.76917	7382.55	85		1	8839	1	1
8.77083	89	1	1	26649	1	38632	21719	23555	1	1	1	11056.1		21761	1	1	1	1	1	1	3109.57	8.77083	0	89		45507	1	32661	1	1	31393	18260.7	8.77083	0	89		1	1	1	1	1	8.77083	0	89		1	14638	1	54701
8.77167	71	1	1	1	1	1	1	26831	1	1	1	2684		1	1	1	1	29678	25691	1	7910.57	8.77167	0	71		1	22533	1	1	14780	1	6219.5	8.77167	0	71		18459	16419	27892	23358	21532	8.77167	18848	71		1	18354	1	1
8.7725	73	1	1	1	1	1	1	1839091	1	1	1	183910		1	1	1	1	1	1	1	1	8.7725	0	73		1	1	1	1	1	1	1	8.7725	0	73		1	1207545	1	1	301887	8.7725	0	73		1	1132647	1	1
8.77333	186	1	1	128	1	113	84	79	1	93	1	50.2		1	69	1	1	96	108	1	39.5714	8.77333	0	186		1	71	11	1	37	1	20.3333	8.77333	0	186		113	52	1	55	55.25	8.77333	0	186		1	42	54	684
8.77417	93	2330	1840	1	2412	1	608	1	1	1	1	719.6		1	1769	1	2388	3811	3876	1585	1918.71	8.77417	0	93		4050	1	1843	3361	1921	2335	2251.83	8.77417	1532.23	93		2726	2319	3374	1	2105	8.77417	0	93		1	1	2066	6058
8.77583	83	1	1134	1	1106	1	1	4123	1	1	4677	1104.6		1	1	1	1	1	5263	1	752.714	8.77583	0	83		1	4919	1092	1	4124	1	1689.67	8.77583	0	83		4849	3559	5524	1	3483.25	8.77583	0	83		1	2479	3492	1
8.77667	113	1	10989	10112	1	14786	8871	9149	1	13178	1	6708.9		8068	1	1	1	1	1	211	1183.43	8.77667	-5525.47	113		17828	6450	12089	1	1	12426	8132.5	8.77667	0	113		1	1	1	1	1	8.77667	0	113		1	5273	1	24979
8.7775	65	1	1	1087	1394	1	990	2324	1	1	1	580.1		1	1	1	1	1	1	1	1	8.7775	0	65		1	1	1069	2349	1	1	570.333	8.7775	0	65		1	1	3609	1	903	8.7775	0	65		1	1	1	3297
8.77833	375	1	1	1	1	1	1	1	1	1	1	1		1	1	1	1	1	12	1	2.57143	8.77833	0	375		1	1	1	1	12	1	2.83333	8.77833	0	375		1	1	1	1	1	8.77833	#DIV/0!	375		1	1	1	1
8.77917	296	1	1	1	1	1	1	1	279	1	1	28.8		1	1	1	1	1	1	1	1	8.77917	0	296		1	1	1	1	1	1	1	8.77917	0	296		1	1	1	1	1	8.77917	0	296		1	1	1	1
8.78	78	1	1	1	1	1	7287	45923	1	1	1	5321.8		1	1	1	1	1	1	5041	721	8.78	0	78		1	42659	1	1	30817	1	12246.7	8.78	0	78		1	35171	50730	1	21475.8	8.78	0	78		1	26918	30287	7057
8.78083	101	1	1	57282	1	78323	44653	51437	73763	1	68919	37438.1		47665	49679	1	1	51142	60044	2384	30130.9	8.78083	0	101		103470	36270	1	1	26982	1	27787.5	8.78083	0	101		42213	30683	43796	37259	38487.8	8.78083	0	101		66515	29674	28440	161913
8.78167	221	1	1	1	123	1	1	1	1	1	1	13.2		1	1	1	1	1	1	1	1	8.78167	0	221		1	25391	1	31	1	1	4237.67	8.78167	0	221		1	1	30062	1	7516.25	8.78167	0	221		1	1	19991	1
8.7825	100	1	1	1	1	1	1	1	1	1	1	1		1	1	794	1	1	1	1	114.286	8.7825	0	100		1	311628	1	1	1	1	51938.8	8.7825	0	100		1	1	379940	1	94985.8	8.7825	0	100		1	1	1	1
8.78333	107	1	1	1	812	1	1	1	1	1	1	82.1		1	1	555	1	1	1	1	80.1429	8.78333	0	107		1	10987	666	1	1	1	1942.83	8.78333	0	107		1	1	12951	1	3238.5	8.78333	0	107		1	1	1	1
8.78417	112	1	10	1	1	1	1	955	7	1	1	97.9		1	1	1	16	1	1204	1	175	8.78417	0	112		1	682	1	1	1	1	114.5	8.78417	0	112		1	558	760	1	330	8.78417	0	112		1	623	602	1
8.785	123	49	122	1	265	1	1	1	1	1	1	44.3		1	1	1	1	1	1	279	40.7143	8.785	0	123		1	7377	1	1	5506	1	2147.83	8.785	0	123		8330	1	8513	1	4211.25	8.785	4166.95	123		367	1	5944	1
8.78583	105	701	1	1	1	463	1	1	1	1	1	117.2		1	3485	4921	1	6104	4637	1	2735.71	8.78583	2618.51	105		1	20336	609	622	14507	1	6012.67	8.78583	0	105		1	1	24203	4713	7229.5	8.78583	0	105		1	3796	15149	1540
8.78667	150	3159	1	3647	5013	1	3783	4950	1	1	1	2055.7		1	4272	640	1	1	7011	1	1703.86	8.78667	0	150		1	20453	1	1	1	1	3409.67	8.78667	0	150		1	1	26254	3294	7387.5	8.78667	0	150		1	1	1	1
8.7875	69	1	1	1	1	1	1	1	1	1	13853	1386.2		1	1	1	1	1	16111	1	2302.43	8.7875	0	69		1	25090	1	1	1	1	4182.5	8.7875	0	69		1	18306	23412	1	10430	8.7875	0	69		1	1	1	1
8.78833	243	1	1	1	1	1	1	1	1	41	1	5		1	1	1	1	1	1	1	1	8.78833	0	243		7	119	1	1	64	1	32.1667	8.78833	0	243		126	1	122	73	80.5	8.78833	75.5	243		1	1	86	1
8.78917	136	5587	1	1	8723	11023	7284	10287	13569	10089	19923	8648.7		1	8393	1	1	1	13594	1	3141.71	8.78917	0	136		14543	7840	6938	14801	7060	1	8530.5	8.78917	0	136		1	1	1	7530	1883.25	8.78917	0	136		1	5925	7588	1
8.79	244	1	1	1	1	1	1	6939	1	1	1	694.8		1	1	1	1	10164	1	1	1452.86	8.79	0	244		1	9064	93	1	2928	1	2014.67	8.79	0	244		3051	4068	6034	1	3288.5	8.79	0	244		1	3115	4185	1
8.79083	120	1	1	1	1	1	1	12424	1	1	1	1243.3		1	1	1230	1	1	1	1	176.571	8.79083	0	120		1	15373	1	1	1	1	2563	8.79083	0	120		7500	9239	14327	1	7766.75	8.79083	6523.45	120		1	6529	1	1
8.79167	572	1	1	44	1	1	1	1	1	1	1	5.3		1	21	1	1	1	1	1	3.85714	8.79167	0	572		1	1	1	1	10	1	2.5	8.79167	0	572		1	1	1	1	1	8.79167	0	572		1	1	1	1
8.7925	163	1	59	1	1	1	1	1564	1	1	1	163.1		1	1	6773	1	1	1841	1	1231.29	8.7925	0	163		108	5164	128	1	4093	1	1582.5	8.7925	0	163		2977	1001	7654	6669	4575.25	8.7925	4412.15	163		1	5557	4494	86
8.79333	80	1	1	1428	2030	1	1	4549	1	1	1	801.4		1	1	1528	1	1	4059	1	798.857	8.79333	0	80		1	4842	962	1	2527	1	1389	8.79333	0	80		1	3359	4564	2406	2582.5	8.79333	0	80		1	2709	2940	1
8.795	87	1	1	1	1	1242	1	41142	1	1	1	4239.2		1	1	7006	1	1	6662	1	1953.29	8.795	0	87		1	31226	1	1	21992	1	8870.33	8.795	0	87		1	25083	36660	6952	17174	8.795	0	87		1	23365	21923	3025
8.79583	140	1	1	1	13	1	1	752	1	1	1	77.3		1	1	866	76	1	1	1	135.286	8.79583	0	140		1	781	80	1	717	54	272.333	8.79583	0	140		702	457	1106	911	794	8.79583	716.7	140		1	493	758	1
8.79667	165	1	107	1	1	1	1	1519	1	1	1	163.4		1	1	4022	205	1	3410	195	1119.29	8.79667	0	165		1	3338	227	265	2651	1	1080.5	8.79667	0	165		2195	883	4807	3857	2935.5	8.79667	2772.1	165		1	3369	2843	1
8.7975	458	1	1	1	1	1	1	1	1	1	1	1		1	1	1	1	1	1	1	1	8.7975	#DIV/0!	458		1	1	1	1	1	1	1	8.7975	#DIV/0!	458		1	1	1	1	1	8.7975	#DIV/0!	458		1	1	1	1
8.79833	74	1	1	1	1	1	1	1	1	1	1	1		1	35247	36098	1	1	30030	1	14482.7	8.79833	14481.7	74		1	141677	1	1	100976	1	40442.8	8.79833	0	74		1	1	175514	35762	52819.5	8.79833	0	74		1	29144	104127	13276
8.79917	91	1	1	1	1	1	1	672	1	1	1	68.1		1	1	1128	1	1	1	1	162	8.79917	0	91		230	1	177	1	1	1	68.5	8.79917	0	91		1	1	1	1	1	8.79917	0	91		1	1	1	1154
8.8	60	1	295	1	1	1	1	1	1	1	1	30.4		1	3992	4570	1	1	4761	1	1903.86	8.8	1873.46	60		1	14914	1	1	7588	1	3751	8.8	0	60		10604	1	17202	4466	8068.25	8.8	8037.85	60		1	1	10196	3731
8.80083	73	1	1	1	1	1	1	1	1	1	1	1		1	389736	425958	1	1	338497	1	164885	8.80083	164884	73		1	1450261	1	1	1078720	1	421498	8.80083	0	73		1	1	1866211	422600	572203	8.80083	572202	73		1	327221	1149282	143663
8.80167	134	1	1	1	449	1	1	1	1	1	1	45.8		1	3840	3611	1	5015	3513	1	2283.14	8.80167	2237.34	134		1	8486	1	1	6728	1	2536.33	8.80167	0	134		7566	1	10520	3784	5467.75	8.80167	5421.95	134		1	3134	6976	1158
8.8025	88	1	1	1	1	1	1	3075	1	465	1	354.8		280	3120	3236	1	4028	3051	1	1959.57	8.8025	1604.77	88		302	9887	424	501	6503	1	2936.33	8.8025	0	88		1	1	11451	3203	3664	8.8025	0	88		1	2447	7293	2711
8.80333	207	1	1	1	1	1	1	257513	1	1	1	25752.2		1	270243	277406	3769	353596	222203	1	161031	8.80333	135279	207		1	207289	1	6241	150980	3345	61309.5	8.80333	0	207		122092	1	307918	269674	174921	8.80333	149169	207		1	223450	171764	1
8.80417	161	1	11	1	1	12	1	2810	1	1	1	284		1	2839	3026	1	3677	2562	1	1729.57	8.80417	1445.57	161		13	3846	1	1	2968	1	1138.33	8.80417	0	161		3177	1	3695	2816	2422.25	8.80417	2138.25	161		1	2474	2957	216
8.805	90	1	1	1	282	1	1	1	1	1	1	29.1		231	1	1271	398	1	1	321	317.714	8.805	0	90		326	5210	1	1	3543	1	1513.67	8.805	0	90		1	1	6807	768	1894.25	8.805	0	90		1	3781	3914	1
8.80583	86	1	1	1	1	1	1	33871	1	1	1	3388		1	1	876	1	1	36397	1	5325.43	8.80583	0	86		1	24821	239	1	1	1	4177.33	8.80583	0	86		1	20186	29001	1	12297.2	8.80583	0	86		1	20020	18857	1038
8.80667	72	1	1	1	1	470988	608448	580758	1	1	257040	191724		1	598000	7851	1	800138	533697	1	277098	8.80667	0	72		1	625378	1	1	288719	1	152350	8.80667	0	72		479699	389853	521476	654184	511303	8.80667	319579	72		752860	526227	312267	1
8.8075	176	1	1	1	1	1	1	1	1	1	1	1		1	1	1895	14	1	1	1	273.429	8.8075	0	176		1	19644	63	1	14471	1	5696.83	8.8075	0	176		1	1	22871	2042	6228.75	8.8075	0	176		1	1	15483	100
8.80833	64	1	1	1	1	1	574	1	1	1	1986	256.8		1	1	1	1	1	1877	325	315.286	8.80833	0	64		1	2599	676	656	1621	555	1018	8.80833	0	64		1712	2271	2952	1	1734	8.80833	1477.2	64		1	1355	2014	1
8.80917	125	1	1	1	1	1	1	1	1	1	1	1		46	1	389	1	1	1	1	62.8571	8.80917	0	125		1	1894	1	1	1417	1	552.5	8.80917	0	125		2022	1	2069	509	1150.25	8.80917	1149.25	125		1	1	1498	126
8.81	132	1	1	1	594	1	1	1	1	1	1	60.3		1	1	2264	1	1	1	1	324.286	8.81	0	132		1	25603	423	574	1	1	4433.83	8.81	0	132		1	1	34104	1	8526.75	8.81	0	132		1	1	1	4942
8.81083	131	1	1	1	2692	1	1	1	1	1	1	270.1		1	1	7231	1	1	1	1	1033.86	8.81083	0	131		3281	82702	1	2629	1	1	14769.2	8.81083	0	131		1	1	109837	1	27460	8.81083	0	131		1	1	1	36012
8.81167	169	1	1	1	67	82	112	1	1	1	1	26.8		28	1	1	1	1	1	1	4.85714	8.81167	0	169		1	1	1	1	1	1	1	8.81167	0	169		1	1	1	1	1	8.81167	0	169		1	1	1	83
8.8125	81	1	1	1	1	1	1	4202	1	1	1	421.1		1	3712	11023	1	1	4387	1	2732.29	8.8125	0	81		705	1	680	1	1	1	231.5	8.8125	0	81		1	1	1	3961	991	8.8125	0	81		1	2926	1	1
8.81333	316	1	1	1	8	19	1	1	4	1	1	3.8		1	43	1	1	1	1	1	7	8.81333	0	316		1	8805	8	1	1	1	1469.5	8.81333	0	316		1	1	10486	1	2622.25	8.81333	0	316		1	1	6978	1
8.81417	149	1	1	1	1803	1	1	1	1	1	1	181.2		1	1	3265	1	1	1	1	467.286	8.81417	0	149		1	1	1185	1	1	1	198.333	8.81417	0	149		1	1	1	1	1	8.81417	0	149		1	1	1	6272
8.815	156	1	9	1	1	1	1	77	59	1	1	15.2		5	1	1415	1	1	74	26	217.571	8.815	0	156		1	1194	1	1	1	28	204.333	8.815	0	156		1	1	1229	82	328.25	8.815	0	156		1	1	1	87
8.81583	147	1	1	1	1	1	1	1	1	1	60493	6050.2		37448	1	32391	1	1	1	1	9977.71	8.81583	0	147		30472	572629	1	1	1	1	100518	8.81583	0	147		1	1	785529	1	196383	8.81583	0	147		1	1	1	54285
8.81667	170	1	279	508	1	1	1	1	1	1	1	79.5		1	1	914	493	1	1	459	267.143	8.81667	0	170		1	8445	475	887	1	1	1635	8.81667	0	170		3765	1	7390	1	2789.25	8.81667	2709.75	170		1	1	1	1
8.8175	148	1	1	1	4052	1	1	1	1	1	8192	1225.2		1	1	3203	3399	1	1	1	943.857	8.8175	0	148		1	103193	1	1	1	1	17199.7	8.8175	0	148		1	1	138912	1	34728.8	8.8175	0	148		1	1	1	5312
8.81833	144	178	459	427	343	1	1	1	1	156	1	156.8		1	1	179	467	1	1	1	93	8.81833	0	144		323	4903	246	225	1	1	949.833	8.81833	0	144		1	1	6628	1	1657.75	8.81833	0	144		1	1	1	991
8.81917	339	1	1	1	1	19	1	1	1	1	1	2.8		1	1	1	1	1	1	6	1.71429	8.81917	0	339		1	1	1	1	1	1	1	8.81917	0	339		1	1	1	1	1	8.81917	0	339		1	3	1	1
8.82	338	1	1	1	1	11	1	1	1	1	1	2		1	1	1	1	1	1	1	1	8.82	0	338		1	1	4	1	1	1	1.5	8.82	0	338		1	1	1	1	1	8.82	0	338		1	1	15	1
8.82083	429	1	1	1	1	1	1	1	1	20	1	2.9		1	1	1	1	1	1	1	1	8.82083	0	429		1	1	1	1	1	1	1	8.82083	0	429		1	8	1	1	2.75	8.82083	0	429		1	1	1	1
8.82167	158	1	1	1	1	1	1	1	1	1	1	1		1	1	1	1	1	1	1	1	8.82167	#DIV/0!	158		1	1	1	1	1	1	1	8.82167	#DIV/0!	158		1	1	1	1	1	8.82167	#DIV/0!	158		1	1	1	1
8.8225	95	1	451	1	1032	1	1	1849	1	1	1	333.9		685	1	1	1	1	3596	1	612.286	8.8225	0	95		1097	4274	828	1428	2289	1	1652.83	8.8225	1318.93	95		1	1758	3114	2665	1884.5	8.8225	1550.6	95		1	1682	2435	1782
8.82333	199	1	1	125	1	1	94	122	107	69	85	60.6		1	140	78	1	167	1	140	75.4286	8.82333	0	199		1	1	1	1	1	21	4.33333	8.82333	-56.2667	199		1	69	1	1	18	8.82333	0	199		1	86	1	1
8.82417	305	1	1	1	1	1	1	55	1	1	11	7.4		1	1	1	1	1	1	1	1	8.82417	0	305		1	46	1	1	39	1	14.8333	8.82417	0	305		1	1	1	5	2	8.82417	0	305		1	1	1	1
8.825	121	4207	1472	3791	5280	1951	3380	3684	3788	1231	1306	3009		1396	3663	309	4702	5324	1	1887	2468.86	8.825	0	121		3176	1	2320	4371	1561	1377	2134.33	8.825	0	121		1	1	1	1	1	8.825	-3008	121		11661	1	1	3005
8.82667	457	1	1	5	1	1	15	1	1	1	1	2.8		1	1	1	1	1	1	1	1	8.82667	0	457		1	1	1	1	1	1	1	8.82667	0	457		1	1	1	1	1	8.82667	0	457		1	1	1	1
8.8275	131	8609	8493	10078	11027	7034	6674	7292	7363	7351	3878	7779.9		7225	1	1	11080	10016	1	11276	5657.14	8.8275	0	131		11798	1	9997	11901	1	8666	7060.67	8.8275	0	131		1	1	1	1	1	8.8275	-7778.9	131		18103	1	1	1
8.82833	75	32957	1	39934	39943	1	28458	31207	40562	33397	30298	27675.8		35633	31782	40238	1	40216	30115	37585	30795.7	8.82833	0	75		1	133229	6534	1	84825	39914	44084	8.82833	0	75		103739	90094	142706	32459	92249.5	8.82833	64573.7	75		63782	1	91257	38927
8.82917	73	369850	478515	507238	566039	390822	341014	324090	427758	400288	235083	404070		409254	1	42756	655816	551892	1	565340	317866	8.82917	0	73		502568	1	500866	667166	1	465697	356050	8.82917	0	73		1	1	1	1	1	8.82917	-404069	73		937989	1	1	1
8.83	148	5465	4936	1	6401	5125	5553	2139	5664	5901	1	4118.6		5965	2585	1	5423	7326	1	7654	4136.43	8.83	0	148		2956	1	3702	4117	1	4791	2594.67	8.83	0	148		1	1	1	1	1	8.83	-4117.6	148		7931	1	1	1
8.83083	61	1	1	1	1	1	1	1	1	1	1	1		1	7097	7033	1	1	7090	1	3032	8.83083	3031	61		155	29099	1	1	15072	1	7388.17	8.83083	0	61		20117	21351	32311	8072	20462.8	8.83083	20461.8	61		1	1	13414	8639
8.83167	160	312	323	1014	398	666	949	816	1367	1036	1645	852.6		1264	681	27	502	1	1046	673	599.143	8.83167	0	160		152	741	1	1	1	1273	361.5	8.83167	0	160		1	1	1	1	1	8.83167	-851.6	160		679	849	1	1
8.8325	89	9076	1	1	1	1	1	1	1	1	1	908.5		1	97	15890	1	8755	1	1	3535.14	8.8325	0	89		1	20573	1	1	14151	1	5788	8.8325	0	89		1	1	1	7057	1765	8.8325	0	89		1	7578	14756	19364
8.83333	83	2734	3948	3209	3115	1	2372	4885	6286	5570	8255	4037.5		4204	4051	27924	4203	1	5667	1	6578.71	8.83333	0	83		1	1	1	1	1	1	1	8.83333	-4036.5	83		27346	1	1	4105	7863.25	8.83333	0	83		5132	2656	4354	11727
8.83417	68	878	1	733	1	1	1	10829	1	1	2211	1465.7		1	1178	329	410	1	1	1	274.429	8.83417	0	68		1	1	1	1	6635	1	1106.67	8.83417	0	68		7030	7871	11789	1408	7024.5	8.83417	5558.8	68		1249	6171	7393	1
8.835	70	3280	3323	1	3885	1	1	1	1	1	1	1049.5		2038	1	17228	2251	1	1	1	3074.43	8.835	0	70		1	1	1	4247	1	1	708.667	8.835	0	70		15384	1	1	1	3846.75	8.835	0	70		1	1	1	8250
8.83583	208	1	1	70872	78890	53066	50640	1	56808	54363	35721	40036.3		56582	1	1	90622	1	1	76599	31972.4	8.83583	0	208		1	1	71540	91755	1	63857	37859.2	8.83583	0	208		1	29994	1	1	7499.25	8.83583	0	208		129609	1	1	1
8.83667	295	1	1	40593	45067	30333	1	1	1	31199	1	14719.8		32484	1	1	52214	1	1	43808	18358.6	8.83667	0	295		1	1	40957	52303	1	36583	21641	8.83667	0	295		1	17016	1	1	4254.75	8.83667	0	295		73050	1	1	1
8.8375	311	1	1	1	1	1	13	1	1	1	1	2.2		1	1	1	1	1	1	1	1	8.8375	0	311		6	1	1	1	27	1	6.16667	8.8375	0	311		1	28	32	1	15.5	8.8375	13.3	311		1	1	1	1
8.83833	63	1159	284	942	989	953	1	1	1247	1	1032	660.9		614	882	3595	496	1189	1	1117	1127.71	8.83833	0	63		1424	1	731	1152	1	1	551.667	8.83833	0	63		3290	1	1	1	823.25	8.83833	0	63		951	1	1	1
8.83917	67	2265	1707	2284	1	1	1	4273	4341	4123	5803	2479.9		1	678	25645	3366	1	5038	1	4961.43	8.83917	0	67		1	5623	1	1	1	1	938	8.83917	0	67		23171	1	1	1	5793.5	8.83917	0	67		4440	1873	1	2340
8.84	123	497	1	565	1	471	1	1297	1493	1	2274	660.1		1	1	10206	1	1	1	1	1458.86	8.84	0	123		408	1	1	1	1	1	68.8333	8.84	0	123		10841	1	1	1	2711	8.84	0	123		1	531	1	1
8.84083	168	422	149	621	1	1	1	1378	1512	1462	2293	784		1	1	10859	1	1	1	1	1552.14	8.84083	0	168		500	1	1	1	1	1	84.1667	8.84083	0	168		11941	1	1	1	2986	8.84083	0	168		1	1	1	1
8.84167	93	1	835	1	1	1	1	3134	2695	1	3934	1060.4		1	2073	17097	1	1	1	1322	2928	8.84167	0	93		1	5528	1	1	1	1	922.167	8.84167	0	93		1	1	1	1	1	8.84167	0	93		2377	1	1	3589
8.8425	127	1	1	1227	179	1	1265	1	1950	1	2662	728.8		1801	1083	802	529	199	1537	1052	1000.43	8.8425	0	127		1	1434	1	1	1	1	239.833	8.8425	0	127		1	141	1	1	36	8.8425	0	127		1	1425	1	2320
8.84333	167	4274	651	3547	1229	1	1	7813	9105	1	13363	3998.5		1	1	62286	974	2549	1	1523	9619.29	8.84333	0	167		1	5279	1234	1989	1	1713	1702.83	8.84333	0	167		68380	1	6945	1	18831.8	8.84333	0	167		2341	3848	1	1671
8.84417	153	9732	1	7969	1	1	7222	14948	17022	1	22088	7898.5		1	1	94370	1	1	1	6079	14350.6	8.84417	0	153		6523	25160	1	1	23033	1	9119.83	8.84417	0	153		95279	1	32064	1	31836.2	8.84417	0	153		1	1	24558	6970
8.845	262	1	50	125	172	1	117	1	1	130	42	64		103	1	1	99	84	1	57	49.4286	8.845	0	262		1	1	159	19	1	119	50	8.845	0	262		1	1	1	1	1	8.845	0	262		1	1	1	1
8.84583	69	3749	1	3453	5104	1	1	1	5967	1	6473	2475.1		1	2930	29691	1	1	1	1	4660.86	8.84583	0	69		1	1	1	1	1	1	1	8.84583	-2474.1	69		1	1	1	1	1	8.84583	0	69		1	1	1	3557
8.84667	157	1	1	162	23	1	113	60	155	142	119	77.7		202	56	594	1	111	167	1	161.714	8.84667	0	157		1	1	1	1	1	1	1	8.84667	-76.7	157		1	1	1	69	18	8.84667	0	157		194	114	1	3813
8.8475	84	1426	1	2005	2332	1	2076	1	4124	3318	5097	2038.1		2485	1	15311	967	1	1	1	2681	8.8475	0	84		1	1	1	1	1	1	1	8.8475	-2037.1	84		1	1	1	1	1	8.8475	-2037.1	84		1	1	1	2773
8.84833	154	1942	570	1707	922	1364	1426	1	4428	1	6458	1881.9		868	1	29772	1	1	1	1041	4526.43	8.84833	0	154		1196	3966	915	1304	4040	1	1903.67	8.84833	0	154		30737	1	4681	1	8855	8.84833	0	154		1660	1874	4179	846
8.84917	219	1	722	302	336	229	224	217	257	231	158	267.7		238	273	268	415	302	210	327	290.429	8.84917	0	219		1	289	308	370	223	269	243.333	8.84917	0	219		211	103	300	247	215.25	8.84917	0	219		499	182	209	1158
8.85	297	1	1	1	8195	5641	1	1	1	5867	1	1971		6156	1	1	9729	1	1	8219	3444	8.85	0	297		1	1	7743	9665	1	6999	4068.33	8.85	0	297		1	1	1	1	1	8.85	0	297		1	1	1	1
8.85083	136	1	1351	1	1	1	1	1	1	4529	1	588.8		1	1	25913	3121	7941	1	1	5282.71	8.85083	0	136		1	1	1	1	1	1	1	8.85083	0	136		26456	1	1	1	6614.75	8.85083	0	136		8490	1	1	1
8.85167	112	1	1	1	1	1	40	1	1	1	148	19.6		63	1	1419	1	1	1	1	212.429	8.85167	0	112		1	1	1	1	1	1	1	8.85167	0	112		1	1	1	39	10.5	8.85167	0	112		1	1	1	5627
8.8525	185	1	1	33	1	1	18	1	1	1	1	5.9		21	1	1	47	1	39	1	15.8571	8.8525	0	185		43	36	42	1	3	1	21	8.8525	0	185		1	1	1	38	10.25	8.8525	0	185		1	22	7	1
8.85333	523	1	1	1	1	1	1	11	1	15	1	3.4		1	1	1	1	1	1	1	1	8.85333	0	523		1	1	1	1	1	1	1	8.85333	0	523		1	1	1	1	1	8.85333	0	523		1	1	1	1
8.85417	525	1	1	1	1	1	1	1	1	1	1	1		1	1	1	1	1	1	1	1	8.85417	#DIV/0!	525		1	1	1	1	1	1	1	8.85417	#DIV/0!	525		1	1	1	1	1	8.85417	#DIV/0!	525		1	1	21	1
8.855	546	1	1	1	1	1	1	1	1	1	1	1		1	1	1	1	1	1	1	1	8.855	#DIV/0!	546		1	1	1	1	1	1	1	8.855	#DIV/0!	546		1	1	1	1	1	8.855	#DIV/0!	546		29	1	1	1
8.85583	174	19	301	904	505	688	866	175	1301	962	1658	737.9		1156	688	1	699	1	1045	755	620.714	8.85583	0	174		1	965	524	518	1	1262	545.167	8.85583	0	174		1	1	1	1	1	8.85583	-736.9	174		1	826	1	1
8.85667	164	1	1	1	1	1071	1	1	1	1	1	108		1	1	1	1869	1	1	1	267.857	8.85667	0	164		1	1	1435	1706	310	1	575.667	8.85667	0	164		831	1	1	1	208.5	8.85667	0	164		1	1	1	1
8.8575	489	1	1	1	1	1	1	1	1	1	1	1		1	1	1	1	1	1	1	1	8.8575	#DIV/0!	489		1	1	1	1	1	1	1	8.8575	#DIV/0!	489		1	1	1	36	9.75	8.8575	0	489		1	1	1	1
8.85833	181	1	1	200	224	156	147	153	167	154	93	129.6		156	163	150	276	190	144	228	186.714	8.85833	0	181		1	356	201	230	1	171	160	8.85833	0	181		1	69	386	173	157.25	8.85833	0	181		316	129	296	1
8.85917	159	1	1965	7071	1621	4913	6846	5808	9815	7273	12589	5790.2		9549	5445	1	3691	1	7162	5939	4541.14	8.85917	0	159		6614	6656	4638	1	1	9680	4598.33	8.85917	0	159		1	842	1	1	211.25	8.85917	-5578.95	159		2564	6826	1	1
8.86	72	1	11453	1	1	1	1	1	1	14340	1	2580.1		12954	1	11402	14804	24702	1	12222	10869.4	8.86	8289.33	72		14374	1	12652	15426	1	15375	9638.17	8.86	7058.07	72		1	1	1	1	1	8.86	0	72		1	13000	1	1
8.86083	563	1	1	1	1	1	7	1	1	1	1	1.6		1	1	1	1	1	1	1	1	8.86083	0	563		1	1	1	1	1	1	1	8.86083	0	563		1	14	1	1	4.25	8.86083	0	563		1	1	1	15
8.86167	481	1	1	1	1	1	1	1	1	1	1	1		1	1	1	1	1	1	1	1	8.86167	#DIV/0!	481		1	1	1	1	1	1	1	8.86167	#DIV/0!	481		1	1	1	1	1	8.86167	#DIV/0!	481		1	1	1	1
8.8625	443	1	1	1	1	1	1	1	1	1	25	3.4		1	1	1	1	1	1	1	1	8.8625	0	443		1	1	1	1	1	1	1	8.8625	0	443		1	1	1	1	1	8.8625	0	443		1	1	1	1
8.86417	242	1	1	7	1	1	6	25	1	1	21	6.5		39	10	1	1	1	9	1	8.85714	8.86417	0	242		1	1	1	1	1	43	8	8.86417	0	242		1	28	1	1	7.75	8.86417	0	242		1	28	4	99
8.865	152	1	1	37826	17579	1	1	1	101532	1	149331	30627.4		1	1	689861	15023	1	106684	21140	118959	8.865	0	152		1	88398	17284	27875	85527	1	36514.3	8.865	0	152		661834	1	93532	1	188842	8.865	0	152		1	1	89358	22259
8.86583	476	1	1	1	1	1	1	1	1	1	31	4		1	1	1	1	1	1	1	1	8.86583	0	476		1	1	1	1	1	1	1	8.86583	0	476		1	1	1	1	1	8.86583	0	476		1	1	1	31
8.86667	66	1	5362	1	12793	11387	1	1	1	12612	1	4216		8041	1	39603	10803	1	1	17172	10803.1	8.86667	0	66		16097	1	10273	13344	1	9388	8184	8.86667	0	66		32540	1	1	1	8135.75	8.86667	0	66		1	1	1	1
8.8675	377	1	1	1	1	13	1	1	1	1	1	2.2		1	1	1	1	1	1	1	1	8.8675	0	377		1	1	1	1	1	1	1	8.8675	0	377		1	1	1	1	1	8.8675	0	377		1	1	1	1
8.86833	124	1	1818	1	2158	1930	1	1	1	1	1	591.3		1814	1	6928	2540	1	1	2216	1928.71	8.86833	0	124		2442	1	1978	2663	1	2130	1535.83	8.86833	0	124		7494	1	1	1	1874.25	8.86833	0	124		1	1	1	1
8.86917	166	1	3689	1	1	1	1	1	1	1	1	369.8		1	1	78374	1	1	1	1	11197.1	8.86917	0	166		1	1	1	1	1	1	1	8.86917	0	166		85104	1	1	1	21276.8	8.86917	0	166		1	1	1	1
8.87	107	1	1	1	1	1	1	1	1	1	1	1		1	1	1	1	1	1	1	1	8.87	#DIV/0!	107		960	1	1	1	1	1	160.833	8.87	0	107		1	1	1	1	1	8.87	#DIV/0!	107		1	1	1	1
8.87083	100	1	749	1	1	1	1	1	1	1	1	75.8		1	1	1	1	1	1	1	1	8.87083	0	100		1	1	1	1	1	1	1	8.87083	0	100		5104	1	1	1	1276.75	8.87083	0	100		1	1	1	2204
8.87167	226	1	1	1	1	1	79	57	58	1	74	27.4		1	1	1	7	1	70	33	16.2857	8.87167	0	226		5	1	1	19	1	35	10.3333	8.87167	0	226		76	1	107	1	46.25	8.87167	0	226		1	1	1	13
8.8725	435	1	1	1	1	21	1	1	1	1	1	3		1	1	1	1	1	20	1	3.71429	8.8725	0	435		1	1	1	1	1	1	1	8.8725	0	435		7	1	1	1	2.5	8.8725	0	435		1	1	1	1
8.87333	90	1	1059	1284	1	1	1	1950	1	1	1	430		1	1	1	1	1	3266	1	467.429	8.87333	0	90		2125	1	1353	1	2199	1	946.667	8.87333	0	90		2136	2645	1	1288	1517.5	8.87333	0	90		1	1	2174	2134
8.87583	88	1	3719	1	1	3063	1	825	1	1	667	828		1	662	1	4890	1	1	1	793.857	8.87583	0	88		4042	377	3649	4756	1	3627	2742	8.87583	1914	88		109	1	1	1	28	8.87583	0	88		1	461	1	6174
8.87667	156	1	1270	2740	1	1	4958	1	6210	4618	6374	2617.4		2536	1	1	1	82	1	1598	602.857	8.87667	0	156		1	485	1	1	1	3942	738.5	8.87667	0	156		208	18	86	155	116.75	8.87667	0	156		21	1	79	5710
8.8775	111	1	11305	22849	1	1	39637	1	49592	37231	50009	21062.7		20861	1	1	145	902	1	14566	5211	8.8775	0	111		9	1	109	1	442	31308	5311.67	8.8775	0	111		1056	1	1	771	457.25	8.8775	0	111		786	1	1	47955
8.87833	155	1	11006	24161	589	1	40829	1	51540	39119	51681	21892.8		22476	1	1	1	2710	1	14405	5656.43	8.87833	0	155		1	1	1	1	1808	31443	5542.5	8.87833	0	155		2866	1	1	2389	1314.25	8.87833	0	155		3240	1	1	1
8.87917	544	1	16	1	1	1	1	1	1	1	1	2.5		10	1	1	1	1	1	1	2.28571	8.87917	0	544		1	1	1	1	1	1	1	8.87917	0	544		1	8	1	1	2.75	8.87917	0	544		1	1	8	1
8.88	362	1	1	1	1	1	1	1	1	1	1	1		1	1	1	1	1	19	1	3.57143	8.88	0	362		1	1	1	1	1	15	3.33333	8.88	0	362		1	1	1	1	1	8.88	#DIV/0!	362		1	1	1	1
8.88083	133	1360	30071	1403	1	1163	763	1	1	1	1	3476.5		1	1127	610	1	1	1	1	248.857	8.88083	0	133		31877	1	1	1	1	1	5313.67	8.88083	0	133		1	1	1	1	1	8.88083	0	133		1	1	1	48270
8.88167	274	1	50	1	20	1	1	1	1	1	1	7.8		1	1	1	1	1	1	1	1	8.88167	0	274		1	1	1	1	1	1	1	8.88167	0	274		1	1	1	1	1	8.88167	0	274		1	1	1	98
8.88333	224	1	1	1	1	1	41	7	8	1	46	10.8		6	1	1	1	11	1	10	4.42857	8.88333	0	224		1	1	1	1	1	1	1	8.88333	0	224		1	12	1	1	3.75	8.88333	0	224		1	4	39	1
8.88417	121	2842	241	2351	3257	1068	2313	2292	2859	329	808	1836		481	2183	1	2631	3043	2084	516	1562.71	8.88417	0	121		2125	2292	961	2762	1	360	1416.83	8.88417	0	121		1	1231	4352	2638	2055.5	8.88417	0	121		7637	1157	1	4822
8.885	118	420	1	1	1	1	1	1	1	1	1	42.9		1	1	1	1	1	1	1	1	8.885	0	118		1	1	1	1	1	1	1	8.885	0	118		1	1	1	1	1	8.885	0	118		1	223	1	1
8.88583	183	1	1	1	1	35	6	54	42	1	3	14.5		43	38	1	1	94	39	1	31	8.88583	0	183		1	1	102	1	1	8	19	8.88583	0	183		1	1	1	1	1	8.88583	0	183		161	1	26	64
8.88667	105	1570	1	1749	1	1	1	1	1	1	1	332.7		1	5	1	1	1048	1	1	151.143	8.88667	0	105		6038	732	1	1	1	1	1129	8.88667	0	105		1	1	1	1	1	8.88667	0	105		1	1	1	10782
8.8875	95	1	2037	1	1	1	1	1	1	1	1	204.6		1	1	17244	1	18137	1	1	5055.14	8.8875	0	95		1	1	1	1	1	1	1	8.8875	0	95		16337	10526	1	15494	10589.5	8.8875	10384.9	95		1	1	1	1
8.88833	210	1	5943	1	1	1	1	1	4	1	1	595.5		52	1	1	1	1	1	1	8.28571	8.88833	0	210		6240	1	1	1	1	1	1040.83	8.88833	0	210		1	1	1	1	1	8.88833	0	210		1	1	1	9665
8.88917	73	1	1	1	1	1	1	1	1	1	1	1		54875	1	1	1	1	1	1	7840.14	8.88917	0	73		1	1	1	1	1	1	1	8.88917	#DIV/0!	73		1	34340	1	1	8585.75	8.88917	0	73		51340	1	1	792792
8.89	191	1	42704	1	1	1	340	1	1	432	1	4348.3		777	510	1	290	1	1	1	225.857	8.89	0	191		46583	1525	1	1	1	1	8018.67	8.89	0	191		1	588	1	1	147.75	8.89	0	191		1	1	1	69300
8.89083	253	1	1	1	1	1	1	1	1	1	1	1		1	1	1	1	1	1	1	1	8.89083	#DIV/0!	253		1	1	1	1	1	1	1	8.89083	#DIV/0!	253		1	1	1	1	1	8.89083	#DIV/0!	253		1	1	1	88
8.89167	159	1	232	1	4110	1	1	1	1	1	1	435		1	1	1	1	1	1	1	1	8.89167	0	159		1	1	1	3634	7866	1	1917.33	8.89167	0	159		7772	9865	4993	3741	6592.75	8.89167	6157.75	159		66	1	7511	3442
8.8925	365	1	7	7	1	17	1	1	1	1	11	4.8		1	1	1	1	1	2	1	1.14286	8.8925	0	365		1	1	1	1	1	1	1	8.8925	0	365		1	1	1	1	1	8.8925	0	365		1	1	1	1
8.89333	77	9492	6311	11795	1	13328	10482	12931	17408	12917	12594	10725.9		8864	9271	1	1	9421	15838	10703	7728.43	8.89333	0	77		1	6935	1	1	1	12843	3297	8.89333	-7428.9	77		1	4490	1	7919	3102.75	8.89333	-7623.15	77		6909	1	1	15481
8.89417	154	31984	27098	31583	33910	49464	32342	43465	52040	50801	59283	41197		35746	35765	1	35442	32385	50563	36787	32384.1	8.89417	0	154		48037	18049	28377	46710	19810	40269	33542	8.89417	0	154		1	18901	30118	27994	19253.5	8.89417	-21943.5	154		40426	21972	20571	43574
8.895	152	771157	624037	717984	788541	1089864	718664	945893	1110105	1104298	1188604	905915		780134	824913	1	825394	748083	1080482	847174	729454	8.895	0	152		1071190	428525	654553	1077814	449417	879117	760103	8.895	0	152		1	437574	699467	647748	446198	8.895	-459717	152		946357	491869	474138	1005208
8.89583	79	112942	1	1	45566	66682	1	93633	60703	50181	70631	50034.1		42140	116088	1	46693	38328	99145	38942	54476.7	8.89583	0	79		54993	4684	43436	56769	28675	41548	38350.8	8.89583	0	79		1	24343	1	18152	10624.2	8.89583	0	79		33682	1	20425	9784
8.89667	75	29804	16175	1	1	30570	1	1	1	1	1	7655.6		1	1	33696	38681	25400	1	1	13968.7	8.89667	0	75		39806	1	35681	45683	20956	1	23688	8.89667	0	75		23967	23413	1	23241	17655.5	8.89667	0	75		29800	1	1	71753
8.8975	71	14923	10765	13894	13239	18739	14699	18588	26279	19553	21837	17251.6		13530	13641	6434	15074	12780	23318	15087	14266.3	8.8975	0	71		18478	8431	11020	19005	7855	14387	13196	8.8975	0	71		1	8088	19841	10911	9710.25	8.8975	-7541.35	71		15865	10062	8338	8282
8.89833	102	777	1	618	1	690	246	1	1112	801	1	424.8		1	1	1	1	665	1	819	212.714	8.89833	0	102		1	620	664	731	1	761	463	8.89833	0	102		1	648	1	582	308	8.89833	0	102		706	1	1	4591
8.89917	223	1	1	1	1	1	1	36	1	1	16	6		1	1	1	1	1	1	1	1	8.89917	0	223		73	27	1	1	20	1	20.5	8.89917	0	223		1	27	1	1	7.5	8.89917	0	223		1	1	58	97
8.9	452	1	5	1	31	1	1	1	1	1	18	6.1		1	1	1	1	21	1	1	3.85714	8.9	0	452		1	1	1	1	1	1	1	8.9	0	452		12	1	1	1	3.75	8.9	0	452		1	1	10	1
8.90083	89	1	1	1	14630	1	1	1	1	1	1	1463.9		1	1	1	1	1	1	1	1	8.90083	0	89		1	1	1	15791	22913	1	6451.33	8.90083	0	89		20445	27957	1	1	12101	8.90083	10637.1	89		1	1	21957	1
8.90167	430	1	1	18	1	1	1	1	1	1	1	2.7		1	1	1	1	1	1	1	1	8.90167	0	430		1	1	1	1	1	1	1	8.90167	0	430		1	1	11	1	3.5	8.90167	0	430		1	1	1	1
8.9025	428	1	4	1	1	1	1	1	1	1	1	1.3		1	33	1	1	1	1	21	8.42857	8.9025	0	428		1	1	1	1	1	1	1	8.9025	0	428		1	1	1	1	1	8.9025	0	428		1	1	1	1
8.90333	157	1	1	1	1	889	1	2135	1	1	1	303.2		1	746	196	404	1	3096	1	635	8.90333	0	157		1150	2003	1029	1456	1	1	940	8.90333	0	157		1	1778	2377	1	1039.25	8.90333	0	157		1	1839	2020	1
8.90417	158	1	1	58	1	61	145	1	167	120	163	71.8		78	1	1	1	1	246	1	47	8.90417	0	158		81	1	72	56	1	257	78	8.90417	0	158		45	28	1	1	18.75	8.90417	0	158		1	1	1	245
8.90583	172	1	1	138	1	164	196	145	283	200	249	137.8		214	113	1	91	8	242	132	114.429	8.90583	0	172		97	120	141	212	1	228	133.167	8.90583	0	172		205	1	132	1	84.75	8.90583	0	172		1	275	1	1
8.90667	165	1	392	1	1	1	1	1	1	1	1	40.1		1	1	1	553	1	1	1	79.8571	8.90667	0	165		754	1	1	1	1	1	126.5	8.90667	0	165		1	1	1	1	1	8.90667	0	165		1	1	1	1
8.9075	446	1	19	1	1	1	1	1	1	1	8	3.5		1	1	1	1	1	1	1	1	8.9075	0	446		1	1	1	1	1	1	1	8.9075	0	446		1	1	1	1	1	8.9075	0	446		1	1	1	1
8.90833	112	1	1272	2825	1	2688	4942	5153	6332	4644	6396	3425.4		2693	1515	1	1558	299	4734	1596	1770.86	8.90833	0	112		3157	2695	2763	3980	284	3779	2776.33	8.90833	0	112		345	1	1	301	162	8.90833	-3263.4	112		307	4101	1	1
8.90917	317	1	6	1	1	1	1	1	1	1	1	1.5		1	1	39	1	1	1	1	6.42857	8.90917	0	317		1	1	1	1	1	1	1	8.90917	0	317		1	1	1	1	1	8.90917	0	317		1	1	1	1
8.91	455	1	1	1	72	22	1	3	1	1	1	10.4		1	18	1	1	1	1	1	3.42857	8.91	0	455		1	1	1	1	1	1	1	8.91	0	455		1	1	1	1	1	8.91	0	455		1	1	1	1
8.91083	398	1	1	1	1	1	1	1	1	1	1	1		1	1	1	1	1	16	1	3.14286	8.91083	0	398		26	1	1	1	1	1	5.16667	8.91083	0	398		1	1	1	1	1	8.91083	#DIV/0!	398		1	1	1	1
8.91167	145	1	10	323	1	335	1	1	1	1	1	67.5		271	263	582	321	360	1	1	257	8.91167	189.5	145		343	1	1	439	493	1	213	8.91167	0	145		429	554	1	341	331.25	8.91167	263.75	145		1	1	519	4024
8.9125	242	1	1	1	1	1	1	1	1	1	1	1		1	1	1	1	1	1	1	1	8.9125	#DIV/0!	242		1	1	1	1	1	1	1	8.9125	#DIV/0!	242		1	1	1	1	1	8.9125	#DIV/0!	242		1	1	4	1
8.91333	118	1	1	1	1	305	1	1	1	1	1	31.4		287	1	1	1	3000	3482	1	967.571	8.91333	0	118		458	1704	233	355	1087	283	686.667	8.91333	655.267	118		1	933	5265	2353	2138	8.91333	2106.6	118		1	2508	1749	2533
8.91417	117	1	1	1	1976	1	1	1	1	1	1	198.5		952	1	1	1	26199	29285	1	8062.86	8.91417	0	117		1	13859	1	1	15331	1	4865.67	8.91417	0	117		1	8150	45501	21864	18879	8.91417	18680.5	117		1	21437	18557	15337
8.915	120	1	232	1	1944	1	1	205	1	1	1	238.8		1	708	1	639	1	1	1	193.143	8.915	0	120		2117	1	807	2171	1	1	849.667	8.915	0	120		1	1	1	1	1	8.915	0	120		1	366	1	1
8.91583	331	1	1	1	1	1	19	1	1	1	9	3.6		1	1	1	1	1	1	1	1	8.91583	0	331		1	1	1	1	16	1	3.5	8.91583	0	331		28	1	1	1	7.75	8.91583	0	331		1	1	1	1
8.91667	160	54	59	326	493	1	373	1	636	1	1	194.5		281	292	65	1	214	647	1	214.429	8.91667	0	160		907	1	607	602	986	252	559.167	8.91667	364.667	160		1060	1273	1061	578	993	8.91667	798.5	160		1	1	961	686
8.9175	449	1	1	1	1	1	1	1	1	1	17	2.6		1	1	1	1	23	1	1	4.14286	8.9175	0	449		1	1	1	1	1	1	1	8.9175	0	449		1	1	1	1	1	8.9175	0	449		1	1	1	1
8.91833	220	1	125	1	1	1	1	1	1	1	1	13.4		1	1	1	225	1	247	1	68.1429	8.91833	0	220		144	1	184	1	43	1	62.3333	8.91833	0	220		1	1	180	37	54.75	8.91833	0	220		1	87	75	1
8.91917	330	1	1	1	1	1	1	41	1	1	14	6.3		1	1	1	1	1	1	1	1	8.91917	0	330		1	1	1	12	1	1	2.83333	8.91917	0	330		21	19	1	1	10.5	8.91917	0	330		1	1	1	1
8.92	140	1	216	292	326	436	266	352	381	415	461	314.6		284	275	1	312	1	1	255	161.286	8.92	-153.314	140		353	175	280	400	1	359	261.333	8.92	0	140		1	1	1	26	7.25	8.92	-307.35	140		1	190	1	1
8.92083	155	2455	1	1	21387	22213	1	42655	1	1	1	8871.6		1	13399	1	14240	1	40175	1	9688.29	8.92083	0	155		27675	23439	24425	34166	32370	1	23679.3	8.92083	0	155		17515	27249	44116	15725	26151.2	8.92083	0	155		1	34355	31294	6242
8.92167	209	1	1	1	1	1	1	1	1	1	262	27.1		1	1	127	1	555	676	1	194.571	8.92167	0	209		1	1	1	1	1	1	1	8.92167	0	209		1	399	765	366	382.75	8.92167	355.65	209		713	281	1	1
8.9225	208	1	137	1	1	1	1	613	1	1	376	113.3		1	1	133	1	792	1042	1	281.571	8.9225	0	208		1	1	109	1	1	1	19	8.9225	0	208		1	688	1120	1	452.5	8.9225	0	208		1	490	659	1
8.92333	111	1707	1	1	20973	20381	1	41456	1	1	1	8452.3		1	12720	1	12380	12238	37731	1	10724.6	8.92333	0	111		26225	22997	23553	32429	33073	1	23046.3	8.92333	0	111		16907	27698	44980	15843	26357	8.92333	0	111		1	33648	31977	1
8.92417	191	1	1	1	1	1	1	641	939	1	442	202.9		1	1	362	1	510	1288	1	309.143	8.92417	0	191		1	1	1	455	1	1	76.6667	8.92417	0	191		1	1	1485	423	477.5	8.92417	0	191		1	566	569	1
8.925	103	1	1	1	940	953	2402	2310	1	1	1	661.1		1	1469	1837	1	1408	1	1	674	8.925	0	103		1137	665	726	1	647	699	645.833	8.925	0	103		1	1	1	1399	350.5	8.925	0	103		653	1085	1	1
8.92583	207	1	1	1	714	1	1260	3490	1	1	1	547.1		1	1	612	1	4458	5671	1	1535	8.92583	0	207		1	1	1	1	3100	1	517.5	8.92583	0	207		1	3780	6116	3914	3452.75	8.92583	2905.65	207		6033	2712	3736	1
8.92667	241	1	16	39	1	1	1	1	1	1	1	6.3		27	31	1	1	1	1	1	9	8.92667	0	241		1	1	48	1	1	27	13.1667	8.92667	0	241		1	1	1	1	1	8.92667	0	241		1	24	36	71
8.9275	214	1	1	11	1	35	1	1	8	1	1	6.1		3	5	1	69	1	1	1	11.5714	8.9275	0	214		1	138	1	1	94	1	39.3333	8.9275	0	214		1	1	195	5	50.5	8.9275	0	214		1	1	1	1
8.92833	104	1	495	1	383	922	723	1	1252	461	1	424		281	679	514	296	1	1245	312	475.429	8.92833	0	104		920	1	545	670	1	796	488.833	8.92833	0	104		265	201	1192	1	414.75	8.92833	0	104		593	407	339	1
8.92917	77	1	6198	1	14255	1	1	1	1	1	1	2046.1		1	1	1	7806	1	1	6330	2020.14	8.92917	0	77		17930	1	11259	18422	1	1	7935.67	8.92917	0	77		5925	5779	15612	6643	8489.75	8.92917	6443.65	77		1	1	3109	1
8.93	170	1	643	1	1575	1	1	1	1	1	1	222.6		1	883	1	1145	1	1	1	290.429	8.93	0	170		1981	1	1582	1	1461	1	837.833	8.93	0	170		1079	1354	2650	1	1271	8.93	1048.4	170		1	1	1485	1
8.93083	224	1	1	1	1	1	1	1	8	1	33	4.9		1	1	1	1	1	1	1	1	8.93083	0	224		1	1	1	1	1	1	1	8.93083	0	224		1	1	1	1	1	8.93083	0	224		1	1	1	1
8.93167	223	1	1	1	65	1	1	1	28	1	37	13.7		1	1	1	1	1	1	1	1	8.93167	0	223		1	1	1	1	1	1	1	8.93167	0	223		24	1	1	1	6.75	8.93167	0	223		1	1	1	1
8.9325	175	1	1	1	1	1	1	1	10	1	1	1.9		1	1	1	1	83	1	1	12.7143	8.9325	0	175		62	5	76	1	40	1	30.8333	8.9325	28.9333	175		1	1	1	1	1	8.9325	0	175		1	1	1	1
8.93333	61	6253	1	1145	9059	1	1	1	1	1	1	1646.4		1	1	1	1	1	1	5880	840.857	8.93333	0	61		1	1	1	7778	4145	1	1987.83	8.93333	0	61		1	1	1	1	1	8.93333	0	61		1	1	1	12866
8.93417	75	24934	1	50716	47872	59524	65073	78476	99795	73412	90963	59076.6		50812	37252	22557	34957	1	82293	27241	36444.7	8.93417	0	75		60674	41994	49654	74742	45910	57689	55110.5	8.93417	0	75		29615	45183	77735	28304	45209.2	8.93417	0	75		26147	52063	46936	1
8.935	113	1240	1	1	1496	1	2116	1617	4574	1	1	1104.8		785	1	568	1176	1	3452	1415	1056.86	8.935	0	113		1188	580	1	1602	2380	862	1102.17	8.935	0	113		1492	2017	5309	1354	2543	8.935	0	113		1126	1334	2302	1161
8.93583	148	5996	1	1	7583	3887	5393	863	5550	6353	8810	4443.7		5398	3627	2859	5008	5852	9664	7999	5772.43	8.93583	0	148		1	4978	3418	4609	1	2894	2650.17	8.93583	0	148		1	588	1	2056	661.5	8.93583	-3782.2	148		5983	1	1	1
8.93667	119	2126	1	2125	647	1	1878	1371	1386	1487	1295	1231.7		1029	2084	2029	297	1532	2265	2154	1627.14	8.93667	0	119		698	167	1	655	952	1	412.333	8.93667	-819.367	119		510	700	3054	1269	1383.25	8.93667	0	119		2528	1277	429	1
8.9375	117	43267	35910	39711	57044	18747	27928	26635	35689	26945	21567	33344.3		17320	39511	33502	47206	1	1293	33725	24651.1	8.9375	0	117		28609	1	29800	39119	1	17489	19169.8	8.9375	0	117		4486	1	2336	1	1706	8.9375	-31638.3	117		53519	1	1	1
8.93833	73	35854	27109	59670	45176	68671	41735	15455	106375	67718	34357	50212		1	42866	64577	37887	65011	111139	54905	53769.4	8.93833	0	73		38122	54361	28700	78016	26153	62226	47929.7	8.93833	0	73		1	1	137089	54809	47975	8.93833	0	73		84723	55579	28371	1
8.93917	147	41823	16868	3125	44205	47373	31821	35055	62281	53037	66990	40257.8		44671	28539	36076	23237	1	76249	44331	36157.7	8.93917	0	147		52079	36897	40360	52555	7623	40286	38300	8.93917	0	147		1	9691	28030	4123	10461.2	8.93917	-29796.6	147		37734	1	1	1
8.94	161	1	1	1	1	12	80	95	113	1	1	30.6		1	1	1	1	72	1	1	11.1429	8.94	0	161		115	1	1	63	1	1	30.3333	8.94	0	161		1	1	1	10	3.25	8.94	0	161		1	74	1	1
8.9425	228	1	1	27	1	1	1	26	1	1	1	6.1		1	1	38	1	1	1	1	6.28571	8.9425	0	228		1	1	1	1	1	1	1	8.9425	0	228		1	1	1	1	1	8.9425	0	228		1	1	1	1
8.94417	75	1	1	26620	1	1	1	1	1	1	1	2662.9		1	1	1	1	19886	1	12660	4650.14	8.94417	0	75		1	1	1	1	1	1	1	8.94417	0	75		1	1	1	1	1	8.94417	0	75		1	1	1	1
8.945	112	1	1	1	2372	1	1	1	1	1	1	238.1		1	1	1	1	1307	1	1	187.571	8.945	0	112		1	1	1	1	4045	1	675	8.945	0	112		2022	3326	5318	1761	3106.75	8.945	2868.65	112		1	1	3830	693
8.94583	171	1	1	1	165	1	1	1	1	79	1	25.2		177	110	1	103	1	98	95	83.5714	8.94583	0	171		235	1	169	236	244	1	147.667	8.94583	122.467	171		96	36	216	59	101.75	8.94583	0	171		1	1	199	11
8.9475	538	1	1	1	1	1	1	1	1	1	13	2.2		1	1	1	1	1	1	1	1	8.9475	0	538		1	1	1	1	1	1	1	8.9475	0	538		1	1	1	1	1	8.9475	0	538		1	1	1	1
8.94833	251	1	1	1	204	131	119	79	114	108	99	85.7		64	115	1	1	87	81	1	50	8.94833	0	251		1	10	154	1	67	100	55.5	8.94833	0	251		31	9	163	110	78.25	8.94833	0	251		176	61	60	1
8.94917	88	1658	1178	1339	1868	1	1522	1	1	1	1118	868.7		1	1	1	1337	900	1	1890	590.143	8.94917	0	88		1	304	1033	1720	219	864	690.167	8.94917	0	88		1	395	3146	1	885.75	8.94917	0	88		1335	1	1	1
8.95083	107	414	1	275	732	331	1	1	293	242	1	229.1		153	114	1	1	327	1	356	136.143	8.95083	0	107		645	161	389	600	1	1	299.5	8.95083	0	107		1	65	1	1	17	8.95083	0	107		1	78	1	1852
8.95167	149	1	2212	2694	4409	2401	1	1	3246	4861	1	1982.7		3199	1	1	1357	1	1	2766	1046.57	8.95167	0	149		3110	1	2369	3521	574	1110	1780.83	8.95167	0	149		1157	1	787	1	486.5	8.95167	0	149		1	1	1397	1
8.95333	103	1	1	1	2488	1	1	1	1	1	1	249.7		1	1	1	1	1	1	4123	589.857	8.95333	0	103		1	182	1	1	1	1	31.1667	8.95333	0	103		1	1	1	1	1	8.95333	0	103		1	1	1	1
8.95417	121	1	1	1782	1	1	1	1	1	1	1	179.1		1	1	1	1	1	1275	117	199.571	8.95417	0	121		1	1	311	1	1	1	52.6667	8.95417	0	121		1	1	3522	1	881.25	8.95417	0	121		1	756	1	1
8.955	81	1	10727	1	19758	1	1	1	1	1	1	3049.3		1	1	1	1	1	1	1	1	8.955	0	81		29036	1	1	1	24336	1	8896	8.955	0	81		14332	21831	34811	12395	20842.2	8.955	17793	81		1	1	23963	14518
8.95583	79	1	1	1	1	1	1	1	1	1	1	1		1	1	1	1	1	1	1	1	8.95583	#DIV/0!	79		1	1	22866	1	1	1	3811.83	8.95583	0	79		1	1	1	1	1	8.95583	#DIV/0!	79		1	1	1	44393
8.95667	115	1311	990	2695	2631	2371	1	1	1	1	570	1057.2		1583	1849	2436	1	1337	4177	3220	2086.14	8.95667	0	115		1019	1	2138	1	1	1600	793.333	8.95667	0	115		1	1	6468	1223	1923.25	8.95667	0	115		1681	1	1	1
8.9575	163	1	4	1	1	1	1	1	13	1	37	6.1		1	1	1	1	167	1	1	24.7143	8.9575	0	163		17	1	1	1	95	1	19.3333	8.9575	0	163		114	1	21	73	52.25	8.9575	46.15	163		1	74	130	1
8.95833	72	9479	1	1	1	6646	8498	1	13917	1	1	3854.6		1	6124	1	7066	1	1	8309	3071.86	8.95833	0	72		9076	1	1	9024	1	1	3017.33	8.95833	0	72		1	1	1	1	1	8.95833	0	72		8063	1	1	18201
8.95917	249	1	1446	1	1	1	1	1	1	1	1	145.5		1	23	1	1	1	1	1	4.14286	8.95917	0	249		1485	27	1	1	14	1	254.833	8.95917	0	249		1	1	1	1	1	8.95917	0	249		1	1	1	2414
8.96	89	1	1	13207	1	1	1	1	41910	18020	12063	8520.6		1	1	15621	1	14456	1	27001	8154.57	8.96	0	89		1	11723	1	1	14786	1	4418.83	8.96	0	89		1	1	77989	13940	22982.8	8.96	0	89		1	1	15354	1
8.96083	252	1	77	63	1	31	30	38	37	8	1	28.7		1	10	53	48	1	51	40	29.1429	8.96083	0	252		104	38	1	46	40	7	39.3333	8.96083	0	252		1	1	1	1	1	8.96083	0	252		1	31	61	146
8.96167	119	1	1417	1	1	1038	870	117	1	1	1	344.8		1	1	1	2130	1	1	1	305.143	8.96167	0	119		1818	1	1517	2181	1	917	1072.5	8.96167	0	119		1	1	1	1	1	8.96167	0	119		1	336	1	1
8.9625	73	1	1	77684	86511	52503	1	1	1	62932	10981	29061.6		42156	1	1	1	1	1	85065	18175.1	8.9625	0	73		1	1	41254	93354	1	46627	30206.3	8.9625	0	73		1	1	1	1	1	8.9625	0	73		1	1	1	80529
8.96333	128	1	1	1	1	117	1	1	1	45	1	17		1	1	1	1	1	140	123	38.2857	8.96333	0	128		1	1	136	222	359	110	138.167	8.96333	121.167	128		215	312	506	81	278.5	8.96333	261.5	128		1	1	330	86
8.96417	295	1	1	1	1	1	1	13	1	1	1	2.2		1	105	1	1	1	1	1	15.8571	8.96417	0	295		1	1	1	1	311	1	52.6667	8.96417	0	295		483	1	1	10	123.75	8.96417	0	295		1	1	1	1
8.965	174	1	1	1	1	1	1	1	120	1	1	12.9		1	1	1	1	1	1	1	1	8.965	0	174		140	1	1	1	1	1	24.1667	8.965	0	174		1	1	1	1	1	8.965	0	174		1	1	1	1
8.96583	77	5250	1	1	8349	1	1	1	1	1	1	1360.7		1	3660	21755	3708	1	1	30032	8451.14	8.96583	0	77		8278	1	5788	1	1	1	2345	8.96583	0	77		1	1	1	1	1	8.96583	0	77		1	1	75	1
8.96667	126	1	1031	1	2187	1	1	1	1	1	1	322.6		1	1463	112	1	1	1	1	225.714	8.96667	0	126		1	1	1	1	3273	1	546.333	8.96667	0	126		1789	2684	4448	1429	2587.5	8.96667	2264.9	126		34	1	3091	1244
8.96833	102	1	1	1406	2164	917	1	1	1716	1424	967	859.8		1	1	1	2372	1	650	1602	661.143	8.96833	0	102		1	1	1219	1539	1	940	616.833	8.96833	0	102		1	1	1	1	1	8.96833	0	102		1	1	1	1
8.96917	188	1	110	1	1	44	1	1	1	1	1	16.2		1	1	1	1	1	1	1	1	8.96917	0	188		444	1	1	1	29	198	112.333	8.96917	0	188		1	1	52	1	13.75	8.96917	0	188		1	1	22	1
8.97	492	1	1	1	1	1	14	1	1	1	1	2.3		1	1	1	1	35	1	1	5.85714	8.97	0	492		1	1	1	1	1	1	1	8.97	0	492		1	1	1	1	1	8.97	0	492		1	1	1	1
8.97083	87	1	1	1502	1	1420	1	578	2367	1475	1488	883.4		1438	1	2173	1921	1	1	2103	1091.14	8.97083	0	87		3439	1	1996	2779	1	1105	1553.5	8.97083	0	87		1	1	1	459	115.5	8.97083	0	87		1	329	1	610
8.97167	134	320	142	694	858	417	349	245	444	519	1	398.9		391	147	897	641	236	1	722	433.571	8.97167	0	134		584	152	461	392	1	367	326.167	8.97167	0	134		1	134	615	218	242	8.97167	0	134		230	206	1	2500
8.9725	91	1448	1	819	1	1	1	1	2157	1	1	443.1		1	1	1	1	1	1	1466	210.286	8.9725	0	91		1	1	567	1	1	1	95.3333	8.9725	0	91		1	1	3358	719	1019.75	8.9725	0	91		1	1	1	3457
8.97417	148	1	4955	1	1	1	1	1	1	1	1	496.4		1	1	1	1	1	1	1	1	8.97417	0	148		6158	1	1	1	104	1	1044.33	8.97417	0	148		4433	1	1	1	1109	8.97417	0	148		4036	1	1	1
8.975	157	1	142	324	558	206	242	400	353	223	260	270.9		1	322	644	305	728	1	165	309.429	8.975	0	157		340	1	270	470	1	1	180.5	8.975	0	157		1	1	1	1	1	8.975	-269.9	157		543	1	1	1
8.97583	94	49	1	1	1	1	1	1	1	1	1	5.8		1	1	1	1	1	1	1	1	8.97583	0	94		1	1	1	1	1	1	1	8.97583	0	94		1	1	48	1	12.75	8.97583	0	94		1	1	1	8759
8.9775	146	254	1	1	1	100	1	1	648	1	1	100.9		1	1	124	1	1	1	215	49.1429	8.9775	0	146		227	1	1	186	159	7	96.8333	8.9775	0	146		438	1	1	1	110.25	8.9775	0	146		1	1	156	805
8.97833	62	307	1	1	1	1	1	1	1	1	1	31.6		1	1	1	1	1	1	1	1	8.97833	0	62		1	63	457	1	1	194	119.5	8.97833	0	62		1	1	1	1	1	8.97833	0	62		1	1	225	7400
8.97917	96	332	9927	1	1	1	1	1	1	1	1	1026.7		1	1	1	13131	1	481	1	1945.29	8.97917	0	96		17648	1	1	1	1	1	2942.17	8.97917	0	96		1	1	1	1	1	8.97917	0	96		1	184	1	16394
8.98	207	1873	1	1787	698	682	1	1	1638	1	975	765.7		1	1291	4497	1	1258	1	1039	1155.43	8.98	0	207		962	7121	540	1149	1	629	1733.67	8.98	0	207		5027	1	1	1238	1566.75	8.98	0	207		1	1	1	1
8.98083	208	40	1	316	1	1	1	175	319	157	1	101.2		1	1	853	176	1	1	1	147.714	8.98083	0	208		183	1286	1	231	141	1	307.167	8.98083	0	208		1	1	1	223	56.5	8.98083	0	208		1	1	175	1
8.98167	107	231	150	1	494	252	214	189	1	240	180	195.2		1	1	817	156	1	1	1521	356.857	8.98167	0	107		1	1	1	1	47	210	43.5	8.98167	-151.7	107		1	1	532	1	133.75	8.98167	0	107		1	91	138	1
8.9825	254	1	65	1	1	1	1	1	1	1	3	7.6		1	1	1	1	1	19	1	3.57143	8.9825	0	254		74	1	1	1	1	1	13.1667	8.9825	0	254		1	1	1	1	1	8.9825	0	254		1	1	1	116
8.98333	201	1	445	483	516	368	342	370	356	369	249	349.9		367	394	370	602	456	298	492	425.571	8.98333	0	201		442	337	466	567	274	437	420.5	8.98333	0	201		207	179	473	392	312.75	8.98333	0	201		768	317	275	785
8.98417	483	1	1	1	1	1	1	1	1	1	1	1		1	1	1	1	1	1	1	1	8.98417	#DIV/0!	483		1	1	1	1	1	1	1	8.98417	#DIV/0!	483		1	1	1	19	5.5	8.98417	0	483		1	1	1	1
8.985	192	177	156	14	1	1	268	170	493	1	276	155.7		124	119	2029	105	1	303	693	482	8.985	0	192		477	178	89	295	105	501	274.167	8.985	0	192		88	73	656	1	204.5	8.985	0	192		1	94	1	947
8.98583	71	1	5415	1	4793	1	13147	11125	27355	1	1	6184		1	4957	1	1	1	1	10325	2183.86	8.98583	0	71		1	3385	1	1	1	1	565	8.98583	0	71		1	1	23798	1	5950.25	8.98583	0	71		1	1	1	21235
8.98667	89	1	1	1	1	1	40325	33116	86173	1	1	15962.1		1	1	1	1	1	1	1	1	8.98667	0	89		1	1	1	1	1	1	1	8.98667	0	89		1	1	1	1	1	8.98667	0	89		1	1	1	1
8.9875	114	1	1245	2694	1	1	10805	8581	22875	3952	3590	5374.5		1	1	3412	1	1	1	6387	1400.57	8.9875	0	114		1	2567	1	1	1	1	428.667	8.9875	0	114		1	1	19265	1	4817	8.9875	0	114		1	1	1	1
8.98833	100	1	1	1	1	1	1	1	1	1	1	1		1	1	1	1	1	1	1	1	8.98833	#DIV/0!	100		1	1	1	1	1	1	1	8.98833	#DIV/0!	100		1	1	1	1	1	8.98833	#DIV/0!	100		1	1	1	1
8.98917	115	1	1550	2406	1	2544	3119	2635	5911	2209	682	2105.8		1613	1523	3338	2892	1	1	4803	2024.43	8.98917	0	115		2869	683	1688	3335	2002	1641	2036.33	8.98917	0	115		1456	969	9016	1	2860.5	8.98917	0	115		1	1	1525	1
8.99	60	1	1940	2337	2481	2877	3110	3339	7145	1	2442	2567.3		1808	1566	1482	3174	1	7400	1928	2479.86	8.99	0	60		3495	1	1	3677	1	2005	1530	8.99	0	60		1	1399	9476	1888	3191	8.99	0	60		2342	1600	2096	7568
8.99083	68	1	966	1	1	1	1083	1	1	1	919	297.5		1	1	1	1112	1	1	1	159.714	8.99083	0	68		1	379	1	1	1	1	64	8.99083	0	68		1	524	1	1	131.75	8.99083	0	68		1	596	606	13906
8.99167	130	1	833	1611	662	1853	2456	1	5617	2699	1979	1771.2		1317	862	443	1588	1	6573	1	1540.71	8.99167	0	130		1540	995	661	1345	1654	1204	1233.17	8.99167	0	130		1004	1089	8306	1	2600	8.99167	0	130		1274	1961	1729	3593
8.9925	147	22672	10235	1	1	43863	23841	26532	54049	41276	1	22247.1		1	23968	28003	1	28726	1	47139	18262.7	8.9925	0	147		1	1	1	1	1	1	1	8.9925	-22246.1	147		1	1	23707	1	5927.5	8.9925	0	147		25322	7776	1	43029
8.99333	116	1750	1709	1	1	1135	1	995	1	691	1482	776.6		133	1	1316	1	1058	1858	2174	934.429	8.99333	0	116		2071	1	934	1834	69	845	959	8.99333	0	116		1673	1195	2798	1	1416.75	8.99333	0	116		1	1846	543	5220
8.99417	145	1	413	823	273	974	1660	1002	3416	1354	1025	1094.1		635	1	349	942	1	2852	407	741	8.99417	0	145		947	343	249	1052	609	688	648	8.99417	0	145		365	387	3131	1	971	8.99417	0	145		512	963	648	2691
8.995	66	3897	486	2139	1	3295	1	1	311	4434	419	1498.4		1	811	7129	1	1	1	12869	2973.29	8.995	0	66		9759	1	2124	1	1	1	1981.17	8.995	0	66		3113	1	1	1	779	8.995	0	66		1	1	1	7397
8.99583	127	27	81	1	1	1	73	1	1	1	1	18.8		1	85	195	144	1	1	412	119.857	8.99583	0	127		286	1	1	374	203	1	144.333	8.99583	125.533	127		1	1	375	1	94.5	8.99583	0	127		1	140	329	1
8.99667	74	1	3592	5144	4157	6037	4175	1	1	7660	4418	3518.6		3883	2669	7237	1	1	16946	7261	5428.29	8.99667	0	74		6922	3147	1	6786	1428	4435	3786.5	8.99667	0	74		1470	1242	23819	1	6633	8.99667	0	74		1	5576	1	20190
8.9975	67	667	1	1143	1725	1053	817	1	1	990	1	639.9		680	1	1	1	1	1281	1146	444.429	8.9975	0	67		1	151	1142	1739	338	1	562	8.9975	0	67		1	1	1	515	129.5	8.9975	0	67		1	284	1	35977
8.99833	84	1189	1	1063	1615	1228	1535	1492	3355	1546	1264	1428.8		812	691	769	1	1	2796	731	828.714	8.99833	0	84		1	383	1	1	818	937	356.833	8.99833	-1071.97	84		1	1	3590	1	898.25	8.99833	0	84		1770	629	905	1
8.99917	295	1	1	22	1	1	1	1	24	1	48	10.1		1	1	1	1	13	1	1	2.71429	8.99917	0	295		1	624	1	1	58	1	114.333	8.99917	0	295		45	57	1	1	26	8.99917	0	295		1	1	1	1
9	99	1588	1	1258	1	1573	1	1	4153	1	1511	1008.8		1	1	627	1767	1	1	827	460.714	9	0	99		1	356	982	1	1245	657	540.333	9	0	99		1	1	4758	1	1190.25	9	0	99		1895	1146	1	1
9.00083	129	3146	1633	2139	1238	2501	3446	2142	7539	3538	2445	2976.7		1533	609	374	2644	1183	1	501	977.857	9.00083	-1998.84	129		2462	653	1209	2614	1285	1704	1654.5	9.00083	0	129		1	880	5630	1354	1966.25	9.00083	0	129		1842	1801	1364	6521
9.00167	89	45824	1	27077	16477	32899	53885	50229	108071	45778	27339	40758		21065	14724	7677	32215	18220	95996	1	27128.3	9.00167	0	89		29343	12647	14551	32188	22944	21338	22168.5	9.00167	0	89		12806	15648	115602	24720	42194	9.00167	0	89		25692	34408	23647	65115
9.0025	114	10918	3809	6788	3370	8176	14080	12911	28367	11559	7927	10790.5		5237	4955	1	7636	4356	24796	2124	7015	9.0025	0	114		6938	2943	3078	7493	5679	5221	5225.33	9.0025	0	114		3220	3730	29152	6008	10527.5	9.0025	0	114		5704	8721	5919	15782
9.00333	83	1	1	1	1	1	1539	2141	4540	2097	1	1032.3		1	1	1010	1	1	3708	1144	838	9.00333	0	83		1	1	1	1	1	1	1	9.00333	0	83		1	1	4938	1	1235.25	9.00333	0	83		3092	1220	1	40336
9.00417	100	1	1	1299	1	1	1	2064	4043	1841	1968	1122		1	859	4149	1757	1	1	1	967	9.00417	0	100		1876	379	1	1760	1	1350	894.5	9.00417	0	100		1	710	6992	1	1926	9.00417	0	100		1	1774	1339	1
9.005	202	1	1	1	1	1	1	33	45	1	4	8.9		1	1	1	1	1	1	1	1	9.005	0	202		1	1	1	1	25	1	5	9.005	0	202		16	23	64	1	26	9.005	0	202		65	16	1	35
9.00583	70	1	1	2389	3733	2956	1	360	1	3265	2277	1498.4		1905	1	3276	1	1	5456	2880	1931.43	9.00583	0	70		1	609	2849	4245	1479	2140	1887.17	9.00583	0	70		817	1	7454	2168	2610	9.00583	0	70		1	1843	1958	1
9.00667	90	1	1491	2472	1352	2821	5250	4568	10084	4036	2810	3488.5		1848	1	1523	2560	1	8883	2227	2434.71	9.00667	0	90		2602	1044	1303	2846	2071	1921	1964.5	9.00667	0	90		1212	1370	10737	2141	3865	9.00667	0	90		1	3236	2155	5776
9.0075	88	1	1	1189	1063	1383	1	1976	3294	1711	1178	1179.7		737	717	1257	1	1	3686	1951	1192.86	9.0075	0	88		1354	357	739	1467	547	918	897	9.0075	0	88		169	1	4510	902	1395.5	9.0075	0	88		1108	1271	909	3767
9.00833	136	1	1	1	1	1	1	1	1	1	1	1		1	1	738	1	1	1	871	230.571	9.00833	0	136		1	177	1	1	1	1	30.3333	9.00833	0	136		1	1	1	1	1	9.00833	#DIV/0!	136		1	1	1	37754
9.00917	251	1	35	1	1	1	1	1	1	1	25	6.8		1	1	1	1	1	1	1	1	9.00917	0	251		1	1	1	1	1	1	1	9.00917	0	251		1	1	1	1	1	9.00917	0	251		1	1	1	1
9.01	104	1	1	1	1	656	1	1059	1537	980	1	423.8		466	1	1145	455	1	2020	1158	749.429	9.01	0	104		707	1	306	498	426	561	416.5	9.01	0	104		1	7	2388	1	599.25	9.01	0	104		1	767	450	1
9.01083	98	1	1	366	1	1	218	415	684	393	1	208.1		1	317	838	1	411	1	1317	412.286	9.01083	0	98		1	152	1	1	298	281	122.333	9.01083	0	98		259	1	1016	349	406.25	9.01083	0	98		847	229	348	14986
9.01167	253	1	1	11	1	1	1	19	46	1	5	8.7		1	1	144	1	1	1	246	56.4286	9.01167	0	253		1	1	1	61	1	1	11	9.01167	0	253		1	1	59	1	15.5	9.01167	0	253		1	23	38	1
9.0125	105	1	1	1	1	2618	1	1	4724	1	1	735		2112	1	12224	1	1	1	16909	4464.14	9.0125	0	105		3162	1	2406	1	1	1	928.667	9.0125	0	105		1	1	1	1	1	9.0125	0	105		1	1	1	1
9.01333	148	1	1	1	4966	3123	4676	1	4022	4799	1	2159.1		1	2585	1465	1	1	1	9503	1936.71	9.01333	0	148		1	5422	1	3096	86	1	1434.5	9.01333	0	148		4641	1	1	708	1337.75	9.01333	0	148		1	398	1	3851
9.01417	221	1	253	287	1	1	1	1	307	1	1	85.4		1	1	1617	1	242	1	2138	571.571	9.01417	0	221		6	1	11	31	1	150	33.3333	9.01417	0	221		232	92	1	249	143.5	9.01417	0	221		250	1	1	1
9.015	188	1	1	1	1	1	1	1	1	1	1	1		1	1	1	1	1	1	1	1	9.015	#DIV/0!	188		1	1	1	1	181	1	31	9.015	0	188		1	59	1	1	15.5	9.015	0	188		1	1	1	89
9.01583	218	1	1	1	1	1	4	1	24	1	1	3.6		17	1	65	1	1	1	72	22.5714	9.01583	0	218		1	1	1	1	1	1	1	9.01583	0	218		1	1	1	24	6.75	9.01583	0	218		1	1	1	1
9.01667	102	1	1	1	1	1	1	805	1	932	1	174.5		1	1	1	1	1	1	1	1	9.01667	0	102		1	1	1	1	1	1	1	9.01667	0	102		1	221	1	1	56	9.01667	0	102		757	1	1	1
9.01833	497	1	18	1	1	1	1	1	7	1	32	6.4		1	1	1	1	1	23	19	6.71429	9.01833	0	497		1	16	1	1	1	1	3.5	9.01833	0	497		1	1	1	1	1	9.01833	0	497		1	1	1	1
9.01917	99	1	610	1	1	1	2251	1943	4492	2056	1411	1276.7		1	821	1	1	1	3702	1	646.857	9.01917	0	99		1	1	1	1	1	1	1	9.01917	0	99		1	1	1	1152	288.75	9.01917	0	99		1	1237	1	1
9.02	75	1	1	1	1	12097	1	11832	25065	12355	1	6135.5		7381	1	11018	19379	1	20740	1015	8505	9.02	0	75		23467	1	1	1	1	9004	5412.5	9.02	0	75		1	1	28807	1	7202.5	9.02	0	75		13988	4432	1	59541
9.02083	73	1	55661	46073	23297	47817	31650	1	126608	64751	4866	40072.5		31466	1	74972	73556	1	1	78155	36878.9	9.02083	0	73		42114	12552	11437	59020	15420	35048	29265.2	9.02083	0	73		1	4963	172967	1	44483	9.02083	0	73		1	46399	14269	174297
9.02167	156	1	162	313	1	1	1	1	1	1	255	73.7		196	142	738	348	1	1	979	343.571	9.02167	0	156		1	1	1	1	1	292	49.5	9.02167	0	156		1	1	1	1	1	9.02167	0	156		662	185	1	1
9.0225	301	1	1	1	1	1	1	1	1	1	1	1		1	1	1	1	1	1	1	1	9.0225	#DIV/0!	301		1	1	1	1	1	1	1	9.0225	#DIV/0!	301		1	1	1	1	1	9.0225	#DIV/0!	301		53	1	1	292
9.02333	79	1	1	1	15331	1	1	47743	1	1	1	6308.2		10906	1	26958	15360	1	1	5510	8391	9.02333	0	79		1	1	21506	13533	1	2120	6193.67	9.02333	0	79		1	1	1	1	1	9.02333	0	79		1	1	1	1
9.02417	85	1	1	1100	1726	1	1	385	187	1327	1	473		1	1	1297	1	1	1	1654	422.286	9.02417	0	85		1	1	1	1	1	962	161.167	9.02417	0	85		1	1	3176	1	794.75	9.02417	0	85		1	586	1	2689
9.025	87	1	1	1	1	797	1	912	1	557	637	290.9		676	215	1	1	1	1548	3513	850.714	9.025	0	87		1	1	1113	1553	1	667	556	9.025	0	87		1	1	1497	265	441	9.025	0	87		1	1	1	3789
9.02667	133	1	4113	1	1431	1	1	1	1	1	1	555.2		1	1	6055	1	1044	1	9609	2387.43	9.02667	0	133		3003	1	1	1	1	1	501.333	9.02667	0	133		1	186	1	567	188.75	9.02667	0	133		1	1	1	11503
9.0275	130	2552	536	1699	925	1	3685	3485	7567	2821	2841	2611.2		1345	1259	1	1906	1203	1	905	945.714	9.0275	0	130		2215	546	969	2260	1	1426	1236.17	9.0275	0	130		1	1	1	1684	421.75	9.0275	0	130		2267	54	426	1
9.02833	113	2341	715	1509	1145	1793	3158	2686	6055	2400	1635	2343.7		1077	1283	104	1517	1238	5652	889	1680	9.02833	0	113		1533	1	1	1767	1402	1122	971	9.02833	0	113		782	797	6973	1321	2468.25	9.02833	0	113		1	1947	1401	2899
9.02917	520	1	1	1	1	13	1	1	1	1	1	2.2		1	1	1	1	1	1	1	1	9.02917	0	520		1	1	1	21	1	1	4.33333	9.02917	0	520		1	1	1	1	1	9.02917	0	520		1	1	1	1
9.03	72	9634	7127	7880	5207	6417	9337	10457	15618	8005	5349	8503.1		1	6198	4870	1	7856	13138	5087	5307.29	9.03	0	72		1	1	4736	7980	2985	5994	3616.17	9.03	-4886.93	72		1	1	17022	4741	5441.25	9.03	0	72		1	5621	2022	1
9.03083	152	5746	7251	5895	1	5412	4856	5368	5593	5499	4968	5058.9		3774	5797	1	1	6989	7441	1	3429.14	9.03083	0	152		1	4701	5491	8337	3829	5131	4581.67	9.03083	0	152		6697	3956	7922	5151	5931.5	9.03083	0	152		10162	4113	4440	1
9.03167	117	3553	2018	3921	3381	1	269	1	1	1	1	1314.7		1127	1	1	3914	511	5052	2352	1851.14	9.03167	0	117		3352	1	1	2754	1	1	1018.33	9.03167	0	117		1	1	1	1	1	9.03167	0	117		1	1	419	72653
9.0325	79	79920	1	1	1	1	1	49954	1947	4775	17857	15445.8		12837	86794	1	17748	4567	54026	1	25139.1	9.0325	0	79		6596	1	22154	8739	5391	3680	7760.17	9.0325	0	79		1	2270	1	1	568.25	9.0325	0	79		1	1	1	1
9.03333	73	78955	83456	120055	79467	92521	80572	44392	156541	122024	51038	90902.1		73525	65970	1	102998	35925	149851	1	61181.6	9.03333	0	73		77845	93108	79269	139666	62026	99302	91869.3	9.03333	0	73		1	1	205961	36897	60715	9.03333	0	73		57563	100498	72676	1
9.03417	105	22454	22738	24474	19020	15082	20748	25532	23736	22477	19638	21589.9		15284	20423	254	25492	1	34321	1	13682.3	9.03417	0	105		20216	24295	21075	26804	21573	20204	22361.2	9.03417	0	105		1	1	46061	1	11516	9.03417	0	105		1	25100	24349	19326
9.035	77	40179	40378	43871	34566	27052	35497	45731	41162	38474	35484	38239.4		25958	37841	1	44131	63468	62869	1	33467	9.035	0	77		37285	46316	37362	48382	25390	36679	38569	9.035	0	77		73901	1	84161	45429	50873	9.035	0	77		68950	30972	41490	34907
9.03583	76	3263	2787	3530	3107	2636	2656	3323	3439	3076	2426	3024.3		1953	2837	1	3471	1016	3072	1	1764.43	9.03583	-1259.87	76		3302	2912	2871	4136	1	2836	2676.33	9.03583	0	76		1	1	5807	1	1452.5	9.03583	0	76		1	2514	2700	1
9.03667	139	96	379	381	257	1	397	1	430	373	1	231.6		1	375	1	363	1	658	1	200	9.03667	0	139		333	459	326	412	1	347	313	9.03667	0	139		1	1	795	1	199.5	9.03667	0	139		1	487	440	275
9.0375	92	126	311	95	118	52	59	364	97	129	271	162.2		224	35	61	168	146	173	168	139.286	9.0375	0	92		100	264	104	133	185	97	147.167	9.0375	0	92		1	1	580	1	145.75	9.0375	0	92		1	265	289	327
9.03833	93	424	760	1	1121	1	1	1	1	1	1	231.2		162	1	472	550	584	1	1	253	9.03833	0	93		1	1	1	1	1	1	1	9.03833	0	93		160	1	1	1	40.75	9.03833	0	93		1	1	1	1
9.03917	404	1	12	1	1	1	1	1	1	1	1	2.1		1	1	1	1	1	1	1	1	9.03917	0	404		1	1	1	1	1	1	1	9.03917	0	404		7	1	21	1	7.5	9.03917	0	404		1	1	1	1
9.04	298	1	1	1	1	1	1	1	1	11	1	2		1	1	1	1	1	1	1	1	9.04	0	298		1	1	1	1	1	1	1	9.04	0	298		1	1	1	1	1	9.04	0	298		1	12	21	1
9.04083	247	1	1	1	1	1	1	1	1	1	1	1		1	1	1	1	1	1	1	1	9.04083	#DIV/0!	247		1	48	1	1	32	1	14	9.04083	0	247		22	1	1	1	6.25	9.04083	0	247		1	29	79	1
9.04167	97	1	1	1	1	1	1	1	1	1	1	1		404	1	2275	1	1	1	2906	798.429	9.04167	0	97		1	1	1	1187	553	1	290.667	9.04167	0	97		1	1	1249	707	489.5	9.04167	488.5	97		1	497	631	47622
9.0425	71	1	1	6979	4744	1	1	1	1	10919	12104	3475.2		5171	1	2009	7683	5523	1	4114	3500.29	9.0425	0	71		8815	1	4646	9716	1	4894	4678.83	9.0425	0	71		1662	1	1	1	416.25	9.0425	0	71		11183	1	1	1
9.04333	592	1	1	1	1	1	1	1	1	1	1	1		1	1	1	1	1	1	1	1	9.04333	#DIV/0!	592		1	1	1	1	1	1	1	9.04333	#DIV/0!	592		1	1	1	1	1	9.04333	#DIV/0!	592		1	1	1	1
9.04417	67	1	1	1	645	1	221	1026	1021	572	709	419.8		423	1	504	719	940	1	1	369.857	9.04417	0	67		642	194	1	799	408	421	410.833	9.04417	0	67		1	439	1743	1	546	9.04417	0	67		1393	426	429	1
9.045	166	1	1	426	1	1	418	1	451	369	1	167		1	407	1	1	1	641	1	150.429	9.045	0	166		1	530	387	1	1	383	217.167	9.045	0	166		1	1	556	1	139.75	9.045	0	166		1	337	365	116451
9.04583	279	1	1	1	1	1	1	1	1	1	1	1		1	1	1	1	1	38	24	9.57143	9.04583	0	279		1	24	1	1	35	1	10.5	9.04583	0	279		18	1	1	1	5.25	9.04583	0	279		48	39	72	1
9.04667	112	1	80	181	434	127	136	138	175	121	1	139.4		95	94	128	180	1	144	185	118.143	9.04667	0	112		190	51	134	1	156	87	103.167	9.04667	0	112		1	149	281	1	108	9.04667	0	112		538	93	145	94
9.0475	95	1	1	1	1	765	1	1321	1	837	896	382.5		646	1523	286	1	1	1369	1	546.714	9.0475	0	95		1024	963	1	1418	1059	812	879.5	9.0475	0	95		462	603	2704	1	942.5	9.0475	0	95		1	1009	1145	1
9.04833	68	1	1	965	663	1	1	641	1	1095	1	337		1	1	1	1	642	1	1	92.5714	9.04833	0	68		986	1	561	1112	1	749	568.333	9.04833	0	68		228	329	1	1	139.75	9.04833	0	68		1	473	564	1
9.04917	60	1	1	2821	1	1	1	2304	1	3669	1	880.1		1933	1	1	1	1	1	1	277	9.04917	0	60		3199	1	2002	3770	1	2411	1897.33	9.04917	0	60		1	1	1	1	1	9.04917	0	60		1	511	1330	1
9.05	231	1	20	1	1	1	8	1	31	17	1	8.2		1	32	1	1	1	47	1	12	9.05	0	231		41	39	1	23	1	1	17.6667	9.05	0	231		1	1	44	1	11.75	9.05	0	231		1	1	44	1
9.05083	147	1	1	1	20345	44629	1	28227	59871	41675	62482	25723.3		37450	25330	23263	11124	29770	76153	40895	34855	9.05083	0	147		44972	36986	1	31836	8150	36837	26463.7	9.05083	0	147		1	1	15583	1	3896.5	9.05083	0	147		29678	6221	1	1
9.05167	228	1	445	485	297	1	387	1	456	403	36	251.2		1	364	1	438	5	706	1	216.571	9.05167	0	228		374	547	383	490	24	382	366.667	9.05167	0	228		41	1	870	22	233.5	9.05167	0	228		1	490	509	325
9.0525	89	1	1	22509	16031	1	1	1	1	37498	36352	11239.6		17642	1	8282	30116	1	1	13598	9948.71	9.0525	0	89		29594	5737	14842	32507	1	18685	16894.3	9.0525	0	89		4433	1	1	1	1109	9.0525	0	89		36800	1	1	1
9.05333	253	1	293	337	252	208	309	352	342	290	286	267		207	297	1	322	1	501	1	190	9.05333	0	253		268	387	279	371	288	290	313.833	9.05333	0	253		1	7	634	1	160.75	9.05333	0	253		1	346	358	244
9.05417	198	1	105	119	76	90	118	131	120	100	113	97.3		77	131	1	121	1	193	1	75	9.05417	0	198		113	146	88	152	111	109	119.833	9.05417	0	198		5	1	229	1	59	9.05417	0	198		1	130	142	1
9.055	190	1	1526	2968	1883	1	1	1	1	4380	4322	1508.4		2073	1580	604	2669	1	1	1	989.857	9.055	0	190		3487	1448	1992	3879	1	2495	2217	9.055	0	190		590	1	1	1	148.25	9.055	0	190		3317	1351	1515	1
9.05583	72	1	6799	8172	5063	1	1	6976	1	7863	6006	4088.3		4817	1	1	6177	1	1	1	1571.29	9.05583	0	72		8737	3520	5416	8147	1	6542	5393.83	9.05583	0	72		1	1	1	1	1	9.05583	-4087.3	72		7919	4203	1354	1
9.05667	407	1	1	1	1	1	1	12	1	1	1	2.1		1	1	1	1	1	1	1	1	9.05667	0	407		1	1	1	1	1	1	1	9.05667	0	407		1	1	1	1	1	9.05667	0	407		1	1	1	1
9.0575	108	1	254	260	164	116	190	304	255	222	226	199.2		158	249	1	1	1	421	36	123.857	9.0575	0	108		196	260	157	294	216	204	221.167	9.0575	0	108		52	1	492	226	192.75	9.0575	0	108		1	232	260	98
9.05917	66	1	1	1	1	1	1	1	1	1	1	1		1	1	1	1	5883	1	11210	2442.57	9.05917	0	66		1	1	1	2199	1	1147	558.333	9.05917	0	66		1	1	7685	1	1922	9.05917	0	66		1	1	1	1
9.06083	163	1	1	899	594	546	830	979	956	802	818	642.6		565	802	18	1	1	1350	80	402.429	9.06083	0	163		816	996	739	1003	853	758	860.833	9.06083	0	163		1	1	1674	975	662.75	9.06083	0	163		1	1031	1032	1
9.06167	207	1	1	9494	7567	6115	8484	10780	9402	8489	7757	6809		6232	8538	1	1	1	14118	1	4127.43	9.06167	0	207		8253	15292	8152	10490	8640	7684	9751.83	9.06167	0	207		1	1	18262	11161	7356.25	9.06167	0	207		1	12183	11826	2433
9.0625	159	1	1	544	783	379	470	558	623	443	509	431.1		372	601	78	1	1	731	166	278.571	9.0625	0	159		590	481	519	769	432	478	544.833	9.0625	0	159		749	1	868	517	533.75	9.0625	0	159		970	478	501	121
9.06333	295	1	1	1	1	1	101	1	42	1	50	20		1	83	1	1	1	174	39	42.8571	9.06333	0	295		15	554	17	181	380	10	192.833	9.06333	172.833	295		255	1	1	1	64.5	9.06333	0	295		42	78	485	1
9.06417	65	1	1	744	648	220	1	646	629	583	131	360.4		12	198	1	171	1	419	280	154.571	9.06417	0	65		737	1	191	729	256	466	396.667	9.06417	0	65		607	164	1056	493	580	9.06417	0	65		1	301	312	831
9.065	172	1	1	78	97	1	63	82	125	7	1	45.6		6	45	1	83	1	198	1	47.8571	9.065	0	172		78	91	67	153	75	86	91.6667	9.065	0	172		1	1	127	1	32.5	9.065	0	172		81	87	72	1
9.06583	209	1	1	3247	2333	1930	2846	3625	3299	2905	2752	2293.9		2014	2851	1	1	1	4900	1	1395.57	9.06583	0	209		2613	4569	2749	3491	3037	2684	3190.5	9.06583	0	209		5712	1	6393	3544	3912.5	9.06583	0	209		5167	3802	3679	392
9.06667	442	1	1	1	1	1	1	1	1	1	1	1		1	1	1	1	1	1	1	1	9.06667	#DIV/0!	442		1	1	1	1	1	1	1	9.06667	#DIV/0!	442		1	8	1	1	2.75	9.06667	0	442		1	1	1	1
9.0675	144	374	410	1	1	1	536	1	1	1	277	160.3		1	1	1	629	1	1	1	90.7143	9.0675	0	144		500	387	398	445	1	1	288.667	9.0675	0	144		137	4	1	1	35.75	9.0675	0	144		1	397	1	510
9.06833	170	1093	2658	2053	678	114	2043	2531	2365	2207	3104	1884.6		42	1658	1028	1073	1	4394	1	1171	9.06833	0	170		114	2283	1	1717	541	1	776.167	9.06833	-1108.43	170		1	40	2575	1	654.25	9.06833	0	170		278	464	648	2015
9.06917	146	47	45	1	1	279	1	1	721	508	774	237.8		491	356	1	1	1	1	1	121.714	9.06917	0	146		445	1528	1	446	389	332	523.5	9.06917	0	146		1	1	914	1	229.25	9.06917	0	146		1	700	467	1
9.07083	204	1	145	98	1	1	83	1	107	99	173	70.9		1	93	51	76	1	186	8	59.4286	9.07083	0	204		29	98	1	1	1	1	21.8333	9.07083	0	204		1	1	80	5	21.75	9.07083	0	204		1	1	1	1
9.07167	81	260	285	277	92	382	1	1	1	1	1	130.1		1	1	24	328	2883	18	1	465.143	9.07167	0	81		393	31	1	1	1	1	71.3333	9.07167	0	81		2676	1744	1	2015	1609	9.07167	1478.9	81		3519	1	1	469
9.0725	371	1	1	1	1	1	1	1	1	1	1	1		1	1	1	1	1	1	1	1	9.0725	#DIV/0!	371		1	1	1	1	1	1	1	9.0725	#DIV/0!	371		1	1	1	1	1	9.0725	#DIV/0!	371		1	1	1	1
9.07333	160	1	1	1	1	850	87	1	1	1	839	178.3		1	1	1	1	882	23	1	130	9.07333	0	160		1	1	1	1	1	1	1	9.07333	0	160		1274	114	97	739	556	9.07333	0	160		1142	1	1	1163
9.075	100	1	1	1	1	3271	1	4924	1	1	4400	1260.2		2526	1	29	1	6362	1	1	1274.43	9.075	0	100		1	1	1	1	3811	1	636	9.075	0	100		7184	1	1	4551	2934.25	9.075	0	100		7067	4877	1	1
9.07583	176	1	1	1	1	423	117	861	101	1	684	219.1		454	1	24	158	1027	1	1	238	9.07583	0	176		105	1	1	17	723	1	141.333	9.07583	0	176		1346	1	81	738	541.5	9.07583	0	176		1147	1	1	1
9.07667	158	1	1	98	146	161	1	306	309	228	341	159.2		181	385	1	1	241	1	1	115.857	9.07667	0	158		199	270	206	1	215	201	182	9.07667	0	158		480	1	438	173	273	9.07667	0	158		495	280	257	1
9.0775	281	1	1	1	1	39	1	22	1	21	1	8.9		21	1	1	1	1	1	1	3.85714	9.0775	0	281		1	1	1	23	21	14	10.1667	9.0775	0	281		1	1	59	1	15.5	9.0775	0	281		105	1	33	56
9.07833	157	861	1	969	1543	787	1	1921	1291	988	1627	998.9		822	2090	547	1	1192	1	602	750.714	9.07833	0	157		933	902	1	958	730	738	710.333	9.07833	0	157		1501	1	1	1	376	9.07833	0	157		2281	1	819	246
9.07917	481	1	1	1	1	1	1	1	1	1	1	1		1	14	1	1	1	1	1	2.85714	9.07917	0	481		1	1	1	1	1	1	1	9.07917	#DIV/0!	481		1	1	1	1	1	9.07917	#DIV/0!	481		46	1	1	2
9.08	79	75572	1	1	4868	25659	1	1	1	1	19140	12524.5		10930	80983	25127	16579	8573	46521	1	26959.1	9.08	0	79		2218	1	20277	1	1	1	3749.83	9.08	0	79		7656	4523	1	1	3045.25	9.08	0	79		6856	1	1	1
9.08083	557	1	1	1	1	1	1	1	1	1	1	1		1	1	1	1	1	1	1	1	9.08083	#DIV/0!	557		1	1	1	38	1	1	7.16667	9.08083	0	557		1	1	1	1	1	9.08083	#DIV/0!	557		1	1	1	1
9.08167	129	100	1	149	28	975	71	1	243	1	1	157		1	1	1	153	514	1	9	97.1429	9.08167	0	129		185	1	1	1	1	1	31.6667	9.08167	0	129		514	289	10	1	203.5	9.08167	0	129		1	1	1	1658
9.0825	218	1	58	57	1	1	47	1	1	57	1	22.5		1	1	93	99	1	1	141	48.1429	9.0825	0	218		1	38	112	1	56	1	34.8333	9.0825	0	218		1	21	1	1	6	9.0825	0	218		1	1	46	100
9.08333	367	1	1	1	1	1	1	1	1	1	1	1		1	1	1	1	1	1	1	1	9.08333	#DIV/0!	367		1	1	1	1	1	1	1	9.08333	#DIV/0!	367		1	1	1	1	1	9.08333	#DIV/0!	367		27	1	1	1
9.08417	135	159	22	139	1	1	1	1	1	1	1	32.7		1	1	1	1	4930	1	68	714.714	9.08417	0	135		1	1	1	1	1	1	1	9.08417	0	135		5785	3010	1	3542	3084.5	9.08417	3051.8	135		5368	1	1	1
9.085	66	1	1	637	1692	1	1	1	1	4185	1	652.1		1518	1	1	276	1	1	1	257	9.085	0	66		1	1045	1	1	1	1	175	9.085	0	66		3531	550	1	1	1020.75	9.085	0	66		3087	1	1	1
9.08583	61	520	33	1	1	1	1	1	401	1	1	96.1		155	371	1	1	5982	1	124	947.857	9.08583	0	61		1	131	1	1	1	1	22.6667	9.08583	0	61		5750	3297	1	4214	3315.5	9.08583	3219.4	61		7459	1	1	3504
9.08667	60	84	1	20	1	3161	1	818	218	1	1	430.6		1	114	1	1	2043	1	1	308.857	9.08667	0	60		1	1	1	1	1	1	1	9.08667	0	60		1700	889	1	1545	1033.75	9.08667	0	60		1	1	1	5379
9.0875	105	1	1	1	1	1	1	1	1	1	1	1		1	1	1	1	34887	1	476	5052.57	9.0875	0	105		1	1	1	1	1	1	1	9.0875	#DIV/0!	105		40360	21204	1	25476	21760.2	9.0875	21759.2	105		39439	1	1	2541
9.08833	71	1	1	1	1	9416	1	1	1	1	1	942.5		1	1	1	1	2853	12	1	410	9.08833	0	71		1	319	1	1	1	1	54	9.08833	0	71		2602	1457	1199	1	1314.75	9.08833	0	71		1	1	1	18989
9.08917	73	1	1	14374	1	1	1	1	12318	1	1	2670		1	1	1	1	146141	1	1	20878.1	9.08917	0	73		1	1	1	1	1	1	1	9.08917	0	73		1	76380	1	103406	44947	9.08917	42277	73		164311	1	1	96234
9.09	69	1	206	1	1	5181	1	1	1	1	5033	1042.7		4384	1	448	840	12049	1	156	2554.14	9.09	0	69		1	1	1	1	5062	1	844.5	9.09	0	69		9059	5641	1	7160	5465.25	9.09	4422.55	69		14151	1	1	2449
9.09083	120	1	1	1	620	1322	1	2273	1	1	2991	721.2		1281	1	1	904	3710	1	1	842.714	9.09083	0	120		1113	1	955	1337	1936	1045	1064.5	9.09083	0	120		5390	2123	1	1	1878.75	9.09083	0	120		3813	1	1	339
9.09167	174	1	1	1	1	408	1	1	1	1	683	109.9		488	1	1	1	1013	1	1	215.143	9.09167	0	174		1	1	1	1	750	1	125.833	9.09167	0	174		1512	1	346	706	641.25	9.09167	531.35	174		1128	3974	1	1
9.0925	78	213	1	624	1	3885	204	4825	1	1	3507	1326.2		2780	1	510	266	6559	1	1	1445.43	9.0925	0	78		1	1	127	1	2259	1	398.333	9.0925	0	78		5887	3180	1	4156	3306	9.0925	0	78		8628	175	1	1
9.09333	144	1	1	516	193	409	1	731	565	793	845	405.5		388	826	1	1	331	537	1	297.857	9.09333	0	144		1	1	1	1	616	276	149.333	9.09333	0	144		1523	340	1	371	558.75	9.09333	0	144		331	1	587	1
9.09417	147	15184	9243	1	16580	1	12800	1	1	37720	59261	15079.2		30677	1	22143	1	1	1	1	7546.43	9.09417	0	147		43414	31607	1	26258	1	30572	21975.5	9.09417	0	147		44991	8528	1	1	13380.2	9.09417	0	147		38213	9282	1	29177
9.095	153	1128	1391	1356	1	2241	1202	3422	1	1	2531	1327.4		1924	1423	1652	1	3849	1018	1124	1570.14	9.095	0	153		1	1	1	1	2408	1	402.167	9.095	0	153		3922	2270	1565	2872	2657.25	9.095	0	153		5903	792	1090	1
9.09583	148	1436	3576	1	1	4195	1	2101	1	6563	9452	2732.7		5352	2392	1	2741	8316	1	7241	3720.57	9.09583	0	148		1	1	750	579	1869	968	694.667	9.09583	0	148		8331	1	1	2253	2646.5	9.09583	0	148		8142	2333	1	1
9.09667	149	936	839	1	1	1661	2285	1	2584	3569	2929	1480.6		2096	1	291	1	3116	5146	1	1521.71	9.09667	0	149		591	2842	464	1	695	415	834.667	9.09667	0	149		1	1	1	589	148	9.09667	0	149		71	646	1	1
9.0975	67	1	196	260	1	1	1	11	241	43	422	117.7		13	1	1	1	674	17	16	103.286	9.0975	0	67		1	1	110	280	80	1	78.8333	9.0975	0	67		455	1	246	230	233	9.0975	0	67		1	173	1	526
9.09833	93	1	441	1	1	1	1	1	1	1	8	45.7		1	1	1	1	1050	1	1	150.857	9.09833	0	93		420	1	1	863	1	1	214.5	9.09833	0	93		1	1	27	1	7.5	9.09833	0	93		940	1	1	1
9.09917	143	1	679	500	1	1	622	796	556	583	904	464.3		123	646	1	82	257	1258	226	370.429	9.09917	0	143		13	687	1	13	97	110	153.5	9.09917	0	143		65	36	634	154	222.25	9.09917	0	143		422	253	159	1
9.1	146	5	1	1	1	1	1	1	1	1	348	36.1		1	1	1	1	525	1	1	75.8571	9.1	0	146		1	801	1	1	1	1	134.333	9.1	0	146		1063	302	14	322	425.25	9.1	389.15	146		652	1	1	400
9.10083	91	50	1	1	171	1	1	1	1	1	1	22.9		1	46	1	1	2876	1	1	418.143	9.10083	0	91		1	20	1	1	1	1	4.16667	9.10083	0	91		3354	1730	460	2118	1915.5	9.10083	1892.6	91		3611	1	1	2701
9.10167	207	1	1	1	1	1	1	1	1	1	1	1		1	5549	1	432	15716	1925	1	3375	9.10167	0	207		1	1	1	1	1	1	1	9.10167	#DIV/0!	207		15482	1	1	1	3871.25	9.10167	0	207		15457	1	1	1
9.10333	134	141	1	179	1	1	139	1	1	93	1	55.8		1	96	1	1	2709	1	1	401.429	9.10333	0	134		1	1	1	1	1	1	1	9.10333	0	134		3287	1	142	1943	1343.25	9.10333	1287.45	134		3013	13	1	394
9.10417	429	1	1	1	1	1	1	1	1	1	1	1		1	1	1	1	1	1	1	1	9.10417	#DIV/0!	429		1	1	1	1	1	1	1	9.10417	#DIV/0!	429		1	1	1	1	1	9.10417	#DIV/0!	429		1	1	1	1
9.105	75	585	1	1	3248	527	1	1	1	1	105	447.1		1	1	621	1	17132	1	1	2536.86	9.105	0	75		1	1	1407	1405	1	1	469.333	9.105	0	75		16079	9116	1040	11348	9395.75	9.105	8948.65	75		24847	1	1	11306
9.10583	97	35	1	1	32	1	1	1	1	1	1	7.5		1	1	1	1	5581	1	1	798.143	9.10583	0	97		1	1	1	1	1	1	1	9.10583	0	97		6729	3512	16	4080	3584.25	9.10583	3576.75	97		6101	1	1	1
9.10667	207	8572	3777	8575	14860	6697	1462	1	5607	4308	3956	5781.5		4037	1	11425	12203	1	1	693	4051.57	9.10667	0	207		1	1	8538	9942	1	5194	3946.17	9.10667	0	207		1	10403	1	1	2601.5	9.10667	0	207		19158	1	1	1818
9.1075	151	61	1	1	1	1	1	1	1	1	1	7		1	1	15	224	15284	1	1	2218.14	9.1075	0	151		1	1306	1	1	1	1	218.5	9.1075	0	151		18275	1	1	11170	7361.75	9.1075	7354.75	151		16386	1	177	1
9.10833	150	1	1	118	1	117	62	63	208	71	170	81.2		71	143	1	28	619	11	1	124.857	9.10833	0	150		92	1	1	152	1	1	41.3333	9.10833	0	150		687	412	87	65	312.75	9.10833	231.55	150		779	67	1	1
9.10917	155	66	534	1	1	1	1	1	964	735	1	230.5		1	602	1	882	16913	1	635	2719.29	9.10917	0	155		1	1	1	1	1	1	1	9.10917	0	155		18985	10339	1	12320	10411.2	9.10917	10180.8	155		19276	1	1	1
9.11	258	1	1	1	38	33	25	1	1	1	1	10.3		17	1	1	1	1	1	34	8	9.11	0	258		1	1	53	1	1	32	14.8333	9.11	0	258		109	1	1	33	36	9.11	0	258		1	1	1	1
9.11083	74	2165	1	1023	1	1	1	1	1	1	1	319.6		1	1	1	1	13557	1	1	1937.57	9.11083	0	74		1	1	1	1	1	1	1	9.11083	0	74		13496	6228	1	9152	7219.25	9.11083	6899.65	74		17010	1	1	14283
9.11167	321	1	1	1	1	327	1	632	1	1	479	144.5		349	1	1	1	813	1	1	166.714	9.11167	0	321		1	1	1	1	557	1	93.6667	9.11167	0	321		1146	508	1	582	559.25	9.11167	414.75	321		896	1	1	1
9.1125	106	1	1	1	1	1	9	1	1	1	1	1.8		1	57	91	1	4683	1	1	690.714	9.1125	0	106		99	1	1	1	1	1	17.3333	9.1125	0	106		5710	3060	1	3291	3015.5	9.1125	3013.7	106		5450	1	1	1
9.11333	77	1	1	1	2658	1	1	1	1	1	1	266.7		1	1	1	1	1	1	377	54.7143	9.11333	0	77		1	1	1	1	1	1	1	9.11333	0	77		1	36467	1	1	9117.5	9.11333	0	77		1	1	1	1
9.11417	107	1	45	1	1	171	154	1	125	111	1	61.1		99	130	1	1	2814	1	1	435.286	9.11417	0	107		1	14	1	1	1	1	3.16667	9.11417	0	107		3256	1745	142	1760	1725.75	9.11417	1664.65	107		3251	1	1	1
9.115	98	1	1	1	1	1	1	1	1	1	1	1		48	1	1	1	2542	1	1	370.714	9.115	0	98		12	1	1	1	1	1	2.83333	9.115	0	98		3071	1514	1	1832	1604.5	9.115	1603.5	98		2869	1	1	346
9.11583	87	1	1	1	1	1	1	1	505	71	467	105		362	1	78	1	6247	1	1	955.857	9.11583	0	87		1	1	340	1	254	1	99.6667	9.11583	0	87		6613	3606	1	4207	3606.75	9.11583	3501.75	87		7702	1	1	552
9.11667	178	1	130	162	1	1	1	1	178	1	1	47.7		1	76	1	152	9371	64	127	1398.86	9.11667	0	178		1	1	1	1	80	1	14.1667	9.11667	0	178		11292	5892	179	6754	6029.25	9.11667	5981.55	178		10030	1	1	16
9.1175	189	1	1	103	1	1	1	1	87	1	1	19.8		1	1	1	1	2670	1	1	382.286	9.1175	0	189		1	1	1	1	1	1	1	9.1175	0	189		3496	1685	1	1943	1781.25	9.1175	1761.45	189		2788	1	1	17
9.11833	95	1	201	1	237	1	1	1	1	1	1	44.6		68	1	1	1	1	1	1	10.5714	9.11833	0	95		1	1	125	1	1	1	21.6667	9.11833	0	95		1	1	1	1	1	9.11833	0	95		1	1	1	1
9.11917	261	1	22	1	1	1	21	1	1	1	1	5.1		1	1	1	30	14	1	1	7	9.11917	0	261		37	17	1	1	1	1	9.66667	9.11917	0	261		30	29	1	1	15.25	9.11917	0	261		1	1	1	1
9.12	66	1	1	1	1	1	1	1	1245	1	1	125.4		130	1	1	1	1	1	1	19.4286	9.12	0	66		1	2156	1	1	247	1	401.167	9.12	0	66		3310	1	1	1	828.25	9.12	0	66		1	1	1	1
9.12083	401	1	1	1	1	13	1	1	1	1	1	2.2		1	1	1	1	1	1	1	1	9.12083	0	401		1	1	1	1	1	1	1	9.12083	0	401		1	1	1	1	1	9.12083	0	401		1	1	1	1
9.12167	122	29	1	1	33	1	1	1	1	119	1	18.8		9	1	1	129	229	6	1	53.7143	9.12167	0	122		1	1	1	1	1	64	11.5	9.12167	0	122		158	1	1	1	40.25	9.12167	0	122		131	52	1	14
9.12333	131	1	1	1	1	105	1	1	1	1	1	11.4		1	1	1	1	1	1	1	1	9.12333	0	131		3741	1	1152	576	1	1	912	9.12333	0	131		319	1	1	106	106.75	9.12333	0	131		1	1	1	1218
9.12417	174	1	1	1	1	1	2036	1	1	1	1	204.5		1	1	1	1	1	1	1	1	9.12417	0	174		1	2767	1	1	1370	1	690.167	9.12417	0	174		1	805	780	1	396.75	9.12417	0	174		1	1	1363	1
9.125	127	1	10	1	1	1	1	69	1	1	6	9.2		1	1	1	1	1	85	1	13	9.125	0	127		1	1	1	1	1	1	1	9.125	0	127		1	541	1	1	136	9.125	0	127		1	111	60	1
9.12583	89	3284	1	1	1	31492	1	3499	1	1	1	3828.2		1	1	1	1	6447	1	1	921.857	9.12583	0	89		1	3171	1	1754	1636	765	1221.33	9.12583	0	89		5068	3388	1	1	2114.5	9.12583	0	89		1	1	1248	71594
9.12667	99	1	1	1	1	1	1	1	1	1	1	1		60	65	1	1	1	1	1	18.5714	9.12667	0	99		1	457	1	1	263	1	120.667	9.12667	0	99		1	1	1	1	1	9.12667	#DIV/0!	99		1	1	142	1
9.1275	246	1	1	119	147	170	1	148	229	148	79	104.3		71	160	1	320	1	1	134	98.2857	9.1275	0	246		155	1	219	252	88	144	143.167	9.1275	0	246		61	1	290	125	119.25	9.1275	0	246		1	71	82	4
9.12833	68	21	37	87	1	932	105	1	1	22	81	128.8		578	1	159	1	787	37	66	232.714	9.12833	0	68		1	1	1	1	498	1	83.8333	9.12833	0	68		766	440	262	1	367.25	9.12833	0	68		1226	94	1	1528
9.12917	171	1	1	1	1	58	1	1	8	1	1	7.4		1	1	1	1	1	40	74	17	9.12917	0	171		62	1	1	1	133	100	49.6667	9.12917	42.2667	171		293	90	1	74	114.5	9.12917	107.1	171		1	1	1	1
9.13	296	1	101	238	410	163	1	1	118	121	76	123		89	1	251	332	248	1	1	131.857	9.13	0	296		1	1	209	277	1	148	106.167	9.13	0	296		1	1	1	1	1	9.13	0	296		502	1	1	1
9.13083	148	1	3132	1	2311	1	4090	1	4432	4609	7457	2603.5		2696	1024	1	1	1	7770	7528	2717.29	9.13083	0	148		4812	7526	1	1	129	869	2223	9.13083	0	148		1	2012	669	1	670.75	9.13083	0	148		384	1	1	1
9.1325	181	1	1	1	1	1	1	1	1	1	6	1.5		1	1	1	1	1	1	1	1	9.1325	0	181		1	1	1	1	1	1	1	9.1325	0	181		1	571	1	1	143.5	9.1325	0	181		1	1	1	1
9.13333	204	1	1	1	82	1	1	119	1	1	1	20.9		47	1	1	1	39	1	8	14	9.13333	0	204		69	6	65	65	1	79	47.5	9.13333	0	204		149	13	1	90	63.25	9.13333	0	204		1	1	1	51
9.13417	461	1	12	1	1	1	1	1	1	1	1	2.1		1	1	1	1	1	1	1	1	9.13417	0	461		1	1	1	1	1	1	1	9.13417	0	461		1	1	1	1	1	9.13417	0	461		1	1	1	1
9.135	288	1	1	113	97	114	1	103	201	107	42	78		61	125	1	198	1	1	1	55.4286	9.135	0	288		109	1	161	219	55	106	108.5	9.135	0	288		47	1	1	54	25.75	9.135	0	288		1	54	60	1
9.13583	95	17	81	1	1	129	1	1	1	1	1	23.4		1	1	1	1	1	1	76	11.7143	9.13583	0	95		72	1	1	19	100	48	40.1667	9.13583	0	95		1	81	1	19	25.5	9.13583	0	95		452	1	1	739
9.13667	151	1	1	1	202	185	8	1	398	1	1	79.9		106	1	1	1	1	1	127	34	9.13667	0	151		325	1217	223	347	211	143	411	9.13667	331.1	151		385	9574	154	1	2528.5	9.13667	0	151		1	1	1	246
9.13833	105	96	491	66	594	270	42	1	1	512	1	207.4		259	1	1	271	361	176	573	234.571	9.13833	0	105		485	1	530	459	242	211	321.333	9.13833	0	105		1	1	1	268	67.75	9.13833	0	105		1	199	82	712
9.13917	147	14161	7591	1	12547	1	1	1	1	1	1	3430.6		1	1	24014	1	1	71590	45016	20089.1	9.13917	0	147		43689	1	1	23816	8237	30923	17777.8	9.13917	14347.2	147		41580	10617	2676	1	13718.5	9.13917	0	147		11836	8870	1	26870
9.14	146	109	56	57	1	1	1	1	1	69	1	29.7		123	83	1	1	1	1	1	30.1429	9.14	0	146		15	848	1	40	1	7	152	9.14	0	146		1	1	130	67	49.75	9.14	0	146		1	251	1	260
9.14083	83	1	1	1	1	1	1	1	1	1	64	7.3		1	1	1	1	1	1	1	1	9.14083	0	83		1	1	1	1	1	1	1	9.14083	0	83		1	1	1	1	1	9.14083	0	83		184	1	1	1
9.14167	72	1	1	2200	391	1	1	1	1	1	1019	361.7		745	1	4232	740	1	1	1396	1016.57	9.14167	0	72		1	864	1102	744	1	1478	698.333	9.14167	0	72		256	789	1128	779	738	9.14167	0	72		2016	1	1	2486
9.1425	226	1	64	1	1	32	1	4	95	5	71	27.5		1	64	1	1	8606	1	46	1245.71	9.1425	0	226		95	1	15	118	5	6	40	9.1425	0	226		10519	5290	40	6189	5509.5	9.1425	5482	226		9264	1	35	1
9.14333	77	1	1	1	1	1	1	1	1	1	1	1		181	1	1	1236	1	1	545	280.857	9.14333	0	77		1	1	1	1	1	1	1	9.14333	#DIV/0!	77		5330	1	252	1	1396	9.14333	0	77		1	1	1551	2462
9.14417	76	1	90	1	446	318	1	175	1	26	91	115		127	1	1	1	1	1	1	19	9.14417	0	76		235	1	1	245	1	101	97.3333	9.14417	0	76		1	1	1	1	1	9.14417	0	76		409	1	90	83
9.145	78	1	19	1	1357	702	43	56	382	122	66	274.9		1	1	58	1	1	1	1	9.14286	9.145	0	78		1	1	1	1	1	96	16.8333	9.145	0	78		1	107	1	560	167.25	9.145	0	78		914	1	1	1
9.14583	223	1	1	1	1	1	1	1	1	1	1	1		1	1	1	1	1	1	1	1	9.14583	#DIV/0!	223		1	1	1	1	1	1	1	9.14583	#DIV/0!	223		7	1	1	1	2.5	9.14583	0	223		1	1	1	1
9.14667	219	1	1	16	1	22	1	1	33	1	1	7.8		1	1	1	1	62	1	1	9.71429	9.14667	0	219		1	1	24	1	1	28	9.33333	9.14667	0	219		53	39	1	33	31.5	9.14667	23.7	219		42	1	1	1
9.1475	311	1	1	1	1	1	1	1	1	17	1	2.6		1	19	1	1	1	1	1	3.57143	9.1475	0	311		1	1	1	1	1	1	1	9.1475	0	311		1	1	1	1	1	9.1475	0	311		1	1	1	1
9.14833	79	1	1	1	1303	22377	1	40797	1	1	1	6448.4		1	1	1	16387	708	1	1	2442.86	9.14833	0	79		1	1	22025	938	1	1	3827.83	9.14833	0	79		776	2384	1	1	790.5	9.14833	0	79		1	1	1	1
9.14917	281	1	13	1	1	1	1	1	1	1	1	2.2		1	1	1	1	25	1	1	4.42857	9.14917	0	281		1	1	1	51	17	1	12	9.14917	0	281		1	1	1	1	1	9.14917	0	281		1	1	20	45
9.15083	177	1	293	1	328	147	1	1	1	51	1	82.5		10	1	276	314	1	1	345	135.429	9.15083	0	177		187	961	205	207	891	119	428.333	9.15083	345.833	177		1	1	1	1	1	9.15083	0	177		430	1	1	46
9.1525	94	1	1	1	1	1	1	1	9	1	1	1.8		1	1	1	1	1	1	1	1	9.1525	0	94		1	110	1	1	103	1	36.1667	9.1525	0	94		1	1	1	1	1	9.1525	0	94		1	1	141	1
9.15333	143	1	1	1	1	1	1	1	1	692	1	70.1		1	1	1	1	1	1	1	1	9.15333	0	143		1	1	1	1	1	1	1	9.15333	0	143		1	371	1	1	93.5	9.15333	0	143		1	1	1	1
9.15417	294	1	1	1	1	1	1	1	1	1	1	1		1	1	1	1	1	1	1	1	9.15417	#DIV/0!	294		1	12	1	1	11	1	4.5	9.15417	0	294		1	1	1	1	1	9.15417	#DIV/0!	294		1	1	1	1
9.155	88	1	1	1	1	1	1	1	1	1	1	1		1	1	1	1	1	1	1	1	9.155	#DIV/0!	88		1	1	1	1	1	1	1	9.155	#DIV/0!	88		1	1	1	1	1	9.155	#DIV/0!	88		1	1	1	1
9.15583	257	1	1	1	1	1	1	1	1	1	1	1		1	1	1	1	1	1	18	3.42857	9.15583	0	257		1	1	23	1	1	1	4.66667	9.15583	0	257		18	1	1	1	5.25	9.15583	0	257		1	1	22	1
9.15667	578	1	1	1	1	1	1	1	1	15	1	2.4		1	1	1	1	1	1	1	1	9.15667	0	578		1	1	1	1	1	1	1	9.15667	0	578		1	1	1	1	1	9.15667	0	578		1	1	1	1
9.1575	85	1	1	1	1	14	1	1	1	1	1	2.3		1	1	255	1	1	1	760	145.714	9.1575	0	85		1	1	21	1	111	1	22.6667	9.1575	0	85		1	38	1	1	10.25	9.1575	0	85		450	1	1	1
9.15917	147	1	1	1	1	1	9664	1	1	1	1	967.3		1	1	1	1	1	74413	1	10631.3	9.15917	0	147		1	1	1	1	1	1	1	9.15917	0	147		1	1	1	1	1	9.15917	0	147		1	1	1	1
9.16	171	1	1	1	1	1	1	1	1	1	4	1.3		1	1	1	1	125	1	1	18.7143	9.16	0	171		1	69	1	1	81	1	25.6667	9.16	0	171		313	42	1	1	89.25	9.16	0	171		1	166	73	1
9.16083	170	1	201	1	1	1	241	1	1	1	1	45		609	1	1	1	2208	1	1	403.143	9.16083	0	170		1	469	1	135	1	1	101.333	9.16083	0	170		3772	781	1	1	1138.75	9.16083	0	170		408	2272	1520	542
9.16167	247	1	1	1	1	79	1	1	1	62	1	14.9		44	1	83	174	1	1	138	63.1429	9.16167	0	247		133	408	124	193	389	84	221.833	9.16167	206.933	247		1	1	592	3	149.25	9.16167	0	247		1	681	460	1
9.1625	204	1	1	1	1	6	1	1	1	1	1	1.5		1	1	1	1	115	1	1	17.2857	9.1625	0	204		1	1	1	1	34	9	7.83333	9.1625	0	204		185	38	1	1	56.25	9.1625	0	204		1	89	47	1
9.16333	263	1	1	35	53	5	1	1	1	21	1	12		21	1	1	63	1	1	43	18.7143	9.16333	0	263		40	107	38	56	42	30	52.1667	9.16333	40.1667	263		29	33	1	1	16	9.16333	0	263		96	1	1	1
9.16417	112	1	1	1	1	1	1	1	1	1	1	1		1	1	1	1	1	1	1	1	9.16417	#DIV/0!	112		1	1	1	1	1	1	1	9.16417	#DIV/0!	112		61	34	1	1	24.25	9.16417	23.25	112		1	1	1	1
9.165	179	1	1	1	1	79	1	1	1	1	1	8.8		1	1	1	1	15	226	1	35.1429	9.165	0	179		1	176	1	1	110	1	48.3333	9.165	0	179		50	1	243	1	73.75	9.165	0	179		1	324	199	1
9.16667	66	1	1	1	1	1022	1	1	1	3228	1	425.8		1	1	5640	814	1	1	11398	2550.86	9.16667	0	66		1	2808	974	998	1	1	797.167	9.16667	0	66		1	502	1	1	126.25	9.16667	0	66		1	1	1	1
9.1675	93	1	1	1	1	1	1	1	1	1	1	1		1	1	1	1	1	1	171	25.2857	9.1675	0	93		1	1	1	1	1	1	1	9.1675	#DIV/0!	93		1	95	1	1	24.5	9.1675	0	93		1	1	1	1
9.16833	278	1	1	1	1	1	1	1	1	1	1	1		1	1	1	1	15	1	1	3	9.16833	0	278		1	1	1	1	1	1	1	9.16833	#DIV/0!	278		1	1	1	1	1	9.16833	#DIV/0!	278		1	1	1	1
9.16917	229	1	6	6	1	40	1	1	1	1	1	5.9		1	1	1	10	214	1	6	33.4286	9.16917	0	229		1	1	1	13	1	1	3	9.16917	0	229		1	1	1	200	50.75	9.16917	0	229		359	1	1	15
9.17	421	1	1	1	1	1	1	1	1	1	1	1		1	1	1	1	1	1	1	1	9.17	#DIV/0!	421		1	1	1	1	1	1	1	9.17	#DIV/0!	421		1	1	1	1	1	9.17	#DIV/0!	421		1	1	1	1
9.17083	154	1	1	1	1	63	1	91	44	1	1	20.5		1	1	1	1	104	1	1	15.7143	9.17083	0	154		1	1	1	1	1	1	1	9.17083	0	154		1	1	1	1	1	9.17083	0	154		1	1	1	1
9.17167	318	1	1	76	16	197	1	111	1	109	237	75		146	1	1	12	259	1	87	72.4286	9.17167	0	318		269	1	247	167	1	165	141.667	9.17167	0	318		1	133	1	260	98.75	9.17167	0	318		1	81	69	55
9.1725	137	1	1	1	1	1	45	178	87	80	1	39.6		1	31	1	1	1	1	219	36.4286	9.1725	0	137		1	1	1	1	1	1	1	9.1725	0	137		1	1	63	1	16.5	9.1725	0	137		1	1	1	1
9.17333	467	1	10	1	1	1	1	12	1	1	1	3		1	1	1	1	1	1	1	1	9.17333	0	467		1	1	1	1	1	1	1	9.17333	0	467		1	1	1	1	1	9.17333	0	467		1	1	1	1
9.17417	267	1	1	1	1	1	1	11	42	1	12	7.2		1	48	1	1	1	1	1	7.71429	9.17417	0	267		1	26	1	1	4	1	5.66667	9.17417	0	267		1	1	1	1	1	9.17417	0	267		1	53	30	1
9.175	211	1	1	1	1	1	1	1	1	1	1	1		15	1	1	1	1	1	1	3	9.175	0	211		9	81	1	1	99	1	32	9.175	31	211		1	36	1	1	9.75	9.175	0	211		1	1	113	1
9.17583	120	1	1	1	1	880	1	1	1	1	1	88.9		256	1	1	223	2144	1	1	375.286	9.17583	0	120		1	335	385	130	1079	1	321.833	9.17583	0	120		3849	681	1	1	1133	9.17583	0	120		859	1854	571	1
9.17667	91	3493	2736	1841	1	1	2965	6075	1	1515	2464	2109.2		1	1899	372	1	1	1576	1536	769.429	9.17667	0	91		1	1789	1	1	1014	1	467.833	9.17667	0	91		153	11	1	1	41.5	9.17667	0	91		1	7008	1034	403
9.1775	60	15218	11008	8120	1	1	11879	26818	4081	6500	9729	9335.5		2792	8469	1888	1	207	6374	6373	3729.14	9.1775	0	60		3958	5867	1	1	2465	3354	2607.67	9.1775	0	60		2839	7853	2231	5665	4647	9.1775	0	60		1	25870	4509	2175
9.17833	74	100277	70393	52297	1	384	79500	165741	1	43278	64487	57635.9		1	55943	12366	1	1	44283	41302	21985.3	9.17833	0	74		1	50599	1	1	26402	788	12965.3	9.17833	0	74		1	1	1	1	1	9.17833	0	74		1	184405	24287	14280
9.17917	75	37083	1	20131	1	1	31979	66254	13340	15192	24505	20848.7		1	22307	4529	1	1	18286	1	6446.57	9.17917	0	75		1	24905	1	1	13079	1	6331.33	9.17917	0	75		8697	903	13174	1	5693.75	9.17917	0	75		1	68761	14290	5065
9.18	73	285841	227914	1	1	6036	272303	1	1	3639	1	79573.8		2613	1	42239	1	1	184003	149570	54061.1	9.18	0	73		1	186904	1	13638	1	3669	34035.7	9.18	0	73		1	1	1	1	1	9.18	0	73		28646	609546	1	1
9.18083	214	1	81	67	1	47	82	79	88	69	73	58.8		42	67	1	82	113	110	48	66.1429	9.18083	0	214		83	79	66	127	68	65	81.3333	9.18083	0	214		135	74	129	64	100.5	9.18083	0	214		99	75	77	89
9.18167	111	1	1	1	444	1	98	140	108	207	1	100.2		1	114	1	280	1	1	136	76.2857	9.18167	0	111		322	174	434	1	51	101	180.5	9.18167	0	111		82	304	324	1	177.75	9.18167	0	111		170	1	185	175
9.1825	79	79114	1	1	1	1	1	46188	1	1	1	12531		1	80405	30208	1	1	47765	1	22626	9.1825	0	79		1	1	1	1	3754	1	626.5	9.1825	0	79		1	3361	1	1	841	9.1825	0	79		1	1	1	1
9.18333	281	1	1	1	1	1	109	135	107	1	81	43.8		1	96	103	1	170	1	1	53.2857	9.18333	0	281		1	427	1	1	61	1	82	9.18333	0	281		65	1	87	1	38.5	9.18333	0	281		1	124	72	1
9.18417	78	732	19	57	1	1	991	1114	113	81	432	354.1		49	1	336	1	505	1	367	180	9.18417	0	78		1	1	184	223	1	1	68.5	9.18417	0	78		183	1	1	1	46.5	9.18417	0	78		1	978	1	1745
9.185	178	1	1	1	1	1	1	1	1	1	1	1		1	1	1	1	173	225	1	57.5714	9.185	0	178		1	178	1	1	174	1	59.3333	9.185	0	178		1	1	275	1	69.5	9.185	0	178		1	364	234	1
9.18583	121	1	1	490	1	1	1055	1	948	1	7	250.6		1	1	1	1	1	1	1	1	9.18583	0	121		1	826	1	1	531	1	226.833	9.18583	0	121		397	118	1640	1	539	9.18583	0	121		1	517	560	1441
9.18667	164	1	1	1	1	1	1	1	1	1	1	1		1	1	1	1	1	224	25	36.2857	9.18667	0	164		1	149	1	1	189	1	57	9.18667	0	164		102	1	156	1	65	9.18667	64	164		1	223	197	1
9.1875	96	1	56	329	621	209	1	1	1	168	184	157.1		104	1	468	578	1	1	430	226.143	9.1875	0	96		304	1231	379	411	1425	170	653.333	9.1875	496.233	96		1	1	2387	1	597.5	9.1875	0	96		1133	2589	1938	1
9.18833	77	2841	849	1	1	1	2511	4864	1	1	1773	1284.3		1	1	1	1	1	1	1	1	9.18833	0	77		1	1662	53	1	1	1	286.5	9.18833	0	77		1	1	163	290	113.75	9.18833	0	77		786	1	305	1586
9.19	140	1	7	1	1	8	1	1	1	1	1	2.3		1	1	1	60	1	272	1	48.1429	9.19	0	140		65	201	1	59	161	8	82.5	9.19	80.2	140		1	1	237	1	60	9.19	0	140		1	364	217	1
9.19083	155	1	144	247	1	246	260	318	321	267	244	204.9		163	218	693	1	1054	1028	980	591	9.19083	386.1	155		1	625	350	474	1	217	278	9.19083	0	155		1	566	1538	1075	795	9.19083	590.1	155		814	986	1	1
9.19167	263	1	1	1	507	1	282	372	397	436	234	223.2		1	317	409	1	493	235	1	208.143	9.19167	0	263		1	172	493	1	197	1	144.167	9.19167	0	263		245	228	294	265	258	9.19167	0	263		638	348	217	1
9.1925	152	1	1	1	1	1	772	1	1	1	1	78.1		1	1	1396	1	934	1	1799	590.429	9.1925	0	152		1	679	1	1	1	1	114	9.1925	0	152		1	635	1	1	159.5	9.1925	0	152		1750	582	485	1815
9.19333	109	1	1	1	1	1	1	63	1	40	22	13.2		1	1	48	1	43	1	1	13.7143	9.19333	0	109		1	1	1	1	43	1	8	9.19333	0	109		28	59	1	55	35.75	9.19333	0	109		69	70	1	1
9.19417	505	1	1	1	1	1	1	1	1	1	1	1		1	19	1	1	1	1	1	3.57143	9.19417	0	505		1	1	1	1	1	1	1	9.19417	#DIV/0!	505		1	1	1	1	1	9.19417	#DIV/0!	505		1	1	1	1
9.195	93	1	1	1	168	1	1	1	1	1	1	17.7		1	1	25	1	1	1	1	4.42857	9.195	0	93		90	5655	1	1	25	1	962.167	9.195	0	93		1	143	1	1	36.5	9.195	0	93		1	1	25	1664
9.19583	147	1	1	1	1	1	1	32460	62230	31096	62368	18816		1	17028	1	12429	29603	79388	1	19778.7	9.19583	0	147		40929	24630	26074	1	8254	1	16648.2	9.19583	0	147		1	1	2840	1	710.75	9.19583	0	147		1	1	1	26247
9.19667	383	1	1	1	36	16	14	1	1	5	1	7.7		1	1	1	1	1	1	1	1	9.19667	0	383		1	1	1	1	1	1	1	9.19667	0	383		1	1	1	1	1	9.19667	0	383		1	1	1	1
9.1975	64	1	1	7	1	1	1	1	61	88	1	16.3		1	1	135	1	1	46	1	26.5714	9.1975	0	64		1	98	1	1	1	1	17.1667	9.1975	0	64		1	122	135	84	85.5	9.1975	69.2	64		1	216	1	1
9.19833	550	1	1	14	1	1	1	1	1	9	1	3.1		1	1	1	1	1	1	1	1	9.19833	0	550		1	1	1	1	1	1	1	9.19833	0	550		1	1	1	1	1	9.19833	0	550		40	1	1	1
9.19917	303	1	1	1	1	1	1	1	1	1	1	1		1	20	1	1	9	1	1	4.85714	9.19917	0	303		1	1	25	1	1	1	5	9.19917	0	303		1	1	1	1	1	9.19917	#DIV/0!	303		1	1	1	1
9.2	127	30	1	121	1	1	1	817	76	65	59	117.2		1	1	265	1	810	857	1	276.571	9.2	0	127		1	1	1	145	1	80	38.1667	9.2	0	127		1	313	1294	959	641.75	9.2	524.55	127		1	909	1	1
9.20083	190	120	202	1	493	1	442	801	361	371	330	312.2		1	333	441	1	422	289	160	235.286	9.20083	0	190		1	253	417	528	216	1	236	9.20083	0	190		223	320	94	300	234.25	9.20083	0	190		506	687	287	67
9.20167	91	1	1	1	602	748	1	1	1	1	1	135.8		577	1	1	1	1116	1	520	316.714	9.20167	0	91		804	1	511	586	1	702	434.167	9.20167	0	91		621	2088	478	1226	1103.25	9.20167	967.45	91		1	1	1	1
9.2025	104	443	1	1	478	1	442	651	369	9	367	276.2		1	372	1	1	371	317	1	152	9.2025	0	104		1	124	1	1	200	1	54.6667	9.2025	0	104		216	445	205	270	284	9.2025	0	104		1	680	256	288
9.20333	74	1	1	1	26682	23326	1	1	1	1	1	5001.6		1	1	15305	1	1	1	1	2187.29	9.20333	0	74		1	1	24875	26715	1	22368	12326.8	9.20333	0	74		21922	52843	16284	37332	32095.2	9.20333	27093.7	74		1	1	1	1
9.20417	116	1	1	1	1	1152	1	1	1	1	1	116.1		1	1	1378	1	1809	1	1	456	9.20417	0	116		1	1	1135	1278	1	1057	578.833	9.20417	0	116		1	3812	1	1	953.75	9.20417	0	116		2654	1	1	1
9.205	134	655	1	1	947	1	525	666	531	705	321	435.3		1	431	1214	1	768	416	1	404.571	9.205	0	134		1	251	843	1042	344	1	413.667	9.205	0	134		442	393	421	426	420.5	9.205	0	134		1020	659	356	68
9.20583	209	6304	1	144	9337	1	5436	6969	7110	7678	4569	4754.9		1	5625	9309	1	8998	4569	1	4072	9.20583	0	209		1	3676	9069	11275	3489	70	4596.67	9.20583	0	209		4704	4319	5450	4948	4855.25	9.20583	0	209		10965	6144	4360	802
9.20667	73	1	1	220846	169193	1	1	517299	155052	158985	191517	141290		1	193674	137680	1	202473	1	1	76261.6	9.20667	0	73		1	1	147428	197466	103346	1	74707.2	9.20667	0	73		1	213468	89734	176149	119838	9.20667	0	73		1	1	111955	54375
9.2075	191	7360	1	1	10512	1	6000	7801	8028	8514	5134	5335.2		1	6288	13489	1	10151	5213	1	5020.57	9.2075	0	191		1	4047	10106	12618	3909	1	5113.67	9.2075	0	191		5212	4789	6000	5507	5377	9.2075	0	191		12468	6878	4809	825
9.20833	247	246	1246	1283	996	770	587	752	785	856	488	800.9		1024	613	785	1346	964	479	1360	938.714	9.20833	0	247		982	53	976	1245	1	998	709.167	9.20833	0	247		506	472	1	521	375	9.20833	-425.9	247		1229	1	1	63
9.20917	135	489	1	1	579	1	396	1	517	437	282	270.4		1	325	1060	1	620	1	1	287	9.20917	0	135		1	1	543	1	1	1	91.3333	9.20917	0	135		273	327	1	293	223.5	9.20917	0	135		599	1	1	1
9.21083	131	1950	1	1	1635	1	1765	1102	1244	1892	902	1049.3		1	1	1982	1	1	1	1	284	9.21083	0	131		1	1	2751	1	1	1	459.333	9.21083	0	131		1	985	1508	1316	952.5	9.21083	0	131		2383	1813	1	1460
9.21167	147	19714	9647	1	8228	1	1	33343	1	31380	56073	15838.9		32984	16516	29093	17447	41296	78398	50029	37966.1	9.21167	22127.2	147		47569	61874	28376	1	12778	36692	31215	9.21167	0	147		1	8827	7837	1	4166.5	9.21167	0	147		19370	12610	1	63299
9.2125	148	2380	2213	1	1608	1	4658	329	4581	4349	8005	2812.5		1	1408	244	3092	5421	8667	1	2690.57	9.2125	0	148		4331	8256	1	1	232	1	2137	9.2125	0	148		1	280	1	1	70.75	9.2125	0	148		1	1316	1	1
9.21333	60	1	1	1	3515	3242	1	1	1	1	1	676.5		1	1	2041	1	1	1	1	292.429	9.21333	0	60		1	1	3057	1	1	1	510.333	9.21333	0	60		1	1	1	1	1	9.21333	0	60		1	1	1	1
9.21417	222	1	1	1	1	1	40	1	1	1	1	4.9		1	19	93	1	1	1	1	16.7143	9.21417	0	222		1	1	1	1	1	1	1	9.21417	0	222		1	1	1	1	1	9.21417	0	222		1	1	1	1
9.215	71	1	1	1	1518	1	1	1	1	1	1	152.7		1	1	1	4267	2063	1	1	905	9.215	0	71		1	1	1	2113	1	1	353	9.215	0	71		1	1	1	1	1	9.215	0	71		3086	1	1	1
9.21583	66	3985	1	1	634	1	811	1	1	1	608	604.4		1	1	1	1	6866	1	1	981.714	9.21583	0	66		9551	4348	2189	1	1	1	2681.83	9.21583	0	66		1	1	2368	1	592.75	9.21583	0	66		1	1	1	2076
9.21667	189	1	1	2766	2181	1	1	1	1	1908	1	686.2		1	1	1955	1	2324	1	1	612	9.21667	0	189		1	1	2045	2494	1	1	757.167	9.21667	0	189		1	2137	1	1761	975	9.21667	0	189		3010	1	1	1
9.2175	117	1	1	5567	1	1	1	1	4657	4071	1	1430.2		1	1	18191	1	5283	1	18586	6009.14	9.2175	0	117		1	1	1	1	1	1	1	9.2175	0	117		2927	5775	4112	4642	4364	9.2175	2933.8	117		6647	1	1	1
9.21833	203	1	1	552	420	321	224	325	306	351	200	270.1		425	212	377	558	422	200	582	396.571	9.21833	0	203		376	117	434	505	150	405	331.167	9.21833	0	203		183	185	228	235	207.75	9.21833	0	203		509	289	170	15
9.21917	267	1	1	1	1	1	31	1	1	1	1	4		70	1	815	1	1	1	1123	287.429	9.21917	0	267		1	1	64	1	1	60	21.3333	9.21917	0	267		1	7	1	1	2.5	9.21917	0	267		1	1	1	1
9.22	299	1	100	124	21	32	63	72	73	63	44	59.3		90	61	62	97	103	44	117	82	9.22	0	299		55	8	75	111	6	93	58	9.22	0	299		6	46	55	10	29.25	9.22	0	299		34	72	42	1
9.22083	108	34	1	1	1	1	1	1	1	1	1	4.3		10	1	1	1	1	1	42	8.14286	9.22083	0	108		1	1	38	1	1	1	7.16667	9.22083	0	108		1	1	1	1	1	9.22083	0	108		1	8	1	1
9.22167	122	51	45	32	1	1	67	40	1	1	1	24		1	1	1	118	1	75	10	29.5714	9.22167	0	122		1	7	1	1	1	38	8.16667	9.22167	0	122		1	101	1	1	26	9.22167	0	122		1	1	1	727
9.2225	337	1	1	1	1	1	1	1	1	1	1	1		1	21	1	1	1	1	1	3.85714	9.2225	0	337		1	1	1	1	8	1	2.16667	9.2225	0	337		1	1	1	4	1.75	9.2225	0	337		1	1	1	1
9.22333	123	1	1	1	1	1	1	1	1	1	6	1.5		1	1	1	1	1	1	1	1	9.22333	0	123		1	94	1	1	1	1	16.5	9.22333	0	123		1	90	1	1	23.25	9.22333	0	123		1	1	7	1
9.22417	141	1	1	1	1	1	108	1	1	1	103	21.9		1	1	124	1	185	1	1	44.8571	9.22417	0	141		1	105	1	163	105	1	62.6667	9.22417	0	141		37	98	233	165	133.25	9.22417	111.35	141		1	185	124	1
9.225	130	311	1	1	1	70	1	390	1	1	1	77.8		331	1	1	1	314	1	10	94.1429	9.225	0	130		1	1	80	87	1	222	65.3333	9.225	0	130		334	531	1	209	268.75	9.225	0	130		1	1	1	1
9.22583	143	281	345	211	1	302	1	1	9	150	1	130.2		1	194	1	82	1	77	393	107	9.22583	0	143		395	1	1	1	92	1	81.8333	9.22583	0	143		1	231	1	128	90.25	9.22583	0	143		675	1	110	246
9.22667	311	1	1	1	1	1	18	1	1	1	1	2.7		1	18	1	1	1	1	1	3.42857	9.22667	0	311		1	1	1	1	1	1	1	9.22667	0	311		1	1	1	1	1	9.22667	0	311		1	1	1	1
9.2275	170	1	1	122	128	1	680	701	710	669	462	347.5		1	757	125	67	456	654	71	304.429	9.2275	0	170		1	1	1	1	48	8	10	9.2275	-337.5	170		119	1897	78	1	523.75	9.2275	0	170		1290	1	117	364
9.22833	339	1	1	1	1	1	20	1	1	3	1	3.1		1	1	1	1	1	1	1	1	9.22833	0	339		1	1	1	1	1	1	1	9.22833	0	339		1	1	1	1	1	9.22833	0	339		1	1	1	1
9.22917	255	1	1	1	1	1	1	1	1	1	1	1		1	1	1	1	1	1	1	1	9.22917	#DIV/0!	255		1	1	9	1	1	1	2.33333	9.22917	0	255		1	1	1	1	1	9.22917	#DIV/0!	255		1	1	1	1
9.23	223	1	1	1	1	1	1	1	1	1	1	1		1	1	1737	1	1	1	2504	606.571	9.23	0	223		1	987	1	1	1152	22	360.667	9.23	0	223		1	1	1	1	1	9.23	#DIV/0!	223		1	1442	1	1
9.23083	254	1	2	10	1	1	7	1	1	1	1	2.6		1	1	1	1	259	14	1	39.7143	9.23083	0	254		1	1	1	1	1	1	1	9.23083	0	254		332	182	1	183	174.5	9.23083	171.9	254		321	1	1	9
9.23167	125	1	1	1	1	78	73	87	73	95	39	44.9		1	1	268	1	124	10	1	58	9.23167	0	125		1	1	1	145	38	1	31.1667	9.23167	0	125		6	64	14	73	39.25	9.23167	0	125		1	111	58	1
9.2325	116	2266	1546	848	1237	1	1	1	1	1	342	624.4		1	1158	872	1532	1674	767	2470	1210.57	9.2325	0	116		1514	977	1	1	264	1	459.667	9.2325	0	116		1	474	896	1	343	9.2325	0	116		2349	3155	1	2180
9.23417	172	1	62	34	1	40	64	85	58	64	1	41		1	73	608	1	84	73	537	196.714	9.23417	0	172		1	158	1	1	49	1	35.1667	9.23417	0	172		1	98	1	71	42.75	9.23417	0	172		224	123	47	1
9.235	314	1	1	1	1	1	16	1	1	1	1	2.5		1	1	1	1	1	1	1	1	9.235	0	314		1	1	1	1	1	1	1	9.235	0	314		3	1	1	1	1.5	9.235	0	314		1	1	1	18
9.23583	111	1	1	81	210	116	161	145	68	48	6	83.7		55	88	1	1	115	1	1	37.4286	9.23583	0	111		1	1	266	245	1	1	85.8333	9.23583	0	111		1	1	129	1	33	9.23583	0	111		28	1	72	85
9.23667	152	695	1402	1206	1282	1157	862	1022	982	958	817	1038.3		1018	1324	812	1276	1723	1364	1	1074	9.23667	0	152		1319	585	1066	1318	757	1201	1041	9.23667	0	152		1196	835	1015	1067	1028.25	9.23667	0	152		1787	953	846	2203
9.2375	89	1	1	1	15318	1	1	1	1832	1	196	1735.3		1	1	1	10300	23060	1	1	4766.43	9.2375	0	89		1	1	1	14463	1	1	2411.33	9.2375	0	89		2572	1	1	1	643.75	9.2375	0	89		37058	1	1	5645
9.23833	151	2427	5644	4335	3201	2953	3443	3826	3027	3294	1952	3410.2		3858	4489	1	4130	7363	3883	1	3389.29	9.23833	0	151		3374	5541	4159	4218	2969	4628	4148.17	9.23833	0	151		4393	3188	3887	4290	3939.5	9.23833	0	151		5800	4233	3457	5889
9.23917	166	1270	3797	2772	2020	1883	2217	2428	1887	2027	1253	2155.4		2493	2775	55	2666	4507	2608	75	2168.43	9.23917	0	166		2066	2304	2706	2616	1788	2983	2410.5	9.23917	0	166		2718	1906	2260	2639	2380.75	9.23917	0	166		3807	2684	2120	3810
9.24	71	1111	2582	1635	1	1047	3159	2442	1016	1509	698	1520		1217	2112	1	1	2452	1621	2303	1386.71	9.24	0	71		1458	1	4466	3108	823	1	1642.83	9.24	0	71		549	1	3371	1842	1440.75	9.24	0	71		4015	5249	873	5511
9.24083	69	698	888	956	727	314	1054	1	641	771	1	605.1		888	610	297	1322	2148	1222	1	926.857	9.24083	0	69		759	1	1332	998	520	894	750.667	9.24083	0	69		399	725	1	1575	675	9.24083	0	69		3935	2452	704	1
9.24167	117	26160	23437	23760	28177	9886	16240	17034	21383	14582	13288	19394.7		9961	25380	29218	26266	18034	20377	1	18462.4	9.24167	0	117		15202	47545	15075	19282	13340	9282	19954.3	9.24167	0	117		5696	8322	31534	13611	14790.8	9.24167	0	117		28542	19194	16329	31230
9.2425	77	7012	6402	6674	6685	4215	5095	6368	5768	4423	3345	5598.7		4822	6628	1141	7993	7894	5222	1	4814.43	9.2425	0	77		6073	4198	6321	6463	1	5518	4762.33	9.2425	0	77		2526	2522	4685	4813	3636.5	9.2425	-1962.2	77		8541	1	3451	9116
9.24333	174	1	1	1	14641	20524	1	1	1	1	1	3517.3		15258	1	1	10247	25820	1	1	7332.71	9.24333	0	174		23298	1	14021	13825	1	19813	11826.5	9.24333	0	174		17879	48364	12639	29753	27158.8	9.24333	23641.5	174		41537	1	1	1
9.24417	73	1	202642	1	1	134712	1	1	58501	1	1	39586.2		149298	1	34355	199214	95851	54068	223625	108059	9.24417	0	73		141919	115476	1	1	20707	148396	71083.3	9.24417	0	73		1	1	62732	59960	30673.5	9.24417	0	73		270316	63434	23265	251257
9.245	107	1	324	235	1	177	1	216	114	162	84	131.5		222	179	1	382	351	166	350	235.857	9.245	0	107		283	14	255	180	128	274	189	9.245	0	107		133	34	17	153	84.25	9.245	0	107		429	230	70	560
9.24583	83	1	420	1	1	136	1	205	1	40	1	80.7		268	1	1	464	1	262	356	193.286	9.24583	0	83		206	1	209	1	60	227	117.333	9.24583	0	83		1	31	249	189	117.5	9.24583	0	83		504	358	1	886
9.24667	145	22	821	680	1	362	180	254	253	1	137	271.1		602	270	185	682	195	182	817	419	9.24667	0	145		453	54	226	514	156	535	323	9.24667	0	145		116	113	278	205	178	9.24667	0	145		293	204	200	1139
9.2475	78	683	422	545	522	219	1	720	231	255	1	359.9		637	1	1	1	525	1	279	206.429	9.2475	0	78		146	1	231	277	1	328	164	9.2475	0	78		212	265	1	179	164.25	9.2475	0	78		302	909	1	1698
9.24833	427	1	1	1	1	1	1	1	1	1	1	1		1	1	1	1	1	1	1	1	9.24833	#DIV/0!	427		1	1	13	1	1	1	3	9.24833	0	427		1	1	1	1	1	9.24833	#DIV/0!	427		1	1	1	1
9.24917	221	444	782	578	507	492	375	434	581	488	316	499.7		515	493	1	707	978	486	789	567	9.24917	0	221		550	499	645	687	410	627	569.667	9.24917	0	221		497	396	479	551	480.75	9.24917	0	221		1009	576	488	1054
9.25	79	76449	1	1	1	1	1	1	1	6212	1	8266.9		16118	1	30680	1	306	46827	1	13419.1	9.25	0	79		1916	1	23890	1	1	2905	4785.67	9.25	0	79		1	1	1	1	1	9.25	0	79		1	1	1	1
9.25083	105	789	2224	1456	1	853	618	584	887	939	209	856		1417	680	1	1756	1316	590	2766	1218	9.25083	0	105		1339	1	1111	1109	585	1136	880.167	9.25083	0	105		357	405	726	857	586.25	9.25083	0	105		1569	785	492	3977
9.25167	368	1	1	1	1	1	1	1	1	1	1	1		1	1	1	1	1	1	1	1	9.25167	#DIV/0!	368		1	1	1	1	1	1	1	9.25167	#DIV/0!	368		1	1	1	1	1	9.25167	#DIV/0!	368		1	1	1	1
9.2525	103	2139	4399	3609	2427	2392	1215	1455	2361	1612	1196	2280.5		2300	1548	118	2904	3117	1317	7079	2626.14	9.2525	0	103		3375	3476	2064	2681	1276	3041	2652.17	9.2525	0	103		1	1	1365	1683	762.5	9.2525	-1518	103		2299	1331	1	8755
9.25333	133	4896	12397	8546	6026	5735	3053	1342	4927	4681	1	5160.4		7138	4157	1	11218	8266	2596	15699	7010.71	9.25333	0	133		7177	7690	5603	7619	2896	6015	6166.67	9.25333	0	133		3787	2897	4563	4259	3876.5	9.25333	0	133		10119	4347	4058	19253
9.25417	189	269	2638	1	659	1734	1	1	593	408	279	658.3		1988	489	1	2505	820	364	3145	1330.29	9.25417	0	189		2164	360	545	713	287	2022	1015.17	9.25417	0	189		285	289	462	479	378.75	9.25417	0	189		1311	399	301	4113
9.255	209	1909	11652	11399	2575	7139	1144	1052	2830	1814	1411	4292.5		9281	1728	1	12304	2981	1499	14713	6072.43	9.255	0	209		8960	1469	2379	3424	1238	8835	4384.17	9.255	0	209		1075	1084	2130	1683	1493	9.255	0	209		4523	1478	1347	19873
9.25583	207	20466	92229	90099	23237	58106	9900	9635	22919	15796	11976	35436.3		74226	15030	1	97692	24793	12791	115332	48552.1	9.25583	0	207		72203	12400	19927	29128	10716	69840	35702.3	9.25583	0	207		9490	9550	18361	14620	13005.2	9.25583	0	207		1	12583	11487	156692
9.25667	193	1406	3294	3113	1791	1897	763	662	2050	1302	1008	1728.6		2540	1130	1	3270	2141	927	5155	2166.29	9.25667	0	193		2499	1499	2424	2365	836	2366	1998.17	9.25667	0	193		736	730	1425	1160	1012.75	9.25667	0	193		3129	1174	952	6961
9.2575	191	5884	13534	12509	6713	8194	3006	2755	7693	5085	3913	6928.6		10276	4402	1	13912	8425	4075	19874	8709.29	9.2575	0	191		10165	10675	6567	9387	3394	9778	8327.67	9.2575	0	191		3100	2954	5390	4492	3984	9.2575	0	191		12279	5159	3492	26300
9.25833	165	626	1334	1243	876	798	432	492	1037	720	764	832.2		967	645	1	1297	1017	498	2052	925.286	9.25833	0	165		875	372	829	1119	434	946	762.5	9.25833	0	165		574	449	690	601	578.5	9.25833	0	165		1625	528	499	2775
9.25917	61	1	1	1	1	1	1	1	1	1	1	1		1	1	1	1	1	1	1	1	9.25917	#DIV/0!	61		1	1	1	1	1	1	1	9.25917	#DIV/0!	61		1	1	1	1	1	9.25917	#DIV/0!	61		7383	1	1	1
9.26	149	1171	1779	1348	468	1779	1	1261	2640	3083	2070	1560		2572	1832	1	1157	3546	5593	1764	2352.14	9.26	0	149		523	7358	822	899	1014	992	1934.67	9.26	0	149		268	1	1	647	229.25	9.26	-1330.75	149		903	1581	2877	5750
9.26083	296	1	3157	3152	1	1878	1	1	1	1	1	819.4		2576	1	1	3210	69	1	3415	1324.71	9.26083	0	296		2351	136	2371	3053	39	2425	1729.17	9.26083	0	296		76	40	118	52	71.5	9.26083	0	296		112	1	55	4690
9.26167	295	1	10131	10137	8262	6402	1	1	1	6926	96	4195.8		8347	1	1	10794	1	1	11090	4319.29	9.26167	0	295		8101	565	8016	10033	154	7975	5807.33	9.26167	0	295		1	1	360	1	90.75	9.26167	0	295		9636	10	173	15195
9.2625	268	1	128	94	194	140	79	63	169	136	86	109		115	131	1	229	195	90	1	108.857	9.2625	0	268		163	68	178	209	95	137	141.667	9.2625	0	268		74	77	123	142	104	9.2625	0	268		327	107	94	272
9.26333	147	1	1	1	1	44087	1	1	64004	1	1	10809.9		1	1	24155	1	1	1	1	3451.57	9.26333	0	147		1	1	1	1	1	1	1	9.26333	0	147		46682	9183	1	1	13966.8	9.26333	0	147		1	18107	1	1
9.26417	207	1	1	13421	1	18243	1	1	1	1	1	3167.2		15527	1	1	1	1	1	1	2219	9.26417	0	207		1	1	1	1	1	14543	2424.67	9.26417	0	207		1	1	1	1	1	9.26417	0	207		40070	1	1	1
9.265	237	1	1	17	1	1	1	1	1	1	1	2.6		1	1	1	1	1	1	1	1	9.265	0	237		1	1	1	1	1	1	1	9.265	0	237		4	1	1	1	1.75	9.265	0	237		1	1	1	1
9.26583	289	1	2	1	1	1	1	1	1	6	1	1.6		1	1	1	1	1	9	1	2.14286	9.26583	0	289		1	1	1	1	1	1	1	9.26583	0	289		1	1	1	1	1	9.26583	0	289		1	1	1	1
9.26667	135	1	1	1	1	1	1	1	1	1	1	1		1	1	1	1	1	1	1	1	9.26667	#DIV/0!	135		1	1	1	1	1	1	1	9.26667	#DIV/0!	135		1	1	1	1	1	9.26667	#DIV/0!	135		1	1	1	1
9.2675	94	1	1	193	230	1	1	1	1	1	1	43.1		1	1	162	1	1	1	1	24	9.2675	0	94		1	1	1	1	1	101	17.6667	9.2675	0	94		1	1	1	1	1	9.2675	0	94		1	1	1	87
9.26833	131	1	3838	3349	1	213	1090	1	1304	1226	289	1131.2		1760	1	803	3512	1	1	6254	1761.71	9.26833	0	131		6058	2573	2344	2618	361	1927	2646.83	9.26833	0	131		1358	851	2814	1262	1571.25	9.26833	0	131		472	1820	1	7251
9.27	148	1	3361	1	138	2647	1	548	4737	4146	7018	2259.8		3787	1254	1	1	1	8359	8469	3124.57	9.27	0	148		5894	15519	1110	431	1070	1632	4276	9.27	0	148		5292	297	1863	1	1863.25	9.27	0	148		1	2193	923	8624
9.27083	165	1	1	497	1	1027	1	1	1	1	1	153.2		644	1	1	1	1	1	1	92.8571	9.27083	0	165		710	1	1	1	1	605	219.833	9.27083	0	165		1	1	1	1	1	9.27083	0	165		1	1	1	1
9.27167	126	1	9	12	1	61	102	38	55	56	8	34.3		57	12	48	91	76	12	78	53.4286	9.27167	0	126		77	1	137	93	6	81	65.8333	9.27167	0	126		1	29	13	68	27.75	9.27167	0	126		157	82	1	223
9.2725	123	1	80	73	1	54	7	56	35	56	6	36.9		46	12	1	79	126	63	70	56.7143	9.2725	0	123		64	57	1	1	45	90	43	9.2725	0	123		74	59	40	57	57.5	9.2725	0	123		1	50	56	290
9.27417	201	1	5	1	1	1	1	1	1	1	1	1.4		1	1	1	1	1	1	1	1	9.27417	0	201		1	6	1	1	1	1	1.83333	9.27417	0	201		1	1	1	1	1	9.27417	0	201		1	12	1	186
9.275	238	1	1	1	1	1	7	1	1	1	1	1.6		1	1	1	1	1	1	1	1	9.275	0	238		1	1	21	1	1	1	4.33333	9.275	0	238		1	1	1	1	1	9.275	0	238		1	1	5	1
9.27583	246	1	1	1	1	1	1	1	1	1	1	1		1	1	1	1	61	1	54	17.1429	9.27583	0	246		45	1	1	1	1	1	8.33333	9.27583	0	246		1	1	1	19	5.5	9.27583	0	246		1	1	1	46
9.27667	225	1	236	158	295	242	148	113	359	234	204	199		222	204	1	405	371	166	303	238.857	9.27667	0	225		308	143	354	425	160	230	270	9.27667	0	225		182	135	236	250	200.75	9.27667	0	225		553	198	181	417
9.2775	234	1	1	1	1	1	177	159	251	1	199	79.2		1	264	1	1	344	154	1	109.429	9.2775	0	234		1	1	1	1	1	1	1	9.2775	0	234		1	1	178	303	120.75	9.2775	0	234		601	143	1	13
9.27833	226	1	34	1	1	1	1	1	10	5	4	5.9		1	1	1	45	12	1	39	14.2857	9.27833	0	226		67	4	15	59	5	1	25.1667	9.27833	0	226		1	12	24	47	21	9.27833	0	226		68	3	5	114
9.27917	338	1	1	1	1	10	1	1	1	1	1	1.9		1	1	1	18	1	1	1	3.42857	9.27917	0	338		1	1	33	1	1	1	6.33333	9.27917	0	338		1	1	1	1	1	9.27917	0	338		1	1	1	1
9.28	183	1	1	1	1	1	1	1	1	1	1	1		1	5	1	1	1	1	1	1.57143	9.28	0	183		33	1	1	1	1	1	6.33333	9.28	0	183		1	1	1	1	1	9.28	#DIV/0!	183		1	1	1	1
9.28083	182	1	20	1	1	3	1	1	1	1	1	3.1		1	1	1	1	1	1	1	1	9.28083	0	182		3	1	1	1	1	5	2	9.28083	0	182		1	1	1	1	1	9.28083	0	182		1	15	1	47
9.2825	261	1	19	19	1	1	20	1	1	1	1	6.5		1	23	1	34	1	1	1	8.85714	9.2825	0	261		1	1	1	1	1	1	1	9.2825	0	261		1	1	1	1	1	9.2825	0	261		1	1	1	29
9.28333	78	1	190	1	54	1	35	250	1	1	83	61.7		182	1	1	217	1	1	1	57.7143	9.28333	0	78		1	1	1	1	1	1	1	9.28333	0	78		1	1	1	78	20.25	9.28333	0	78		1	1	1	1
9.28417	175	1	1	1	1	1	1	1	1	1	1	1		1	1	549	1	1	1	541	156.429	9.28417	0	175		1	971	1	1	1	1	162.667	9.28417	0	175		1	1	1	1	1	9.28417	#DIV/0!	175		1	1	1	1041
9.285	72	1	6061	1	1	1	1	5478	1	1	2699	1424.5		1	1	3733	1	1	1	1	534.143	9.285	0	72		1	7650	1	1	1	1	1275.83	9.285	0	72		1	1	1	1	1	9.285	0	72		1	4212	1	1
9.28583	152	1	1	508	622	612	1	453	1	1	1	220.1		1	1	640	380	1	1	1	146.429	9.28583	0	152		1	1	355	1	516	467	223.5	9.28583	0	152		667	1	527	1	299	9.28583	0	152		873	314	476	1
9.28667	68	1	97	146	1	1	417	1	1	72	1	73.8		1	1	104	228	1	1	66	57.4286	9.28667	0	68		1	1	1	1	1	1	1	9.28667	0	68		1	1	1	1	1	9.28667	0	68		1	1	1	1
9.2875	157	1	95	106	23	64	77	68	79	56	32	60.1		90	1	15	140	105	35	75	65.8571	9.2875	0	157		91	8	105	62	38	83	64.5	9.2875	0	157		65	48	1	66	45	9.2875	0	157		21	74	44	12
9.28833	153	1	161	301	228	273	201	1	1	331	354	185.2		1	275	1	1	1	1	1	40.1429	9.28833	-145.057	153		1	138	250	1	1	185	96	9.28833	0	153		378	1	1	1	95.25	9.28833	0	153		662	166	340	1
9.28917	155	1	1	1	1	1	1	1	1	1	1	1		1	1	1221	1737	1	1	1083	577.857	9.28917	576.857	155		1061	1	1	1	1	1	177.667	9.28917	0	155		1	1	1	9	3	9.28917	0	155		1	78	1	12
9.29	156	1	146	1	1	1	1	1	1	1	29	18.3		1	1	162	201	1	1	120	69.5714	9.29	0	156		181	1	1	1	1	1	31	9.29	0	156		1	1	1	1	1	9.29	0	156		1	1	1	1
9.29083	127	1	1225	277	200	1	689	1	10	189	1	259.4		1	1	1333	2271	1	1	1083	670.143	9.29083	0	127		961	1	1120	692	1	239	502.333	9.29083	0	127		1	1	1	1	1	9.29083	0	127		1	1	1	559
9.29167	93	1	167	1	1	181	1	246	1	14	123	73.6		1	27	1	311	1	1	17	51.2857	9.29167	0	93		285	1	1	337	1	105	121.667	9.29167	0	93		195	1	1	1	49.5	9.29167	0	93		446	1	1	675
9.2925	63	105	141	169	70	1	1	203	289	1	1	98.1		120	75	1	1	163	206	107	96.1429	9.2925	0	63		1	1	1	303	1	16	53.8333	9.2925	0	63		89	37	57	1	46	9.2925	0	63		1	1	13	1
9.29333	193	4	1	997	1	1514	1	1	1	1	1	252.2		1223	1	1	1	1	1	1	175.571	9.29333	0	193		1617	1255	1760	1	1	1291	987.5	9.29333	735.3	193		1	1	1	1	1	9.29333	0	193		1	219	1	1
9.29417	161	6	366	353	343	344	301	250	363	178	172	267.6		296	401	1	282	247	301	232	251.429	9.29417	0	161		169	185	204	259	202	120	189.833	9.29417	0	161		1	65	444	128	159.5	9.29417	0	161		372	235	190	1
9.295	147	1	1	1	1380	40772	1	35670	1	23801	54810	15643.8		23145	1	1	1	40612	1	49091	16121.7	9.295	0	147		1	95811	1	22252	12307	1	21728.8	9.295	0	147		1	1	1	1	1	9.295	0	147		1	22293	1	1
9.29583	75	36155	1	28964	35627	10060	22859	22416	26129	15764	13816	21179.1		11677	28414	43857	34115	19219	23730	14334	25049.4	9.29583	0	75		17502	52247	16578	25998	16330	11307	23327	9.29583	0	75		5970	7042	36446	13431	15722.2	9.29583	0	75		33184	19854	19303	35471
9.29667	117	56432	42041	40010	48641	16218	32735	29270	38273	24035	21826	34948.1		15637	41908	1	44377	28703	38213	27519	28051.1	9.29667	0	117		23782	98918	25191	34352	23760	15276	36879.8	9.29667	0	117		14832	14325	55053	22811	26755.2	9.29667	0	117		48724	37465	27676	50496
9.2975	61	6425	5416	873	6213	1551	4136	5072	4455	2698	2182	3902.1		2244	4466	1	6226	3192	4203	4844	3596.57	9.2975	0	61		2668	10650	2676	4595	1	2074	3777.33	9.2975	0	61		1	1108	5553	2333	2248.75	9.2975	0	61		5290	1945	1	4717
9.29833	60	2040	1838	1525	2185	1	1094	1902	1434	940	673	1363.2		763	1553	1	1950	1329	1428	1532	1222.29	9.29833	0	60		1239	3045	989	1725	1	681	1280	9.29833	0	60		1	219	1873	979	768	9.29833	0	60		2578	1024	1264	1482
9.29917	74	9041	4069	5655	7751	2478	1888	1	1	2973	1356	3521.3		2211	5291	1	6064	5703	3150	5660	4011.43	9.29917	0	74		3968	20830	4433	5275	455	2660	6270.17	9.29917	0	74		1	1	5819	2766	2146.75	9.29917	0	74		10823	5600	1	1
9.3	94	99	260	1	1	13	9	1	1	1	1	38.7		1	1	491	129	1	1	108	104.571	9.3	0	94		143	377	1	166	1	1	114.833	9.3	0	94		6	1	1	1	2.25	9.3	0	94		1	70	1	1
9.30083	92	1	1	47	1	1	1	10	1	1	1	6.5		1	1	1	1	58	1	1	9.14286	9.30083	0	92		1	21	1	1	1	1	4.33333	9.30083	0	92		1	1	1	1	1	9.30083	0	92		163	1	1	1
9.30167	208	1	25	3	1	3855	1	2	1	1	1	389.1		3293	1	1	1	1	1	1	471.286	9.30167	0	208		1	1	1	1	1	3018	503.833	9.30167	0	208		38	1	1	1	10.25	9.30167	0	208		8325	1	1	1
9.3025	79	1	1	1	1	1	1	39581	1	1	1	3959		1	75598	35184	1	1	47038	1	22546.3	9.3025	0	79		761	1	22463	1417	1	5453	5016	9.3025	0	79		1	99	1	1	25.5	9.3025	0	79		1	1	1	1
9.30333	103	1	1	1	521	1839	369	605	607	260	258	446.2		1	1	1	1	525	1	1635	309.286	9.30333	0	103		476	1	1	539	1	321	223.167	9.30333	0	103		1	1	1	126	32.25	9.30333	0	103		1	270	1	1
9.30417	254	1	1	1	1	1	1	1	1	1	1	1		1	1	1	1	1	21	1	3.85714	9.30417	0	254		1	1	1	1	1	1	1	9.30417	#DIV/0!	254		1	1	1	1	1	9.30417	#DIV/0!	254		41	1	1	47
9.305	84	779	502	1586	1054	409	2881	1	516	1231	1	896		354	156	1	1	1	1	450	137.714	9.305	-758.286	84		1	1	4697	3247	360	1188	1582.33	9.305	0	84		1	108	107	164	95	9.305	0	84		590	1	333	1
9.30583	85	1403	1424	3462	2214	598	7201	1	1	2826	1	1913.1		433	304	1	4213	271	200	1	774.714	9.30583	0	85		1	1	11483	7665	665	2534	3724.83	9.30583	0	85		250	102	199	167	179.5	9.30583	0	85		315	1	667	1
9.30667	71	2979	2604	6372	4651	1220	12950	374	1892	5295	1	3833.8		828	1322	1	7684	946	1014	1586	1911.57	9.30667	0	71		1	1	20885	14535	1449	3866	6789.5	9.30667	0	71		743	394	1354	704	798.75	9.30667	0	71		1795	1229	1504	1
9.3075	165	1	1	1	1	52	1	46	1	1	1	10.6		1	1	43	1	1	1	1	7	9.3075	0	165		1	1	1	1	1	1	1	9.3075	0	165		1	1	1	1	1	9.3075	0	165		1	18	1	1
9.30833	440	1	8	1	1	1	1	1	1	1	1	1.7		1	1	1	1	1	1	1	1	9.30833	0	440		1	1	1	1	1	1	1	9.30833	0	440		1	1	1	8	2.75	9.30833	0	440		1	1	1	1
9.31	112	1	10	268	263	136	415	1	174	209	1	147.8		75	1	1	16	1	1	1	13.7143	9.31	-134.086	112		1	47	606	463	4	182	217.167	9.31	0	112		1	1	1	1	1	9.31	0	112		1	1	1	1
9.31083	83	153	191	1	417	1	598	1	1	402	1	176.6		80	1	1	417	1	1	1	71.7143	9.31083	0	83		1	178	1028	1	333	59	266.667	9.31083	0	83		380	1	1	1	95.75	9.31083	0	83		1	1	318	1
9.31167	73	1	57488	57005	53510	1	20433	1	48390	30846	1	26767.6		20587	29773	1	48053	52491	53166	50643	36387.7	9.31167	0	73		1	201573	16540	50645	14037	19852	50441.3	9.31167	0	73		1	17991	64419	32049	28615	9.31167	0	73		70016	65826	11628	1
9.3125	68	95	1	1	159	1	1	1	1	1	1	26.2		1	1	407	1	1	1	1	59	9.3125	0	68		1	1	656	329	1	61	174.833	9.3125	0	68		1	1	1	1	1	9.3125	0	68		1	1	1	1
9.31333	98	1	1	121	21	1	275	1	1	78	53	55.3		1	1	1	1	1	1	1	1	9.31333	0	98		1	1	580	370	7	93	175.333	9.31333	0	98		160	1	1	1	40.75	9.31333	0	98		298	1	1	1
9.31417	205	1	1	1	1	1	7	1	10	1	1	2.5		113	1	382	1	1	43	316	122.429	9.31417	119.929	205		1	1	1	1	1	103	18	9.31417	0	205		1	1	1	1	1	9.31417	0	205		1	24	1	1
9.315	70	2546	2013	3347	3298	1089	1	1	1	2447	642	1538.5		1	867	4549	1	959	718	1	1013.71	9.315	0	70		1920	1	7876	6301	1061	2444	3267.17	9.315	0	70		856	454	1	802	528.25	9.315	0	70		2126	818	1086	1296
9.31583	65	131	1775	284	229	1	1	1	1	1	112	253.6		1	50	713	1375	1	1	632	396.143	9.31583	0	65		1	1591	1	624	85	1	383.833	9.31583	0	65		252	58	1	18	82.25	9.31583	0	65		1	843	102	1
9.31667	105	1	327	107	1	1	137	62	127	157	1	92.1		101	1	1882	63	18	1	1868	562	9.31667	0	105		1	1055	1	1	83	1	190.333	9.31667	0	105		1	1	1	1	1	9.31667	0	105		1	126	1	1
9.3175	174	5284	4394	4119	6656	4074	3880	3402	4179	3554	2909	4245.1		2262	4317	5033	6292	4000	3535	5048	4355.29	9.3175	0	174		4023	2726	4415	5171	2679	3032	3674.33	9.3175	0	174		2848	2536	4586	3866	3459	9.3175	0	174		9039	3131	2671	5939
9.31833	130	5419	4565	3908	6500	3725	3762	3010	4855	3658	3038	4244		2412	4518	1	6771	3469	3635	4204	3572.86	9.31833	0	130		3512	2918	4240	4869	2795	3080	3569	9.31833	0	130		3106	2139	5309	3537	3522.75	9.31833	0	130		7072	2592	2788	7246
9.31917	86	1268	1022	1186	1747	827	873	629	1024	985	628	1018.9		606	936	1717	1	917	755	1	704.714	9.31917	0	86		954	664	1436	1720	691	878	1057.17	9.31917	0	86		1	334	536	801	418	9.31917	-600.9	86		1742	618	632	1289
9.32	153	1	1	1	1	1	1	1	1	1	1	1		148	1	1	1	1	1	1	22	9.32	0	153		1	97	1	1	1	1	17	9.32	0	153		1	280	1	1	70.75	9.32	0	153		1	1	1	174
9.32083	114	186	1	1	1	1	1	1	1	1	182	37.6		71	1	189	1	1	1	1	37.8571	9.32083	0	114		66	89	1	1	253	1	68.5	9.32083	0	114		1	1	1	1	1	9.32083	0	114		217	110	255	1
9.32167	107	1	1	1	1	1	1	1	1	1	1	1		1	1	262	1	1	1	1	38.2857	9.32167	0	107		1	1	1	1	57	1	10.3333	9.32167	0	107		62	1	1	1	16.25	9.32167	0	107		1	1	1	1
9.3225	265	1	1	1	1	1	1	1	1	1	1	1		28	1	1	1	1	1	5	5.42857	9.3225	0	265		1	86	1	1	1	1	15.1667	9.3225	0	265		1	1	1	21	6	9.3225	0	265		1	1	1	1
9.32417	354	1	1	1	1	1	1	1	1	1	1	1		1	5	1	1	1	1	1	1.57143	9.32417	0	354		1	1	1	1	1	1	1	9.32417	#DIV/0!	354		1	1	1	1	1	9.32417	#DIV/0!	354		1	1	1	1
9.325	153	178	347	404	1	1	237	622	215	1	614	262		152	338	538	1	63	1	232	189.286	9.325	0	153		258	83	1	1	411	177	155.167	9.325	0	153		578	277	1	328	296	9.325	0	153		1	181	548	792
9.32583	79	1	1	1	1	1	1	1	1	1	1	1		1	1	1	1	1	1	1	1	9.32583	#DIV/0!	79		1	1	1	1	1	1	1	9.32583	#DIV/0!	79		1	1	1	1	1	9.32583	#DIV/0!	79		1	1	1	1
9.32667	235	1	81	53	1	101	1	1	1	47	1	28.8		56	1	100	104	1	1	87	50	9.32667	0	235		77	1	76	124	1	37	52.6667	9.32667	0	235		1	1	1	1	1	9.32667	0	235		1	1	1	34
9.3275	151	1	1	990	1	647	701	492	818	741	498	489		475	697	2252	1	423	646	1	642.143	9.3275	0	151		869	2793	711	1029	434	590	1071	9.3275	0	151		328	247	535	399	377.25	9.3275	0	151		912	474	365	138
9.32833	236	1	8	24	1	55	5	1	31	7	4	13.7		7	1	72	16	42	6	12	22.2857	9.32833	0	236		46	1	1	1	19	1	11.5	9.32833	0	236		40	17	1	23	20.25	9.32833	0	236		82	14	5	1
9.32917	243	1	1	1	1	1	1	1	1	1	1	1		1	1	41	1	1	1	1	6.71429	9.32917	0	243		1	1	1	1	1	1	1	9.32917	#DIV/0!	243		1	1	1	22	6.25	9.32917	0	243		1	1	1	1
9.33	128	153	1	1	1	79	1	129	63	1	1	43		1	1	103	249	1	1	45	57.2857	9.33	0	128		1	456	164	131	1	1	125.667	9.33	0	128		1	1	65	1	17	9.33	0	128		115	1	1	142
9.33083	67	1	1	581	358	121	1	469	564	1	111	220.8		1	1	3930	1	1	1	1	562.286	9.33083	0	67		193	1	1003	907	1	558	443.833	9.33083	0	67		1	72	1	19	23.25	9.33083	0	67		1	587	1	1
9.33167	120	1	1	1	1	1	1	580	1383	1	624	259.4		556	447	647	1	1	661	1	330.571	9.33167	0	120		267	1075	1	1	1	991	389.333	9.33167	0	120		1	44	1412	1	364.5	9.33167	0	120		1943	592	1	1
9.33417	104	1	1	1	1	529	1	1	1	429	1	96.6		485	1	804	1	1	1	588	268.714	9.33417	0	104		17	1	711	739	23	1	248.667	9.33417	0	104		1	1	1	1	1	9.33417	0	104		1046	24	18	1
9.335	99	1	657	614	753	185	1035	418	260	489	1	441.3		263	377	2259	890	1	79	908	682.429	9.335	0	99		252	492	1280	903	1	52	496.667	9.335	0	99		220	1	1	327	137.25	9.335	0	99		1	345	234	127
9.33583	152	1	1	599	615	1	352	1	635	399	615	321.9		387	706	4275	1	649	856	1	982.143	9.33583	0	152		719	1	1	581	1	1	217.333	9.33583	0	152		1	329	1	493	206	9.33583	0	152		1	1	1	1
9.33667	90	1	100	13	147	1	1	1	10	1	1	27.6		1	9	471	279	137	1	1	128.429	9.33667	0	90		1	1	152	140	1	1	49.3333	9.33667	0	90		1	1	1	1	1	9.33667	0	90		1	1	1	1
9.3375	148	1	1	1	1	1	1	1	1	1	1	1		1	1	17410	1	1	1	25871	6183.71	9.3375	0	148		5862	1	1	1	1	1	977.833	9.3375	0	148		1	86	1	1	22.25	9.3375	0	148		1	1	1	1
9.33833	73	1	1	1	1	21651	1	1	1	1	1	2166		1	1	226180	1	1	1	263377	69937.4	9.33833	0	73		1	1	1	1	1	1	1	9.33833	0	73		1	1	1	1	1	9.33833	0	73		1	1	1	1
9.33917	72	1	1	5272	5142	3178	4502	1	4599	3809	1	2650.6		2114	4829	9239	5816	6329	2654	10646	5946.71	9.33917	3296.11	72		6293	1	4584	5338	2075	3364	3609.17	9.33917	0	72		1	1724	5005	2686	2354	9.33917	0	72		6891	1	824	5542
9.34	103	1	31030	1	4801	220	1	1	1	1	3429	3948.6		1	1	4555	4305	1	1	6188	2150.29	9.34	0	103		1	1	3703	4948	1	2789	1907.17	9.34	0	103		1	4261	409	1	1168	9.34	0	103		1	20812	1	8673
9.34167	131	1	1	1	1	1	1	1	1	1	1	1		1	1	7420	1733	1	462	10068	2812.29	9.34167	2811.29	131		1	1	1	1	1	1070	179.167	9.34167	0	131		1	676	1	1	169.75	9.34167	0	131		472	1	1	1
9.3425	142	1	242	8	1	1	1	1	1	1	1	25.8		1	1	254	402	1	1	191	121.571	9.3425	0	142		230	1	1	234	1	1	78	9.3425	0	142		1	1	1	1	1	9.3425	0	142		23	1	1	1
9.34333	256	1	1	1	1	1	1	5	1	1	1	1.4		1	1	1	1	1	1	1	1	9.34333	0	256		1	1	1	1	1	1	1	9.34333	0	256		1	1	1	1	1	9.34333	0	256		1	1	1	1
9.34417	237	1	1	3	1	1	1	1	1	1	1	1.2		1	1	1	43	1	1	1	7	9.34417	0	237		1	1	1	1	1	1	1	9.34417	0	237		15	1	1	1	4.5	9.34417	0	237		1	1	1	1
9.345	154	1	1	1	1	1	1	1	1	1	2912	292.1		1	1	1	1	1	2183	13	314.429	9.345	0	154		1	686	1	1	1	1	115.167	9.345	0	154		2342	1	1	1	586.25	9.345	0	154		1	1	1	1657
9.34667	82	1	1	1	1	1	1	1	1	1	48	5.7		1	1	1	1	1	1	97	14.7143	9.34667	0	82		1	1	1	91	1	1	16	9.34667	0	82		1	76	1	1	19.75	9.34667	0	82		1	1	1	1
9.3475	242	1	1	1	1	1	1	1	1	1	1	1		1	1	1	1	1	27	48	11.4286	9.3475	0	242		1	1	1	1	1	1	1	9.3475	#DIV/0!	242		56	1	1	1	14.75	9.3475	0	242		1	27	1	1
9.34833	112	1	416	8	1	1	1	38	1	1	61	52.9		1	1	376	1113	1	1	308	257.286	9.34833	0	112		138	1	1	1	27	1	28.1667	9.34833	0	112		1	1	1	25	7	9.34833	0	112		1	57	34	1
9.34917	333	1	1	1	1	1	1	1	1	14	1	2.3		1	1	1	1	1	1	1	1	9.34917	0	333		1	1	1	1	1	1	1	9.34917	0	333		1	1	1	1	1	9.34917	0	333		1	1	1	1
9.35	137	4	153	35	1	1	33	1	1	1	1	23.1		1	1	1	58	1	94	23	25.5714	9.35	0	137		38	399	1	1	1	1	73.5	9.35	0	137		83	1	6	1	22.75	9.35	0	137		1	94	4	80
9.35083	289	1	1	1	1	1	1	1	1	1	1	1		1	1	5	1	1	1	1	1.57143	9.35083	0	289		1	3	1	1	1	1	1.33333	9.35083	0	289		1	1	1	1	1	9.35083	#DIV/0!	289		1	14	1	1
9.35167	166	1	293	166	30	64	176	1	60	9	50	85		28	127	1	219	1	247	234	122.429	9.35167	0	166		119	842	1	1	1	12	162.667	9.35167	0	166		1	1	1	17	5	9.35167	0	166		1	153	7	631
9.3525	387	1	1	1	1	1	1	5	1	1	1	1.4		1	1	1	1	31	1	1	5.28571	9.3525	0	387		1	28	1	1	1	1	5.5	9.3525	0	387		1	1	1	1	1	9.3525	0	387		1	1	1	1
9.35333	241	1	1	1	1	1	56	30	1	1	1	9.4		1	1	159	1	57	55	111	55	9.35333	45.6	241		1	6	1	1	27	1	6.16667	9.35333	0	241		107	14	1	1	30.75	9.35333	0	241		1	1	1	1
9.35417	452	1	1	1	32	15	1	4	1	1	1	5.8		1	1	1	1	1	1	1	1	9.35417	0	452		1	1	1	1	1	1	1	9.35417	0	452		1	1	1	1	1	9.35417	0	452		1	1	1	1
9.355	253	1	1	1	1	1	1	20	1	13	1	4.1		1	1	1	1	1	1	1	1	9.355	0	253		1	1	1	1	1	1	1	9.355	0	253		1	1	1	1	1	9.355	0	253		1	1	1	16
9.35583	108	1	72	1	1	1	1	1	10	1	7	9.6		1	1	61	19	1	1	54	19.7143	9.35583	0	108		1	1	12	1	5	1	3.5	9.35583	0	108		7	1	1	1	2.5	9.35583	0	108		1	8	1	19
9.35667	96	1	202	30	1	1	1	1	413	1	376	102.7		1	1	25	1	1	477	1	72.4286	9.35667	0	96		1	363	1	48	1	1	69.1667	9.35667	0	96		1	1	56	1	14.75	9.35667	0	96		1	407	1	281
9.3575	296	1	1	1	1	1	1	1	1	1	1	1		1	1	1	1	1	1	1	1	9.3575	#DIV/0!	296		1	1	1	1	1	1	1	9.3575	#DIV/0!	296		1	1	1	1	1	9.3575	#DIV/0!	296		1	1	1	1
9.35833	107	1	1055	1	1	3	1	1	1	1	139	120.4		1	1	1	413	1	1	84	71.7143	9.35833	0	107		1	1	1	1	1	1	1	9.35833	0	107		258	96	1	1	89	9.35833	0	107		295	1	1	1
9.35917	143	1	1	267	296	1	1	1	1	1	1	57.1		5	1	1	1	1	1	1	1.57143	9.35917	0	143		1	1	83	1	1	93	30	9.35917	0	143		1	1	1	1	1	9.35917	0	143		1	1	1	1
9.36	295	1	1	1	1	1	1	1	1	1	1	1		1	1	1	1	1	12	1	2.57143	9.36	0	295		1	1	1	1	22	1	4.5	9.36	0	295		1	1	1	1	1	9.36	#DIV/0!	295		1	33	1	1
9.36083	64	1149	1	896	1199	562	707	1	843	645	156	615.9		486	642	1	1	1	85	13	175.571	9.36083	-440.329	64		1	1	552	1016	204	551	387.5	9.36083	0	64		1	7	1	1	2.5	9.36083	-613.4	64		1	166	176	332
9.36167	97	657	759	328	445	76	1	1	1	149	40	245.7		98	1	354	454	1	273	310	213	9.36167	0	97		201	697	152	322	6	116	249	9.36167	0	97		204	1	1	1	51.75	9.36167	0	97		1	269	50	1
9.3625	177	599	861	321	238	116	287	176	227	222	122	316.9		74	278	1	562	177	524	261	268.143	9.3625	0	177		129	1772	198	172	237	132	440	9.3625	0	177		1	170	202	141	128.5	9.3625	0	177		1	482	242	548
9.36333	205	817	981	491	277	183	418	373	336	343	239	445.8		117	416	576	622	329	839	1	414.286	9.36333	0	205		229	3043	241	200	1	189	650.5	9.36333	0	205		1	1	540	290	208	9.36333	0	205		204	753	1	718
9.36417	149	97927	76034	13477	10381	9096	29114	8575	15662	13103	7486	28085.5		6534	14762	1638	13499	7644	49054	9973	14729.1	9.36417	0	149		5809	169363	8758	10471	5709	6507	34436.2	9.36417	0	149		13116	3172	7721	5539	7387	9.36417	0	149		14210	47390	7844	18043
9.365	73	2000106	1551653	289979	247667	187086	598493	124010	323804	260056	111411	569426		126832	293227	61147	315158	149874	922804	71545	277227	9.365	0	73		116606	2474092	195146	261703	120410	139434	551232	9.365	0	73		230293	114313	203397	136905	171227	9.365	0	73		340313	969979	115159	433670
9.36583	131	63429	49169	12351	8599	5424	19795	8600	11655	8644	5391	19305.7		3642	7264	31655	11122	4419	29903	1	12572.3	9.36583	0	131		4482	81096	7020	8510	4585	4946	18439.8	9.36583	0	131		10354	4080	11825	5280	7884.75	9.36583	0	131		10726	30340	5325	16371
9.36667	77	29037	20219	1	10183	7679	1	1	1	1	1	6712.4		1	1	4103	12532	6683	16538	5823	6525.86	9.36667	0	77		6722	15164	8237	6180	1	3614	6653	9.36667	0	77		8586	2755	6280	1	4405.5	9.36667	0	77		8015	1	3520	10289
9.3675	84	3849	5696	1	1	1	1533	1	1651	1	1118	1385.2		1	988	2625	7972	1	2154	2150	2270.14	9.3675	0	84		680	4206	1	1	827	1	952.667	9.3675	0	84		1549	1	1	548	524.75	9.3675	0	84		1	2397	739	1
9.36833	78	3540	2586	495	1	1	1258	1	19	99	686	868.6		289	1	852	1682	1	1497	740	723.143	9.36833	0	78		1	1444	47	684	410	230	469.333	9.36833	0	78		1	70	1	1	18.25	9.36833	0	78		1	1450	1	1571
9.36917	79	91650	1	1	13454	1	1	37503	1	12896	1	15550.9		1	82711	1	1	1	57398	1	20016.3	9.36917	0	79		1439	1	25222	2811	9598	8522	7932.17	9.36917	0	79		1	747	8315	1	2266	9.36917	0	79		1	5628	1	1
9.37	189	141	286	1	1	1	1	1	1	1	1	43.5		1	1	1440	143	1	1	1	226.857	9.37	0	189		96	1	1	19	1	56	29	9.37	0	189		1	1	1	1	1	9.37	0	189		306	1	1	1
9.37083	195	1	257	1	1	1	84	1	9	9	12	37.6		1	1	1	1	1	137	1	20.4286	9.37083	0	195		1	790	1	1	1	1	132.5	9.37083	0	195		1	1	37	1	10	9.37083	0	195		1	148	1	19
9.37167	93	1167	1	1	1	1	1	1	1	1	138	131.3		1	1	402	751	83	1	1	177.143	9.37167	0	93		277	9239	1	1	1	1	1586.67	9.37167	0	93		84	1	1	1	21.75	9.37167	0	93		368	158	1	1
9.3725	83	7038	6251	4269	3015	5899	2747	4431	6885	4417	8035	5298.7		2343	4227	1	4716	2639	6080	4986	3570.29	9.3725	0	83		7439	4087	2120	5685	6288	2037	4609.33	9.3725	0	83		4888	1149	3362	3183	3145.5	9.3725	0	83		3140	2325	6275	14489
9.37333	152	4227	3663	3250	2244	4201	1762	2917	4644	2883	5422	3521.3		1639	2992	330	2932	1899	4311	3468	2510.14	9.37333	0	152		5051	1864	1475	3982	4338	1537	3041.17	9.37333	0	152		3406	891	2411	2221	2232.25	9.37333	0	152		2374	1306	4272	10019
9.37417	167	1	134	1	1	1	49	1	8	1	1	19.8		1	1	1	1	1	69	1	10.7143	9.37417	0	167		1	787	1	1	1	1	132	9.37417	0	167		1	1	10	1	3.25	9.37417	0	167		1	100	1	89
9.375	267	1	6	27	1	1	1	1	1	1	1	4.1		1	1	1	1	1	1	1	1	9.375	0	267		1	58	1	1	1	1	10.5	9.375	0	267		10	1	1	1	3.25	9.375	0	267		1	34	17	1
9.37583	211	1	154	1	1	1	52	9	1	1	52	27.3		20	1	1	1	1	88	1	16.1429	9.37583	0	211		1	652	1	1	96	1	125.333	9.37583	0	211		8	61	18	1	22	9.37583	0	211		1	111	78	58
9.37667	265	1	9	1	1	1	32	1	1	1	1	4.9		1	1	1	1	81	1	1	12.4286	9.37667	0	265		1	1	1	1	1	1	1	9.37667	0	265		1	1	1	71	18.5	9.37667	0	265		1	1	1	1
9.37833	390	1	1	1	1	1	1	1	1	1	1	1		1	1	1	1	1	1	1	1	9.37833	#DIV/0!	390		1	17	1	1	1	1	3.66667	9.37833	0	390		1	1	1	1	1	9.37833	#DIV/0!	390		1	1	1	1
9.37917	455	1	1	1	1	1	1	1	1	1	1	1		1	1	8	1	1	1	1	2	9.37917	0	455		1	1	11	1	1	1	2.66667	9.37917	0	455		1	1	1	1	1	9.37917	#DIV/0!	455		1	1	1	1
9.38	153	356	1	1	27	394	1	754	423	436	1	239.4		1	1	1	225	1	1	1	33	9.38	0	153		502	1	260	464	1	1	204.833	9.38	0	153		1	213	147	1	90.5	9.38	0	153		1	1	1	1
9.38083	339	1	1	1	1	1	1	1	1	1	1	1		1	1	1	1	1	1	1	1	9.38083	#DIV/0!	339		1	29	1	1	1	1	5.66667	9.38083	0	339		1	1	1	1	1	9.38083	#DIV/0!	339		1	1	1	1
9.38167	391	1	1	22	1	1	1	1	1	1	11	4.1		1	1	1	1	1	1	1	1	9.38167	0	391		1	1	1	1	1	1	1	9.38167	0	391		1	1	1	1	1	9.38167	0	391		1	1	1	1
9.38333	95	1	1	215	1	68	233	1	1	109	1	63.1		1	1	421	1	299	912	424	294.143	9.38333	0	95		1	1	1	19	1	1	4	9.38333	0	95		1	1	1	1	1	9.38333	0	95		48	1	1	1
9.38417	155	1	1	1	1	1	81	56	223	57	1	42.3		1	1	1	1	1	272	1	39.7143	9.38417	0	155		1	95	1	1	74	1	28.8333	9.38417	0	155		290	1	1	9	75.25	9.38417	0	155		1	196	1	174
9.385	490	1	1	1	1	1	1	1	1	1	1	1		1	1	1	1	1	1	1	1	9.385	#DIV/0!	490		15	1	1	1	1	1	3.33333	9.385	0	490		1	1	1	1	1	9.385	#DIV/0!	490		1	1	1	1
9.38583	234	1	327	281	297	374	1	1	1	234	4	152.1		227	1	382	562	1	35	396	229.143	9.38583	0	234		380	270	324	432	1	184	265.167	9.38583	0	234		5	1	1	1	2	9.38583	0	234		1	46	1	286
9.38667	235	1	1	1	1	1	1	1	1	1	1	1		1	1	1	1	1	1	1	1	9.38667	#DIV/0!	235		1	57	1	1	1	1	10.3333	9.38667	0	235		1	1	1	1	1	9.38667	#DIV/0!	235		1	1	1	62
9.3875	174	1	1	1	1	1	1	1	1	1	1	1		1	1	104	1	1	1	1	15.7143	9.3875	0	174		1	550	1	1	1	1	92.5	9.3875	0	174		1	1	1	1	1	9.3875	#DIV/0!	174		1	1	1	1
9.38833	286	1	1	1	1	1	1	1	13	1	1	2.2		1	1	1	1	1	1	1	1	9.38833	0	286		1	1	1	1	1	1	1	9.38833	0	286		1	1	1	1	1	9.38833	0	286		1	1	1	1
9.38917	229	1	1	6	1	1	1	1	1	1	1	1.5		1	1	1	1	1	1	1	1	9.38917	0	229		1	1	7	1	1	1	2	9.38917	0	229		1	1	1	1	1	9.38917	0	229		1	1	1	1
9.39	142	20	1	192	220	1	1	1	1	1	1	43.9		74	1	1	1	134	1	1	30.4286	9.39	0	142		245	50	1	149	1	1	74.5	9.39	0	142		1	1	1	158	40.25	9.39	0	142		162	1	1	280
9.39167	188	182	250	444	368	281	355	295	389	455	178	319.7		150	362	1	420	221	262	1	202.429	9.39167	0	188		261	148	313	167	98	169	192.667	9.39167	-127.033	188		413	128	164	287	248	9.39167	0	188		333	122	119	1
9.3925	123	1	166	362	256	176	271	229	299	401	137	229.8		111	301	1	342	166	197	1	159.857	9.3925	0	123		137	303	259	132	87	68	164.333	9.3925	0	123		224	98	95	180	149.25	9.3925	0	123		187	76	83	1
9.39333	69	1	1	2084	2414	1824	1806	1	2698	2363	1	1319.3		822	1015	1	1896	1650	2785	1	1167.14	9.39333	0	69		2393	3325	1321	1	1	698	1289.83	9.39333	0	69		1	968	1	1563	633.25	9.39333	0	69		2036	520	2057	10363
9.39417	81	1754	1	1896	1443	1187	1659	1475	1872	2255	836	1437.8		655	1630	1	2119	1119	1541	1	1009.43	9.39417	0	81		948	1601	1478	507	724	485	957.167	9.39417	0	81		2047	827	1039	1201	1278.5	9.39417	0	81		1264	673	806	1
9.395	271	1	35	95	1	48	68	74	89	102	50	56.3		37	51	60	62	64	56	21	50.1429	9.395	0	271		54	48	82	1	25	6	36	9.395	0	271		60	28	1	66	38.75	9.395	0	271		1	31	25	1
9.39583	68	1	1	337	1	202	308	1	1	381	1	123.4		164	1	1	1	1	250	12	61.4286	9.39583	0	68		123	1	18	1	1	1	24.1667	9.39583	0	68		1	132	407	240	195	9.39583	0	68		1	170	1	1480
9.39667	122	3293	2388	4505	3424	2724	3807	3342	4193	5253	1918	3484.7		1646	4204	1	4514	2364	2983	1	2244.71	9.39667	0	122		1969	1178	3506	1608	1333	1207	1800.17	9.39667	-1684.53	122		3273	1617	1725	2647	2315.5	9.39667	0	122		2996	1171	1358	249
9.3975	78	1	1	1251	1846	1020	1	447	904	1143	1	661.5		1	1	58	1093	479	1	1	233.429	9.3975	0	78		352	5086	694	1	156	1	1048.33	9.3975	0	78		860	1	948	654	615.75	9.3975	0	78		756	1	1	1
9.39833	198	1	1	14	1	1	1	1	1	1	1	2.3		1	1	1	1	1	1	1	1	9.39833	0	198		1	18	1	1	1	1	3.83333	9.39833	0	198		12	1	1	1	3.75	9.39833	0	198		1	1	1	1
9.39917	65	1	1	345	1	1	1	91	304	363	1	110.9		1	1	28	1	1	1	1	4.85714	9.39917	0	65		1	4212	191	1	15	21	740.167	9.39917	0	65		1	1	352	126	120	9.39917	0	65		66	1	1	1350
9.4	144	136	283	415	275	195	444	341	334	372	144	293.9		151	284	1	404	119	270	1	175.714	9.4	0	144		138	234	168	93	118	62	135.5	9.4	-158.4	144		261	69	1	266	149.25	9.4	0	144		86	214	217	239
9.40083	168	1	224	425	323	264	355	300	405	478	162	293.7		150	321	1	426	209	274	176	222.429	9.40083	0	168		173	788	258	85	122	116	257	9.40083	0	168		298	146	156	209	202.25	9.40083	0	168		216	113	128	66
9.40167	175	1	1	1	1	1	1	1	1	1	1	1		1	1	1	1	1	1	8	2	9.40167	0	175		1	1	1	1	1	1	1	9.40167	#DIV/0!	175		1	1	277	1	70	9.40167	0	175		1	1	237	1
9.4025	162	1	134	1	1	1	39	1	8	1	1	18.8		1	1	1	1	1	118	1	17.7143	9.4025	0	162		1	572	1	1	36	1	102	9.4025	0	162		1	1	1	25	7	9.4025	0	162		1	80	1	17
9.40333	146	384	242	325	1	168	327	1	312	140	289	218.9		76	345	118	1	71	416	88	159.286	9.40333	0	146		81	1131	1	1	183	1	233	9.40333	0	146		512	1	185	59	189.25	9.40333	0	146		1	399	159	646
9.40417	164	1	178	1	1	1	56	1	7	7	27	28		1	1	1	1	1	104	25	19.1429	9.40417	0	164		1	872	1	1	1	1	146.167	9.40417	0	164		148	1	1	1	37.75	9.40417	0	164		1	106	1	14
9.405	158	1	60	1	1	43	1	58	1	1	1	16.8		1	1	1	90	10	1	1	15	9.405	0	158		1	183	1	1	1	1	31.3333	9.405	0	158		1	3	1	1	1.5	9.405	0	158		1	29	1	63
9.40583	565	1	1	1	1	1	1	1	1	1	1	1		1	1	1	1	1	1	1	1	9.40583	#DIV/0!	565		1	1	1	1	1	1	1	9.40583	#DIV/0!	565		1	1	16	1	4.75	9.40583	0	565		1	1	1	1
9.40667	91	691	608	510	480	1	452	275	1	516	314	384.8		1	558	1	1	1	663	225	207.143	9.40667	0	91		237	798	1	1	291	149	246.167	9.40667	0	91		1	162	879	338	345	9.40667	0	91		1	352	412	653
9.4075	98	136	1	126	228	63	243	154	132	174	1	125.8		77	192	1	15	1	144	1	61.5714	9.4075	0	98		1	749	1	1	1	1	125.667	9.4075	0	98		1	45	16	80	35.5	9.4075	0	98		1	56	70	1394
9.40833	207	1	1	226	1	1	1	307	134	1	1	67.4		337	1	37	13	1	1	1	55.8571	9.40833	0	207		1	1	1	1	1	1	1	9.40833	0	207		1697	1	1	1	425	9.40833	0	207		1	1	1	223
9.40917	156	1	36	73	137	73	110	75	149	94	96	84.4		37	54	1	102	43	113	1	50.1429	9.40917	0	156		66	77	62	80	54	5	57.3333	9.40917	0	156		106	32	129	58	81.25	9.40917	0	156		1	64	51	1
9.41	105	674	1	581	513	208	1	1	1	1	1	198.2		210	1	1	152	1	1	345	101.571	9.41	0	105		1	1	1	1	1	189	32.3333	9.41	0	105		2767	1	1	1	692.5	9.41	0	105		48	1	1	518
9.41083	93	1323	1218	662	736	622	1	762	1021	750	548	764.3		357	1277	1	1438	551	1345	928	842.429	9.41083	0	93		597	12828	381	768	405	335	2552.33	9.41083	0	93		380	283	426	607	424	9.41083	0	93		1095	444	630	1476
9.41167	294	1	1	1	1	1	1	1	1	1	1	1		1	1	1	1	18	1	1	3.42857	9.41167	0	294		1	1	1	1	1	1	1	9.41167	#DIV/0!	294		1	1	1	1	1	9.41167	#DIV/0!	294		1	1	1	1
9.4125	118	4421	3975	3554	4469	1691	2791	2826	3512	2264	1950	3145.3		1372	3830	1	3800	2469	3801	1	2182	9.4125	0	118		2167	1	2074	2776	1218	1522	1626.33	9.4125	-1518.97	118		1	1701	5221	2323	2311.5	9.4125	0	118		3881	2607	2489	3000
9.41333	419	1	1	1	1	1	1	1	1	1	1	1		6	1	1	1	1	1	1	1.71429	9.41333	0	419		21	1	1	1	1	1	4.33333	9.41333	0	419		1	1	1	1	1	9.41333	#DIV/0!	419		1	1	1	1
9.41417	72	6831	5457	5028	4381	2348	3924	5389	4121	3302	2624	4340.5		1548	5232	10053	4490	6728	3876	3334	5037.29	9.41417	0	72		5576	1	2700	3559	2185	2371	2732	9.41417	0	72		4111	2589	6590	2539	3957.25	9.41417	0	72		4553	3546	1856	6377
9.415	101	5403	4835	3750	4607	1715	1	2882	3439	2340	2001	3097.3		1359	3888	2520	4180	2454	4140	1	2648.86	9.415	0	101		2122	1	2266	2990	2104	1429	1818.67	9.415	0	101		1943	1534	4998	2141	2654	9.415	0	101		4071	2924	2449	3537
9.41583	73	78083	93403	102056	112228	46677	59134	26056	96835	65373	34390	71423.5		38027	93631	1	94028	109949	131961	1	66799.7	9.41583	0	73		26663	1	43984	85625	80291	42169	46455.5	9.41583	0	73		74704	93758	1	83168	62907.8	9.41583	0	73		117476	86651	89320	82684
9.41667	143	589	523	487	529	156	367	332	353	300	152	378.8		149	457	56	476	289	460	1	269.714	9.41667	0	143		284	1	253	335	264	184	220.167	9.41667	-158.633	143		1	209	665	293	292	9.41667	0	143		538	314	322	1
9.4175	61	15037	12210	7902	15443	5231	9764	10611	10920	7230	6975	10132.3		4790	12980	1	13452	8861	12682	9387	8879	9.4175	0	61		7027	1	6828	10200	5566	4994	5769.33	9.4175	-4362.97	61		7182	5863	17619	7270	9483.5	9.4175	0	61		13075	6313	5676	10621
9.41833	75	90432	52621	71562	93136	30957	59126	57120	67377	44306	42724	60936.1		28289	80930	1	74726	51758	72217	39195	49588	9.41833	0	75		45439	70073	43669	63011	44883	29274	49391.5	9.41833	0	75		30629	29772	106051	41546	51999.5	9.41833	0	75		84468	47876	55771	70353
9.41917	132	5507	4725	5090	6530	2233	3708	3888	4451	2989	2555	4167.6		1978	5505	1	5542	3466	4179	3845	3502.29	9.41917	0	132		3133	2982	3290	4567	2930	2202	3184	9.41917	0	132		1803	2051	7156	3049	3514.75	9.41917	0	132		5973	3063	3484	4412
9.42	131	47205	38013	40898	53778	16783	30308	32216	34920	23878	21522	33952.1		14724	39629	1	45208	27453	34376	32511	27700.3	9.42	0	131		25388	24262	27488	37287	21562	17717	25617.3	9.42	0	131		12804	16228	58029	23877	27734.5	9.42	0	131		50481	24329	26794	37942
9.42083	103	4561	1929	2232	2658	1	2892	12969	15568	1	24113	6692.4		1	11967	55480	1	15700	21449	2251	15264.1	9.42083	0	103		2524	15092	1441	1	14204	1	5543.83	9.42083	0	103		38420	18447	14131	14399	21349.2	9.42083	14656.9	103		18088	10354	13616	1522
9.42167	222	317	401	1	1	1	1	5225	1	1	1	595		1	1	1	1	6403	1	1	915.571	9.42167	0	222		1	5917	341	1	5915	1	2029.33	9.42167	0	222		17177	8370	1	5957	7876.25	9.42167	7281.25	222		779	4424	6521	1
9.4225	199	1	1	1	54	1	1	1	1	1	1	6.3		1	1	1	1	1	1	1	1	9.4225	0	199		1	1	1	1	1	1	1	9.4225	0	199		1	1	17	1	5	9.4225	0	199		1	1	1	1
9.42333	64	1	13	1	291	1	1	1	1	1	1	31.2		1	1	184	1	1	1	1	27.1429	9.42333	0	64		14	202	1	143	30	1	65.1667	9.42333	0	64		1	1	1	61	16	9.42333	0	64		1	1	1	1312
9.42417	147	40913	1	1	34127	48123	1	43247	1	24291	58386	24909.1		23488	35828	1	20450	56035	96771	1	33224.9	9.42417	0	147		57524	1	31711	28889	12100	41612	28639.5	9.42417	0	147		60739	16690	42616	9758	32450.8	9.42417	0	147		40785	13759	1	8806
9.425	148	5340	4400	1	4726	1	1	2260	1	4249	1	2098		2400	1	1	4320	1	10512	9644	3839.86	9.425	0	148		7364	1	1129	1706	728	1934	2143.67	9.425	0	148		6823	1288	1	1125	2309.25	9.425	0	148		1	1663	1863	1085
9.42583	220	1	1	1	1	1	1	1	1	1	1	1		1	1	1	1	1	1	1	1	9.42583	#DIV/0!	220		1	1	1	1	1	1	1	9.42583	#DIV/0!	220		64	1	1	1	16.75	9.42583	0	220		1	25	1	1
9.4275	79	81076	1	1	1	1	1	1	1	14284	1	9536.8		1	84148	37619	1	1	1	1	17396	9.4275	0	79		461	9028	25560	1	1	10306	7559.5	9.4275	0	79		9791	1	1	1	2448.5	9.4275	0	79		1	1	1	1
9.42833	63	1	1	1557	511	1	1	1155	1510	1654	725	711.6		1	1591	1	1	1	1	1	228.143	9.42833	0	63		1	3644	1	1	436	1	680.667	9.42833	0	63		205	1	1248	1	363.75	9.42833	0	63		864	203	496	1
9.42917	66	1	2104	3728	1	1	1	1	2462	3854	1	1215.4		1	1	1	3058	1	1	1	437.714	9.42917	0	66		13574	1	726	1	1	1391	2615.67	9.42917	0	66		1	930	1	1	233.25	9.42917	0	66		1	1	1	1
9.43	88	1	1	1	1233	656	1	1	1	1	901	279.7		1	1375	306	1087	1	1	1	396	9.43	0	88		555	1	462	782	1076	477	558.833	9.43	0	88		1	1	1	1	1	9.43	0	88		895	1189	1550	1
9.43083	144	1	1	1	1	46	1	48	1	1	1	10.2		1	1	1	1	1	1	1	1	9.43083	0	144		1	1	1	1	1	1	1	9.43083	0	144		1	1	324	1	81.75	9.43083	0	144		1	1	1	1
9.43167	373	1	1	1	1	1	1	1	1	1	1	1		1	1	1	20	1	1	1	3.71429	9.43167	0	373		27	1	1	1	1	1	5.33333	9.43167	0	373		1	1	22	1	6.25	9.43167	0	373		1	1	1	1
9.4325	149	4153	2613	3253	2684	1555	1758	3684	2995	3022	2385	2810.2		1929	4134	6127	1422	5043	8300	917	3981.71	9.4325	0	149		406	1	1213	952	1442	1214	871.333	9.4325	-1938.87	149		2713	347	2861	2124	2011.25	9.4325	0	149		2527	1672	4135	1498
9.43333	78	1	1	1	1	1	1	43	1	1	1	5.2		1	1	1	1	1	1	1	1	9.43333	0	78		1	1	1	1	1	1	1	9.43333	0	78		1	1	1	1	1	9.43333	0	78		1	1	1	1
9.43417	146	1	1	1	219	117	210	1	1	1	1	55.3		1	1	1	202	166	279	1	93	9.43417	0	146		116	1	83	91	1	99	65.1667	9.43417	0	146		1	1	496	195	173.25	9.43417	0	146		96	1	210	1
9.435	70	1	1	1755	1681	1	1	1	1	998	1	444.1		1	1	20	1	548	1	421	141.857	9.435	0	70		414	1	2953	1848	290	668	1029	9.435	0	70		1	357	1963	1	580.5	9.435	0	70		903	1	1	13513
9.43583	245	1	1	1	1	1	1	1	1	1	1	1		1	1	1	1	1	1	1	1	9.43583	#DIV/0!	245		1	1	1	1	1	1	1	9.43583	#DIV/0!	245		21	11	1	16	12.25	9.43583	11.25	245		1	4	1	1
9.43667	84	1	281	666	458	1	1	1	1	560	1	197.1		1	1	1	532	1	1	1	76.8571	9.43667	0	84		1	1	1800	1	1	482	381	9.43667	0	84		1	1	296	91	97.25	9.43667	0	84		1	1	9	1
9.4375	77	1	1	12811	1	1	10618	10150	12317	11813	5807	6352		4406	12978	1	1	4430	14451	4490	5822.43	9.4375	0	77		4164	1	3666	1	1	1	1305.67	9.4375	0	77		1	1	13148	6174	4831	9.4375	0	77		6186	1	5178	8317
9.43833	95	1	858	705	629	452	1	1	1	520	1	316.9		376	1	21	707	1	1	1	158.286	9.43833	0	95		339	4321	412	429	1789	435	1287.5	9.43833	0	95		1	1	1	1	1	9.43833	0	95		1	1363	1865	736
9.43917	145	1	108	109	188	1	58	1	209	1	184	86		8	116	1	60	1	1	1	26.8571	9.43917	0	145		65	244	72	103	290	1	129.167	9.43917	0	145		692	1	409	200	325.5	9.43917	239.5	145		1	185	327	117
9.44	188	1	25	1	1	1	1	1	1	1	1	3.4		1	1	58	41	1	1	1	14.8571	9.44	0	188		1	1	1	1	1	1	1	9.44	0	188		106	1	1	1	27.25	9.44	0	188		1	1	1	1
9.44083	80	1	1	1	476	1	1	1	1	70	1	55.4		87	1	19	1	1	1	1	15.8571	9.44083	0	80		1	1	1	1	430	1	72.5	9.44083	0	80		1518	1	1	54	393.5	9.44083	0	80		272	1	1	1
9.44167	340	1	1	1	1	1	1	1	1	1	1	1		1	1	1	1	1	1	1	1	9.44167	#DIV/0!	340		1	24	1	1	1	1	4.83333	9.44167	0	340		1	3	1	1	1.5	9.44167	0	340		1	1	1	1
9.4425	175	1	94	127	132	1	1	241	1	79	1	67.8		54	161	1	66	1	1	1	40.7143	9.4425	0	175		6	1	1	1	244	52	50.8333	9.4425	0	175		1	1	1	1	1	9.4425	0	175		1	183	286	8
9.44333	208	1	1	1	1	1	1	82	1	42	190	32.1		1	97	418	1	118	1	1	91	9.44333	0	208		1	85	1	1	13	22	20.5	9.44333	0	208		350	150	1	29	132.5	9.44333	0	208		1	59	96	1
9.44417	152	32	290	225	233	1	1	1	192	1	157	113.3		124	1	290	1	282	415	269	197.429	9.44417	0	152		1	1	1	1	126	152	47	9.44417	0	152		1	107	204	124	109	9.44417	0	152		1	1	175	1
9.445	228	1	1	18	1	1	1	1	1	1	1	2.7		1	18	1	1	15	1	1	5.42857	9.445	0	228		1	1	1	1	1	1	1	9.445	0	228		1	1	1	4	1.75	9.445	0	228		1	1	1	1
9.44583	240	1	44	1	1	1	1	64	61	46	1	22.1		1	27	1	1	77	1	1	15.5714	9.44583	0	240		1	1	1	1	1	1	1	9.44583	0	240		1	64	1	1	16.75	9.44583	0	240		1	1	1	1
9.44667	265	1	47	60	1	1	1	505	638	1	1073	232.8		1	479	2437	1	660	886	38	643.143	9.44667	0	265		1	572	1	17	586	1	196.333	9.44667	0	265		1941	837	377	608	940.75	9.44667	707.95	265		1	450	627	24
9.4475	223	1	207	1	1	1	1	2734	3399	1	5576	1192.2		1	2498	12707	1	3317	4630	1	3307.86	9.4475	0	223		1	3110	1	1	3172	1	1047.67	9.4475	0	223		9501	4500	2853	3114	4992	9.4475	3799.8	223		3867	2335	3459	1
9.44833	224	1	9	47	19	1	1	418	498	1	853	184.8		1	384	2003	1	541	703	1	519.143	9.44833	0	224		9	455	1	1	483	1	158.333	9.44833	0	224		1545	677	293	471	746.5	9.44833	561.7	224		571	340	516	1
9.44917	92	25	1	17	1	1	1	1	1	1	1	5		1	40	1	129	1	49	1	31.7143	9.44917	0	92		1	1	1	1	12	1	2.83333	9.44917	0	92		1	1	1	1	1	9.44917	0	92		1	20	1	60
9.45	268	1	1	1	1	1	1	1	1	1	25	3.4		1	1	1	1	1	1	1	1	9.45	0	268		1	1	1	1	16	1	3.5	9.45	0	268		49	1	1	1	13	9.45	0	268		1	1	18	1
9.45083	137	1	1	33	1	1	1	1	1	44	21	10.5		1	1	187	1	1	1	1	27.5714	9.45083	0	137		35	1	1	1	1	1	6.66667	9.45083	0	137		1	1	48	1	12.75	9.45083	0	137		1	1	4	26
9.45167	135	1	167	209	162	1	1	605	733	1	1158	303.8		141	533	2782	1	745	950	1	736.143	9.45167	0	135		1	787	38	1	700	114	273.5	9.45167	0	135		2031	916	654	633	1058.5	9.45167	754.7	135		672	542	759	38
9.4525	163	1	1	1	1	1	1	209	1	1	436	65.3		1	1	1077	1	243	339	1	237.571	9.4525	0	163		1	209	1	1	230	1	73.8333	9.4525	0	163		714	325	236	234	377.25	9.4525	311.95	163		43	161	269	1
9.45333	119	1	1	1	1	1	1	1	780	1	2363	315.1		1	1255	5752	1	1626	2161	1	1542.43	9.45333	0	119		1	1	1	1	1	1	1	9.45333	0	119		3982	1909	2761	1310	2490.5	9.45333	2175.4	119		1666	1	1	1
9.45417	91	39	1	1	1	1	1	1	1	1	1	4.8		1	1	433	1	130	193	496	179.286	9.45417	174.486	91		1	1	1	1	1	1	1	9.45417	0	91		1	1	1	26	7.25	9.45417	0	91		1	1	151	1
9.455	78	1	214	102	1	462	1	127	1	253	1	116.3		1	1	192	1	1	1	1	28.2857	9.455	0	78		1	1	233	1	1	1	39.6667	9.455	0	78		135	1	1439	1	394	9.455	0	78		364	26	1	1
9.45583	570	1	22	1	1	1	1	1	1	1	1	3.1		1	1	1	1	1	1	1	1	9.45583	0	570		1	1	1	1	1	1	1	9.45583	0	570		1	11	1	1	3.5	9.45583	0	570		1	1	1	22
9.45667	73	1	1	1	1	1	1	1	68095	1	70434	13853.7		1	35877	258473	1	1	107076	1	57347.1	9.45667	0	73		1	1	1	1	1	1	1	9.45667	0	73		92429	1	169393	1	65456	9.45667	0	73		92627	1	1	1
9.4575	160	1	1	1	1	1	1	1	1	1	47	5.6		1	1	137	1	1	50	6	28.1429	9.4575	0	160		1	1	1	1	41	1	7.66667	9.4575	0	160		126	7	1	1	33.75	9.4575	0	160		1	29	1	15
9.45833	278	1	1	1	64	1	1	12	17	1	1	10		1	17	1	1	24	1	1	6.57143	9.45833	0	278		1	1	1	1	1	1	1	9.45833	0	278		1	1	1	1	1	9.45833	0	278		1	1	1	1
9.45917	151	1	112	91	1	1	1	8	10	5	57	28.7		1	58	777	1	1	1	1	120	9.45917	0	151		1	1	1	1	104	1	18.1667	9.45917	0	151		233	71	101	11	104	9.45917	0	151		1	34	8	1
9.46	210	1	550	295	312	329	336	140	305	236	166	267		156	288	398	452	1	218	519	290.286	9.46	0	210		1	98	195	299	94	258	157.5	9.46	0	210		71	1	285	127	121	9.46	0	210		1	106	91	1231
9.46083	66	1	1	1	1692	2226	1	1351	1	1	1	527.6		1	1496	1	1	10233	1	1	1676.29	9.46083	0	66		1	1	616	1	1	1	103.5	9.46083	0	66		3703	1	1	1	926.5	9.46083	0	66		1	1	1	1
9.46167	71	1	5219	1	1	1	1	1033	492	1	1	675.1		1	744	5247	14127	732	1	1	2979	9.46167	0	71		807	1	8930	6350	1	1	2681.67	9.46167	0	71		1832	751	1	1	646.25	9.46167	0	71		748	1	1	1
9.4625	84	1	1116	1	1	1	1	1	1	1	1	112.5		82	1	707	2774	1	1	407	567.571	9.4625	0	84		129	1	1	1284	1	59	245.833	9.4625	0	84		231	7	1	1	60	9.4625	0	84		31	1	1	102
9.46333	118	1	1	1	1	1	1	1	1	1	738	74.7		275	1	1864	1	1	1	1	306.286	9.46333	0	118		1	1	1	349	1	1	59	9.46333	0	118		1717	1	1	1	430	9.46333	0	118		1	1	1	23
9.46417	148	1	1	1	1	1	2840	1	1	1	7630	1047.8		1	4081	7692	1	635	1	1	1773.14	9.46417	0	148		1	12754	1	1308	1	1	2344.33	9.46417	0	148		7455	1	5888	1	3336.25	9.46417	0	148		1	1	1	1
9.465	61	1	1	1	1	1	1	1	1	1	3704	371.3		1	1	9817	1	1	1	1	1403.29	9.465	0	61		1	1	1	1	1	1	1	9.465	0	61		1	1	1	1	1	9.465	0	61		1	1	1	1
9.46583	70	1	1	1	371	1	1	1	1	1	1	38		1	1	5279	4278	1	1	1	1366	9.46583	0	70		1	1	1	1	1	1	1	9.46583	0	70		518	1	1	129	162.25	9.46583	0	70		1	1	1	1
9.46667	107	1	69	1	1	1	1	1	1	60	117	25.3		1	14	493	1	1	228	1	105.571	9.46667	0	107		19	146	70	26	1	1	43.8333	9.46667	0	107		299	142	91	67	149.75	9.46667	124.45	107		332	81	19	1
9.4675	74	1	1	1	1	1	1	1	1	1	7898	790.7		1	5040	24700	1	1	8164	1	5415.43	9.4675	0	74		1	1	1	1	1	1	1	9.4675	0	74		15088	1	1	5144	5058.5	9.4675	0	74		9823	1	1	1
9.46833	222	1	1	1	1	1	1	1	6484	1	10243	1673.5		1	4875	23345	1	1	8571	1	5256.43	9.46833	0	222		1	1	1	1	1	1	1	9.46833	0	222		1	1	5474	1	1369.25	9.46833	0	222		7690	1	1	1
9.46917	221	1	1928	1	1	1	1	22031	27098	1	42579	9364.2		1	20980	97708	1	27304	35719	1	25959.1	9.46917	0	221		1	24607	1	1	24570	1	8196.83	9.46917	0	221		70969	34911	23657	25332	38717.2	9.46917	29353	221		35297	18574	27157	1
9.47	207	1	368	280	184	1	1	655	568	1	1023	308.2		653	243	2381	1	642	1138	1	722.714	9.47	0	207		66	643	1	96	616	1	237.167	9.47	0	207		2031	840	889	644	1101	9.47	792.8	207		553	490	693	1
9.47083	147	1	1	1	25948	1	1	1	1	1	1	2595.7		1	1	77041	1	1	1	1	11006.7	9.47083	0	147		1	1	1	1	1	1	1	9.47083	0	147		1	1	1	1	1	9.47083	0	147		1	1	1	1
9.47167	89	1724	1	280	1747	1	1	1769	1	1	1	552.6		1	1	6398	1	1723	1	5536	1951.57	9.47167	0	89		1	1	1	1	1	1	1	9.47167	0	89		3963	1926	1	1849	1934.75	9.47167	0	89		1814	1	1	1
9.4725	85	278	2934	1	1	1	1	1	1	1	1	322		1	315	3333	7782	1	1	2820	2036.14	9.4725	0	85		397	1	1	3356	1	1	626.167	9.4725	0	85		1572	631	288	448	734.75	9.4725	0	85		403	1	1	1052
9.47333	130	170	1	1	1	1	1	1	1	74	1	25.2		1	1	108	1	155	1	10	39.5714	9.47333	0	130		1	1	1	1	1	1	1	9.47333	0	130		128	1	1223	1	338.25	9.47333	0	130		1	1	99	1
9.47417	192	1	176	163	84	86	164	201	174	83	1	113.3		1	191	932	1	234	347	1	243.857	9.47417	0	192		88	1	1	1	194	1	47.6667	9.47417	0	192		543	214	229	162	287	9.47417	173.7	192		1	189	166	195
9.475	98	1	194	1	1	1	1	1	198	1	1	40		1	1	69	152	1	1	1	32.2857	9.475	0	98		1	1	186	1	1	1	31.8333	9.475	0	98		153	1	194	1	87.25	9.475	0	98		1	1	1	1
9.47583	131	1	1	1	1	1	1	1	1	1	1	1		1	1	10565	1	1	1	1	1510.14	9.47583	0	131		1	1	1	1	1	1	1	9.47583	#DIV/0!	131		1	1	1	1	1	9.47583	#DIV/0!	131		1	1	1	1
9.47667	165	1	1	58	1	90	1	1	1	1	127	28.2		1	1	275	1	19	102	6	57.8571	9.47667	0	165		1	1	55	1	1	1	10	9.47667	0	165		210	80	93	1	96	9.47667	0	165		1	58	70	1
9.4775	164	1	1	10	1	29	42	1	59	1	108	25.3		1	53	225	1	59	82	1	60.2857	9.4775	0	164		1	75	1	1	1	50	21.5	9.4775	0	164		229	69	37	54	97.25	9.4775	71.95	164		59	1	64	1
9.47833	69	1314	2475	1	678	779	1	1	777	1	1	602.8		1	1	1	4095	1	1510	2038	1092.43	9.47833	0	69		616	2587	212	781	239	1	739.333	9.47833	0	69		398	523	1	658	395	9.47833	0	69		1	469	1	1
9.47917	78	1	1	1	1	1	1	1	1	1	1	1		1	1	1	1	1	1	1	1	9.47917	#DIV/0!	78		1	1	1	1	1	1	1	9.47917	#DIV/0!	78		1	1	1053	1	264	9.47917	0	78		1	1	1	1
9.48083	515	1	1	1	1	1	1	1	1	18	1	2.7		1	1	1	1	1	1	1	1	9.48083	0	515		1	1	1	1	1	1	1	9.48083	0	515		11	1	1	1	3.5	9.48083	0	515		1	1	1	1
9.48167	286	1	47	1	1	25	32	24	25	38	31	22.5		1	48	97	1	1	34	38	31.4286	9.48167	0	286		1	16	1	1	3	24	7.66667	9.48167	0	286		1	1	1	1	1	9.48167	-21.5	286		1	1	1	83
9.4825	530	1	1	1	1	1	1	1	1	9	1	1.8		1	1	1	1	1	1	1	1	9.4825	0	530		17	1	1	1	1	1	3.66667	9.4825	0	530		1	1	1	1	1	9.4825	0	530		1	1	1	1
9.48333	292	1	1	1	1	1	1	1	1	1	1	1		1	1	1	1	1	1	12	2.57143	9.48333	0	292		1	1	1	1	1	1	1	9.48333	#DIV/0!	292		1	1	1	1	1	9.48333	#DIV/0!	292		1	1	1	1
9.48417	154	1	225	268	1	469	1	1	1	1	1	96.9		327	358	86	1	1	1	1	110.714	9.48417	0	154		1	1	1	1	1	1	1	9.48417	0	154		1	708	1075	1	446.25	9.48417	0	154		1	1	724	1
9.485	381	1	1	18	1	1	1	1	1	1	1	2.7		1	1	1	1	1	1	1	1	9.485	0	381		1	73	1	1	2	1	13.1667	9.485	0	381		1	1	10	1	3.25	9.485	0	381		1	1	1	1
9.48583	580	1	1	1	1	1	1	1	1	13	1	2.2		1	1	1	1	1	1	1	1	9.48583	0	580		1	1	1	1	1	1	1	9.48583	0	580		1	1	1	1	1	9.48583	0	580		1	1	1	1
9.48667	485	1	1	1	22	1	1	1	1	1	1	3.1		1	1	1	1	1	1	1	1	9.48667	0	485		1	1	1	1	1	1	1	9.48667	0	485		1	1	1	18	5.25	9.48667	0	485		1	1	1	1
9.48833	180	1	1	1	1	1	1	1	1	1	1	1		1	1	1	1	1	1	48	7.71429	9.48833	0	180		1	1	1	1	1	1	1	9.48833	#DIV/0!	180		1	1	1	1	1	9.48833	#DIV/0!	180		1	1	1	1
9.48917	285	1	233	133	28	148	123	107	141	182	156	125.2		45	197	381	241	71	219	239	199	9.48917	0	285		134	51	83	154	71	146	106.5	9.48917	0	285		89	6	118	102	78.75	9.48917	0	285		107	56	78	384
9.49	99	66	1	92	27	171	196	162	320	199	450	168.4		205	188	1	26	117	397	309	177.571	9.49	0	99		168	363	82	171	187	9	163.333	9.49	0	99		567	230	155	162	278.5	9.49	0	99		36	224	199	1577
9.49083	446	1	1	1	1	1	1	1	1	1	1	1		1	1	1	1	1	1	11	2.42857	9.49083	0	446		1	17	1	1	10	1	5.16667	9.49083	0	446		1	1	1	1	1	9.49083	#DIV/0!	446		1	1	1	1
9.49167	565	1	1	1	1	1	1	1	1	1	1	1		1	1	1	1	1	1	1	1	9.49167	#DIV/0!	565		1	1	1	1	1	1	1	9.49167	#DIV/0!	565		1	1	10	1	3.25	9.49167	0	565		1	1	1	1
9.4925	351	1	1	19	1	1	1	1	1	1	1	2.8		1	1	14	1	1	1	1	2.85714	9.4925	0	351		1	1	1	1	1	1	1	9.4925	0	351		1	1	1	1	1	9.4925	0	351		1	1	1	1
9.49333	209	1	155	147	145	206	120	215	283	228	405	190.5		141	163	1	143	181	404	217	178.571	9.49333	0	209		282	228	123	246	232	242	225.5	9.49333	0	209		515	206	42	208	242.75	9.49333	0	209		1	170	277	427
9.49417	110	1	1	1	1	31	1	1	1	1	82	12.1		1	1	1	1	1	1	14	2.85714	9.49417	0	110		1	1	1	1	1	1	1	9.49417	0	110		1	1	57	1	15	9.49417	0	110		1	1	1	1
9.495	300	1	160	96	83	5	34	54	62	87	55	63.7		5	98	92	174	60	53	85	81	9.495	0	300		54	71	55	64	39	47	55	9.495	0	300		35	15	36	40	31.5	9.495	0	300		1	41	37	172
9.49583	534	1	15	1	1	1	1	1	1	1	1	2.4		1	1	1	1	1	1	1	1	9.49583	0	534		1	1	1	1	1	1	1	9.49583	0	534		5	1	1	1	2	9.49583	0	534		1	1	1	1
9.49667	284	1	184	148	98	53	71	68	77	124	56	88		32	123	145	227	66	64	103	108.571	9.49667	0	284		45	102	73	1	40	74	55.8333	9.49667	0	284		46	1	15	59	30.25	9.49667	0	284		1	56	44	239
9.4975	256	1	33	48	1	20	38	29	43	50	11	27.4		21	1	1	1	31	25	1	11.5714	9.4975	0	256		1	1	1	1	15	8	4.5	9.4975	-22.9	256		31	19	1	1	13	9.4975	0	256		1	1	21	49
9.49833	301	1	1	1	1	1	1	1	1	1	1	1		1	1	1	1	1	1	1	1	9.49833	#DIV/0!	301		1	1	1	1	1	1	1	9.49833	#DIV/0!	301		1	1	1	1	1	9.49833	#DIV/0!	301		1	1	1	1
9.49917	234	1	1	1	1	1	1	1	1	1	1	1		1	1	1	1	1	26	1	4.57143	9.49917	0	234		1	1	1	1	1	1	1	9.49917	#DIV/0!	234		24	1	1	1	6.75	9.49917	0	234		1	1	1	1
9.5	190	3647	4611	3388	3672	3436	3570	3720	4396	3419	4155	3801.4		2877	2870	1	3320	3187	5501	5390	3306.57	9.5	0	190		3766	3020	2579	4001	2894	3990	3375	9.5	0	190		5693	3214	4106	3233	4061.5	9.5	0	190		3886	3078	3144	5721
9.50083	67	1	1	1429	1140	1989	1249	2939	2214	1889	2798	1564.9		1252	1	153	1706	2595	3711	2002	1631.43	9.50083	0	67		2718	1511	881	1841	1622	2219	1798.67	9.50083	0	67		2941	2049	2499	1548	2259.25	9.50083	0	67		1607	1529	1865	4560
9.50167	75	1	1	1	1	1	1	1	1	1	1	1		1	1	38679	1	1	1	30357	9863	9.50167	0	75		1	1	1	1	1	1	1	9.50167	#DIV/0!	75		1	1	1	1	1	9.50167	#DIV/0!	75		1	1	1	1
9.5025	70	4200	4836	3723	3777	3398	1	2682	1	3460	3172	2925		2949	2519	1	3728	3345	4646	5405	3227.57	9.5025	0	70		3836	2311	2455	3602	2090	3783	3012.83	9.5025	0	70		3751	2940	4517	3060	3567	9.5025	0	70		3855	2912	2493	9056
9.50333	238	1	1	1	1	17	1	29	1	1	49	10.2		1	1	1	1	1	35	21	8.71429	9.50333	0	238		1	1	1	1	16	29	8.16667	9.50333	0	238		55	19	39	1	28.5	9.50333	0	238		1	25	40	42
9.50417	268	1	36	39	1	70	43	54	61	61	128	49.4		7	37	1	1	40	112	57	36.4286	9.50417	0	268		59	79	63	1	71	62	55.8333	9.50417	0	268		171	61	91	66	97.25	9.50417	0	268		1	58	62	87
9.505	267	1	214	212	224	340	223	350	414	342	739	305.9		236	275	1	226	279	735	316	295.429	9.505	0	267		440	456	231	369	401	382	379.833	9.505	0	267		1036	362	416	313	531.75	9.505	0	267		270	323	424	664
9.50583	66	11951	8518	8796	7292	9999	5919	9206	9191	10947	9569	9138.8		6170	5999	1	9022	16520	1	22299	8573.14	9.50583	0	66		9241	12209	5204	1	5444	8970	6844.83	9.50583	0	66		11810	7148	1	1	4740	9.50583	-4398.8	66		8316	4331	1	10935
9.50667	76	1768	1672	1327	1289	2325	1625	2165	2213	2205	3320	1990.9		1541	1723	1	2041	1905	3035	2289	1790.71	9.50667	0	76		2659	2361	1281	2135	1	2542	1829.83	9.50667	0	76		4307	2213	2654	1839	2753.25	9.50667	0	76		1840	1839	2462	3546
9.5075	147	61142	40080	11699	46451	79764	18086	75836	100830	54293	111677	59985.8		44778	57704	1	42052	82128	157214	93282	68165.6	9.5075	0	147		99870	31389	53017	58088	38850	78161	59895.8	9.5075	0	147		124626	45903	68511	35920	68740	9.5075	0	147		71944	34064	1	60793
9.50833	101	2153	2434	2056	1910	2440	1	2771	3019	2502	3819	2310.5		1726	2063	1	2092	2095	4851	3140	2281.14	9.50833	0	101		2885	4332	1544	2346	2358	2508	2662.17	9.50833	0	101		4949	2396	2964	2088	3099.25	9.50833	0	101		2213	2193	2428	4514
9.50917	117	9022	6013	7011	8506	9802	4281	7624	12263	10332	18052	9290.6		6477	8755	1	8694	9432	19036	8838	8747.57	9.50917	0	117		13266	10071	6116	10505	10126	9507	9931.83	9.50917	0	117		23679	10558	12195	9023	13863.8	9.50917	0	117		10301	8084	11842	17896
9.51	73	170385	189455	188898	177491	299722	164766	238235	345670	313435	495971	258403		203801	220141	1	209152	263333	535650	266178	242608	9.51	0	73		339126	282584	167452	322280	293295	325762	288416	9.51	0	73		568774	308250	341561	256260	368711	9.51	0	73		280077	251762	308703	546911
9.51083	189	4087	4110	3854	4017	6391	4285	6635	8126	6853	12657	6101.5		4335	5384	1	4481	5397	12731	5610	5419.86	9.51083	0	189		8294	7106	4029	7131	7274	7158	6832	9.51083	0	189		16179	7081	7533	5796	9147.25	9.51083	0	189		6251	5669	7605	12129
9.51167	79	82594	1	1	1	1	1	41152	1	20580	9795	15412.7		1	84443	42377	1	4443	55081	1	26621	9.51167	0	79		1	1	1	1	14221	15362	4931.17	9.51167	0	79		15011	2733	1	1	4436.5	9.51167	0	79		1	1	1	1
9.5125	129	393	380	414	222	431	342	390	718	517	824	463.1		319	272	28	247	394	967	409	376.571	9.5125	0	129		397	1577	126	464	544	467	595.833	9.5125	0	129		1040	409	617	240	576.5	9.5125	0	129		442	441	476	903
9.51333	77	4957	4228	4350	1165	3102	2190	6440	3785	2152	3127	3549.6		2651	4650	1	3247	4382	9251	2902	3869.14	9.51333	0	77		3363	1369	1803	2374	1	3491	2066.83	9.51333	0	77		5362	2821	6404	2780	4341.75	9.51333	0	77		3451	1	3160	7038
9.51417	83	54	1	143	1	366	1	793	1088	758	1408	461.3		537	754	1	112	331	1	247	283.286	9.51417	0	83		423	2018	78	1	486	617	603.833	9.51417	0	83		1444	470	658	455	756.75	9.51417	0	83		407	1	483	3044
9.515	120	420	487	633	729	909	511	786	909	911	1513	780.8		640	410	1	698	760	1527	1	576.714	9.515	0	120		1201	880	571	738	922	925	872.833	9.515	0	120		2149	995	938	1	1020.75	9.515	0	120		689	779	928	1609
9.51583	240	1	902	723	562	528	486	572	439	503	361	507.7		737	681	1	577	1333	542	852	674.714	9.51583	0	240		621	271	742	752	438	801	604.167	9.51583	0	240		1033	610	571	737	737.75	9.51583	0	240		1028	472	566	896
9.51667	78	487	496	298	371	1	350	857	267	539	546	421.2		360	1	1	1287	563	991	29	461.714	9.51667	0	78		87	2878	1	454	512	427	726.5	9.51667	0	78		504	522	1035	593	663.5	9.51667	0	78		555	443	1	974
9.5175	201	1	1	1	1	27	1	25	1	1	52	11.1		24	1	1	1	1	50	1	11.2857	9.5175	0	201		39	35	1	1	1	27	17.3333	9.5175	0	201		57	9	23	1	22.5	9.5175	0	201		1	27	33	61
9.51833	94	1	1	1	1	13	49	8	68	1	1	14.4		8	29	17	1	12	78	1	20.8571	9.51833	0	94		1	38	1	1	57	42	23.3333	9.51833	0	94		47	5	48	1	25.25	9.51833	0	94		1	50	7	1
9.51917	392	1	1	1	1	1	1	1	1	1	1	1		1	1	30	1	1	1	1	5.14286	9.51917	0	392		1	1	1	1	1	1	1	9.51917	#DIV/0!	392		1	1	1	1	1	9.51917	#DIV/0!	392		1	1	1	1
9.52	334	1	58	46	1	17	1	39	1	18	1	18.3		40	1	1	1	84	1	47	25	9.52	0	334		31	1	44	1	24	41	23.6667	9.52	0	334		62	27	12	37	34.5	9.52	0	334		69	24	40	65
9.52083	65	1	75	140	41	189	1	286	84	107	183	110.7		92	172	286	221	193	1	82	149.571	9.52083	0	65		273	1	19	32	148	217	115	9.52083	0	65		229	133	282	210	213.5	9.52083	0	65		66	86	129	677
9.52167	79	1	1	1	1	1	1	1	1	1	12085	1209.4		1	1	1	1	1	58762	1	8395.43	9.52167	0	79		2348	1	30996	1	1	1	5558	9.52167	0	79		1	1	9172	1	2293.75	9.52167	0	79		1	1	1	1
9.5225	170	84	70	1	306	37	71	114	78	135	220	111.6		93	1	1	149	216	242	13	102.143	9.5225	0	170		143	36	140	1	34	174	88	9.5225	0	170		449	95	163	1	177	9.5225	0	170		250	213	115	498
9.52333	171	16	54	1	93	81	8	1	137	75	177	64.3		112	59	72	1	11	186	1	63.1429	9.52333	0	171		88	101	51	1	1	1	40.5	9.52333	0	171		41	1	98	72	53	9.52333	0	171		1	1	89	249
9.52417	98	1	379	207	1	73	348	218	554	347	492	262		337	285	80	1	12	316	15	149.429	9.52417	0	98		1	413	13	1	44	302	129	9.52417	0	98		452	150	158	202	240.5	9.52417	0	98		1	361	56	732
9.52583	318	1	1	25	1	1	28	19	1	48	1	12.6		1	36	80	1	49	27	1	27.8571	9.52583	0	318		1	1	81	1	3	24	18.5	9.52583	0	318		1	1	1	19	5.5	9.52583	0	318		1	1	45	1
9.52667	186	1	1	58	1	1	1	38	1	1	2	10.5		41	1	1	1	90	1	53	26.8571	9.52667	0	186		53	1	57	44	2	44	33.5	9.52667	0	186		32	38	57	63	47.5	9.52667	37	186		109	37	50	1
9.5275	465	1	19	1	1	1	1	1	1	1	1	2.8		1	1	1	1	1	1	1	1	9.5275	0	465		1	1	1	1	11	1	2.66667	9.5275	0	465		1	1	1	1	1	9.5275	0	465		1	1	16	1
9.52833	220	1	46	49	1	53	1	64	81	63	126	48.5		40	35	1	1	1	150	58	40.8571	9.52833	0	220		81	84	4	1	68	66	50.6667	9.52833	0	220		190	68	60	67	96.25	9.52833	0	220		63	69	80	122
9.52917	432	1	1	1	1	1	1	1	1	1	1	1		1	1	1	1	1	9	1	2.14286	9.52917	0	432		1	1	1	1	1	1	1	9.52917	#DIV/0!	432		1	1	1	1	1	9.52917	#DIV/0!	432		1	1	1	1
9.53	297	1	1	1	1	1	1	1	1	1	1	1		1	1	1	1	1	1	1	1	9.53	#DIV/0!	297		1	1	1	1	1	1	1	9.53	#DIV/0!	297		1	1	1	1	1	9.53	#DIV/0!	297		1	1	1	1
9.53083	353	1	1	1	1	1	1	1	1	1	1	1		1	1	1	1	1	1	1	1	9.53083	#DIV/0!	353		1	1	6	30	1	1	6.66667	9.53083	0	353		1	1	1	1	1	9.53083	#DIV/0!	353		1	1	1	1
9.53167	348	1	1	1	1	1	1	1	1	1	1	1		1	1	1	1	1	1	1	1	9.53167	#DIV/0!	348		1	1	1	1	1	1	1	9.53167	#DIV/0!	348		1	1	1	1	1	9.53167	#DIV/0!	348		1	1	1	1
9.53333	139	1	65	1	1	94	10	83	81	79	116	53.1		62	68	1	1	101	112	79	60.5714	9.53333	0	139		82	68	15	52	90	89	66	9.53333	0	139		178	75	1	1	63.75	9.53333	0	139		1	43	52	126
9.53417	128	1	55	1	1	1	171	220	90	45	75	66		97	9	1	1	1	367	1	68.1429	9.53417	0	128		45	1	15	12	1	1	12.5	9.53417	0	128		34	1	1	67	25.75	9.53417	0	128		90	1	1	241
9.535	168	1	65	36	1	81	49	90	103	68	122	61.6		89	1	51	1	116	142	116	73.7143	9.535	0	168		80	48	53	1	89	98	61.5	9.535	0	168		148	66	78	5	74.25	9.535	0	168		1	92	88	81
9.5375	254	1	1	1	19	43	50	35	53	50	40	29.3		33	49	106	1	58	74	63	54.8571	9.5375	0	254		1	35	1	114	40	37	38	9.5375	0	254		68	29	50	63	52.5	9.5375	0	254		129	44	46	39
9.53833	122	1	8	1	1	8	1	48	37	54	77	23.6		49	1	1	1	9	89	1	21.5714	9.53833	0	122		68	7	13	1	45	85	36.5	9.53833	0	122		128	4	1	1	33.5	9.53833	0	122		12	47	58	1
9.53917	173	1	74	189	1	130	311	192	536	354	574	236.2		276	384	1	100	1	200	172	162	9.53917	0	173		1	1367	220	103	115	229	339.167	9.53917	0	173		403	147	99	109	189.5	9.53917	0	173		1	370	159	195
9.54	80	1	2308	1	1440	2179	1521	1	2798	2003	2298	1455		1	2619	2200	1	1	4431	1814	1581	9.54	0	80		2579	1999	1223	2201	1126	1	1521.5	9.54	0	80		1586	1	2866	1	1113.5	9.54	0	80		1874	1111	1164	6093
9.54083	219	1	1	1	1	6	4	39	33	6	68	16		1	1	1	1	1	77	16	14	9.54083	0	219		62	73	1	1	29	7	28.8333	9.54083	0	219		90	30	26	6	38	9.54083	0	219		1	36	1	10
9.54167	498	1	1	1	1	1	1	1	1	1	1	1		1	1	1	1	1	1	1	1	9.54167	#DIV/0!	498		1	1	21	1	1	1	4.33333	9.54167	0	498		1	1	1	1	1	9.54167	#DIV/0!	498		1	1	1	1
9.5425	239	1	24	1	1	17	25	30	1	1	45	14.6		1	1	51	1	38	57	28	25.2857	9.5425	0	239		1	34	14	21	29	27	21	9.5425	0	239		76	22	58	50	51.5	9.5425	36.9	239		1	28	56	58
9.54333	84	1	1	179	155	1	190	271	394	1	1	119.4		1	1	1	258	1	1	1	37.7143	9.54333	0	84		1	1	1	1	43	1	8	9.54333	0	84		1	1	109	1	28	9.54333	0	84		1	1	9	1
9.54417	63	1	1	1	1	292	1	1	1	1	94	39.4		1	1	192	1	1	1	144	48.7143	9.54417	0	63		646	1167	435	1	38	16	383.833	9.54417	344.433	63		77	71	128	1	69.25	9.54417	0	63		798	1	1	1
9.545	236	1	66	4	1	63	49	44	66	1	65	36		31	70	72	1	1	62	52	41.2857	9.545	0	236		1	52	1	1	24	1	13.3333	9.545	0	236		49	18	1	1	17.25	9.545	0	236		1	23	34	138
9.54583	355	1	1	1	1	1	1	1	1	1	1	1		1	1	1	1	1	1	1	1	9.54583	#DIV/0!	355		1	33	1	1	1	1	6.33333	9.54583	0	355		1	1	1	1	1	9.54583	#DIV/0!	355		1	1	1	1
9.54667	65	1	1	91	1	1	1	1	1	1	1	10		1	1	119	1	1	1	1	17.8571	9.54667	0	65		1	234	1	1	1	1	39.8333	9.54667	0	65		1	1	169	1	43	9.54667	0	65		1	1	1	1
9.54833	546	1	1	1	1	1	1	1	1	1	1	1		1	1	1	1	1	1	1	1	9.54833	#DIV/0!	546		1	1	1	1	1	1	1	9.54833	#DIV/0!	546		1	1	1	1	1	9.54833	#DIV/0!	546		1	1	21	1
9.54917	60	1	1	43	1	1	1	791	191	1	1	103.2		17	1	1	1	1	1	1	3.28571	9.54917	0	60		1	1	1	1	1	1	1	9.54917	0	60		1	1	1	129	33	9.54917	0	60		1	1	1	1
9.55	78	1	1	1	1	1	1	1	1	1	1	1		133	1	1	1	1	1	1	19.8571	9.55	0	78		1	1	1	1	1	1	1	9.55	#DIV/0!	78		1	1	1	1	1	9.55	#DIV/0!	78		1	1	1	1
9.55083	74	1	1	1	1	1	1	1	1	1	1	1		1	1	1	1	1	1	1	1	9.55083	#DIV/0!	74		1	4694	1	1	1	1	783.167	9.55083	0	74		1	1	1	1	1	9.55083	#DIV/0!	74		1	1	1	1
9.55167	73	1	1	1	1	1	1	1	1	1	1	1		1	1	1	1	1	1	1	1	9.55167	#DIV/0!	73		1	1	1	1	1	1	1	9.55167	#DIV/0!	73		1	1	1	1	1	9.55167	#DIV/0!	73		1	1	1	1
9.5525	61	1	1	1	1	1	434	2609	1024	1	1	407.4		1	1	714	1	1	1	1	102.857	9.5525	0	61		1	1	1	250	1	1	42.5	9.5525	0	61		1	422	1	1	106.25	9.5525	0	61		1	1	1	1
9.55333	91	125	1	127	1	152	1	1	1	1	81	49.1		96	22	1	1	1	1	141	37.5714	9.55333	0	91		1	1	1	1	12	85	16.8333	9.55333	0	91		1	1	1	1	1	9.55333	0	91		1	1	1	1
9.55417	105	581	1	376	399	19	1	388	395	408	1	256.9		102	520	559	1	1	640	1	260.571	9.55417	0	105		1	1	366	1	1	1	61.8333	9.55417	0	105		1	1	847	355	301	9.55417	0	105		592	40	1	1
9.555	76	96	1	1	1	225	1	1	1	98	1	42.6		1	66	1	203	1	1	1	39.1429	9.555	0	76		40	1	1	46	1	1	15	9.555	0	76		1	1	1	1	1	9.555	0	76		1	1	1	1
9.55583	143	121	10	55	1	1	1	1	111	1	1	30.3		1	1	355	1	1	74	1	62	9.55583	0	143		1	1	1	13	1	1	3	9.55583	0	143		1	1	71	1	18.5	9.55583	0	143		1	1	1	1
9.55667	115	1	1	1	1	1	1	1	1	1	1	1		1	161	1	1	1	1	1	23.8571	9.55667	0	115		1	1	1	267	1	1	45.3333	9.55667	0	115		1	1	1	1	1	9.55667	#DIV/0!	115		1	1	1	1
9.5575	101	661	1	734	1	82	1	802	1	368	1	265.2		245	460	226	1	1	1	1	133.571	9.5575	0	101		1	1	1	1	92	1	16.1667	9.5575	0	101		1	93	752	1	211.75	9.5575	0	101		1	1	10	1
9.55833	77	4235	2772	2712	1	1	1133	5497	3903	410	1	2066.5		550	1	999	1	1	7151	912	1373.57	9.55833	0	77		1	1	1	1	1	625	105	9.55833	-1961.5	77		1560	1	4718	1	1570	9.55833	0	77		1	1	367	1
9.55917	97	400	752	320	1	1	94	218	382	200	47	241.5		115	175	1	1	1	112	180	83.5714	9.55917	0	97		1	1	1	1	36	107	24.5	9.55917	-217	97		10	1	356	124	122.75	9.55917	0	97		1	407	41	1
9.56	125	183	950	545	1	1	562	463	542	353	224	382.4		231	413	1	1	1	699	1	192.429	9.56	0	125		1	644	1	1	161	1	134.833	9.56	0	125		69	1	406	1	119.25	9.56	0	125		1	510	123	708
9.56083	88	1	1	1	1	17	1	150	1	1	1	17.5		1	260	70	1	1	1	1	47.8571	9.56083	0	88		95	1	16	116	1	1	38.3333	9.56083	0	88		1	1	326	13	85.25	9.56083	0	88		1	1	1	250
9.56167	148	1	3188	1	1	1	1	1	1	3508	5872	1257.5		1	2604	1	1337	1	1	1	563.714	9.56167	0	148		8225	1	1	1	1	1	1371.67	9.56167	0	148		1	1	1	1	1	9.56167	0	148		1	1	1	802
9.5625	83	1560	2536	1403	302	297	1604	1353	1671	1028	1	1175.5		706	1170	167	1	1	2274	117	633.714	9.5625	0	83		237	1	358	1	319	655	261.833	9.5625	-913.667	83		364	1	1110	1	369	9.5625	0	83		16	1488	354	1
9.56333	189	1	236	1	1	1	1	1	1	1	1	24.5		1	1	506	630	1	1	435	225	9.56333	200.5	189		359	1	1	1	1	1	60.6667	9.56333	0	189		1	1	1	1	1	9.56333	0	189		1	1	1	1148
9.56417	142	1	1	35	93	1	1	29	70	1	1	23.3		1	1	1	1	1	26	1	4.57143	9.56417	0	142		1	1	63	1	1	1	11.3333	9.56417	0	142		1	1	1	49	13	9.56417	0	142		1	1	1	1
9.565	87	1	1	1	251	228	1	1	677	1	1	116.3		282	1	1	1	1	1	1	41.1429	9.565	0	87		1	1	1	1	1	1	1	9.565	0	87		1	1	1	154	39.25	9.565	0	87		1	1	1	258
9.56583	149	1	1321	1	1	1	1	1	1	1	187	151.6		1	2155	1	1	3788	1	52	857	9.56583	0	149		1	1	1	1	1	246	41.8333	9.56583	0	149		1	1	1	761	191	9.56583	0	149		1	75	1	698
9.56667	80	2982	1	1787	2925	2429	1	1832	1	1	138	1209.7		1177	1	1	3475	1085	2820	1	1222.86	9.56667	0	80		1796	13	2163	3315	1	1556	1474	9.56667	0	80		114	984	2217	1519	1208.5	9.56667	0	80		2895	1	1	594
9.56833	112	1	110	47	1	23	54	7	83	38	32	39.6		41	9	68	261	66	82	11	76.8571	9.56833	0	112		1	1	1	111	1	37	25.3333	9.56833	0	112		1	4	99	64	42	9.56833	0	112		74	47	1	449
9.56917	130	1	1	1	1	1	1	1	1	1	1	1		1	65	1	1	66	1	55	27.1429	9.56917	26.1429	130		1	57	1	1	1	10	11.8333	9.56917	0	130		1	1	1	1	1	9.56917	#DIV/0!	130		1	1	1	1
9.57	173	1	1	1	1	1	1	1	1	1	1	1		1	1	1	1	1	125	1	18.7143	9.57	0	173		76	1	1	1	1	1	13.5	9.57	0	173		1	1	1	1	1	9.57	#DIV/0!	173		1	1	1	46
9.57083	81	1	146	33	213	79	225	174	354	140	1	136.6		71	1	24	1	110	1	1	29.8571	9.57083	-106.743	81		38	1	1	1	1	1	7.16667	9.57083	-129.433	81		1	7	385	139	133	9.57083	0	81		1	1	56	1
9.57167	117	1128	1	1	1086	1	1	1	1	1	1	222.2		1	1	807	493	1	939	1	320.429	9.57167	0	117		1	1	1	1	1	1	1	9.57167	0	117		1	1	1	1	1	9.57167	0	117		1	1	1	1
9.5725	71	1	1	1	35	1	1	767	1	1	1	81		1	1	206	1	1	242	1	64.7143	9.5725	0	71		1	1	1	1	1	1	1	9.5725	0	71		131	1	1	1	33.5	9.5725	0	71		1	1	1	1
9.57333	77	1	1	1	1152	1	1	1	1	1	1	116.1		1	3166	1252	2152	1	1	1	939.143	9.57333	0	77		439	1	1	903	1	1	224.333	9.57333	0	77		1	400	1	175	144.25	9.57333	0	77		1	1	1	1
9.57417	384	1	1	1	1	1	1	1	1	1	1	1		1	21	1	1	1	1	1	3.85714	9.57417	0	384		1	1	14	1	1	1	3.16667	9.57417	0	384		1	1	1	1	1	9.57417	#DIV/0!	384		1	1	14	1
9.575	221	1	1	1	1305	1	1	1	1	1	1	131.4		1	1	1	1657	708	1	1093	494.571	9.575	0	221		1215	1	1110	1635	1	1	660.5	9.575	0	221		1	1	1	1	1	9.575	0	221		1623	1	1	1
9.57583	69	1610	971	368	1	585	735	1	1891	785	404	735.1		239	1	290	1	678	1971	1	454.429	9.57583	0	69		1	2819	1	1	89	282	532.167	9.57583	0	69		365	513	1	1	220	9.57583	0	69		885	1	46	1
9.5775	159	1	9	76	1	1	1	105	188	1	115	49.8		1	1	880	1	1	160	910	279.143	9.5775	0	159		1	1	1	1	84	1	14.8333	9.5775	0	159		1	1	39	83	31	9.5775	0	159		171	94	139	1
9.57833	147	1	1	1	1	40814	1	41608	62480	1	46679	19158.7		13187	25871	39691	1	48901	91209	59502	39766	9.57833	0	147		58497	1	1	16133	1	31906	17756.5	9.57833	0	147		38760	9726	1	1	12122	9.57833	0	147		1	1	1	1
9.57917	103	1	1	1	1	1109	1	1	1	1	1	111.8		1	1678	1	1	898	1	1	368.714	9.57917	0	103		1	1	1	1	1	1	1	9.57917	0	103		1	1	1	1	1	9.57917	0	103		1	1	1	1
9.58	90	80	1	1	1	1	73	9	167	106	1	44		1	71	1	156	1	79	1	44.2857	9.58	0	90		22	1	44	58	58	1	30.6667	9.58	0	90		76	1	126	1	51	9.58	0	90		1	61	1	1158
9.58083	211	1	10	44	15	1	29	47	47	8	36	23.8		38	39	73	117	51	53	62	61.8571	9.58083	38.0571	211		59	6	82	90	37	1	45.8333	9.58083	0	211		46	32	1	1	20	9.58083	0	211		105	40	41	291
9.58167	84	151	119	123	92	76	138	439	315	275	410	213.8		89	190	47	89	49	916	69	207	9.58167	0	84		73	1	54	49	303	199	113.167	9.58167	0	84		379	76	213	119	196.75	9.58167	0	84		155	169	209	3374
9.5825	187	1	1	1	1	1	1	8	1	1	1	1.7		1	1	244	1	1	8	1	36.7143	9.5825	0	187		1	1	1	1	4	1	1.5	9.5825	0	187		1	1	55	1	14.5	9.5825	0	187		1	1	1	1
9.58333	92	1	87	1	155	1	1	1	1	1	1	25		1	1	1	161	1	17	85	38.1429	9.58333	0	92		160	51	1	252	1	1	77.6667	9.58333	0	92		1	1	1	16	4.75	9.58333	0	92		148	2	1	602
9.58417	297	1	1	1	1	1	1	1	1	1	1	1		1	1	1	1	1	1	1	1	9.58417	#DIV/0!	297		1	1	1	1	1	1	1	9.58417	#DIV/0!	297		1	1	1	1	1	9.58417	#DIV/0!	297		1	1	1	1
9.585	60	25	314	176	254	1	1	1	270	1	4544	558.7		1	257	167	152	1	1196	272	292.286	9.585	0	60		65	1	1	1	1	1	11.6667	9.585	0	60		3906	181	446	80	1153.25	9.585	0	60		1	1	884	6269
9.58583	154	1	1	141	1	185	83	240	243	199	1	109.5		1	157	136	105	1	1	1	57.4286	9.58583	0	154		335	1	1	324	153	1	135.833	9.58583	0	154		144	269	254	340	251.75	9.58583	142.25	154		1	41	200	88
9.58667	141	1	1	1	16	109	1	1	71	1	1	20.3		5	1	1	1	1	1	65	10.7143	9.58667	0	141		1	31	102	1	1	46	30.3333	9.58667	0	141		50	1	1	11	15.75	9.58667	0	141		1	1	1	1
9.5875	148	1	1	1	1839	1	1	2470	1	1	5859	1017.5		1031	1	2044	1	1	1	1	440	9.5875	0	148		1	11479	1309	1	1	1	2132	9.5875	0	148		1	1	1	1	1	9.5875	0	148		1	1	1	1
9.58833	66	1	1922	2991	1	2659	1	3491	3274	4192	1	1853.3		1	1	1	1	1	1	14544	2078.57	9.58833	0	66		1	12084	1406	1	1	1209	2450.33	9.58833	0	66		1	1453	1	1	364	9.58833	0	66		1	1	1	1
9.58917	253	1	57	78	1	108	61	115	133	123	224	90.1		66	88	1	82	92	232	98	94.1429	9.58917	0	253		137	113	76	137	132	125	120	9.58917	0	253		322	127	118	105	168	9.58917	0	253		123	105	134	211
9.59083	210	1	1	1	1	1	1	51	1	1	1	6		1	1	1	1	1	59	1	9.28571	9.59083	0	210		1	1	1	1	1	1	1	9.59083	0	210		1	1	1	1	1	9.59083	0	210		1	1	1	1
9.59167	69	1	1	1	1049	1	1	1	1	1	1	105.8		1	1	1	1	1	1	1	1	9.59167	0	69		427	1	661	784	1	1	312.5	9.59167	0	69		1	1	1	28	7.75	9.59167	0	69		531	1	1	1
9.5925	129	1	1	1	1	1	1	1	1	1	1	1		1	1	441	1	1	1	521	138.143	9.5925	0	129		1	1	1	1	1	1	1	9.5925	#DIV/0!	129		1	1	1	1	1	9.5925	#DIV/0!	129		1	1	1	1
9.59333	131	1	163	1743	1	1	1	1	884	1	1	279.7		1	1	2518	1	1	1	1545	581.143	9.59333	0	131		1	410	1707	1700	1	662	746.833	9.59333	0	131		785	1187	3415	993	1595	9.59333	1315.3	131		1	1	1	574
9.59417	100	1	1	1	8053	1	1	360	1	1	1	842.1		1	1	1021	1	6780	1	1	1115.14	9.59417	0	100		6340	1	4808	7065	10	1	3037.5	9.59417	0	100		1	70	6821	1	1723.25	9.59417	0	100		8542	1	1	1
9.595	149	1	1	802	1	1	1	1	1	1	1	81.1		1	1	1276	1	1	1	271	221.714	9.595	0	149		1	1	999	1	1	1	167.333	9.595	0	149		1	1	1	1	1	9.595	0	149		1	1	2325	1
9.59583	93	1	1	1	1	1	1	1	178	1	1	18.7		10	1	108	1	80	1	171	53.1429	9.59583	0	93		78	1	1	1	1	1	13.8333	9.59583	0	93		1	1	1	1	1	9.59583	0	93		1	1	1	1
9.59667	157	1	1	1	1	1	1	1	1	394	1	40.3		1	1	672	1	1	1	937	230.571	9.59667	0	157		1	183	1	1	1	1	31.3333	9.59667	0	157		97	239	1	1	84.5	9.59667	0	157		1	1	1	1
9.5975	133	418	1	222	1	1	1	1	1	291	1	93.8		1	1	1	1	268	1	1186	208.429	9.5975	0	133		1	1	12	1	1	1	2.83333	9.5975	0	133		1	1	497	1	125	9.5975	0	133		1	1	212	1
9.59833	281	1	13	1	1	1	1	1	1	1	1	2.2		17	1	1	1	1	1	1	3.28571	9.59833	0	281		1	1	1	1	1	1	1	9.59833	0	281		1	1	1	1	1	9.59833	0	281		1	1	1	40
9.59917	150	1	1	9	1	1	1	1	158	1	44	21.8		8	135	60	1	114	1	14	47.5714	9.59917	0	150		9	1	16	1	1	1	4.83333	9.59917	0	150		1	1	1	46	12.25	9.59917	0	150		28	1	1	1
9.6	79	81151	1	1	19039	1	1	1	10989	20164	1	13134.9		1	1	1	1	11386	55035	1	9489.43	9.6	0	79		1	6777	35062	1	1	14955	9466.17	9.6	0	79		1	552	1	1	138.75	9.6	0	79		1	1	1	1
9.60083	290	1	29	1	1	1	29	32	29	25	1	14.9		1	36	1	30	1	1	40	15.7143	9.60083	0	290		1	20	13	1	2	1	6.33333	9.60083	0	290		1	1	1	1	1	9.60083	0	290		1	22	1	80
9.60167	119	373	1461	1464	1	1	1622	1125	1013	1527	1152	973.9		778	1968	2353	1	1	1781	1472	1193.43	9.60167	0	119		105	2131	282	1	820	613	658.667	9.60167	0	119		600	582	1	1	296	9.60167	0	119		477	1010	740	6309
9.6025	235	1	1	1	1	28	1	25	30	1	26	11.5		36	41	1	1	1	1	29	15.7143	9.6025	0	235		1	1	28	1	24	1	9.33333	9.6025	0	235		51	31	1	44	31.75	9.6025	0	235		1	18	1	46
9.60333	101	320	716	446	229	1	1	1	414	1	4957	708.6		118	1	1	182	84	791	896	296.143	9.60333	0	101		1	1608	127	1	1	1	289.833	9.60333	0	101		4611	1	443	121	1294	9.60333	0	101		1	367	1	6369
9.60417	91	52	1	1	1	1	46	1	1	929	1013	204.6		1	57	1	1	1	41	1	14.7143	9.60417	0	91		1	1	1	1	1	1	1	9.60417	0	91		1	1	1	1	1	9.60417	0	91		1	27	1	1724
9.605	500	1	1	1	1	1	1	1	1	1	1	1		1	1	1	1	1	1	1	1	9.605	#DIV/0!	500		1	1	1	1	1	1	1	9.605	#DIV/0!	500		1	1	1	16	4.75	9.605	0	500		1	1	1	1
9.60583	106	1	1	11	1	1	1	1	1	1	198	21.7		1	1	1	1	1	155	1	23	9.60583	0	106		1	1	1	1	1	1	1	9.60583	0	106		1	1	1	1	1	9.60583	0	106		1	1	1	860
9.60667	134	42	1	11	1	89	1	1	1	1	1	14.9		1	1	1	1	16	13	14	6.71429	9.60667	0	134		231	1	1	1	105	13	58.6667	9.60667	0	134		1	56	1	20	19.5	9.60667	0	134		1	13	1	417
9.6075	161	1	62	1	22	1	75	1	80	1	1	24.5		1	110	1	1	1	85	1	28.5714	9.6075	0	161		1	1	1	1	1	1	1	9.6075	0	161		1	1	86	10	24.5	9.6075	0	161		1	50	1	147
9.60833	159	527	959	902	1272	360	655	583	808	536	482	708.4		385	818	1	1126	642	736	1	529.857	9.60833	0	159		655	1	801	961	409	421	541.333	9.60833	0	159		126	305	943	510	471	9.60833	0	159		1340	494	503	1292
9.60917	304	1	1	1	1	1	1	1	1	1	1	1		1	1	1	1	1	1	1	1	9.60917	#DIV/0!	304		1	1	25	1	1	1	5	9.60917	0	304		1	1	22	1	6.25	9.60917	0	304		1	1	1	15
9.61	118	1	330	344	735	1	1	366	287	1	1	206.7		70	137	1	576	624	1	1	201.429	9.61	0	118		793	314	614	896	1	180	466.333	9.61	0	118		480	1	347	1	207.25	9.61	0	118		756	274	1	547
9.61083	330	1	1	4	1	1	20	1	1	1	14	4.5		21	1	1	1	1	1	1	3.85714	9.61083	0	330		1	1	1	1	4	1	1.5	9.61083	0	330		12	1	25	1	9.75	9.61083	0	330		1	1	1	1
9.61167	154	1	1	94	1	1	1	1	145	1	154	40		84	71	1	1	219	152	1	75.5714	9.61167	0	154		1	56	1	185	1	1	40.8333	9.61167	0	154		1	182	1	201	96.25	9.61167	0	154		1	1	1	86
9.6125	95	1	145	305	395	1	1	1	336	1	50	123.6		6	121	223	1	113	195	151	115.714	9.6125	0	95		96	1248	182	226	1	56	301.5	9.6125	0	95		135	36	161	1	83.25	9.6125	0	95		1	160	24	215
9.61333	69	1209	898	1	1143	110	1106	1	1324	1	1	579.4		209	1	1194	1374	1	1	1011	541.571	9.61333	0	69		1	1	338	1	320	1	110.333	9.61333	0	69		107	1121	1	858	521.75	9.61333	0	69		3674	573	329	11530
9.61417	62	71	74	30	64	1	157	1	82	1	713	119.4		1	105	1	29	1	187	1	46.4286	9.61417	0	62		21	36	1	1	1	11	11.8333	9.61417	0	62		382	1	88	1	118	9.61417	0	62		1	1	46	1709
9.615	145	1204	1502	1334	2007	563	1041	1055	1211	848	772	1153.7		512	1266	1	1822	928	1020	1302	978.714	9.615	0	145		993	1	1143	1414	612	580	790.5	9.615	0	145		265	396	1682	796	784.75	9.615	0	145		1895	745	706	2244
9.61583	144	160	239	301	278	98	392	326	322	226	198	254		119	398	143	284	64	284	132	203.429	9.61583	0	144		60	86	78	130	112	100	94.3333	9.61583	-159.667	144		109	37	271	160	144.25	9.61583	0	144		132	231	247	1703
9.61667	131	2803	1867	2138	2126	1	919	4151	1	844	256	1510.6		1	1	1	1423	1	3060	1	641.143	9.61667	0	131		1	512	1	1	140	1	109.333	9.61667	-1401.27	131		1386	1067	3816	1212	1870.25	9.61667	0	131		1	1	1	4427
9.6175	67	1	855	1	1	1	462	1608	773	533	1	423.6		316	1	1	565	1	1	511	199.429	9.6175	0	67		612	1	156	34	1	1	134.167	9.6175	0	67		140	1	1	1	35.75	9.6175	0	67		1	1	1	990
9.61833	238	1	1	1	1	1	1	1	1	1	1	1		1	1	1	1	1	1	31	5.28571	9.61833	0	238		1	1	1	1	1	1	1	9.61833	#DIV/0!	238		1	1	1	1	1	9.61833	#DIV/0!	238		1	1	1	213
9.61917	143	340	322	274	387	53	285	137	286	143	207	243.4		1	307	1	255	140	311	309	189.143	9.61917	0	143		257	120	224	314	114	49	179.667	9.61917	0	143		1	103	407	125	159	9.61917	0	143		465	146	108	1972
9.62	75	1	1	8965	10483	1	1	1	1	1	72368	9182.3		1	11884	8919	7556	6568	16147	1	7296.57	9.62	0	75		5563	25729	3953	1	1	3054	6383.5	9.62	0	75		66529	4902	14437	4582	22612.5	9.62	0	75		10223	1	9518	90600
9.62083	72	1	1374	972	1	1	1	1	684	1	2246	528.2		1	1280	1	514	814	1	1	373.143	9.62083	0	72		842	1	272	474	1	267	309.5	9.62083	0	72		1	1	784	1	196.75	9.62083	0	72		1	1	1	15816
9.62167	77	1	1	1	1	1	1	1	1	1	9414	942.3		2556	1	1	1	1	1	1	366	9.62167	0	77		1	1	1438	1	1	1	240.5	9.62167	0	77		7538	2471	1	1	2502.75	9.62167	0	77		1	1	1621	62949
9.6225	61	1	1562	1	1	170	1	1	1	1	7763	950.2		1	1318	561	2043	267	2789	1	997.143	9.6225	0	61		1	3060	594	693	1	190	756.5	9.6225	0	61		7271	838	1243	177	2382.25	9.6225	0	61		1	1	1	10640
9.62333	135	67	3	80	6	1	41	1	1	1	1	20.2		1	1	38	63	1	16	152	38.8571	9.62333	0	135		1	51	30	1	1	1	14.1667	9.62333	0	135		136	1	1	49	46.75	9.62333	0	135		1	1	1	689
9.62417	148	3537	3350	1	1912	1	2657	3390	1	1	7318	2216.8		937	2759	1160	3289	1	1	1	1164	9.62417	0	148		1	11794	1	1	1	1	1966.5	9.62417	0	148		1	1	1012	1	253.75	9.62417	0	148		1	1	4947	5667
9.625	86	1	1813	1294	1	1	1	1	2232	2036	1793	917.3		1729	696	379	1	1	1	2599	772.286	9.625	0	86		1	1	1	1	151	1477	272	9.625	0	86		1	383	1	1	96.5	9.625	0	86		35	1	1	4319
9.62583	147	1	2915	1	15798	35685	1	47472	57829	7183	54166	22105.1		12569	9742	33872	1	54544	1	1	15818.6	9.62583	0	147		1	1370	1	14772	1	1	2691	9.62583	0	147		40550	1	17906	1	14614.5	9.62583	0	147		1	1	1	22843
9.62667	141	1	1	1	1	1	1	1	83	1	123	21.4		32	1	1	1	1	1	1	5.42857	9.62667	0	141		1	5	83	1	1	1	15.3333	9.62667	0	141		110	1	54	1	41.5	9.62667	0	141		1	1	1	122
9.6275	312	1	1	1	1	1	1	1	1	1	1	1		1	18	1	1	13	1	1	5.14286	9.6275	0	312		1	1	1	1	1	1	1	9.6275	#DIV/0!	312		1	1	1	1	1	9.6275	#DIV/0!	312		1	1	1	1
9.62833	133	1	1	1	487	1	1	1	1	1	1	49.6		20	1	1	391	1	1	1	59.4286	9.62833	0	133		1	1	1	1	1	1	1	9.62833	0	133		1	1	1	1	1	9.62833	0	133		1	1	1	1
9.62917	149	1	1384	922	1	1	738	3015	1	1418	747	822.8		830	2158	1	1	1	6329	1	1331.57	9.62917	0	149		418	1	1	255	1	1	112.833	9.62917	0	149		1	1	1	1	1	9.62917	0	149		1	419	1	3184
9.63	264	1	7	8	1	1	1	1	1	1	1	2.3		1	1	1	1	1	1	30	5.14286	9.63	0	264		1	1	1	1	1	1	1	9.63	0	264		11	1	1	1	3.5	9.63	0	264		1	1	1	1
9.63083	319	1	26	1	1	1	1	1	1	63	1	9.7		27	61	44	51	1	43	1	32.5714	9.63083	0	319		1	1	38	1	4	1	7.66667	9.63083	0	319		22	18	1	34	18.75	9.63083	0	319		143	1	49	1
9.63167	189	1	1	1	1	1	1	1	1	1	1	1		1	159	1	1	1	1	97	37.2857	9.63167	0	189		1	1	1	1	42	1	7.83333	9.63167	0	189		1	1	1	1	1	9.63167	#DIV/0!	189		111	1	1	1
9.6325	117	2129	61	1184	1881	1	1	1	1481	1	1240	798		116	1	489	1627	1	1	1	319.429	9.6325	0	117		1199	1	1	1	1	1	200.667	9.6325	0	117		1	1	1900	1	475.75	9.6325	0	117		432	933	1650	3419
9.63333	65	1	97	1	232	1	49	106	1	1	1182	167.1		1	128	1	28	1	28	103	41.4286	9.63333	0	65		127	47	169	32	1	92	78	9.63333	0	65		1	1	23	1	6.5	9.63333	0	65		1	1	1	1175
9.63417	150	1	9	1	1	1	9	51	1	1	136	21.1		48	211	1	1	163	1	1	60.8571	9.63417	0	150		1	9	1	1	67	1	13.3333	9.63417	0	150		47	1	84	27	39.75	9.63417	0	150		28	57	1	502
9.635	239	1	25	1	1	1	1	1	1	1	1	3.4		1	1	1	1	1	1	1	1	9.635	0	239		1	1	1	1	1	1	1	9.635	0	239		1	22	1	1	6.25	9.635	0	239		1	1	1	110
9.63583	222	1	31	11	29	1	68	1	68	67	1	27.8		1	92	158	134	1	72	1	65.5714	9.63583	0	222		1	1	1	1	1	13	3	9.63583	0	222		82	1	25	96	51	9.63583	0	222		1	1	56	150
9.63667	221	1	1	1	831	125	238	1	1	340	1	154		1	432	569	1	1	1	301	186.571	9.63667	0	221		1	137	1	1	216	176	88.6667	9.63667	0	221		254	173	1	1	107.25	9.63667	0	221		1068	130	217	1
9.6375	251	1	1	1	1	1	1	1	1	1	1	1		1	1	1	1	1	1	1	1	9.6375	#DIV/0!	251		1	1	1	1	1	1	1	9.6375	#DIV/0!	251		1	1	1	1	1	9.6375	#DIV/0!	251		1	1	1	1
9.64	103	4984	3116	2336	4792	1954	4281	5322	4472	3683	5144	4008.4		554	3741	3917	1	1	5109	3951	2467.71	9.64	0	103		3123	4749	3413	5786	2048	1907	3504.33	9.64	0	103		1494	916	5567	1	1994.5	9.64	0	103		1	2342	364	42895
9.64083	151	1	235	1	1	1	1	1	1	1	1	24.4		1	1	1	1	1	1	16	3.14286	9.64083	0	151		13	1	1	1	44	59	19.8333	9.64083	0	151		1	72	1	69	35.75	9.64083	0	151		1	112	1	1951
9.64167	105	1	1	1	1	1	1	1	1	1	1	1		171	1	1	1	1	1	378	79.1429	9.64167	0	105		377	1	1	1	217	115	118.667	9.64167	117.667	105		268	1	1	1	67.75	9.64167	0	105		1	1	1	4885
9.6425	66	1	1	1914	1	1200	1	1	1524	3695	1	833.9		1	1	1	1	1	1	1	1	9.6425	0	66		15702	1	1	1	1	1	2617.83	9.6425	0	66		1	1	1	1	1	9.6425	0	66		1	1	1	1213
9.64417	154	1	1	1	1	27	1	1	1	1	1	3.6		1	1	1	1	1	88	1	13.4286	9.64417	0	154		70	1	171	1	1	1	40.8333	9.64417	0	154		1	1	1	1	1	9.64417	0	154		1	1	1	1
9.645	119	2071	1	1	1171	904	1	1	1	1	1	415.3		1	1	1	3134	1170	1	1	615.571	9.645	0	119		1787	1	1717	2301	1	1	968	9.645	0	119		1	1	2205	1018	806.25	9.645	0	119		2614	1	1	1
9.64583	118	336	1	1	178	1	1	1	1	1	1	52.2		1	1	1	1	434	516	308	180.286	9.64583	0	118		296	1	1	146	1	1	74.3333	9.64583	0	118		1	1	1	292	73.75	9.64583	0	118		287	422	165	1
9.64667	73	1	11637	19669	4521	2850	1	1	22415	1	1	6109.7		2541	1	9332	2062	28037	36604	22401	14425.4	9.64667	0	73		1	25747	1	13544	1	1441	6789.17	9.64667	0	73		1	17831	31913	5673	13854.5	9.64667	0	73		13224	22447	1	224733
9.6475	454	1	1	1	1	1	1	1	1	1	1	1		1	1	1	1	1	1	1	1	9.6475	#DIV/0!	454		1	1	1	1	1	1	1	9.6475	#DIV/0!	454		1	6	1	1	2.25	9.6475	0	454		1	1	1	1
9.64833	175	42	316	239	358	134	250	197	266	290	181	227.3		110	315	318	489	120	274	211	262.429	9.64833	0	175		173	420	261	387	152	170	260.5	9.64833	0	175		127	74	337	186	181	9.64833	0	175		343	181	124	955
9.64917	127	1	1	1	1	85	175	1	1	50	1	31.7		55	159	13	21	112	167	200	103.857	9.64917	72.1571	127		15	72	7	1	1	143	39.8333	9.64917	0	127		1	32	503	120	164	9.64917	0	127		1	1	1	16
9.65	170	145	1	74	168	1	1	345	1	205	517	145.8		1	1	1	99	196	1	1	42.8571	9.65	0	170		178	103	1	1	59	1	57.1667	9.65	0	170		309	67	1	1	94.5	9.65	0	170		251	146	1	1
9.65083	80	1	1	1	1	1	1	398	1	1	1	40.7		1	255	153	1	144	1	1	79.4286	9.65083	0	80		1	1	290	1	1	1	49.1667	9.65083	0	80		1	76	184	311	143	9.65083	0	80		1	1	1	1
9.65167	88	744	363	330	387	1	322	1	1	204	1	235.4		1	551	250	30	1	1	1	119.286	9.65167	0	88		1	773	1	120	1	1	149.5	9.65167	0	88		237	1	1	205	111	9.65167	0	88		276	78	237	2125
9.6525	116	5706	1	1591	1199	1832	1	1	1	924	1	1125.7		132	3494	2243	1518	3356	5739	2316	2685.43	9.6525	0	116		1874	1	1	2545	1	1985	1067.83	9.6525	0	116		1	1	1	1	1	9.6525	0	116		4403	1	1	1521
9.65333	71	597	236	231	271	1	242	1725	603	904	1034	584.4		233	1	1	465	267	644	119	247.143	9.65333	0	71		1	185	195	194	1	1	96.1667	9.65333	-488.233	71		920	18	314	110	340.5	9.65333	0	71		1	127	42	2834
9.65417	70	1207	406	1	1	189	1	2480	1	1	832	511.9		316	230	20	458	1	1255	117	342.429	9.65417	0	70		1	195	1	1	261	1	76.6667	9.65417	0	70		606	518	633	1	439.5	9.65417	0	70		1	322	105	5986
9.655	95	650	334	1	1	1	308	399	1	263	253	221.1		1	442	1	285	1	426	1	165.286	9.655	0	95		1	1	1	1	132	1	22.8333	9.655	-198.267	95		1	1	680	180	215.5	9.655	0	95		490	1	1	962
9.65583	104	621	211	438	1	134	463	659	575	573	592	426.7		154	576	1	1	579	537	121	281.286	9.65583	0	104		1	279	397	961	161	77	312.667	9.65583	0	104		314	238	858	307	429.25	9.65583	0	104		1185	282	86	6424
9.65667	79	84158	1	1	24982	1	3071	1	10975	25067	11145	15940.2		1	83627	45643	1	1	1	1	18467.9	9.65667	0	79		1	6397	35143	11733	1	14929	11367.3	9.65667	0	79		1	1	1	1	1	9.65667	0	79		1	1	1	1
9.6575	207	2369	1874	1462	3593	1585	1076	1374	2472	1840	1858	1950.3		971	1584	1	4871	2100	1907	1	1633.57	9.6575	0	207		2800	522	2745	4995	811	1152	2170.83	9.6575	0	207		769	563	2451	1034	1204.25	9.6575	0	207		4785	764	775	5119
9.65833	121	321	118	147	354	1	353	1	361	1	1	165.8		1	210	1	1	1	1	1	30.8571	9.65833	0	121		82	1	15	133	55	1	47.8333	9.65833	0	121		1	1	1	1	1	9.65833	0	121		322	1	1	1323
9.65917	96	415	252	1	584	136	1	1	402	407	317	251.6		1	1	464	106	415	1	203	170.143	9.65917	0	96		236	123	433	783	106	79	293.333	9.65917	0	96		175	31	1	197	101	9.65917	0	96		967	104	81	893
9.66	75	60246	1	1	1	1	1	71658	52967	76006	1	26088.3		1	1	1	1	1	1	1	1	9.66	0	75		1	1	1	7641	1	1	1274.33	9.66	0	75		1	1	1	1	1	9.66	0	75		10864	1	1	1
9.66083	401	1	1	1	1	13	1	1	1	1	1	2.2		1	1	1	1	1	1	1	1	9.66083	0	401		1	1	1	1	1	1	1	9.66083	0	401		1	7	1	1	2.5	9.66083	0	401		1	1	1	1
9.66167	61	7238	1	1	1089	1	1	10225	5969	8191	1	3271.7		1	1	1	1	1	1	1	1	9.66167	0	61		124	1	394	1218	1	1	289.833	9.66167	0	61		1	1	1	1	1	9.66167	0	61		1	1	1	1
9.6625	267	1	34	27	93	13	15	1	57	39	50	33		1	34	112	27	1	38	57	38.5714	9.6625	0	267		1	13	78	113	4	43	42	9.6625	0	267		1	1	1	1	1	9.6625	-32	267		1	1	19	109
9.66333	148	3892	1	1	2834	1	1	1	1	2887	1	962		1	1	1	1	1	1	1	1	9.66333	0	148		9327	1	1	1083	1	1	1735.67	9.66333	0	148		1	355	784	1	285.25	9.66333	0	148		1	1	1	1
9.66417	145	1	1	1	1	1	1	1	1	1	1	1		1	1	19	1	1	1	1	3.57143	9.66417	0	145		1	475	76	110	1	1	110.667	9.66417	0	145		1	1	1	1	1	9.66417	#DIV/0!	145		1	1	1	1
9.665	208	1	1	1	729	296	1	1	1	392	1	142.4		132	1	1	1	392	333	1	123	9.665	0	208		575	95	571	909	1	1	358.667	9.665	0	208		1	1	465	210	169.25	9.665	0	208		892	1	1	1
9.66583	165	36582	1	1	1	1	1	42222	34071	48119	44499	20549.8		34078	1	1	1	1	1	1	4869.14	9.66583	0	165		1	1	1	132	24205	1	4056.83	9.66583	0	165		43872	1	1	1	10968.8	9.66583	0	165		252	1	3	32987
9.66667	167	2475	1	1	1	1	1	3686	2918	4175	3997	1725.6		2905	1	1	1	1	1	1	415.857	9.66667	0	167		1	1	1	1	2120	1	354.167	9.66667	0	167		3987	1	1	1	997.5	9.66667	0	167		1	1	1	2822
9.6675	161	1	92	9	22	12	1	90	1	73	87	38.8		1	1	19	96	100	1	1	31.2857	9.6675	0	161		13	83	19	143	87	1	57.6667	9.6675	0	161		42	53	184	1	70	9.6675	0	161		149	58	47	1
9.66833	166	3087	1804	999	1	3544	1345	4491	3537	4994	4757	2855.9		3549	709	3227	1	1	1014	3766	1752.43	9.66833	0	166		1746	67	2112	1	2533	1819	1379.67	9.66833	0	166		4569	1845	696	1268	2094.5	9.66833	0	166		1	1241	1549	3591
9.66917	149	2229	1	1	364	1	1	1	1	1	1	260.1		426	1	1	907	4352	1	1	812.714	9.66917	0	149		1	5235	1	617	1	56	985.167	9.66917	0	149		1	1	1	1	1	9.66917	0	149		1808	1	1	1
9.67	85	7392	1	47	1	1	1	8281	5105	9697	1	3052.7		6707	1	1	1	1	1	1	959	9.67	0	85		1	1	21	1	4922	1	824.5	9.67	0	85		1	1	1	106	27.25	9.67	0	85		1	1	1	1
9.67083	240	1	1	1	1	1	1	13	1	1	1	2.2		1	1	1	1	21	17	49	13	9.67083	0	240		1	1	1	1	1	1	1	9.67083	0	240		1	1	1	1	1	9.67083	0	240		1	1	1	1
9.67167	209	1	376	1	830	213	1	1	540	1	373	233.7		86	1	683	1	1	1	321	156.286	9.67167	0	209		426	1	530	1	148	173	213.167	9.67167	0	209		155	77	1	234	116.75	9.67167	0	209		1001	120	144	1
9.6725	222	1	80	1	1	1	1	1	1	1	1	8.9		1	1	1	1	1	1	1	1	9.6725	0	222		1	1	1	1	1	1	1	9.6725	0	222		1	1	1	1	1	9.6725	0	222		247	1	1	1
9.67333	176	1	82	77	136	44	1	66	96	95	1	59.9		1	1	137	1	78	1	74	41.8571	9.67333	0	176		115	1	99	185	1	37	73	9.67333	0	176		1	1	1	36	9.75	9.67333	0	176		179	1	1	1
9.67417	106	1	1	1	1	59	148	1	195	1	1	40.9		1	165	1	1	11	1	1	25.8571	9.67417	0	106		16	1	173	1	69	1	43.5	9.67417	0	106		98	1	1	1	25.25	9.67417	0	106		1	68	7	1072
9.675	150	1	1	1	103	1	1	144	1	88	1	34.2		1	1	1	115	1	91	1	30.1429	9.675	0	150		91	1	1	97	1	1	32	9.675	0	150		1	1	1	1	1	9.675	0	150		200	1	1	1
9.67583	210	1	8	98	192	1	56	1	49	91	60	55.7		1	1	124	1	1	1	8	19.5714	9.67583	0	210		14	1	86	1	1	1	17.3333	9.67583	0	210		27	1	123	69	55	9.67583	0	210		282	1	38	1
9.67667	98	1	1	1	205	1	150	1	214	1	1	57.6		103	1	1	1	1	1	1	15.5714	9.67667	0	98		1	66	1	1	7	81	26.1667	9.67667	0	98		242	1	1	188	108	9.67667	0	98		383	1	1	1
9.6775	131	1	1	1	1822	1	1	1	1	1	1	183.1		1	1	1	1	1	1	1	1	9.6775	0	131		1	1	153	894	1	1	175.167	9.6775	0	131		1	1	1	1	1	9.6775	0	131		1	1	1	1
9.67917	127	1	1	9	1	1	35	42	1	1	1	9.3		1	1	104	123	1	179	1	58.5714	9.67917	0	127		1	1	1	1	1	1	1	9.67917	0	127		1	4	168	1	43.5	9.67917	0	127		1	1	1	85
9.68	171	1	1	1	1	1	1	49	1	1	57	11.4		1	1	1	1	1	44	79	18.2857	9.68	0	171		16	1	1	1	1	1	3.5	9.68	0	171		30	29	1	1	15.25	9.68	0	171		92	4	1	533
9.68083	71	1	1	1	235	515	465	1	1	1	1	122.2		1	271	1	1	1	1	1	39.5714	9.68083	0	71		1	1	1	1	1	1	1	9.68083	0	71		1	1	1	1	1	9.68083	0	71		805	1	1	1
9.68167	272	1	1	53	1	3	7	1	1	130	1	19.9		1	1	1	1	93	1	1	14.1429	9.68167	0	272		47	1	83	156	1	34	53.6667	9.68167	0	272		1	1	1	118	30.25	9.68167	0	272		156	127	1	1
9.6825	168	1	157	77	1	170	199	343	328	311	289	187.6		160	1	159	16	1	144	183	94.8571	9.6825	0	168		1	1	1	1	227	1	38.6667	9.6825	-148.933	168		222	7	1	1	57.75	9.6825	0	168		1	123	55	103
9.68333	229	1	6	1	1	1	1	1	1	33	4	5		1	1	1	1	1	1	1	1	9.68333	0	229		1	1	1	1	1	1	1	9.68333	0	229		2	1	1	36	10	9.68333	0	229		1	1	1	1
9.68417	321	1	5	47	1	1	23	1	1	1	3	8.4		1	10	41	10	44	8	1	16.4286	9.68417	0	321		1	1	1	1	1	1	1	9.68417	0	321		11	1	16	42	17.5	9.68417	0	321		1	1	1	1
9.685	241	1	37	43	61	19	46	43	43	57	31	38.1		1	39	45	1	1	42	1	18.5714	9.685	0	241		1	1	1	1	3	1	1.33333	9.685	-36.7667	241		5	1	1	1	2	9.685	-36.1	241		1	4	14	1
9.68583	195	1	1	293	435	1	243	271	246	269	1	176.1		1	225	337	424	1	400	1	198.429	9.68583	0	195		48	1	65	1	1	36	25.3333	9.68583	-150.767	195		1	1	335	53	97.5	9.68583	0	195		40	1	8	482
9.68667	157	1	1	133	1	1	131	154	161	160	1	74.4		1	145	186	216	145	211	113	145.286	9.68667	0	157		1	115	186	1	1	138	73.6667	9.68667	0	157		1	50	222	1	68.5	9.68667	0	157		245	1	1	320
9.6875	158	1	1	1	11	1	85	101	1	1	1	20.4		1	1	91	151	1	127	11	54.7143	9.6875	0	158		1	1	1	1	1	1	1	9.6875	0	158		1	1	117	1	30	9.6875	0	158		21	1	40	176
9.68833	228	1	1	6	11	1	6	5	2	1	1	3.5		1	41	1	72	5	25	1	20.8571	9.68833	0	228		22	6	14	66	1	35	24	9.68833	20.5	228		33	19	1	1	13.5	9.68833	0	228		27	19	1	55
9.68917	200	1	1	1	1	1	1	1	1	1	1	1		1	1	1	1	56	1	1	8.85714	9.68917	0	200		1	7	1	106	1	1	19.5	9.68917	0	200		1	1	33	1	9	9.68917	0	200		223	1	1	1
9.69	160	1	27	1	1	1	1	1	1	1	1	3.6		1	108	1	1	1	1	1	16.2857	9.69	0	160		1	6	1	1	1	1	1.83333	9.69	0	160		1	1	1	1	1	9.69	0	160		104	1	1	1
9.69083	156	1	1	1	1	1	1	1	1	1	55	6.4		1	9	231	54	33	1	53	54.5714	9.69083	0	156		63	39	92	52	1	1	41.3333	9.69083	34.9333	156		1	1	230	41	68.25	9.69083	0	156		1	1	1	107
9.69167	181	1	1	1	1	1	1	1	1	1	1	1		1	1	1	1	1	1	1	1	9.69167	#DIV/0!	181		1	1	1	1	5	111	20	9.69167	0	181		1	1	230	79	77.75	9.69167	76.75	181		142	1	7	345
9.6925	172	1	1	71	71	26	70	73	59	108	1	48.1		31	94	57	1	1	89	1	39.1429	9.6925	0	172		1	72	1	70	34	1	29.8333	9.6925	0	172		4	1	65	1	17.75	9.6925	0	172		1	48	1	1
9.69333	122	833	599	541	327	662	765	995	896	1114	795	752.7		544	498	622	420	164	591	1	405.714	9.69333	-346.986	122		179	216	414	235	475	1	253.333	9.69333	-499.367	122		674	282	396	185	384.25	9.69333	-368.45	122		163	293	320	615
9.69417	136	1	289	272	326	1	200	226	244	248	267	207.4		101	196	281	283	348	317	1	218.143	9.69417	0	136		41	236	307	349	153	1	181.167	9.69417	0	136		186	106	245	1	134.5	9.69417	0	136		568	1	1	384
9.695	144	1	76	115	51	1	225	213	129	74	1	88.6		1	76	1	92	73	115	1	51.2857	9.695	0	144		45	1	1	90	37	1	29.1667	9.695	0	144		1	34	66	1	25.5	9.695	0	144		28	106	162	151
9.69583	164	1	187	134	202	95	128	127	160	165	137	133.6		82	128	116	130	199	172	1	118.286	9.69583	0	164		1	143	200	185	100	91	120	9.69583	0	164		119	69	121	132	110.25	9.69583	0	164		288	68	100	203
9.69667	128	1	1	1	1	1	1	357	119	57	1	54		77	123	1	1	1	1	1	29.2857	9.69667	0	128		94	1113	1	1	1	1	201.833	9.69667	0	128		1	201	1	1	51	9.69667	0	128		1	1	1	14
9.6975	253	1	58	39	1	1	26	36	37	45	1	24.5		1	27	1	1	47	62	1	20	9.6975	0	253		1	1	1	78	1	1	13.8333	9.6975	0	253		1	1	1	1	1	9.6975	0	253		67	1	1	69
9.69833	139	776	598	283	1	967	447	1	1	1	1	307.6		1	194	1081	1	133	382	1132	417.714	9.69833	0	139		1	100	638	1	1	597	223	9.69833	0	139		1	597	140	1	184.75	9.69833	0	139		1	320	454	823
9.69917	223	1	182	142	228	1	105	142	1	149	188	113.9		1	102	218	239	209	223	75	152.429	9.69917	0	223		1	1	172	267	64	1	84.3333	9.69917	0	223		119	1	1	1	30.5	9.69917	0	223		300	1	1	1
9.7	85	1	4548	2664	641	7243	3525	1	4381	1	1	2300.6		1	1848	7304	1273	1133	3010	1	2081.43	9.7	0	85		1	789	1	999	4842	4274	1817.67	9.7	0	85		1	4172	1782	1	1489	9.7	0	85		1518	2667	3791	5995
9.70083	123	872	1	561	185	1125	598	1510	1199	1	1134	718.6		1055	359	1265	327	415	622	1268	758.714	9.70083	0	123		84	1	1	270	820	1	196.167	9.70083	-522.433	123		1	645	291	1	234.5	9.70083	0	123		561	1	1	1117
9.70167	173	1699	2229	1322	4956	1707	1677	2941	4085	4460	2598	2767.4		3425	3378	974	6292	951	5312	3463	3399.29	9.70167	0	173		958	6383	2569	3328	2187	4521	3324.33	9.70167	0	173		3425	3116	3238	1156	2733.75	9.70167	0	173		4078	2076	2157	5366
9.7025	155	871	1704	1456	2306	1	1090	1467	1376	1429	1696	1339.6		244	1165	1762	2649	2293	1989	1	1443.29	9.7025	0	155		1	1130	2049	2694	1	1	979.333	9.7025	0	155		1	320	1711	1293	831.25	9.7025	0	155		3698	1	1	2701
9.70333	77	22847	23920	19992	26702	1	17064	28929	19593	21240	24439	20472.7		6263	18376	21641	33272	31636	30859	1	20292.6	9.70333	0	77		23482	13174	24067	30021	1	1	15124.3	9.70333	0	77		1	1	23068	17331	10100.2	9.70333	0	77		47451	1	1	34074
9.70417	151	2664	1	3543	4742	1	2725	3419	3196	3430	3710	2743.1		104	2719	3994	5638	5377	4407	1	3177.14	9.70417	0	151		1	1	4662	5739	1	1	1734.17	9.70417	0	151		1	776	3965	1	1185.75	9.70417	0	151		8558	1	1	5798
9.705	221	1025	1464	1233	1782	1	922	1499	1129	1267	1557	1187.9		72	1019	1493	2062	1967	1770	1	1197.71	9.705	0	221		509	1	1665	2187	1	1	727.333	9.705	0	221		337	1	1581	1	480	9.705	0	221		3281	123	1	2148
9.70583	76	6241	5096	3455	4172	6181	4462	7651	5711	7528	5586	5608.3		5523	3884	5819	6474	4735	4529	7111	5439.29	9.70583	0	76		1	4054	5313	4258	4043	4812	3746.83	9.70583	-1861.47	76		6270	4624	3794	3750	4609.5	9.70583	0	76		7559	3566	4620	7439
9.70667	75	80400	45691	41561	48419	81407	55617	89487	80432	96171	68719	68790.4		79992	51704	71699	55870	42020	70843	79120	64464	9.70667	0	75		42931	66188	55017	37370	69233	65451	56031.7	9.70667	0	75		86699	64863	49209	52378	63287.2	9.70667	0	75		76327	48876	63418	88682
9.7075	105	7678	10067	8727	11445	1	7298	8468	7898	8829	8345	7875.6		3286	7569	9676	13416	12817	11280	1	8292.14	9.7075	0	105		1	6222	10435	13236	4689	1	5764	9.7075	0	105		5450	3178	9247	7999	6468.5	9.7075	0	105		21525	3820	4759	13365
9.70833	60	6642	6578	4212	3259	7209	5553	7589	6873	7842	5807	6156.4		7017	5024	5611	4086	5458	7118	6999	5901.86	9.70833	0	60		3822	3728	5154	3697	5136	5719	4542.67	9.70833	-1613.73	60		7988	6061	4972	6019	6260	9.70833	0	60		9068	4943	6959	7856
9.70917	117	8622	8625	6998	11442	7165	6590	5600	10568	10072	7419	8310.1		8417	10429	5111	14005	10300	13361	7558	9883	9.70917	0	117		5397	8761	6298	7568	9035	7660	7453.17	9.70917	0	117		12057	9564	10139	9697	10364.2	9.70917	0	117		16187	8385	9718	12454
9.71	103	11628	14986	10599	12300	10533	12573	11703	12400	12979	12204	12190.5		8062	11804	11222	12188	17027	16574	10460	12476.7	9.71	0	103		10017	14877	11894	13455	12238	10218	12116.5	9.71	0	103		13118	8971	12015	14736	12210	9.71	0	103		25389	9968	9793	16309
9.71083	73	141803	272328	195165	161426	192964	204268	110082	237475	233923	137304	188674		210864	220874	147615	212967	294566	292028	179267	222597	9.71083	0	73		92944	246253	160624	178980	231671	194878	184225	9.71083	0	73		200138	224472	226557	273803	231242	9.71083	0	73		417591	223855	206477	293012
9.71167	147	116146	144811	60734	89857	150689	121000	117237	169576	108172	130078	120830		124858	140437	100139	135669	184098	228799	142174	150882	9.71167	0	147		117864	111485	81833	77355	135943	130583	109177	9.71167	0	147		197890	127166	126369	149003	150107	9.71167	0	147		252429	126204	89452	131871
9.7125	177	13997	22230	14276	11598	17040	19720	11287	20228	17451	12328	16015.5		18790	19539	10721	16809	20291	22709	13006	17409.3	9.7125	0	177		8702	21966	12473	11522	20896	16184	15290.5	9.7125	0	177		26006	19121	18389	23210	21681.5	9.7125	5666	177		32839	18589	19149	22618
9.71333	194	1	301	235	296	1	182	235	218	226	286	198.1		10	168	272	348	344	314	1	208.143	9.71333	0	194		244	197	293	374	1	1	185	9.71333	0	194		157	1	253	218	157.25	9.71333	0	194		562	69	115	388
9.71417	229	1	137	85	1	1	60	88	92	80	121	66.6		4	64	106	112	149	112	79	89.4286	9.71417	0	229		150	94	161	180	1	71	109.5	9.71417	0	229		1	1	87	95	46	9.71417	0	229		221	1	1	130
9.715	130	1	1	1	1	243	1	1	1	1	1	25.2		1	1	1	1	362	505	1	124.571	9.715	0	130		176	1	264	268	1	1	118.5	9.715	0	130		1	1	378	324	176	9.715	0	130		530	225	501	1
9.71583	91	1	1	1	1	1	1	1	1	1	1	1		821	1	1	1	1	1	1358	312	9.71583	0	91		911	549	1079	1	1	1	423.667	9.71583	422.667	91		1	1	1	762	191.25	9.71583	0	91		1461	1	1	1
9.71667	160	1	219	171	165	1	122	196	167	201	196	143.9		60	1	163	238	257	263	227	172.714	9.71667	0	160		192	171	200	244	86	93	164.333	9.71667	0	160		130	1	203	147	120.25	9.71667	0	160		436	1	1	294
9.7175	200	1	1	25	1	22	1	38	1	1	1	9.2		1	1	1	1	1	1	1	1	9.7175	0	200		30	53	1	1	1	32	19.6667	9.7175	0	200		23	1	1	1	6.5	9.7175	0	200		1	48	43	1
9.71833	170	1	1	229	544	1	280	1	1	198	572	182.8		126	117	14	1	492	174	473	199.571	9.71833	0	170		1	281	228	1	352	254	186.167	9.71833	0	170		681	259	1	1	235.5	9.71833	0	170		324	255	1	139
9.71917	151	1	4004	1	1	1	1	1	1	1	1	401.3		734	1	1	1	1	1	1	105.714	9.71917	0	151		1	1	1	1	1517	1	253.667	9.71917	0	151		1	1	1	1	1	9.71917	0	151		1	1141	1	1
9.72083	87	1	1	1	1	1	1	1	1	1	1	1		1	1	1	1	1	1	3843	549.857	9.72083	0	87		6705	1	1	1	1	1	1118.33	9.72083	0	87		1	1	1	1	1	9.72083	#DIV/0!	87		1	1	1	6626
9.72167	197	1	104	75	101	67	75	60	32	73	106	69.4		31	60	63	63	103	91	1	58.8571	9.72167	0	197		85	97	94	135	67	56	89	9.72167	0	197		70	40	1	42	38.25	9.72167	0	197		164	1	58	97
9.7225	124	1	201	129	102	1	154	289	221	259	237	159.4		1	112	240	115	124	165	1	108.286	9.7225	0	124		1	45	205	148	132	93	104	9.7225	0	124		1	1	128	1	32.75	9.7225	-126.65	124		221	72	1	229
9.72333	216	1	1	1	1	1	6	1	1	24	16	5.3		1	1	8	1	28	27	27	13.2857	9.72333	0	216		1	1	1	1	1	1	1	9.72333	0	216		1	1	1	1	1	9.72333	0	216		1	1	1	35
9.72417	110	1	36	1	1	20	1	55	1	1	1	11.8		1	1	1	1	46	36	31	16.7143	9.72417	0	110		1	53	67	58	22	33	39	9.72417	27.2	110		1	1	22	38	15.5	9.72417	0	110		76	1	1	1
9.725	111	1	1	1	1	1	1	65	1	1	1	7.4		1	1	1	1	77	49	1	18.7143	9.725	0	111		1	82	38	4	1	1	21.1667	9.725	0	111		1	1	62	1	16.25	9.725	0	111		122	137	15	42
9.72583	268	1	1	1	1	1	1	1	1	1	1	1		1	1	1	1	1	1	1	1	9.72583	#DIV/0!	268		1	1	1	1	1	1	1	9.72583	#DIV/0!	268		1	1	1	1	1	9.72583	#DIV/0!	268		1	1	1	1
9.72667	233	1	1	1	1	1	1	1	1	1	1	1		1	1	1	1	1	1	4	1.42857	9.72667	0	233		1	1	1	1	1	1	1	9.72667	#DIV/0!	233		1	1	1	1	1	9.72667	#DIV/0!	233		1	1	2	10
9.7275	222	1	349	236	344	1	233	338	264	258	331	235.5		1	220	329	447	430	369	1	256.714	9.7275	0	222		1	1	324	461	1	1	131.5	9.7275	0	222		1	1	343	1	86.5	9.7275	0	222		670	5	140	473
9.72833	590	1	1	1	1	1	2	1	1	1	1	1.1		1	1	1	1	1	1	1	1	9.72833	0	590		1	1	1	1	1	1	1	9.72833	0	590		1	1	1	1	1	9.72833	0	590		1	1	1	1
9.72917	116	1	1	1	5371	1	12257	11816	1	1	1	2945.1		1	1	1	1	1	1	1	1	9.72917	0	116		1	1	1	1	1	1	1	9.72917	0	116		1	1	1	9154	2289.25	9.72917	0	116		13135	14684	1	5020
9.73	250	1	1	1	1	1	1	1	1	1	22	3.1		1	1	1	1	1	39	1	6.42857	9.73	0	250		1	1	1	1	1	1	1	9.73	0	250		1	1	31	1	8.5	9.73	0	250		1	1	1	1
9.73083	108	1	196	146	1	119	128	240	129	204	198	136.2		102	132	1	96	106	133	186	108	9.73083	0	108		149	189	183	77	241	111	158.333	9.73083	0	108		93	95	98	108	98.5	9.73083	0	108		191	98	218	1
9.7325	246	1	1	1	1	1	1	1	1	14	1	2.3		1	1	24	1	1	25	1	7.71429	9.7325	0	246		1	1	35	1	16	1	9.16667	9.7325	0	246		17	1	1	24	10.75	9.7325	0	246		1	1	1	1
9.73333	311	1	1	1	1	1	1	1	1	1	1	1		1	1	1	1	1	1	1	1	9.73333	#DIV/0!	311		1	5	8	1	1	1	2.83333	9.73333	0	311		1	1	1	1	1	9.73333	#DIV/0!	311		1	1	1	1
9.73417	135	1	1	1	1	1	613	1	1	1	1	62.2		1	1	1	1	1	1	1344	192.857	9.73417	0	135		1538	1	1	1	1	1	257.167	9.73417	0	135		1	1	1	1	1	9.73417	0	135		1	1	1	1
9.735	236	1	39	19	20	1	28	29	4	1	39	18.1		1	1	1	16	37	44	1	14.4286	9.735	0	236		47	41	46	1	1	18	25.6667	9.735	0	236		1	11	1	1	3.5	9.735	0	236		82	11	1	54
9.73583	132	1	1	85	1	1	1	338	1	1	1	43.1		1	1	1	1	1	1	1292	185.429	9.73583	0	132		1	1	1	1	1	1	1	9.73583	0	132		1	1	1	1	1	9.73583	0	132		1	1	1	1
9.73667	405	1	1	1	1	1	1	1	1	1	1	1		1	1	1	1	30	1	1	5.14286	9.73667	0	405		26	1	1	1	1	1	5.16667	9.73667	0	405		1	1	1	1	1	9.73667	#DIV/0!	405		1	1	1	1
9.7375	208	1	1	1	1	157	1	2	34	1	1	20		1	1	1	1	1	1	438	63.4286	9.7375	0	208		473	1	1	1	192	231	149.833	9.7375	0	208		1	1	1	1	1	9.7375	0	208		1	1	1	1
9.73833	272	1	1	1	1	1	1	1	1	35	151	19.4		1	1	1	1	1	1	99	15	9.73833	0	272		164	52	41	1	162	1	70.1667	9.73833	0	272		1	86	43	1	32.75	9.73833	0	272		1	53	1	1
9.73917	193	1	1	1	50	552	1	1	1	1	1	61		1	1	1	1	1	1	1100	158	9.73917	0	193		1277	768	1	1	1	678	454.333	9.73917	393.333	193		1	255	1	798	263.75	9.73917	0	193		1	1	1	1
9.74	157	1	187	1	718	83	1	57	223	110	165	154.6		41	186	1	361	1	125	497	173.143	9.74	0	157		244	148	301	318	84	168	210.5	9.74	0	157		96	96	16	156	91	9.74	0	157		463	60	98	1169
9.74083	583	1	1	1	1	1	1	1	10	1	1	1.9		1	17	1	42	1	1	1	9.14286	9.74083	0	583		1	1	1	1	1	1	1	9.74083	0	583		1	1	1	1	1	9.74083	0	583		1	1	1	1
9.74167	228	1	258	217	307	129	139	211	195	205	244	190.6		6	159	236	325	324	275	288	230.429	9.74167	0	228		273	178	295	359	138	157	233.333	9.74167	0	228		128	55	246	195	156	9.74167	0	228		527	73	1	378
9.7425	167	1	1	884	1368	1	889	1	1792	1	1	493.9		1	1	1	1	1	1	1	1	9.7425	0	167		1724	1	1737	1	1522	1	831	9.7425	0	167		2046	1	710	1151	977	9.7425	0	167		1	1	1	1937
9.74333	75	1	1	1	52479	1	1	1	1	1	1	5248.8		1	1	1	1	1	1	1	1	9.74333	0	75		1	1	1	1	1	1	1	9.74333	0	75		1	1	1	1	1	9.74333	0	75		1	1	1	54847
9.74417	248	1	1	1	1	81	1	1	1	1	1	9		1	1	4	1	1	1	179	26.8571	9.74417	0	248		182	1	1	36	105	108	72.1667	9.74417	63.1667	248		77	1	1	1	20	9.74417	0	248		1	32	1	1
9.745	117	1	1	1	11689	1	1	1	4747	1	1	1644.4		1	1	1	7489	3171	1	6303	2423.86	9.745	0	117		1	1	1	1	1	1	1	9.745	0	117		1	1	1	1	1	9.745	0	117		1	1	1	14154
9.74583	77	1	1	1	19198	14877	1	1	1	1	1	3408.3		1	6097	1	12588	1	1	28134	6689	9.74583	0	77		1	1	1	1	5284	14170	3243	9.74583	0	77		1	1	1	1	1	9.74583	0	77		1	1	1	26151
9.74667	101	3824	1	1	13594	1	1	5023	5896	4850	1	3319.2		1	3754	1	6414	1	3824	9744	3391.29	9.74667	0	101		2683	3140	5612	2873	1	1	2385	9.74667	0	101		1	1	1	1	1	9.74667	0	101		4329	2650	1	19831
9.7475	63	541	258	1	672	1174	1	1	196	66	1	291.1		1	1	243	682	1	1	1536	352.143	9.7475	0	63		1194	694	317	1	1	1	368	9.7475	0	63		839	1	1	881	430.5	9.7475	0	63		1	1	885	1
9.74833	165	1	17870	10689	1	35151	14333	1	1	1	1	7804.9		1	8604	33123	39	1	10195	36411	12624.9	9.74833	0	165		19397	95	21887	1	1	18089	9911.67	9.74833	0	165		1	18506	1	14126	8158.5	9.74833	0	165		470	12346	16207	1
9.74917	191	1	1	1	1	504	1	1	1	1	1	51.3		1	1	1	1	1	1	1166	167.429	9.74917	0	191		1242	1	1	1	812	710	461.167	9.74917	409.867	191		1	1	1	1	1	9.74917	0	191		1	1	810	1
9.75	168	1	1	1	497	98	87	1	570	383	582	222.1		199	1	1	225	1	1	335	109	9.75	0	168		105	157	156	16	1	1	72.6667	9.75	0	168		551	1	1	5	139.5	9.75	0	168		1	513	1	1202
9.75083	119	4068	1	1	29853	1274	1	3744	9086	5809	4896	5873.3		1	7866	1	14379	1	6258	14875	6197.29	9.75083	0	119		1	5016	8462	4726	1791	2207	3700.5	9.75083	0	119		3709	3164	1569	1	2110.75	9.75083	0	119		10814	2814	1888	45354
9.75167	187	1055	678	433	13435	245	177	1436	4140	2378	1737	2571.4		575	3220	155	5960	104	2500	6040	2650.57	9.75167	0	187		48	2555	3444	1849	422	737	1509.17	9.75167	0	187		1171	1091	620	163	761.25	9.75167	0	187		4157	881	430	20463
9.7525	145	653	490	213	7935	239	69	854	2422	1337	1097	1530.9		321	1828	77	3452	1	1437	3685	1543	9.7525	0	145		220	1129	2051	1089	339	532	893.333	9.7525	0	145		794	660	335	1	447.5	9.7525	0	145		2448	613	358	12092
9.75333	69	8296	4966	1901	44904	1	2631	2598	13398	8656	7345	9469.6		2470	10349	1053	1	1	1	23490	5337.86	9.75333	0	69		5055	10604	13531	1	3665	5068	6320.67	9.75333	0	69		5700	5218	799	3784	3875.25	9.75333	0	69		1	1	1	62359
9.75417	71	1589	1	453	8375	1	1	1	2594	1818	1	1483.4		1	2151	1	4277	1	1970	4547	1849.71	9.75417	0	71		1	1531	3059	1781	1	332	1117.5	9.75417	0	71		1	1	1	1	1	9.75417	0	71		1	1173	1079	11995
9.755	78	1	1	1	1842	3547	246	1603	397	78	1	771.7		1	1	240	5317	1	1	2718	1182.71	9.755	0	78		1648	2136	1	649	1482	963	1146.5	9.755	0	78		1678	1	1	1	420.25	9.755	0	78		1253	1550	1	2589
9.75583	122	250	1	1	217	1	152	354	1	1	1	97.9		239	87	1	1	1	1	653	140.429	9.75583	0	122		491	1	290	1	348	346	246.167	9.75583	0	122		370	234	98	304	251.5	9.75583	0	122		1	1	310	353
9.75667	70	1785	1	434	4746	1469	1	2903	1	1075	1	1241.6		314	1255	178	3436	1	1574	2625	1340.43	9.75667	0	70		2410	1446	2183	1211	1272	1	1420.5	9.75667	0	70		1656	1	26	1	421	9.75667	0	70		1	1	1	6537
9.7575	84	392	601	348	372	431	502	643	586	623	627	512.5		519	500	1	290	515	509	215	364.143	9.7575	0	84		354	436	332	269	730	246	394.5	9.7575	0	84		730	510	457	607	576	9.7575	0	84		970	750	538	236
9.75833	224	1	57	1	1	33	38	1	51	43	37	26.3		1	1	12	1	66	67	72	31.4286	9.75833	0	224		38	8	1	84	18	42	31.8333	9.75833	0	224		24	1	1	52	19.5	9.75833	0	224		1	14	18	17
9.75917	83	614	1	142	198	342	1	769	1	288	1	235.7		78	1	229	640	1	731	672	336	9.75917	0	83		1	1	937	578	1	381	316.5	9.75917	0	83		1	1	870	685	389.25	9.75917	0	83		1306	610	1	320
9.76	62	254	1	1	1	1	68	385	255	1	299	126.6		1	218	148	438	15	266	457	220.429	9.76	0	62		1	1	287	1	319	294	150.5	9.76	0	62		255	263	1	1	130	9.76	0	62		1	349	522	759
9.76083	85	1	1	1	4668	1	1	1	1	1	1	467.7		1	1	1	1	1	1	8077	1154.71	9.76083	0	85		4527	1	4975	2956	3591	1	2675.17	9.76083	2207.47	85		1	2923	1428	3387	1934.75	9.76083	0	85		1	2238	3204	5773
9.76167	535	1	1	1	1	1	1	1	1	15	1	2.4		1	1	1	34	22	1	1	8.71429	9.76167	0	535		1	1	1	1	1	1	1	9.76167	0	535		1	1	1	1	1	9.76167	0	535		1	1	1	1
9.7625	153	1	923	7	27	1	1318	1931	2832	2043	3267	1235		1688	1	1	173	1	3860	485	887	9.7625	0	153		1	1	1	1	2731	275	501.667	9.7625	0	153		3588	2913	1	1	1625.75	9.7625	0	153		176	3434	401	4536
9.76333	199	1	31	1	1	1	15	1	1	35	32	11.9		1	1	1	1	33	42	1	11.4286	9.76333	0	199		31	40	1	68	1	22	27.1667	9.76333	0	199		18	1	1	1	5.25	9.76333	0	199		1	1	1	61
9.76417	315	1	1	1	1	1	1	1	1	1	1	1		1	1	1	1	1	1	1	1	9.76417	#DIV/0!	315		1	1	1	1	1	1	1	9.76417	#DIV/0!	315		1	11	1	1	3.5	9.76417	0	315		1	1	1	1
9.765	375	1	14	1	1	1	1	2	1	4	1	2.7		1	9	1	1	1	1	1	2.14286	9.765	0	375		1	1	1	1	2	1	1.16667	9.765	0	375		1	1	7	1	2.5	9.765	0	375		1	1	1	1
9.76583	121	114	1	1	1140	526	1	1	434	1	1	222		135	277	1	605	1	424	1421	409.143	9.76583	0	121		1066	837	1	1	642	586	522.167	9.76583	0	121		1	272	1	731	251.25	9.76583	0	121		1	1	413	1935
9.76667	132	127	1	1	1	555	102	1	73	1	76	93.8		173	94	1	182	1	80	774	186.429	9.76667	0	132		79	163	135	99	521	1	166.333	9.76667	0	132		617	467	102	1	296.75	9.76667	0	132		262	398	1	1
9.7675	378	1	1	1	1	1	1	1	1	1	1	1		1	1	1	1	1	1	1	1	9.7675	#DIV/0!	378		1	1	1	1	1	1	1	9.7675	#DIV/0!	378		1	1	1	1	1	9.7675	#DIV/0!	378		1	1	1	1
9.76917	372	1	1	1	1	15	1	1	1	1	1	2.4		1	1	1	1	24	1	1	4.28571	9.76917	0	372		1	1	1	1	1	1	1	9.76917	0	372		1	4	1	1	1.75	9.76917	0	372		1	1	1	1
9.77	348	1	1	1	1	1	1	1	1	1	1	1		1	1	1	1	1	5	31	5.85714	9.77	0	348		1	1	18	1	1	1	3.83333	9.77	0	348		1	1	1	1	1	9.77	#DIV/0!	348		1	1	1	1
9.77083	177	1	1	1	200	1	1	1	1	1	1	20.9		1	1	1	1	1	1	1	1	9.77083	0	177		1	1	1	169	1	1	29	9.77083	0	177		1	1	1	1	1	9.77083	0	177		1	1	1	1
[truncated: 40,676 more rows]
[truncated: 16 more columns]

## Sheet: EE2
RT (min)	Mass	EE2 - CTL
8.20667	75	-10106.2
8.25833	65	-6509.17
8.2825	143	-66767.6
8.28333	73	-108735
8.28583	109	-419.867
8.2975	144	6643.17
8.29833	143	48532.6
8.30083	97	122
8.31667	61	8239.3
8.31917	129	7352.83
8.32417	73	68687.2
8.36917	72	-505.433
8.37417	172	2337.77
8.41667	151	221.067
8.46417	130	-2317.73
8.53333	126	-249.4
8.53917	168	-561
8.54333	140	-67.2667
8.58667	77	532.567
8.60583	143	-651
8.6175	126	155.2
8.65	132	-2903.13
8.65667	206	-178.733
8.65833	60	-6790.93
8.66	75	-22358.2
8.70417	143	3117.1
8.73167	157	840.5
8.7425	117	-45781.9
8.77417	93	1532.23
8.8225	95	1318.93
8.82333	199	-56.2667
8.83333	83	-4036.5
8.84583	69	-2474.1
8.84667	157	-76.7
8.8475	84	-2037.1
8.86	72	7058.07
8.87583	88	1914
8.89333	77	-7428.9
8.91333	118	655.267
8.91667	160	364.667
8.9325	175	28.9333
8.93667	119	-819.367
8.94583	171	122.467
8.96333	128	121.167
8.98167	107	-151.7
8.9925	147	-22246.1
8.99583	127	125.533
8.99833	84	-1071.97
9.03	72	-4886.93
9.06333	295	172.833
9.06833	170	-1108.43
9.12917	171	42.2667
9.13667	151	331.1
9.13917	147	14347.2
9.15083	177	345.833
9.16167	247	206.933
9.16333	263	40.1667
9.175	211	31
9.1875	96	496.233
9.19	140	80.2
9.2275	170	-337.5
9.29333	193	735.3
9.39167	188	-127.033
9.39667	122	-1684.53
9.4	144	-158.4
9.4125	118	-1518.97
9.41667	143	-158.633
9.4175	61	-4362.97
9.4325	149	-1938.87
9.4975	256	-22.9
9.54417	63	344.433
9.55833	77	-1961.5
9.55917	97	-217
9.5625	83	-913.667
9.57083	81	-129.433
9.61583	144	-159.667
9.61667	131	-1401.27
9.64167	105	117.667
9.65333	71	-488.233
9.655	95	-198.267
9.6825	168	-148.933
9.685	241	-36.7667
9.68583	195	-150.767
9.68833	228	20.5
9.69083	156	34.9333
9.69333	122	-499.367
9.70083	123	-522.433
9.70583	76	-1861.47
9.70833	60	-1613.73
9.71583	91	422.667
9.72417	110	27.2
9.73917	193	393.333
9.74417	248	63.1667
9.74917	191	409.867
9.76083	85	2207.47
9.78	182	19.3667
9.80083	105	2816.83
9.8525	137	26.8333
9.85833	75	11179.1
9.915	69	1572.17
9.9375	149	1859.87
9.95083	84	201.633
9.96333	74	3385.47
10.0217	132	293.467
10.0233	133	376
10.035	101	808.033
10.055	207	363.533
10.0917	75	16054.9
10.0933	101	-5654.27
10.1058	134	-241.5
10.1517	101	6500.23
10.1858	79	27294.5
10.2167	63	-4038.83
10.2333	79	-42521.8
10.2342	66	-33372.1
10.2783	82	-4208.97
10.2917	101	47343.3
10.2933	79	40410.8
10.3242	73	-2.80089e+06
10.335	181	127.833
10.3483	79	-41345.8
10.3492	93	-6799.03
10.3658	67	6731.93
10.3808	139	174.833
10.41	79	37146.5
10.42	85	2134.07
10.4258	65	-469.6
10.4592	143	-202.2
10.5458	87	-2687.27
10.5875	79	-63960.4
10.6142	259	-87090.3
10.6658	92	-111.767
10.6692	377	-24.5
10.7008	285	209.667
10.7575	204	2312.33
10.7633	133	1127.17
10.765	150	149.3
10.7692	190	343.267
10.7967	80	244.533
10.8	205	706.867
10.8117	69	916.5
10.8292	60	821.7
10.83	94	132.833
10.8317	89	440.367
10.835	191	85.3333
10.8375	115	524.767
10.8467	149	1298.7
10.8783	85	323.833
10.8842	87	658.5
10.885	116	-6072.13
10.9217	98	-45.8667
10.9233	355	140.567
10.9275	78	-3063.27
10.975	147	7480.67
11.0025	119	-1236.83
11.0167	86	-1302.57
11.0808	261	-37.2333
11.0892	136	-1981.87
11.0925	98	-1097.33
11.0942	129	-1776.47
11.1042	283	-21.2333
11.1225	80	-959.067
11.1833	359	50.1667
11.1842	267	119.333
11.2392	122	-676.9
11.245	93	-608.7
11.2758	187	622.567
11.2833	176	106.4
11.3033	161	173.267
11.3083	154	228.133
11.3183	86	1034.53
11.325	111	126.133
11.3275	83	477.767
11.3308	89	9031.43
11.3425	169	21.4667
11.3592	106	128.067
11.3658	97	208.633
11.3667	92	243.467
11.3683	64	197.067
11.37	73	24056.1
11.3942	75	2960.5
11.3992	119	123.933
11.4075	133	209.033
11.4175	130	-312.8
11.4192	207	728.333
11.4225	208	170.667
11.4233	337	75.3333
11.445	176	-259.7
11.4567	130	486.933
11.4592	115	2551.2
11.4617	250	29.0333
11.5083	255	21.9667
11.5167	190	134.533
11.5425	264	30.3
11.6033	76	676.667
11.6133	77	-4454.3
11.6475	172	2294.43
11.6517	108	-228.167
11.6658	173	279.067
11.6675	297	42.2
11.6683	258	161.3
11.6692	277	253.567
11.6775	73	263501
11.6783	281	96957.7
11.68	263	308.367
11.6817	256	129
11.6825	201	231.467
11.6842	354	220.433
11.6875	234	197.633
11.6883	273	137.767
11.6908	321	170.533
11.6933	68	636.767
11.6942	196	146.1
11.695	278	90.9
11.6975	224	135.6
11.6992	262	111.467
11.7083	305	69.9667
11.7175	62	-431.8
11.73	79	12335.6
11.785	330	34.6
11.8217	172	1001.73
11.8533	120	44.5
11.8633	171	136.5
11.9275	116	-16473.2
11.9308	90	-957.7
11.9883	131	-4542.53
12.0533	171	30.7667
12.0625	90	-667.2
12.0758	156	73.5667
12.2508	187	49.0333
12.3517	103	-2324.9
12.3525	62	-172.1
12.3542	73	-59299.9
12.3683	185	403.533
12.37	89	2579.97
12.3725	217	1128.97
12.3742	218	299.433
12.3808	105	298.667
12.4317	211	-1818.1
12.4408	75	2318.1
12.4617	145	146.1
12.4642	101	194.933
12.465	218	128.467
12.4758	115	348.367
12.735	227	-1035.4
12.7742	210	70.1667
12.7825	206	42.5667
12.7867	115	742.933
12.7958	93	213.7
12.8042	191	1230.63
12.8242	209	515.067
12.825	208	827.933
12.8433	125	-61.2
12.8625	199	-23.1
12.875	207	-3239.7
12.8775	211	-774.033
12.8833	208	-567.133
12.885	75	2946
12.8883	209	-493.233
12.8908	225	-533.533
12.8983	191	-816.367
12.9408	131	-4107.63
12.9692	82	869.867
13.0208	138	16.6667
13.0758	148	-3060.2
13.0833	134	-149.567
13.1033	245	113.5
13.1067	65	53.3333
13.1083	73	12781.5
13.1092	75	3944
13.1142	133	1190.37
13.125	148	1349.57
13.1367	218	475.667
13.1525	211	-98.9667
13.165	218	45.5
13.1817	191	-550.833
13.1892	221	-336.067
13.2292	163	-147.8
13.245	407	13.1667
13.2483	95	-190.2
13.2517	132	-1065.47
13.2525	131	-9145.4
13.2633	248	293.133
13.2733	262	-28.9333
13.32	65	30.7333
13.3625	89	196.5
13.3667	196	-130.333
13.3767	151	-492.9
13.3808	60	-476.1
13.385	191	85.8667
13.3875	117	-1618
13.3975	65	-103.267
13.4142	184	-37.1333
13.4183	88	-517.667
13.4208	242	-2421.33
13.4217	150	-1005.73
13.4233	77	-6413.63
13.4242	146	-1678.4
13.425	69	-445.5
13.4292	145	-100.7
13.4317	170	-173.4
13.4825	187	-47.2
13.49	132	-104.8
13.5125	151	69.0667
13.5367	284	-31
13.5533	63	-268.9
13.555	122	-116.5
13.5767	107	-276.567
13.58	60	-509.6
13.5883	184	146.467
13.595	64	-116.767
13.6317	60	-327.5
13.6417	221	-445.7
13.6433	193	-587.867
13.6525	237	-31.1667
13.6642	327	7.66667
13.7367	115	445.533
13.755	70	1349.07
13.8683	148	3526.67
13.905	105	872.833
13.9167	113	-207.533
13.9375	249	289.767
13.9383	335	533.2
13.9392	221	428.7
13.9758	405	-46.4667
13.9808	86	-7753.63
13.9817	170	-2053.87
13.985	231	-1197.67
13.9858	335	-1184.13
13.9883	247	-511.7
14.0083	76	-10114.1
14.01	75	-174434
14.0367	315	-32291.8
14.0425	172	-869.933
14.0433	162	-1765.27
14.0467	157	-1011.8
14.0483	177	-17614.1
14.0533	116	-18541.6
14.0542	102	-6666.8
14.055	174	-2159.9
14.0558	89	-38385.7
14.065	69	-2497.17
14.0867	221	6616.83
14.12	311	-45.6333
14.1208	196	207.667
14.1258	218	2097.2
14.1592	156	92.2667
14.165	68	-720.6
14.1683	95	-1230.93
14.205	177	-1866.3
14.2058	138	-588.667
14.2275	120	-927.767
14.2308	221	-755.967
14.2642	73	-125433
14.2958	104	-1658.17
14.3	77	3292.27
14.3017	117	-1705.47
14.3108	227	-642.5
14.3117	99	-321.867
14.36	72	-4438.63
14.3683	172	96.4667
14.3817	182	-528.333
14.395	166	-208.867
14.4067	91	-1299.87
14.4133	70	-2214.6
14.425	121	-2189.17
14.4333	179	-601.333
14.4508	135	-5000.3
14.4542	91	-1432.87
14.4575	105	-2161.07
14.4592	134	-2030.4
14.4608	133	-11942.2
14.4833	302	-865.7
14.5042	314	-3467.9
14.5058	212	-843.2
14.5175	95	749.467
14.5217	78	1678.63
14.5275	180	-300.833
14.5367	301	-3392.73
14.5383	90	-192.9
14.57	163	-740
14.5725	301	2505.17
14.5958	181	2466.83
14.5975	78	14562.7
14.6217	245	86.1
14.625	314	-3796.3
14.6358	363	-9.4
14.65	202	-68.8
14.6567	73	-110016
14.6583	151	-1430.67
14.6592	184	-254.7
14.66	263	-226.867
14.7158	66	23945
14.74	137	-1977.57
14.7433	91	-1021.53
14.755	181	-2436.2
14.7658	165	-532.8
14.7942	387	39.1667
14.8233	88	-377.567
14.8367	118	-104.5
14.8567	133	-5454.87
14.9133	79	16332.3
14.9308	283	302.5
14.9375	78	6065.5
14.9475	250	2677.1
14.9483	160	527.833
14.9492	83	5973.73
14.95	150	14815.8
14.9508	148	216061
14.9517	73	1.11549e+06
14.9525	66	44870.4
14.9533	133	60918.1
14.9542	101	20384
14.955	117	35352.4
14.9567	164	1442.07
14.9608	162	1445.37
14.9775	139	143.467
15.0033	66	11382.5
15.05	145	143
15.07	123	-273.533
15.0758	66	4700.03
15.0825	89	1276.93
15.0858	85	-738.667
15.135	76	574.467
15.1475	130	-142.4
15.165	66	3679.4
15.18	74	3927.17
15.185	63	348.433
15.1983	61	1334.43
15.225	211	1265.5
15.2533	127	72.9
15.2567	160	43.4667
15.2642	222	97.9
15.2725	159	95.3333
15.3192	78	1734.93
15.3375	263	-489.067
15.3875	79	11896.4
15.4242	121	435.233
15.4275	75	29031.1
15.4325	243	6496.43
15.4333	257	9340.3
15.4342	70	24545.6
15.4358	68	4277.47
15.4375	97	2771.6
15.4392	116	2852.97
15.4417	153	4100.83
15.4425	115	4072.53
15.4433	71	9640.13
15.4442	133	6285.33
15.4458	156	1792.67
15.4467	74	18719.4
15.4475	149	7220.43
15.4483	73	153885
15.4492	147	97187.2
15.45	117	6024.67
15.4508	87	5992.37
15.4517	91	904.7
15.4525	166	779.267
15.4533	183	2581.7
15.4558	101	16360.1
15.4567	110	1471.43
15.4575	85	16991.3
15.4583	105	6032.23
15.4592	72	30639.6
15.46	100	42797.6
15.4608	241	70257.2
15.4617	99	171623
15.4667	415	33.2
15.4817	180	465.833
15.4967	106	422.5
15.5142	151	-607.4
15.5175	69	988.967
15.5617	103	-1406.17
15.5708	255	407.867
15.5942	241	712.067
15.6275	103	-772.033
15.6467	145	-78.9667
15.6483	255	134.233
15.6592	314	696.333
15.7408	225	51.5333
15.7692	79	7840.37
15.78	204	2982.43
15.82	137	-183.667
15.8433	79	6724.87
15.865	93	284.967
15.9	258	29
15.9067	195	200.833
15.925	97	185.433
15.9267	81	356.567
15.9358	67	830.167
15.9458	242	182.233
15.9892	174	103.067
16.0367	88	114.567
16.1442	89	120.767
16.2225	63	-30.2
16.2808	105	95.1667
16.2925	233	68.5
16.2933	61	664.767
16.2983	247	447.3
16.3008	248	90.9667
16.3058	116	1134.13
16.3275	266	24.0333
16.335	89	212.633
16.34	107	46.3667
16.3417	174	1698.7
16.3942	204	46.3667
16.475	256	68.6667
16.5325	77	-577.833
16.58	103	-552.533
16.6108	139	-134.133
16.63	117	-4442.67
16.6317	174	2653.67
16.6358	84	2289.77
16.6367	77	-1395.77
16.6375	90	99.6667
16.6408	276	124.133
16.6483	142	61.9667
16.6542	277	43.2
16.6858	155	1047.33
16.6892	156	59.8
16.7017	193	-218.867
16.705	75	3183.33
16.7075	146	-124.267
16.7083	250	-42.3
16.7125	310	-29.0667
16.7225	70	-271.733
16.7233	69	-993.867
16.74	72	-168.233
16.7475	69	623.667
16.7717	88	1117.47
16.7808	116	1162.1
16.7825	60	1416.73
16.7983	166	39.9333
16.81	71	1175.97
16.82	213	56.9
16.8408	242	53.4333
16.9	71	331.9
16.9908	161	236.433
16.9933	219	1746.33
17.0017	159	269.333
17.0033	113	191.367
17.0117	86	-43973.9
17.0125	115	-16724.1
17.0133	73	-565844
17.0142	129	-32952.9
17.015	113	-1827.73
17.0167	100	-27111.9
17.0175	163	-540.7
17.02	99	-9846.87
17.03	296	-48.8
17.0325	181	-181.667
17.0342	66	-2640.9
17.04	169	-58.5
17.0767	137	-126.3
17.0833	89	4156.57
17.1267	292	77.9
17.245	327	31.1333
17.2733	130	40.3
17.2858	232	-31.3
17.325	64	-491.5
17.4083	259	142.567
17.4108	258	153
17.4183	89	5797.67
17.4217	84	7779.67
17.425	77	3643.5
17.45	67	942.8
17.4508	94	275.133
17.4675	120	136.5
17.4883	95	368.233
17.5192	85	692.533
17.5225	261	20.6
17.5408	249	97.9667
17.5542	103	1907.7
17.5825	113	130.033
17.5875	210	-67.9
17.595	209	-239.733
17.6158	177	136.333
17.6225	177	96.0333
17.6292	103	806.667
17.6367	248	77
17.6675	90	82.7667
17.6975	85	512.9
17.7083	99	763.367
17.7125	160	775.5
17.7142	132	1993.9
17.7442	168	86.6667
17.7475	144	479.433
17.7675	91	94.3667
17.7742	128	-449.433
17.8283	160	330.467
17.8825	121	-99
17.8967	208	-99.9667
17.8992	272	158.967
17.91	155	-1528.37
17.9125	79	7140.03
17.9267	264	-25.4
17.93	158	-723.533
18.0333	65	-2980.87
18.0525	175	-22185.8
18.0533	174	-163894
18.0758	185	-186.367
18.0775	92	-1294.6
18.1283	117	1382
18.13	89	-6344.57
18.1492	75	7983.3
18.1642	123	-2361.67
18.1692	82	-2215.9
18.1875	73	-390701
18.1892	75	-68764
18.19	117	-10559.5
18.1908	64	4035.37
18.1917	190	-1582.6
18.1933	70	-21808.1
18.1942	188	-25998.1
18.1958	174	-9991.3
18.1967	281	-80.4
18.2525	128	-2494.67
18.2717	299	341.833
18.3217	140	47.8667
18.3475	147	7977.37
18.3483	83	-630.2
18.3492	129	6141.73
18.3583	103	1248.87
18.3825	75	6752.6
18.3883	113	-269
18.4	188	-600.333
18.4008	262	-26.5
18.4208	74	-17298.7
18.425	73	-150587
18.4258	61	-11872.6
18.4283	149	-3777.67
18.4442	133	-2482.27
18.4558	205	194.967
18.465	104	-1214.8
18.4708	234	325.633
18.4775	116	-14196.8
18.4817	146	-489.067
18.5292	101	-5027.83
18.5325	86	-13545.2
18.5333	75	-26089.9
18.5342	73	-151762
18.5367	88	-1983.83
18.5717	193	-830.8
18.5833	186	-168.7
18.5958	232	538.567
18.6408	93	-803.333
18.6475	254	-11633.5
18.6625	100	-21533.4
18.6833	128	2665.07
18.7042	64	-10000.7
18.7342	170	-135.2
18.75	335	47
18.7575	96	-325.433
18.7833	320	13.1667
18.7933	115	-8561.7
18.8	61	-4549.4
18.8183	254	-6306.4
18.8217	105	-2326.27
18.8292	146	-314.5
18.8975	103	3053.23
18.9308	133	1138.67
18.9575	112	-127.8
18.9925	186	-1781.67
18.9983	176	-1161
19.0392	103	3745.03
19.0692	131	254.667
19.1033	62	106.1
19.1058	103	2127.93
19.1183	281	15.1667
19.12	171	-850.467
19.1425	252	-802.933
19.2075	94	-105.033
19.2767	79	123.167
19.3833	81	5005.17
19.4083	80	10522.9
19.4208	120	233.333
19.4833	147	22463.1
19.5308	254	-1696.43
19.5525	171	3465.3
19.5575	329	221.733
19.5833	317	100.4
19.6233	64	5381.5
19.625	291	18.6
19.7167	308	34.4
19.8042	156	-3448.53
19.8225	100	-9095.57
19.8475	70	-1811.47
19.87	100	-8508.83
19.8717	170	-2851.93
19.9367	100	-5476.6
19.9633	200	-67.1333
19.9775	170	-1942.9
19.9808	220	-3447.5
19.9842	218	-4296.1
19.9908	100	-16806.9
20.0033	99	-4407.9
20.0642	73	48037.7
20.085	321	61.1333
20.0867	117	7353.03
20.0892	118	379.3
20.0908	61	683.267
20.0917	103	3502.1
20.095	133	2128.7
20.0958	74	4434
20.0967	149	1234.9
20.0983	292	2364.77
20.0992	205	1775.47
20.1	204	310.467
20.1008	243	23.8333
20.1025	147	10117.2
20.1125	72	2938.5
20.1183	193	34.1333
20.1192	150	98.7
20.12	218	510.467
20.1417	75	9310.8
20.1442	175	105.133
20.165	75	10095
20.2183	117	3418.9
20.2283	81	23.7333
20.3208	232	995.967
20.3217	101	871.733
20.3942	261	161.633
20.4017	61	876.033
20.4025	100	3192.93
20.4775	67	275.833
20.4883	139	-41.4
20.495	72	-1937.2
20.5033	173	-662.7
20.5067	233	350.733
20.53	216	1474.2
20.5308	142	2472.1
20.545	119	238.333
20.5492	69	757.3
20.5542	73	47061.3
20.555	74	3376.97
20.5558	334	367.6
20.56	66	396.2
20.6075	80	214.567
20.6292	79	-82.1
20.6367	160	6650.1
20.6492	101	1050.63
20.6517	232	4995.3
20.6692	184	9.1
20.6792	73	76751.9
20.7192	133	1988.2
20.7242	232	4677.2
20.7383	98	-1044.47
20.7692	130	690.4
20.7708	100	9594.9
20.775	85	534.1
20.7767	102	942.833
20.7833	76	933.967
20.7842	60	930.1
20.8	129	378.633
20.8233	75	19688
20.8317	74	4921.67
20.8325	73	60921.9
20.9192	72	16017.4
20.9208	76	4488.33
20.94	350	303.233
20.9567	118	2279.8
20.98	70	12087.9
20.9858	87	2075
20.9867	163	1385.43
20.9908	71	2008.77
21.02	100	47584.3
21.0275	148	6966.5
21.0683	79	3879.27
21.1042	176	1394.97
21.1083	160	5238.4
21.1142	153	335.533
21.2017	156	26999.7
21.2108	179	621
21.2467	248	9527.07
21.2483	246	89833.5
21.2675	312	222.033
21.2742	93	880.3
21.2842	79	4368.8
21.305	142	8133.5
21.3092	235	189.4
21.3258	281	227.533
21.33	105	6975.93
21.34	106	910.4
21.3408	181	679.733
21.3433	93	1292.17
21.4208	80	343.4
21.4383	81	952.367
21.45	183	1994.5
21.46	74	9509.77
21.4608	73	71987.4
21.4625	221	6891.8
21.4633	325	681.667
21.465	87	1188.4
21.4683	193	954.5
21.4717	267	1116.6
21.475	172	259.067
21.4767	93	491.1
21.4825	156	4865.63
21.4975	269	159.1
21.4983	96	-304.3
21.5825	503	78.4333
21.6575	247	41.6667
21.7633	89	837.333
21.7683	204	1127.9
21.7775	69	562.2
21.7833	77	1254.1
21.785	138	-164.567
21.7925	73	-137400
21.7933	60	-2045.33
21.8625	205	5844.33
21.8633	204	11398.8
21.8642	127	179.067
21.865	201	4402.73
21.8667	172	1979.97
21.8683	84	1478.2
21.87	256	563.567
21.8725	292	234.667
21.8733	207	666.6
21.8758	143	671.367
21.8775	190	656.8
21.8983	114	331.3
21.9	332	135.4
21.9017	202	735.067
21.9033	291	737.767
22.0333	103	3025.77
22.0417	328	-35.3
22.0592	205	111.167
22.0675	346	81.6667
22.1075	244	248.7
22.155	94	-892.333
22.17	64	40302.9
22.1708	217	5426
22.1725	320	1328.9
22.235	105	10884.2
22.2417	121	2895.77
22.2458	91	3203.5
22.2467	89	8947.47
22.2558	294	-901
22.27	133	-227530
22.2767	190	-19550.5
22.3033	228	-3445.1
22.3183	175	-62533.8
22.3375	106	-8176.53
22.3517	147	-689628
22.3642	87	-22118.6
22.4008	130	-177432
22.4558	327	-178909
22.4575	74	12459.8
22.505	330	131.5
22.515	266	106.133
22.5758	167	-217.933
22.5817	85	665.333
22.665	191	-188.933
22.6858	170	-387.9
22.6867	71	-1543.43
22.7683	106	-1066.5
22.7708	160	-2173.1
22.81	131	-4066.6
22.8117	74	-9738.97
22.8183	134	-1358.27
22.8217	73	-115491
22.8225	98	-842.067
22.8467	72	-3000.07
22.8592	219	-300.167
22.8717	329	-307.4
22.8883	168	13.1667
22.89	233	21.3333
22.9175	149	-1598.93
22.9217	73	-88092.6
22.9442	160	787.833
22.9492	327	1129.17
22.9567	238	-1763.63
23.0108	79	-5467.9
23.0342	188	-2280.1
23.0383	100	-6022.97
23.04	134	-696
23.0558	133	-6166.2
23.0725	96	-245.667
23.0733	243	-641.833
23.075	170	-484.7
23.1075	73	-50362.7
23.1092	101	-889.633
23.1117	148	-1631.33
23.1258	327	-1392.07
23.1617	100	-5423.8
23.1675	188	-1382.63
23.1942	73	-36345.6
23.2283	238	-683.333
23.2842	79	-3830.97
23.29	99	-104.867
23.2942	73	-24641.9
23.2958	77	-1820.23
23.38	140	42
23.3967	133	-2255.73
23.4367	184	29.9
23.4625	169	17.3333
23.4958	188	-584.7
23.5208	160	-291.667
23.6717	250	-20
23.725	152	-94.8667
23.7467	60	62.8333
23.7475	73	9025.33
23.7542	194	40.2667
23.7567	242	28.5
23.7625	95	52.7667
23.7667	103	281.933
23.7725	179	64.6667
23.7975	81	137.867
23.8317	115	15
23.84	163	40.2
23.9092	224	33.4
23.9392	121	-49.5
23.9583	175	-86.1
23.9758	117	868.667
24.045	212	108.433
24.1542	230	74.5
24.185	205	211.733
24.1867	231	31.7667
24.2308	68	-604.133
24.2442	128	-598.1
24.2717	186	-717.6
24.3233	142	-3785.53
24.3383	79	984.667
24.35	192	143.733
24.3733	158	125.2
24.3833	73	5892.87
24.4108	149	348.967
24.4808	154	171.267
24.485	186	-840.4
24.5883	201	151.533
24.6083	168	64.1667
24.62	72	701.367
24.6933	157	-448.933
24.6942	247	18.6667
24.705	186	-1672.7
24.7125	229	79.5
24.7325	303	-50.7
24.7467	248	-27.9
24.825	406	-464.733
24.83	75	-53628.2
24.8308	147	-50067.8
24.8317	129	-9470.17
24.84	89	-4998.3
24.8458	407	-209.3
24.8508	291	-263
24.8658	322	125.033
24.8675	293	261.033
24.87	133	33468.6
24.8733	273	59916.2
24.8742	67	25852
24.8758	142	275.167
24.9083	343	66.8333
24.9225	89	5093.87
24.9467	65	-198.133
25.0133	207	-326.233
25.0158	257	25.1
25.0225	170	167.067
25.0658	78	31.1667
25.2142	130	113.767
25.2158	111	81.5
25.2367	166	-41.4
25.2583	136	25.8333
25.2692	60	179.9
25.2933	129	44.8333
25.3342	491	6.83333
25.4317	174	-27.9
25.465	145	106.167
25.625	79	-55.2667
25.7242	90	124.9
25.7525	149	1105.07
25.755	91	115.067
25.76	148	1180.8
25.7633	117	1819.17
25.7642	104	887.2
25.765	105	491.467
25.7658	103	9269.77
25.7667	218	1287.93
25.7675	75	3138.2
25.7692	89	1420.93
25.77	129	1848.07
25.7708	73	44833.6
25.7725	217	6233.6
25.7733	142	94.4667
25.775	147	5988.1
25.7775	135	244.233
25.7783	118	197.533
25.7858	66	193.633
25.7925	293	20.5333
25.7958	292	35.4
25.7983	114	202.367
25.8042	145	118.9
25.8083	127	77.9333
25.8125	93	11
25.8425	202	101.267
25.8442	306	111.333
25.8625	304	13.5
25.8633	245	20.1667
25.865	260	34.0333
25.96	426	7.16667
25.9825	105	1121
25.9883	143	891.4
25.9892	158	479.933
25.99	217	3708.1
25.9908	319	3373.63
25.9917	73	65010.6
26	131	2076.37
26.0008	89	3959.47
26.0017	75	13270.9
26.0033	207	677.933
26.005	74	5537.9
26.0092	103	5886.97
26.0108	129	4402.7
26.0133	133	4533.77
26.0142	157	2425.77
26.0167	217	1856.2
26.0175	149	1820.4
26.0183	163	441.767
26.0525	318	27.8333
26.0583	200	119.567
26.065	188	73.2667
26.0658	117	2700.93
26.0717	160	707.233
26.0725	133	1790.17
26.0733	103	3248.83
26.0742	319	714.033
26.075	149	720.767
26.0758	73	29760.5
26.0767	72	679.167
26.0808	157	1008.77
26.0892	129	3371.17
26.115	193	32.3333
26.3083	159	675.333
26.34	78	773.4
26.4092	96	102.667
26.4408	82	387.467
26.5392	141	865.067
26.5433	295	33.5
26.5525	147	94552
26.7567	115	474.3
26.8083	133	-2260.8
26.8567	101	729.733
26.8617	119	272.133
26.8658	218	140.633
26.9225	73	17412.1
26.9433	288	1.66667
27.0633	135	291.867
27.0692	90	149.967
27.0725	99	335.7
27.075	71	617.8
27.0783	74	2512.87
27.0933	89	1744.27
27.0942	133	2493.7
27.095	73	30667.6
27.0967	175	41.8333
27.1375	432	41.6
27.1708	61	415.2
27.2592	129	281
27.3342	77	-113.333
27.3825	72	-53.2
27.5092	60	56.7667
27.5458	207	-38.2333
27.63	78	106.6
27.6975	66	52.5
27.715	64	-40.2667
27.73	63	-24.6
27.805	305	25.6
27.8058	159	94.8
27.82	67	49.2
27.8283	75	-560.2
27.84	96	37.5667
27.8433	117	191.167
27.8467	104	28.6333
27.85	334	49.3
27.8558	102	61.4333
27.8567	292	130.567
27.8575	293	36.6333
27.8592	74	927.567
27.86	73	11148.2
27.8608	305	134.633
27.8617	204	142.7
27.8658	217	1284.4
27.8708	77	88.4333
27.8717	96	36.6667
27.8725	68	34.1333
27.8825	134	47.6667
27.89	133	328.333
27.8908	78	-154.3
27.8917	115	102.267
27.8925	155	21.9
27.9167	285	21.6
27.9342	69	149.533
27.9383	335	16.1
27.9592	357	18.5
27.9675	327	33
28.0392	78	35.5
28.0475	231	35.0667
28.1433	147	-187.8
28.1475	305	29.0667
28.1517	66	-67.2
28.165	217	81.7
28.1892	60	37.2
28.2483	305	4.83333
28.3075	220	62
28.3767	311	20.4
28.3908	74	74.7333
28.4008	116	80.3333
28.4033	77	92.4
28.4333	207	18.5667
28.4375	218	43.5
28.4425	217	111.067
28.4475	135	16.8333
28.4783	145	19.5
28.4933	131	119.533
28.5558	94	6
28.6233	403	13.3
28.6308	206	33
28.6517	148	-213.5
28.6758	337	26.4
28.7392	319	40.7
28.7817	218	66
28.815	73	2017.9
28.87	173	107.667
29.05	319	54.0333
29.0775	113	159.5
29.0817	192	57
29.0825	186	42.5333
29.0842	126	34.6
29.0858	88	85.2
29.0875	243	37.3333
29.0917	128	43.7333
29.0942	149	249.1
29.1	79	73.8667
29.1017	402	58.5333
29.1042	89	506.567
29.1067	96	66.5333
29.11	103	971.333
29.115	131	469.267
29.1208	202	751.833
29.1217	173	487.2
29.1225	116	408.533
29.1233	130	321.167
29.1275	144	114.167
29.135	129	1994.13
29.1408	87	1975.83
29.1433	105	86.6667
29.195	535	33.5667
29.2025	207	394.5
29.2233	108	23.4667
29.2375	88	89.6667
29.2708	79	435.733
29.2958	360	29.8333
29.3042	91	161.767
29.3092	590	8.66667
29.315	124	24.1333
29.3725	422	21.2667
29.375	318	51.4667
29.4058	132	-39.1
29.4117	85	62.9
29.4367	207	210.4
29.4683	322	20.9667
29.4825	203	160.367
29.485	243	160.733
29.49	83	159.6
29.4983	187	32.9667
29.5075	213	35.1667
29.5108	214	43.5
29.515	77	59.3
29.5158	74	326.833
29.5208	75	889.033
29.5217	127	33.5
29.5258	208	10.5667
29.5383	144	143.7
29.5442	186	23.3333
29.5783	333	63.9
29.5808	189	56.5667
29.6025	131	-41.2
29.6375	193	4.93333
29.6408	285	72.3333
29.8483	136	18.8333
29.8492	75	1406
29.8833	64	43.5
29.89	140	15.0333
29.8925	72	444.467
29.9	74	4083.87
29.915	172	119.7
29.9158	229	299.767
29.9175	103	3594.13
29.9183	205	2346.4
29.92	262	450.9
29.925	129	1873.6
29.9258	148	787.8
29.9267	131	446.133
29.9275	256	14.4667
29.9583	88	52.4667
29.9642	61	256.8
29.97	190	164.267
29.9833	135	187.7
29.985	119	354.733
29.9867	87	261.833
29.9925	162	17.6667
29.9933	133	2733.67
29.995	103	7448.77
29.9992	205	3417.9
30.0008	147	8113.17
30.0017	73	42593.1
30.0025	159	142.533
30.0033	74	3648.93
30.0042	157	1949.4
30.005	207	460.533
30.0067	173	310.967
30.01	245	29.6333
30.0117	148	1328.33
30.0125	204	579.5
30.0133	131	836.967
30.0175	231	159.767
30.0192	130	392.867
30.02	217	1726.3
30.0217	118	255.933
30.0292	170	42.2333
30.03	319	3171.43
30.0317	331	20.3
30.0342	174	107.2
30.0375	206	631.567
30.0508	73	-3102.5
30.0642	125	22.7
30.0658	175	130.5
30.0717	303	20.9
30.0858	278	36.5667
30.1308	204	33.3333
30.145	172	523.133
30.1733	73	6811.7
30.1792	63	-23.9
30.1883	370	49.2667
30.3242	540	11.3333
30.4183	63	-31.9
30.4992	208	28.5333
30.5325	117	22.8667
30.61	78	22.5667
30.7008	64	44.6333
30.765	203	17.8333
30.8325	142	34.6667
30.8392	249	8.5
30.8967	75	224.533
30.9417	77	75.8667
30.95	149	34.8333
31.0383	111	32.8333
31.1158	265	95.7
31.1183	357	130.233
31.1192	431	125.5
31.125	74	1000.33
31.1258	73	10212.4
31.1275	222	165.1
31.1283	149	211.867
31.1567	192	59.8333
31.1592	217	407.7
31.1783	310	13.6
31.1992	319	109.833
31.2258	204	48.8
31.2625	297	29.3333
31.2875	78	31.7
31.3125	70	19.8333
31.4042	193	21
31.4475	422	6
31.515	111	14.4
31.5333	73	506.867
31.5617	147	564.233
31.6108	409	7
31.7908	147	877.1
31.8183	85	57.4
31.825	73	-1553.6
32.015	89	94.9
32.065	88	13.8333
32.2083	297	44.1
32.2183	267	58.1667
32.2192	222	183.533
32.2208	74	317.5
32.2217	149	130.167
32.2225	221	790.3
32.2233	369	108.8
32.2242	73	4904.7
32.2267	147	983.1
32.2275	370	40.9
32.2292	66	110.3
32.2383	75	1218.2
32.3317	193	128.567
32.4033	281	20.5667
32.4142	84	97.2667
32.5517	191	44.2333
32.5558	133	63.3667
32.6292	111	29.6667
32.6325	149	52.3667
32.65	76	-56.6
32.7567	111	22.6667
32.92	66	-67.7
33.0167	355	323.067
33.0417	60	37.3333
33.1075	69	-24.1333
33.1767	73	865.333
33.1883	103	110.6
33.1958	116	25
33.2442	61	21.1667
33.4292	135	16.5
33.4483	204	21.1667
33.5117	135	31.1333
33.5217	79	53.2667
33.5325	241	35.9667
33.575	69	33.0333
33.6383	381	5.66667
33.7	70	-102.433
33.7192	129	-264.7
33.7492	113	-25.3
33.8767	115	20.1667
33.8917	75	-187.4
33.9342	149	64.2
33.9767	147	996.8
33.9842	156	16.5
34.0025	73	1679.4
34.0367	281	22.2
34.0408	60	-34.4
34.115	282	71
34.1183	283	43.2667
34.1192	223	123.233
34.125	207	387.1
34.1258	369	124.7
34.1275	221	956.833
34.1292	295	287.333
34.13	73	3894.77
34.1308	222	219.6
34.1333	281	283.433
34.1342	189	14.6
34.1367	74	286.667
34.1383	296	101.533
34.14	103	76.3667
34.1483	327	21.8667
34.1525	371	38.5
34.1533	265	40.1333
34.1967	73	634.167
34.23	63	-20.9333
34.2408	150	17.3333
34.2967	101	-40.6667
34.3108	77	47.4
34.3875	115	-40.2
34.4092	183	-34.6
34.4108	587	-12
34.415	99	-26.6
34.4417	173	-17.1667
34.4783	78	-28.4667
34.5625	77	56.8
34.5758	76	38.4
34.6033	257	-23.6333
34.615	149	-97.4667
34.7467	96	47.3667
34.7708	193	-116.733
34.775	329	-25.1667
34.7858	77	98.8
34.7958	381	-16.3
34.8183	177	33.5333
34.8192	75	684.2
34.8267	76	61.6667
34.8333	85	62.6667
34.8508	61	-58.5
34.885	77	-62.4
34.8925	63	-27.7
34.8975	103	124.633
34.9525	72	56.3333
34.9625	137	15.5667
34.9867	217	-43
34.9967	76	37.3
35.0108	147	1351.7
35.02	131	101.467
35.0675	67	-37.8
35.0742	207	-36.4
35.12	75	-941.833
35.2308	117	-69.8333
35.2317	208	27.2667
35.2483	64	63.2667
35.325	133	30.4667
35.3283	85	11.9333
35.4058	89	48.9
35.4183	74	224.667
35.4258	131	116.367
35.4442	72	49.7333
35.5042	147	664.4
35.5433	66	167.367
35.6158	129	-23.5
35.6283	70	-260.467
35.6308	149	-918.3
35.6333	150	-85.9
35.6708	149	574.867
35.6733	167	155.533
35.6767	150	65.6667
35.6975	75	126.667
35.745	101	-158.833
35.755	203	-132.6
35.8	64	64.3
35.8608	129	68
35.8758	64	52.3333
35.885	283	50.8
35.8992	209	-35.9
35.9033	369	143.867
35.9042	101	32.9333
35.905	115	32.7
35.9083	281	261.5
35.91	73	3866.3
35.9108	295	314.7
35.9117	147	1615.7
35.9125	207	426.933
35.9133	221	1086.1
35.92	296	105.133
35.9217	133	161.467
35.9617	282	35.1333
35.9717	78	24.2667
35.9875	265	35.5
36.1883	165	-71.0667
36.3608	77	53.1
36.4925	205	112.933
36.4933	119	58
36.4983	148	414.167
36.5042	133	397.033
36.5075	156	13.9333
36.6733	76	44.8333
36.6967	133	68.3667
36.7358	149	69.1
36.7692	131	252.367
36.7808	70	-39.2
36.8058	105	39.0667
36.86	85	-25.2
36.8867	133	76.6667
36.9708	64	-40.9333
37.015	193	14.5
37.26	207	43.5333
37.3392	149	150.333
37.4125	78	37.2667
37.5708	281	233.133
37.595	369	118.867
37.6158	222	181.3
37.6225	223	96.7333
37.6267	117	574.267
37.7858	61	30.3333
37.8333	148	225.6
37.8408	149	183.667
37.8467	72	42.7667
37.9008	75	83.3333
38.0925	209	103.6
38.0958	193	176.367
38.1075	131	-834.4
38.11	148	-532.533
38.1167	296	64.8667
38.1342	85	-420.367
38.1408	163	-175.267
38.17	96	36.5
38.4158	133	27.8333
38.4792	147	1606.8
38.4808	64	48.4
38.5425	153	-282.267
38.5992	95	191.833
38.6817	132	-79.7333
38.6958	101	152.2
38.78	173	-45.1
39.005	73	3132.13
39.0242	74	86.3333
39.0558	221	19.6333
39.0717	100	-36
39.0833	221	151.533
39.0967	208	19.6
39.1367	87	108.233
39.1592	284	12.5
39.1742	297	28.6
39.1767	73	1614.87
39.1817	147	1284.6
39.2008	148	149.867
39.2292	290	9.33333
39.2367	222	33.7333
39.25	115	10.5667
39.2775	71	21.0667
39.3242	325	-242
39.3308	147	1366.9
39.3333	66	238.7
39.3442	165	-18.4
39.3458	87	58.0333
39.3917	149	82.3333
39.3958	148	215.6
39.4008	267	-14.5
39.495	85	10.4333
39.62	147	1238.9
39.6258	251	31.3667
39.6442	133	104.067
39.7083	209	-29.4333
39.7183	131	89.4333
39.7267	64	80.5333
39.7275	66	217.3
39.7408	83	-38.1333
39.7692	75	-155.1
39.7742	111	14
39.7867	131	121.367
39.7992	147	1177.4
39.8042	66	313.733
39.8217	148	237.333
39.8317	149	120.833
39.8508	133	49.3
39.8692	74	107.9
39.9258	281	25.2
40.205	281	55.2667
40.2525	217	-94.9667
40.2717	66	121.533
40.2858	148	209.933
40.2925	87	60.6333
40.2983	249	12.6667
40.325	66	225.067
40.365	249	11.8333
40.3858	87	104.133
40.4142	119	19
40.4217	148	326.933
40.4233	149	158.967
40.43	66	421.033
40.435	72	85.7667
40.4475	67	41.3333
40.4733	131	143.667
40.4742	147	1698.7
40.53	61	63.5
40.5492	73	892.3
40.5917	78	22.4667
40.6283	74	117.067
40.6742	104	20.8333
40.7117	68	39.8333
40.7125	73	1222.27
40.7717	74	78.3333
40.8708	73	257.833
40.885	123	-13.5
40.9083	133	-433.633
40.9325	79	-35.6
40.9358	134	-68.4667
40.9417	105	-106.133
40.9725	209	70.4
41.0317	147	1121.2
41.0458	88	10.8333
41.0575	66	196.567
41.205	63	-36.0667
41.2775	131	33.7
41.28	87	31
41.32	137	-20.4333
41.3267	76	30
41.3775	149	80.7333
41.3858	61	43.8
41.4958	61	-48.2
41.5283	60	-27.2
41.6442	147	735.9
41.7175	65	19.2
41.7258	191	21
41.8775	61	40.5667
41.9408	147	1390.93
41.9433	66	218.267
41.9458	283	-16.5
41.9642	78	44.8
41.9658	132	19.7667
42.0017	79	58.3
42.05	117	20.6667
42.1083	148	130.833
42.1092	64	144.1
42.1242	147	1266.57
42.1658	66	125.367
42.2917	221	-203.733
42.3225	72	25.6
42.3908	119	26.5333
42.4117	281	31.3667
42.4208	115	13.4
42.4817	103	-25.2
42.5042	81	-28.9
42.57	209	-17.5
42.575	193	63.8667
42.6575	224	12.3333
42.6592	148	141.733
42.7267	61	52.8667
42.7417	149	100.167
42.7675	96	43.8667
42.7958	223	-19
42.8067	103	-142.567
42.82	73	769.6
42.8208	78	29.1333
42.845	66	146.4
42.8558	72	42.8333
42.89	148	87.4333
42.9292	148	146.267
42.9325	133	79.4667
42.9442	147	878.233
42.9675	74	30.9667
42.9783	281	36.1333
43.0325	87	37.6667
43.0342	73	308.233
43.0775	78	33.0333
43.2633	165	-17.4667
43.2808	195	4.23333
43.3108	66	148.067
43.3517	209	36.3
43.4308	137	-32.5
43.4908	282	27.5
43.5183	222	29.9
43.535	96	20.3333
43.5492	76	51.6
43.5725	74	64.5
43.6158	131	99.1333
43.6458	146	9.6
43.6483	136	17.6333
43.6592	148	149.333
43.6633	63	-38.7
43.6675	74	142.7
43.6692	117	49.0333
43.6708	147	830.267
43.6983	119	28.9333
43.7067	64	162.233
43.7083	81	-28.7333
43.7483	207	90.9
43.8958	223	-24
43.9508	100	-30.1
43.9717	133	-39.2
44.0058	71	36.5
44.0267	74	40
44.0775	77	-58.1
44.0942	96	-31.7
44.115	281	31.9667
44.215	148	49.2
44.2242	147	381.367
44.2975	115	26.6667
44.325	74	36.6667
44.3275	147	610.367
44.4317	76	-28.3333
44.44	81	-36.5
44.4825	193	72.1333
44.6108	96	71.4
44.6417	77	-129.5
44.6533	71	22
44.8608	283	-19.3
44.9658	209	22.5333

## Sheet: Diphen
RT (min)	Mass	diphen - CTL
8.1575	75	71813.5
8.16083	60	11026.5
8.16417	155	7034.4
8.175	97	698.95
8.17667	140	92.6
8.20083	155	-12302.3
8.21583	171	-402.4
8.2175	148	3549.35
8.22	196	56.5
8.24083	199	32
8.2425	130	1863.6
8.24333	129	5040.9
8.24667	148	2307.4
8.255	104	-2508.05
8.25583	62	-4544.6
8.25833	65	-6754.25
8.26417	72	1124.4
8.27583	123	-242.05
8.27917	75	-92372.3
8.28417	158	-667.7
8.29417	196	-3405.9
8.295	131	825.1
8.30083	97	59.25
8.30333	274	47.9
8.30667	153	67
8.31083	198	-209.3
8.31167	89	2013.15
8.315	103	8563.9
8.31583	101	7175.2
8.31917	129	12558.5
8.32917	116	727.2
8.33417	75	100626
8.335	84	-963.9
8.33833	162	339.3
8.34417	119	18177.9
8.3525	104	386.75
8.35417	120	19939.2
8.355	173	-492.5
8.35667	221	-127.8
8.37917	117	10247.5
8.38	78	1041.25
8.38083	106	3732.25
8.38417	161	-1444.95
8.385	133	-5250.8
8.38583	79	18462.8
8.38833	94	569
8.4	100	-2846.7
8.40417	72	1347.6
8.40583	116	894.45
8.4125	70	1493.5
8.41417	122	1276.5
8.41833	108	184.5
8.41917	158	1416
8.42167	119	606.5
8.42333	179	-126.45
8.42417	130	2243.9
8.43417	77	-2244.8
8.44667	82	-1220.75
8.45167	113	-572.7
8.45833	121	14798
8.46417	130	-2808.65
8.47	221	146.25
8.47333	155	-2647.55
8.47917	209	42.5
8.48	207	1655.75
8.4825	115	293.25
8.49	80	-865.5
8.4925	208	-1290.6
8.49417	207	-7187.8
8.495	191	-770
8.49583	299	-470.45
8.49667	193	-346.3
8.49833	192	-103.25
8.5075	95	-357.6
8.51417	118	380.75
8.51667	188	407.55
8.52	103	111.9
8.52417	179	152.35
8.52833	185	35.5
8.53167	87	130.5
8.53333	126	-264.65
8.53917	168	-522.5
8.54333	140	-78.1
8.555	169	257.8
8.56167	185	215.5
8.5625	111	1911.7
8.59083	81	4865.05
8.59167	101	-676
8.5925	146	-751.15
8.59417	145	-6400.7
8.59667	75	-9623.05
8.5975	216	23
8.60167	99	-493.6
8.60583	143	-651
8.61083	89	7294.25
8.61333	155	1964.5
8.62417	184	15.5
8.62583	186	1236.1
8.62833	201	111.4
8.64083	96	548.6
8.65833	60	-9705.6
8.66083	89	-69407.6
8.6875	187	209.25
8.68833	245	555.05
8.68917	244	3442.75
8.69083	69	12397.6
8.6925	70	17650.5
8.69417	77	271264
8.695	73	625254
8.69583	66	7908.05
8.69667	242	56.6
8.70167	89	60481.2
8.71083	146	3725.15
8.71333	117	44420.1
8.7225	104	14354.8
8.725	175	29705.8
8.72583	174	175497
8.7275	120	-8678.35
8.73083	170	-5023.9
8.73167	157	1265.75
8.7325	67	-3064
8.73333	78	-30329
8.73417	77	-341774
8.735	147	-573562
8.73583	73	-1.18487e+06
8.7375	129	-5192.9
8.7425	117	-58315.4
8.74333	120	4727.25
8.75333	108	1598.35
8.7575	248	1153.15
8.76917	85	7382.55
8.77167	71	18848
8.785	123	4166.95
8.78833	243	75.5
8.79083	120	6523.45
8.7925	163	4412.15
8.79583	140	716.7
8.79667	165	2772.1
8.8	60	8037.85
8.80083	73	572202
8.80167	134	5421.95
8.80333	207	149169
8.80417	161	2138.25
8.80667	72	319579
8.80833	64	1477.2
8.80917	125	1149.25
8.81667	170	2709.75
8.8225	95	1550.6
8.825	121	-3008
8.8275	131	-7778.9
8.82833	75	64573.7
8.82917	73	-404069
8.83	148	-4117.6
8.83083	61	20461.8
8.83167	160	-851.6
8.83417	68	5558.8
8.8375	311	13.3
8.8475	84	-2037.1
8.85583	174	-736.9
8.85917	159	-5578.95
8.8875	95	10384.9
8.89167	159	6157.75
8.89333	77	-7623.15
8.89417	154	-21943.5
8.895	152	-459717
8.8975	71	-7541.35
8.90083	89	10637.1
8.90833	112	-3263.4
8.91167	145	263.75
8.91333	118	2106.6
8.91417	117	18680.5
8.91667	160	798.5
8.92	140	-307.35
8.92167	209	355.65
8.92583	207	2905.65
8.92917	77	6443.65
8.93	170	1048.4
8.93583	148	-3782.2
8.9375	117	-31638.3
8.93917	147	-29796.6
8.945	112	2868.65
8.955	81	17793
8.9575	163	46.15
8.96333	128	261.5
8.96667	126	2264.9
8.975	157	-269.9
9.04167	97	488.5
9.05583	72	-4087.3
9.07167	81	1478.9
9.08417	135	3051.8
9.08583	61	3219.4
9.0875	105	21759.2
9.08917	73	42277
9.09	69	4422.55
9.09167	174	531.35
9.1	146	389.15
9.10083	91	1892.6
9.10333	134	1287.45
9.105	75	8948.65
9.10583	97	3576.75
9.1075	151	7354.75
9.10833	150	231.55
9.10917	155	10180.8
9.11083	74	6899.65
9.11167	321	414.75
9.1125	106	3013.7
9.11417	107	1664.65
9.115	98	1603.5
9.11583	87	3501.75
9.11667	178	5981.55
9.1175	189	1761.45
9.12917	171	107.1
9.1425	226	5482
9.14667	219	23.7
9.16417	112	23.25
9.18667	164	64
9.19083	155	590.1
9.1975	64	69.2
9.2	127	524.55
9.20167	91	967.45
9.20333	74	27093.7
9.20833	247	-425.9
9.2175	117	2933.8
9.22417	141	111.35
9.23083	254	171.9
9.2425	77	-1962.2
9.24333	174	23641.5
9.2525	103	-1518
9.26	149	-1330.75
9.31917	86	-600.9
9.36083	64	-613.4
9.42083	103	14656.9
9.42167	222	7281.25
9.43583	245	11.25
9.43917	145	239.5
9.44667	265	707.95
9.4475	223	3799.8
9.44833	224	561.7
9.45167	135	754.7
9.4525	163	311.95
9.45333	119	2175.4
9.46667	107	124.45
9.46917	221	29353
9.47	207	792.8
9.47417	192	173.7
9.4775	164	71.95
9.48167	286	-21.5
9.50583	66	-4398.8
9.52667	186	37
9.5425	239	36.9
9.58583	154	142.25
9.59333	131	1315.3
9.6625	267	-32
9.685	241	-36.1
9.69167	181	76.75
9.69333	122	-368.45
9.7125	177	5666
9.7225	124	-126.65
9.7725	81	198
9.78417	133	1985.2
9.79167	95	333.6
9.79667	74	2764.65
9.79917	134	216.95
9.80333	77	9140.6
9.80833	83	-420.35
9.82	106	326.75
9.82333	64	-2743.5
9.82583	97	337.25
9.82917	179	102.35
9.83	318	2465.4
9.83583	195	109.25
9.8525	137	81.75
9.86083	119	1099.7
9.86417	117	3383.95
9.87667	225	4763.15
9.87917	178	385.65
9.88	248	53.1
9.88583	207	91.1
9.8925	116	15957.4
9.90333	147	2514
9.91667	178	45.2
9.9275	154	22.4
9.94667	175	27
9.96333	74	3939.8
9.96583	190	589.1
9.9675	88	175.2
10.0217	132	256.55
10.0233	133	662
10.0342	139	115.95
10.0392	60	1038.45
10.0642	147	18829.3
10.0742	242	73.55
10.1217	148	35059.8
10.1558	165	1645.5
10.1817	242	16
10.1875	318	13
10.1883	207	92.5
10.1925	297	17.35
10.1967	225	6.55
10.2175	330	8.85
10.2208	129	3404.65
10.235	74	97452
10.2383	105	5256.2
10.24	131	21201.8
10.2417	149	19293.3
10.2425	144	3748.35
10.2433	75	155179
10.2442	61	40619.2
10.245	190	43822.4
10.2467	128	17545
10.2475	117	133490
10.2533	221	642.9
10.255	146	3261.05
10.2617	266	126
10.2642	202	230.25
10.2833	99	-9466.75
10.2992	155	1479.25
10.3242	73	-2.57447e+06
10.3683	239	35.25
10.4083	88	705.7
10.4142	69	2704.5
10.435	191	96.8
10.465	133	3771.9
10.4658	146	2632.05
10.4667	69	-3782.9
10.47	85	-3226.5
10.4867	100	11955.9
10.5092	96	4864.4
10.5125	366	-23.5
10.5175	125	378
10.5225	86	2763.5
10.5242	93	4190.85
10.5258	182	271.05
10.5267	155	450
10.5292	140	766.4
10.53	65	2226.35
10.5308	189	1040.8
10.5317	147	66509.5
10.5325	92	1588.65
10.5333	131	7683.25
10.5342	89	61551.7
10.535	156	69.2
10.5375	250	-341.25
10.5392	249	-1572.15
10.545	88	5424.35
10.5467	72	38447.7
10.5475	120	22804.9
10.5483	73	727376
10.5492	117	21154.2
10.55	116	165914
10.5508	90	7551
10.5517	75	84720.4
10.5525	107	1748.8
10.5542	91	18277.7
10.555	84	1867.85
10.5567	68	888.45
10.5575	180	131.25
10.5583	79	37144.4
10.5592	238	59
10.5608	262	174.85
10.5642	184	622.45
10.5683	98	412
10.57	178	352.85
10.5717	113	4130.7
10.5742	99	6683.15
10.5767	118	8220.7
10.5792	101	4672.75
10.5808	82	1483.35
10.5817	201	317.3
10.5833	149	4292.6
10.5842	226	50.15
10.5892	203	72.95
10.6683	68	303.1
10.7483	258	48.5
10.7842	89	99.75
10.8117	69	123
10.8442	218	669.25
10.845	68	64.6
10.8458	219	119.6
10.8492	318	6.25
10.855	84	345.5
10.8733	159	19.3
10.8783	85	93
10.8883	267	126.8
10.8942	70	224.45
10.9275	78	-3673.35
10.9617	146	-328.8
11.0375	93	340.2
11.0542	69	1274.6
11.0583	243	50.35
11.0867	233	258.5
11.0875	313	45
11.14	83	-1102.45
11.1458	251	27.4
11.1692	288	54.05
11.1992	130	389.4
11.2033	75	10814.8
11.2042	64	254.5
11.2467	67	802.1
11.2833	176	127.65
11.2842	140	63.9
11.2942	151	760.15
11.295	63	769.7
11.2983	278	566.15
11.2992	100	4017.85
11.3008	166	84
11.3125	179	14
11.3183	86	1107.45
11.325	111	136.3
11.3317	120	428.05
11.3367	148	1097.25
11.3375	191	233.25
11.3392	67	755.4
11.3408	281	933.25
11.3458	325	128.15
11.3483	284	43.05
11.3492	75	1594.25
11.3508	283	150.6
11.3517	282	253.85
11.3592	106	117.9
11.3608	110	27.25
11.3642	147	6907.4
11.3692	71	412.4
11.3758	151	160.2
11.3917	171	337.5
11.3925	216	173.15
11.3933	393	28.85
11.3958	217	23.75
11.4058	209	119.2
11.4192	207	939
11.4225	208	176.5
11.4233	337	61.5
11.4242	114	573.45
11.4325	76	378.95
11.4342	151	56.05
11.4367	177	41.15
11.4417	131	875.3
11.4542	67	292
11.455	150	320
11.4567	130	467.6
11.4592	115	1775.7
11.4617	250	22.7
11.48	392	4350.35
11.4817	100	-5720.15
11.4933	279	25.95
11.4967	338	33.6
11.5092	185	12.15
11.515	239	39.2
11.5208	246	-106.75
11.5225	311	9.35
11.525	112	13.05
11.5333	251	143.45
11.5375	100	1041.95
11.5425	264	63.05
11.5442	207	5292.75
11.545	393	1946.9
11.5458	256	68.75
11.5958	209	315.05
11.6233	118	815.2
11.6242	373	37.75
11.6458	318	12.45
11.6658	173	241.9
11.6675	297	32.45
11.6683	258	154.3
11.6692	277	236.4
11.6775	73	257776
11.6783	281	91650.7
11.68	263	307.2
11.6817	256	111
11.6825	201	274.55
11.6842	354	207.1
11.6875	234	200.05
11.6883	273	139.85
11.6908	321	163.7
11.6942	196	169.85
11.695	278	99.15
11.6975	224	114.35
11.6992	262	107.05
11.7008	109	173.65
11.7083	305	63.3
11.7442	210	154.9
11.7483	139	827.75
11.76	66	19611.6
11.7708	130	67315.8
11.7717	128	606.5
11.7742	176	33.85
11.7758	109	165.35
11.7808	369	12.55
11.785	330	47.35
11.7892	172	1191.75
11.7917	219	253.45
11.7967	229	-840.4
11.8075	188	290.3
11.835	231	103.65
11.855	145	48.75
11.8633	171	99.25
11.8692	173	30.5
12.0633	121	312.25
12.0842	147	11705.5
12.1408	261	17
12.1433	208	11.5
12.1483	242	1014.25
12.1767	102	367.75
12.2875	96	269.65
12.2883	211	-1158.05
12.31	73	103775
12.3517	103	-2206.65
12.3542	73	-65357.2
12.355	168	-2918.6
12.3558	77	-13468
12.3567	100	-7834.15
12.3575	135	-1176.4
12.3742	218	281.85
12.4117	117	-1514.35
12.4125	82	1304.9
12.4317	211	-1502.85
12.4617	145	174.6
12.465	218	133.8
12.4908	211	-566.95
12.5425	364	12.85
12.6525	221	233.45
12.7167	193	101.25
12.7267	90	533.3
12.7283	74	58037.1
12.7292	73	485582
12.73	156	12545.9
12.7542	65	900.7
12.7675	126	494.8
12.815	142	267.85
12.8158	69	1537.2
12.84	84	7927.4
12.8708	63	172.3
12.8875	76	666.5
12.91	80	198.35
12.9233	221	82.85
12.9333	185	42.1
12.965	242	-845.65
12.9658	108	-184.1
12.9983	94	65.45
13.0183	119	786.85
13.0958	82	948.35
13.1025	172	86.9
13.2392	111	47.5
13.265	160	251.7
13.3125	188	450.95
13.3133	159	621.05
13.3667	196	-117
13.3767	151	-471.4
13.385	191	89.95
13.3908	106	70.95
13.4092	68	1967.45
13.4517	92	345.1
13.4575	89	711.5
13.4658	141	113.8
13.4767	102	56.95
13.4775	85	1974.55
13.4783	188	52.7
13.4833	101	281.2
13.4842	84	424.2
13.4858	114	224.45
13.4867	123	150.4
13.4875	144	92.2
13.4925	118	146.45
13.4967	174	294.3
13.5025	176	50.55
13.5125	151	262.65
13.515	67	359.6
13.5267	68	-116.7
13.5292	188	130.5
13.53	313	24.05
13.5908	65	-339.85
13.6042	120	32.75
13.6708	115	-98.15
13.71	117	-399.8
13.7392	82	103.35
13.7483	96	110.35
13.75	200	27.55
13.7617	98	2464.45
13.8083	160	61.6
13.8167	243	19.5
13.8392	93	29.5
13.8467	137	70.2
13.8617	161	66.15
13.8775	220	30.45
13.9092	196	22.5
13.91	209	16
13.9425	150	146.15
13.9458	228	6.25
13.9733	391	-40.4
13.985	231	-1548.5
13.9858	335	-980.3
13.9883	247	-436.7
14.01	75	-167697
14.0442	247	116.55
14.0558	89	-29386.9
14.0575	147	-445953
14.0583	117	-282250
14.0592	101	-53479.9
14.0608	66	-22353.6
14.065	69	-2955.25
14.0708	130	6037.75
14.0725	117	219738
14.0783	94	538.25
14.0875	127	233.5
14.09	205	125033
14.0917	147	350725
14.1025	69	3857.15
14.1042	100	8523.1
14.1108	142	926.2
14.1125	78	2427.65
14.1142	218	57437.6
14.1158	111	1092.75
14.1242	219	691.75
14.1258	218	3221.45
14.1283	131	42647.7
14.145	85	-2666.85
14.1467	71	-4394.1
14.1475	249	33
14.205	177	-2001.3
14.2467	103	-7923
14.2642	73	-116425
14.2783	296	64.85
14.3017	117	-3411.05
14.3108	227	-1164.75
14.3142	210	-677.9
14.3167	298	-2076.8
14.3275	87	1129.75
14.3367	117	2395.5
14.3417	73	81510.5
14.3992	102	-1651.1
14.4483	506	3.75
14.4925	92	156.45
14.4975	196	163.5
14.5008	79	5927.45
14.5167	416	8.75
14.5175	95	601.8
14.52	379	8.75
14.5217	78	1392.8
14.56	267	288.85
14.5633	355	67.4
14.5667	249	38.9
14.5692	281	106.3
14.5708	357	26.45
14.575	399	58.75
14.6033	75	7199.75
14.6083	62	359.1
14.6133	203	620.15
14.6567	73	-114194
14.6575	77	-74120.2
14.7158	66	10168.8
14.74	137	-2792.9
14.7467	269	482.8
14.76	183	-661.6
14.7667	151	806.75
14.7742	207	3121.65
14.7767	80	456.4
14.7842	67	877.65
14.7942	387	34.25
14.8142	190	41.2
14.8192	434	-61.4
14.8375	230	76.65
14.8717	251	190.6
14.8792	136	5352.75
14.8825	77	8164
14.8883	63	1193.2
14.9092	198	27.4
14.925	300	2913.5
15.0792	63	613.1
15.08	113	237.25
15.0825	89	1111.35
15.1258	95	277.85
15.1292	110	29.45
15.1408	105	448.7
15.1875	216	6.45
15.19	176	18.5
15.2	79	4516.1
15.2083	99	440.3
15.2283	67	775.4
15.2308	80	228.75
15.2567	160	44.8
15.265	314	1237.5
15.3042	62	45.75
15.3058	135	973.8
15.3208	298	-1028.7
15.3358	278	-192
15.3375	263	-511.4
15.395	204	117.7
15.3992	77	-1238.55
15.4242	121	391.4
15.4292	442	31.15
15.4367	281	741.75
15.4383	221	2118.35
15.4542	267	976.8
15.48	443	253.75
15.5408	219	-27.1
15.5483	211	-2436.9
15.5567	73	-52833
15.5575	77	-3568.8
15.56	119	-299.75
15.5617	103	-1471.5
15.57	93	501
15.5817	148	311.6
15.5883	211	-2164.65
15.5933	154	44.5
15.5967	144	54.5
15.6033	143	218.05
15.605	304	4.25
15.6642	300	1803.75
15.6808	132	527.85
15.72	206	91.5
15.7225	93	652.4
15.7258	255	679.55
15.7292	197	124.05
15.7383	279	17
15.78	204	4030.85
15.7875	251	17.25
15.8392	224	204.05
15.84	445	295.2
15.8417	323	279.9
15.8425	266	141
15.85	81	310.6
15.8508	269	530.15
15.8525	223	1037
15.8533	221	6409.95
15.8542	145	511.25
15.8658	85	2630.85
15.8683	75	32324.2
15.8692	147	37775.8
15.87	339	214.55
15.8717	191	3388.4
15.8725	149	3196.25
15.8733	148	7347.15
15.8742	73	235791
15.875	74	25942.7
15.8758	60	8143.45
15.8767	134	4120.05
15.8775	133	27404
15.8783	188	91747.2
15.8792	100	133412
15.88	130	8451.4
15.8808	291	927.85
15.8858	86	4158.95
15.8967	63	187.75
15.8975	233	196.35
15.9017	373	13.25
15.9042	199	208.3
15.9075	78	359.3
15.9208	126	303.3
15.925	97	301.35
15.9258	340	670.1
15.9275	112	620.45
15.9283	165	687.6
15.93	222	980.95
15.9308	308	1298.65
15.9317	74	76555.4
15.935	84	5331.25
15.9383	95	387.3
15.9433	231	596.25
15.9508	554	8.5
15.9525	258	17.25
15.9542	64	865.8
15.9758	281	75.2
16.02	280	28.25
16.0558	60	203.65
16.0858	151	51
16.0992	93	74.15
16.1058	208	57.5
16.1192	314	314.2
16.1233	221	127.85
16.1242	83	43.75
16.1275	312	7
16.1292	96	61.45
16.1367	218	293.55
16.165	68	-85.1
16.1817	218	439.45
16.19	61	-92.5
16.255	348	1.5
16.2683	81	38
16.2692	218	251.8
16.2817	60	407.55
16.2833	86	222.4
16.2892	71	858.55
16.2933	61	543.1
16.3058	116	2379.55
16.3083	69	144.95
16.3092	103	2036.25
16.3117	174	2478.05
16.3125	160	4552.25
16.3142	234	300.05
16.33	72	453.3
16.3408	86	371.6
16.3608	190	226.2
16.3717	213	188.1
16.375	175	60.85
16.3775	160	1006.7
16.405	86	535.85
16.4225	143	102.85
16.4775	124	147.5
16.4817	74	54041.7
16.4825	73	451967
16.4842	116	17959.7
16.49	108	70.25
16.5083	155	139.25
16.5133	296	107.55
16.515	269	47.2
16.5442	187	91.35
16.5567	269	607
16.5592	158	660.15
16.5725	88	327.45
16.5783	253	130.05
16.5817	60	1081.95
16.5867	130	1522
16.5933	101	6970.6
16.5942	132	1414.2
16.5975	218	2683.8
16.5983	219	3974.75
16.5992	74	3799.4
16.605	105	108.25
16.6067	246	103.9
16.6092	91	176.3
16.61	98	272.75
16.6125	89	1037.7
16.62	202	451.1
16.6233	100	4514.85
16.6317	174	2535
16.6325	145	-667.8
16.6358	84	4951.1
16.6392	131	1222
16.6458	243	40.75
16.6533	248	38.85
16.6542	277	51.7
16.6558	104	316.9
16.6567	300	476.55
16.6608	486	3.25
16.6667	267	52.75
16.6833	149	-178.9
16.705	75	1374
16.7408	150	91.4
16.7625	146	321.05
16.7642	94	2.25
16.8408	242	48.6
16.845	200	30.7
16.8625	60	1868.05
16.8708	183	62.95
16.8758	72	1782.3
16.8775	62	387.5
16.88	86	2524.55
16.8808	73	42783.6
16.8825	144	1827.5
16.8833	102	2020.75
16.8942	174	696.7
16.895	146	232.3
16.8975	69	750.15
16.8983	70	4779.2
16.9	71	1310.9
16.9017	61	4121.1
16.9042	191	726.5
16.9058	76	1593.25
16.9083	160	14838
16.91	116	20024
16.9108	234	658.15
16.9125	162	707.15
16.9133	262	2601.65
16.9142	94	776.5
16.915	150	203.65
16.9175	63	-141.45
16.9183	190	3809
16.9217	84	441.3
16.9258	187	142.15
16.9283	304	11
16.9317	170	68.55
16.9442	74	5339.85
16.9842	183	58.75
16.9883	425	10
16.9892	206	65
16.9933	219	1410.75
16.9942	220	321
17.0017	159	306.5
17.0067	178	36.9
17.0283	257	50.2
17.0692	134	-210.85
17.0825	190	-283.55
17.0842	85	-536.8
17.0883	211	-464.15
17.1325	64	585.5
17.1625	267	-79.25
17.175	61	-697.8
17.1833	129	1708.05
17.3275	122	41.75
17.3675	72	6.2
17.455	149	-771.1
17.4925	89	831.65
17.5117	540	208.4
17.5192	85	861.95
17.5225	261	18.1
17.5442	100	-3030.65
17.5525	149	-1093.95
17.5825	113	123.2
17.6158	177	463.25
17.6233	274	286
17.6292	103	833.75
17.645	61	2381.6
17.6483	129	5916.15
17.6517	173	645.85
17.6525	275	59
17.655	116	1058.5
17.6675	90	61.35
17.7083	99	222.2
17.715	119	142.3
17.7633	254	144.7
17.8375	221	272.65
17.94	233	807.55
17.945	232	2157.6
17.9858	417	7
17.9967	250	535.9
17.9975	305	362.5
17.9992	248	3518.2
18	304	1111.7
18.0458	207	-2586.05
18.0708	294	133.3
18.1033	207	-414.7
18.1258	161	-234.4
18.13	89	-6990.65
18.1458	74	4265.9
18.1542	118	129.55
18.2175	255	339.25
18.22	115	3231.1
18.2542	174	24798.7
18.2575	130	5564.25
18.2592	218	32369.7
18.2642	307	3687.65
18.265	114	17353.6
18.2658	233	29936.8
18.2667	70	322262
18.2683	163	14408.6
18.27	189	1915.8
18.2817	323	504.05
18.31	136	-91.7
18.3192	336	-730.05
18.3333	116	2781.65
18.3442	268	-130.7
18.3483	83	-857.45
18.3533	191	-442.35
18.3617	341	-506.65
18.3883	113	-336.75
18.4208	74	-18546
18.4233	76	-3684
18.425	73	-148619
18.4258	61	-10791
18.4375	77	-4031.35
18.4458	337	27.75
18.4508	64	356.5
18.4542	63	164.15
18.4675	88	-1760
18.4708	234	425.55
18.4817	146	-499.15
18.5592	95	492.35
18.5717	193	-1410.3
18.5908	238	-95.25
18.6008	94	79.55
18.6708	343	457.65
18.6725	341	1840.65
18.6733	518	416.85
18.6742	325	957.85
18.7025	273	24.25
18.7042	64	-13153
18.7142	90	445.5
18.765	102	15157.8
18.82	202	746.05
18.84	130	2773.65
18.8717	241	411.65
18.8767	306	100.95
18.8775	232	4673.75
18.8942	69	995
18.8975	103	5051.9
18.9033	218	1323.1
18.9083	220	126.9
18.9125	144	585.95
18.9133	75	10998.5
18.93	128	2247.55
18.9392	234	569.95
18.94	167	-177.45
18.9575	112	-134.8
18.9667	243	428.15
18.9742	338	302.4
18.9925	186	-1543.75
19.0158	178	102.25
19.0358	257	64.5
19.0425	343	15.5
19.0667	103	3304.65
19.0733	174	930.25
19.08	191	656.95
19.0808	132	1006.55
19.0925	96	745.85
19.0975	153	1726.25
19.1325	231	167.65
19.165	187	294.6
19.1825	161	829.5
19.1842	200	-2093.75
19.2067	64	3752
19.25	144	1102.9
19.2575	147	11465.2
19.2817	109	389.55
19.3058	325	84.4
19.3192	201	569.85
19.3217	263	855.9
19.325	224	136.6
19.3258	481	13
19.3583	341	75.25
19.3958	321	152.85
19.4108	150	5547.15
19.4125	143	7783.8
19.4142	176	5362.5
19.4167	148	33612.2
19.4175	74	128959
19.4192	73	1.18411e+06
19.4208	120	1976.75
19.4267	146	4833.2
19.4292	130	32142.6
19.435	91	1112.8
19.4408	156	825558
19.4417	80	6157.1
19.4425	119	17528
19.4433	139	1505.15
19.4442	84	37558
19.4492	344	22.7
19.45	349	9329.5
19.4517	164	5049.7
19.4533	65	1294.2
19.4558	302	52.1
19.4575	256	819.45
19.4608	363	99.55
19.4617	315	74.1
19.4625	132	22702.2
19.4783	259	17255
19.485	86	25233.4
19.4858	230	66852.7
19.4875	260	7484.95
19.4925	298	41.95
19.5092	82	4533.5
19.5167	191	424.25
19.5192	257	192.1
19.52	300	265.65
19.54	89	1282.75
19.5525	171	2736.3
19.5558	315	1053.6
19.5567	314	3422.55
19.5575	329	228.4
19.575	100	6576.65
19.5792	202	103.6
19.5817	77	1317.05
19.5833	317	110.65
19.5942	230	838.1
19.5967	218	184.9
19.6158	217	248.15
19.6167	172	1731.35
19.6183	265	30.55
19.625	291	39.6
19.6417	228	450.35
19.6508	263	87.25
19.6525	315	7.5
19.6542	206	33.3
19.6558	326	12
19.66	269	197.4
19.7008	96	499.8
19.7358	79	1958.55
19.7433	228	79.9
19.8275	94	97.35
19.8683	72	-5618.2
19.8817	208	-49.45
19.8917	199	45.25
19.9017	153	270.15
20.0342	64	1970.25
20.0383	79	1316.45
20.0917	103	1866.35
20.0983	292	1387.35
20.0992	205	1043.3
20.1	204	196.3
20.1008	243	27.5
20.1025	147	17284.5
20.1192	150	132.2
20.1217	113	341.9
20.13	64	1831.1
20.1342	166	24.6
20.1617	156	5369.3
20.1633	156	7719.5
20.1817	147	9854.85
20.1892	150	53.75
20.1942	169	219.95
20.2083	124	14.25
20.2125	174	6611.2
20.2308	405	9
20.2317	176	50.2
20.2333	259	164.1
20.2408	302	8.25
20.2442	316	1.5
20.2458	77	884.95
20.2583	129	1520.1
20.2617	322	14.35
20.2658	110	109.15
20.2692	230	927.55
20.2758	166	84.35
20.2875	99	686.4
20.2983	246	419.35
20.3375	205	76.75
20.3508	114	1362.6
20.3617	244	208.1
20.3958	117	5573.3
20.4042	255	-330.35
20.4483	259	189.1
20.4775	67	189.25
20.5017	143	2167.05
20.5075	410	6.75
20.5092	149	519
20.5175	83	665.4
20.5267	204	76.65
20.5292	186	11472.2
20.53	216	3066.45
20.5308	142	12982.1
20.5342	147	14767.5
20.5442	99	1867.2
20.5575	135	210.5
20.56	66	1922.2
20.5617	134	157.25
20.5658	61	3302.7
20.5692	76	798.75
20.58	220	133.75
20.5892	117	5730.4
20.5958	87	97.1
20.6075	80	273.4
20.6142	126	68.4
20.6458	84	12186
20.6525	174	6802.5
20.665	313	158.8
20.7158	230	754.9
20.7258	80	53.9
20.7383	98	-1246.3
20.7492	350	62.8
20.7542	140	627.8
20.7575	139	1376.5
20.7825	281	-153.45
20.7858	218	193.75
20.8225	70	4279.5
20.8292	234	713.85
20.8367	317	28
20.8683	87	14375.5
20.8825	112	2356.2
20.8842	85	10264.8
20.885	71	7734
20.895	199	250.65
20.9025	139	1967
20.9108	275	204.8
20.915	77	5714.15
20.9217	156	12743.3
20.9225	73	-274218
20.9275	258	1520.75
20.9533	64	2050.8
20.97	198	568.6
20.9767	207	284.5
20.9858	87	619.25
21.0317	75	29093
21.0567	172	7000.5
21.0617	173	3443.85
21.0683	79	5062.35
21.0742	119	2420.85
21.0808	206	1815.35
21.0925	171	2127.4
21.1042	176	1283.05
21.1083	160	8170.9
21.12	156	16914.2
21.1258	164	94.75
21.14	288	306.6
21.1417	140	7197.6
21.145	170	4409.5
21.1458	332	7646.05
21.2017	156	21681.5
21.2283	71	9758.5
21.2317	74	125895
21.2375	81	1876.15
21.2658	139	5308.1
21.2858	198	1299.95
21.2933	68	-5971.7
21.3342	210	482.25
21.3592	219	-5051.6
21.365	206	1031.45
21.385	341	498.7
21.4025	122	-278.55
21.4175	174	2820.2
21.4208	80	371.65
21.4283	158	1126.55
21.4392	418	79.4
21.4408	200	5820.3
21.4458	203	103.05
21.4492	328	4442
21.45	183	2350.75
21.4508	184	530.85
21.4567	133	2709.95
21.4608	73	102042
21.4617	229	9579.45
21.4642	415	855.85
21.4683	193	852.75
21.4717	267	738.6
21.4725	231	1055.6
21.4825	156	11200
21.495	79	5387.85
21.4975	269	165.35
21.5025	357	137.7
21.5117	185	131.35
21.515	103	1872.3
21.5383	81	1272.6
21.5483	425	22.8
21.5633	156	1402.2
21.5817	167	261.05
21.5825	503	145.35
21.5833	189	184.65
21.62	73	71622.6
21.625	246	307.45
21.6267	198	646.55
21.6283	188	537.25
21.635	184	428.15
21.6567	102	309.55
21.6575	247	74.75
21.6608	135	64.1
21.6942	75	7952.3
21.6967	202	148.2
21.7167	306	442.75
21.7208	239	8.35
21.7292	126	209.4
21.7317	317	108.4
21.7417	335	84.25
21.7508	131	5227
21.7567	75	25273.7
21.77	202	194
21.775	231	66.75
21.805	79	5076.75
21.8175	162	79.45
21.8192	247	49.75
21.8408	337	29.75
21.8625	205	9215.25
21.8642	127	177.15
21.865	201	6801.4
21.8667	172	3498.05
21.8675	173	417.5
21.8692	183	900.6
21.87	256	959.9
21.8725	292	384
21.8733	207	968.1
21.8758	143	737.45
21.8775	190	930.8
21.8967	308	215.35
21.9	332	205.65
21.9017	202	1114.4
21.9033	291	1196.85
21.9467	124	161.85
21.9608	79	5588.6
21.9808	67	348
21.995	317	16.25
22.0217	196	-729.85
22.0258	124	943.8
22.0267	71	8059.85
22.0325	82	172.05
22.0383	159	415.3
22.0592	205	214.5
22.0625	103	2018
22.0675	346	40.5
22.0967	69	225.75
22.0975	110	21.5
22.1042	208	10
22.105	281	53.05
22.1075	244	238.7
22.1542	183	920.25
22.1558	232	672.55
22.1725	320	4407.9
22.2058	180	-2116.8
22.2192	63	2288.35
22.2575	173	-20347.1
22.29	134	-41369.9
22.3183	175	-77116.1
22.3258	154	-2091.9
22.3283	160	-67470.7
22.3533	238	-107534
22.3625	101	-41193.8
22.3642	87	-30830.2
22.4008	130	-218866
22.4425	69	-3517.2
22.4558	327	-211072
22.4608	231	-482.2
22.4992	320	66.4
22.5308	204	-884.6
22.545	81	-910.85
22.5492	360	14
22.5758	167	-315.35
22.5883	143	-697.4
22.6575	198	290.15
22.6875	66	2033.5
22.7133	239	-530.2
22.7225	189	-1205
22.7583	84	-4539.2
22.7642	239	159.75
22.81	131	-4542.85
22.815	238	-2524.45
22.8483	77	-3712.35
22.8625	64	7162.25
22.8908	148	-3230.55
22.9175	149	-2006.85
22.9417	196	-524.85
22.9442	160	505.5
22.9717	142	379.75
22.9833	273	41.45
22.9883	179	58
23.0408	303	69.45
23.0433	301	506.05
23.07	300	117.45
23.0717	301	42.75
23.1258	327	-1619.4
23.1333	172	-2147.3
23.1958	117	-6352.25
23.205	319	131.7
23.2117	154	51.6
23.2258	303	194.1
23.2283	238	-782.75
23.2442	81	10.7
23.2483	119	-291.2
23.2633	234	17.25
23.2817	287	41.4
23.2883	275	-384.35
23.2967	106	-6048.8
23.3008	337	-63.65
23.3467	78	1181.4
23.3483	281	39.4
23.4	272	76.7
23.4233	178	14.5
23.4242	117	-1983.85
23.4367	184	22.4
23.4383	150	32.25
23.4475	105	1474
23.4533	267	40.55
23.4642	220	12.85
23.465	164	19.4
23.4808	232	76.95
23.5	73	1898.9
23.5342	297	14.5
23.575	191	455.95
23.665	166	25.5
23.7325	209	14.9
23.7758	143	108.8
23.7858	298	37.75
23.7975	81	56.7
23.8	201	19.4
23.8317	115	84
23.8458	284	21.5
23.865	295	199.65
23.8892	116	209.25
23.9008	80	97.05
23.9275	205	-220.8
23.9392	121	-49.5
23.9583	175	-86.1
23.9758	117	474.5
23.98	74	939.45
24.045	212	55.1
24.0592	71	143.25
24.0675	332	174.1
24.07	333	94.65
24.0867	190	159.3
24.0917	232	1645.7
24.0925	233	336.65
24.0942	164	48.7
24.0958	96	239.1
24.1108	143	-337.55
24.1133	176	289.8
24.12	307	44.9
24.1208	149	307.55
[truncated: 1,115 more rows]

## Sheet: DEET
RT (min)	Mass	DEET - CTL
[truncated: 1,273 more rows]

[truncated: 2 more sheets: Fluoxetine, mix]
